# Supplementary material for: Alterations of gut viral signals in atrial fibrillation: complex linkage with gut bacteriome
Source: publisher site journal article supplement (doi:10.18632/aging.204222), 2022-08-18
Supplement: Supplementary file [file aging-v14i16-204222-supplementary-material-SD2.pdf]

## SUPPLEMENTARY TABLES

**Supplementary Table 1. The association between potential confounders and viral diversity.**

| Spearman correlation analyses |               |                |                 |                |                |                |               |                |
|-------------------------------|---------------|----------------|-----------------|----------------|----------------|----------------|---------------|----------------|
|                               | Shannon index |                | Pielou evenness |                | Chao1 richness |                | Simpson index |                |
|                               | Correlation   | <i>p</i> value | Correlation     | <i>p</i> value | Correlation    | <i>p</i> value | Correlation   | <i>p</i> value |
| AF                            | 0.499         | <0.001         | 0.522           | <0.001         | 0.168          | 0.095          | 0.567         | <0.001         |
| Age                           | 0.337         | 0.001          | 0.348           | <0.001         | 0.131          | 0.195          | 0.374         | <0.001         |
| Gender                        | 0.004         | 0.972          | 0.036           | 0.726          | -0.153         | 0.130          | 0.040         | 0.691          |
| BMI                           | 0.048         | 0.638          | 0.032           | 0.752          | 0.053          | 0.605          | 0.032         | 0.751          |
| TC                            | -0.215        | 0.032          | -0.229          | 0.022          | -0.107         | 0.289          | -0.248        | 0.013          |
| T2DM                          | 0.035         | 0.728          | 0.058           | 0.569          | -0.102         | 0.311          | 0.091         | 0.370          |
| HTN                           | 0.018         | 0.858          | 0.024           | 0.810          | -0.041         | 0.683          | 0.006         | 0.956          |
| Statin                        | -0.034        | 0.740          | -0.035          | 0.727          | -0.042         | 0.675          | 0.018         | 0.861          |
| Metformin                     | 0.089         | 0.379          | 0.124           | 0.219          | -0.086         | 0.395          | 0.140         | 0.165          |
| RASI                          | 0.312         | 0.002          | 0.304           | 0.002          | 0.145          | 0.150          | 0.296         | 0.003          |
| Amiodarone                    | 0.382         | <0.001         | 0.359           | <0.001         | 0.379          | <0.001         | 0.358         | <0.001         |

  

| Multivariate Linear Regression |               |                |               |                |                 |                |             |                |
|--------------------------------|---------------|----------------|---------------|----------------|-----------------|----------------|-------------|----------------|
|                                | Shannon index |                | Chao richness |                | Pielou evenness |                | Simpson     |                |
|                                | <i>Beta</i>   | <i>p</i> value | <i>Beta</i>   | <i>p</i> value | <i>Beta</i>     | <i>p</i> value | <i>Beta</i> | <i>p</i> value |
| AF                             | 0.386         | 0.003          | 0.064         | 0.631          | 0.419           | 0.001          | 0.380       | 0.004          |
| Age                            | 0.111         | 0.324          | 0.112         | 0.353          | 0.108           | 0.339          | 0.175       | 0.131          |
| Gender                         | -0.092        | 0.333          | -0.171        | 0.094          | -0.074          | 0.432          | -0.088      | 0.363          |
| BMI                            | -0.051        | 0.587          | 0.053         | 0.600          | -0.067          | 0.476          | -0.090      | 0.351          |
| TC                             | -0.064        | 0.532          | -0.126        | 0.252          | -0.049          | 0.632          | 0.009       | 0.931          |
| T2DM                           | -0.170        | 0.192          | -0.100        | 0.473          | -0.171          | 0.187          | -0.095      | 0.473          |
| HTN                            | -0.078        | 0.443          | -0.168        | 0.124          | -0.058          | 0.566          | -0.185      | 0.078          |
| RASI                           | 0.125         | 0.267          | 0.007         | 0.951          | 0.136           | 0.223          | 0.133       | 0.246          |
| Statin                         | -0.149        | 0.121          | -0.114        | 0.266          | -0.147          | 0.126          | -0.067      | 0.492          |
| Amiodarone                     | 0.199         | 0.050          | 0.377         | 0.001          | 0.153           | 0.127          | 0.091       | 0.378          |
| Metformin                      | 0.103         | 0.423          | -0.068        | 0.621          | 0.127           | 0.321          | 0.095       | 0.469          |

Abbreviations: AF: atrial fibrillation; BMI: body mass index; HTN: hypertension; DM: diabetes mellitus; TC: total cholesterol; HTN: hypertension; RASI: renin-angiotensin system inhibitor.

**Supplementary Table 5. Viral, bacterial, and CAAP-AF score for each sample.**

| <b>ID</b> | <b>Viral score</b> | <b>Bacteria score</b> | <b>CAAP-AF score</b> |
|-----------|--------------------|-----------------------|----------------------|
| no_reAF1  | -1.643436274       | -0.438057175          | 8                    |
| no_reAF2  | -0.572739537       | -0.559589758          | 4                    |
| no_reAF3  | -1.112909752       | -0.41292474           | 5                    |
| no_reAF4  | -1.720926254       | -0.480547348          | 4                    |
| no_reAF5  | -1.663225355       | -0.629424774          | 3                    |
| no_reAF6  | -1.207326045       | -0.457982056          | 2                    |
| no_reAF7  | -0.794490746       | -0.403373535          | 7                    |
| no_reAF8  | -1.449086837       | -0.924431659          | 4                    |
| no_reAF9  | -0.690488681       | -0.372348362          | 3                    |
| no_reAF10 | -1.590535439       | -0.83456788           | 5                    |
| no_reAF11 | -1.454642971       | -1.018637523          | 1                    |
| no_reAF12 | -1.38143236        | -0.522411896          | 3                    |
| no_reAF13 | -1.17920171        | -0.784698581          | 6                    |
| no_reAF14 | -0.745314246       | -0.941740217          | 7                    |
| no_reAF15 | -1.446141423       | -0.846711054          | 3                    |
| no_reAF16 | -2.376555056       | -0.406248875          | 4                    |
| no_reAF17 | -1.028053231       | -0.121126375          | 0                    |
| no_reAF18 | -0.853312857       | -1.094805179          | 2                    |
| no_reAF19 | -1.086303952       | -0.405425016          | 1                    |
| no_reAF20 | -1.390471095       | -0.474613524          | 1                    |
| no_reAF21 | -1.001423967       | -0.838099047          | 4                    |
| no_reAF22 | -1.534434775       | -0.913203781          | 3                    |
| no_reAF23 | -0.39917529        | -0.515052             | 1                    |
| reAF1     | 0.857412367        | 0.130452354           | 5                    |
| reAF2     | 0.662074237        | -0.114841987          | 2                    |
| reAF3     | 0.788297736        | -0.430826956          | 4                    |
| reAF4     | 0.808764009        | -0.072169315          | 1                    |
| reAF5     | 0.089692379        | 0.094527915           | 4                    |
| reAF6     | 1.711957888        | 0.744633894           | 8                    |
| reAF7     | 1.333083101        | -0.166743886          | 7                    |
| reAF8     | 0.539843254        | -0.285436126          | 7                    |
| reAF9     | 0.67832355         | 0.1271324             | 2                    |
| reAF10    | 1.638005186        | 0.942875207           | 4                    |
| reAF11    | 1.182311213        | -0.386605779          | 4                    |
| reAF12    | 0.194674374        | -0.160757943          | 4                    |

|        |             |              |   |
|--------|-------------|--------------|---|
| reAF13 | 1.581301599 | -0.215528759 | 6 |
| reAF14 | 0.785256346 | 0.821312269  | 5 |
| reAF15 | 0.2598357   | 0.680733825  | 6 |
| reAF16 | 0.638192391 | -0.413989751 | 7 |
| reAF17 | 0.067054588 | 0.611781801  | 8 |

Abbreviations: viral score = (-0.4191 \*(Intercept)) + (-151.9898 \*Lepidopteran hudovirus) + (-824.8187 \*Acanthocystis turfacea chlorella virus 1) + (-32.1303 \*Synechococcus phage S-RIM8) + (-36.6109660550033 \*Agrotis segetum nucleopolyhedrovirus B) + (-1001.4687 \*Mokola lyssavirus) + (1046.1101 \*Rhodococcus phage REQ1) + (564.2624 \*Chicken anemia virus) + (1061.2306 \*Escherichia virus HX01) + (1216.3961 \*Guajara orthobunyavirus) + (-879.1352 \*Escherichia virus ADB2) + (-80.5973 \*Azospirillum phage Cd) + (-3751.0734 \*Helicoverpa armigera granulovirus) + (1722.6372 \*Salmonella phage SPN3UB) + (73.0350 \*Listeria virus P100) + (112.2706 \*Beihai zhaovirus-like virus 1) + (9441.7402 \*Maize rayado fino virus) + (34369.6655 \*Ribgrass mosaic virus) + (568.4422 \*Wuhan millipede virus 3) + (2657.2776 \*Wuhan insect virus 14) + (3857.4019 \*Narcissus mosaic virus) + (1303.9541 \*Paracoccus phage vB\_PmaS-R3).
