# Supplementary material for: Alterations of gut viral signals in atrial fibrillation: complex linkage with gut bacteriome
Source: Aging (Albany NY). 2022 Aug 18;14(16):6537–53. doi: 10.18632/aging.204222 (PMC9467389; doi:10.18632/aging.204222)
Supplement: Supplementary Tables 2-4 and 6 [file aging-14-204222-s003.xlsx]

## Sheet: list
Supplementary Table 1. The association between potential confounders and viral diversity.
Supplementary Table 2. DESeq analysis of taxa.
Supplementary Table 3. Limma analysis of function (GO, Pfam and KEGG pathway).
Supplementary Table 4. Virus-bacteria co-occurrence network.
Supplementary Table 5. Viral, bacterial, and CAAP-AF score for each sample.
Supplementary Table 6. Medication history.

## Sheet: Supplementary Table 2 
Supplementary Table 2. DESeq analysis of taxa.
Family names	baseMean	log2FoldChange	lfcSE	stat	pvalue	padj		Genera names	baseMean	log2FoldChange	lfcSE	stat	pvalue	padj		Species names	baseMean	log2FoldChange	lfcSE	stat	pvalue	padj
f__Qinviridae	43.092	1.93682	0.737357	2.6267	0.00862162	0.020822		g__Yingvirus	42.1483	2.26329	0.757547	2.98766	0.00281121	0.00763161		s__Charybdis yingvirus	45.0411	2.5847	0.795554	3.24893	0.00115839	0.00323527
f__Arenaviridae	8591.48	0.484379	0.195317	2.47996	0.0131399	0.0280317		g__Mammarenavirus	5800.21	0.565863	0.186665	3.03144	0.00243392	0.00682951		s__Allpahuayo mammarenavirus	0.0239058	0.232377	1.8816	0.1235	0.901711	NA
f__Fimoviridae	177.683	-2.22564	0.310776	-7.16155	7.97707e-13	3.40355e-11		g__Reptarenavirus	2454.9	0.668029	0.340646	1.96106	0.0498717	0.0908076		s__Apore mammarenavirus	45.2319	-1.31218	0.646962	-2.02821	0.0425385	0.0752545
f__Hantaviridae	3194.1	-0.213441	0.32312	-0.660563	0.508893	0.586831		g__Emaravirus	165.229	-1.94907	0.311194	-6.26318	3.77205e-10	5.13479e-09		s__Argentinian mammarenavirus	58.5925	3.4442	0.783596	4.39538	1.10579e-05	5.27829e-05
f__Mypoviridae	1.13844	-0.920551	1.06776	-0.862132	0.388615	0.497427		g__Mobatvirus	83.0557	0.724961	0.9757	0.743016	0.457472	0.565179		s__Bear Canyon mammarenavirus	73.766	0.976599	0.370075	2.63892	0.00831705	0.0181656
f__Nairoviridae	3466.25	-0.490341	0.239902	-2.04392	0.040961	0.0749001		g__Orthohantavirus	3690.9	0.38581	0.389595	0.990284	0.322035	0.425036		s__Brazilian mammarenavirus	18.7832	0.099993	0.5737	0.174295	0.861634	0.900508
f__Peribunyaviridae	10229.7	0.631574	0.260752	2.42213	0.01543	0.0308601		g__Thottimvirus	50.5456	3.11747	0.438289	7.11281	1.13702e-12	2.59103e-11		s__Cali mammarenavirus	0.433766	1.66293	1.88099	0.884075	0.376656	0.480645
f__Phasmaviridae	2334.89	-0.44725	0.320282	-1.39643	0.162586	0.244835		g__Hubavirus	0.918226	-1.8578	1.14432	-1.6235	0.104483	0.168608		s__Cupixi mammarenavirus	95.8242	3.36584	0.828034	4.06485	4.8063e-05	0.000195934
f__Phenuiviridae	4638.74	-0.573752	0.226712	-2.53075	0.0113819	0.0257235		g__Orthonairovirus	3262.4	-0.0879416	0.253269	-0.347226	0.728421	0.806735		s__Flexal mammarenavirus	8.62809	-4.00503	1.37658	-2.90941	0.00362109	0.0087753
f__Tospoviridae	577.703	-1.79692	0.309893	-5.79851	6.69067e-09	1.07051e-07		g__Shaspivirus	146.502	-1.63564	0.346772	-4.71677	2.39618e-06	1.41884e-05		s__Latino mammarenavirus	361.728	2.86805	0.471586	6.0817	1.18912e-09	1.28647e-08
f__Amnoonviridae	5.7799	-4.217	0.716459	-5.8859	3.9589e-09	7.23913e-08		g__Striwavirus	4.19532	-2.52578	1.12407	-2.24698	0.024641	0.051047		s__Lujo mammarenavirus	200.399	-1.49704	0.374849	-3.99372	6.50433e-05	0.000257428
f__Orthomyxoviridae	54.3203	-0.428768	0.424335	-1.01044	0.312282	0.420759		g__Herbevirus	297.464	-1.41356	0.410247	-3.44563	0.000569731	0.00203903		s__Luna mammarenavirus	746.005	1.05048	0.488716	2.14947	0.0315974	0.0585694
f__Chuviridae	63.7231	-2.33601	0.349697	-6.68011	2.38767e-11	7.64055e-10		g__Orthobunyavirus	7714.18	1.55532	0.309329	5.02803	4.95537e-07	3.48265e-06		s__Lunk mammarenavirus	804.878	1.39403	0.313625	4.4449	8.79329e-06	4.24362e-05
f__Bornaviridae	618.401	1.21264	0.435291	2.7858	0.0053395	0.0134011		g__Shangavirus	144.143	-1.42505	0.555395	-2.56584	0.0102927	0.0232003		s__Lymphocytic choriomeningitis mammarenavirus	49.018	-0.295231	0.456709	-0.646431	0.518	0.612762
f__Filoviridae	415.55	-1.00293	0.246352	-4.07111	4.67894e-05	0.000249544		g__Tospovirus	2546.52	0.0337794	0.403464	0.0837234	0.933276	0.958776		s__Machupo mammarenavirus	1955.04	0.727147	0.476049	1.52746	0.126646	0.193833
f__Nyamiviridae	181.879	-1.13128	0.463653	-2.43993	0.0146901	0.0300366		g__Jonvirus	123.104	2.11843	0.492956	4.29741	1.72808e-05	8.60606e-05		s__Mobala mammarenavirus	1.60921	1.82369	0.733011	2.48794	0.0128484	0.026602
f__Paramyxoviridae	12471.7	-0.206551	0.132296	-1.56128	0.118457	0.187191		g__Orthophasmavirus	2275.78	-0.517191	0.37008	-1.39751	0.16226	0.243066		s__Okahandja mammarenavirus	3.44811	2.19571	0.6197	3.54317	0.000395341	0.00125049
f__Pneumoviridae	810.018	-0.291853	0.327875	-0.890135	0.373394	0.482771		g__Banyangvirus	39.4988	-1.57302	0.562332	-2.79732	0.0051529	0.0130033		s__Oliveros mammarenavirus	1.74644	-0.34803	0.918225	-0.379024	0.70467	0.775353
f__Rhabdoviridae	20335.1	0.27426	0.189034	1.45085	0.146821	0.223727		g__Beidivirus	478.727	-2.21883	0.417808	-5.31065	1.09232e-07	9.12696e-07		s__Souris mammarenavirus	1061.98	-0.288974	0.258042	-1.11987	0.262769	0.358225
f__Sunviridae	3.70244	-0.973108	0.993934	-0.979047	0.327557	0.43224		g__Goukovirus	33.0229	-0.147011	0.477434	-0.307918	0.758144	0.833149		s__Tacaribe mammarenavirus	2.7017	-0.202279	0.731447	-0.276546	0.782129	0.836746
f__Xinmoviridae	103.252	-2.06804	0.580782	-3.56079	0.000369747	0.00135222		g__Hudivirus	35.3965	-2.09021	0.562227	-3.71773	0.00020102	0.000791451		s__Tamiami mammarenavirus	146.753	-3.40337	0.383404	-8.87672	6.88613e-19	3.34785e-17
f__Yueviridae	14.5327	1.19881	0.589949	2.03206	0.0421473	0.0759839		g__Hudovirus	663.322	-0.359725	0.319476	-1.12598	0.260172	0.356374		s__Alethinophid 2 reptarenavirus	25.9302	-5.49344	0.51331	-10.702	9.96199e-27	1.6346e-24
f__Ackermannviridae	23335.5	1.19843	0.264157	4.53682	5.71091e-06	4.29998e-05		g__Kabutovirus	1.21007	0.669366	1.18029	0.56712	0.570633	0.67471		s__California reptarenavirus	28.752	5.4364	0.646847	8.40446	4.29841e-17	1.5969e-15
f__Herelleviridae	118010	0.557805	0.166053	3.35919	0.000781711	0.00256562		g__Phasivirus	317.297	1.03741	0.670278	1.54773	0.121688	0.191038		s__Giessen reptarenavirus	2135.86	0.804484	0.383017	2.10039	0.035695	0.0647475
f__Myoviridae	1.14749e+06	0.19255	0.173795	1.10791	0.267899	0.373908		g__Phlebovirus	2443.87	-0.638868	0.250386	-2.55153	0.010725	0.0238616		s__Rotterdam reptarenavirus	111.126	-1.2144	0.900544	-1.34852	0.177493	0.257257
f__Podoviridae	215206	-0.0339084	0.199093	-0.170314	0.864763	0.88838		g__Tenuivirus	37.7315	0.597019	0.611132	0.976908	0.328615	0.432781		s__Wenling frogfish arenavirus 1	1.2256	2.00903	1.83847	1.09277	0.274494	0.371484
f__Siphoviridae	690029	-0.190356	0.17472	-1.08949	0.275936	0.379783		g__Wubeivirus	1.09901	-1.69348	1.10331	-1.53491	0.124806	0.194718		s__Wenling frogfish arenavirus 2	78.3631	2.3627	0.481094	4.9111	9.05667e-07	5.47012e-06
f__Alloherpesviridae	20428.5	0.0702798	0.143094	0.491144	0.623324	0.693787		g__Orthotospovirus	435.117	-1.18233	0.285816	-4.13667	3.5238e-05	0.000161579		s__Actinidia chlorotic ringspot-associated emaravirus	29.1949	1.8744	0.440076	4.25925	2.05112e-05	9.21017e-05
f__Herpesviridae	139104	0.148234	0.161328	0.918833	0.358183	0.467831		g__Tilapinevirus	6.44542	-4.49541	0.727975	-6.17523	6.60681e-10	8.56608e-09		s__High Plains wheat mosaic emaravirus	1.59557	-3.19846	1.14981	-2.78172	0.00540714	0.0124232
f__Malacoherpesviridae	3746.95	0.590174	0.20974	2.81383	0.00489548	0.0127882		g__Alphainfluenzavirus	29.5669	-1.01058	0.49178	-2.05494	0.0398844	0.0755492		s__Raspberry leaf blotch emaravirus	113.978	-4.08439	0.384805	-10.6142	2.56067e-26	3.6014e-24
f__Lipothrixviridae	727.425	-0.596932	0.338701	-1.76241	0.0779994	0.131367		g__Betainfluenzavirus	4.78178	-0.848056	0.736607	-1.1513	0.249609	0.34632		s__Rose rosette emaravirus	4.52941	-2.79236	0.928035	-3.00889	0.002622	0.00659773
f__Rudiviridae	5850.75	-0.856914	0.216553	-3.95706	7.58789e-05	0.000346875		g__Isavirus	0.0158152	0.197	1.37953	0.142802	0.886446	0.929138		s__Laibin mobatvirus	88.3996	0.948221	1.08939	0.870411	0.384076	0.487743
f__Arteriviridae	2794.22	-1.39462	0.270918	-5.14776	2.63622e-07	2.89329e-06		g__Quaranjavirus	13.3217	2.43023	0.804846	3.0195	0.00253194	0.00702323		s__Andes orthohantavirus	0.353371	-1.04183	1.73257	-0.601323	0.547625	0.640536
f__Coronaviridae	10554.3	0.684666	0.262014	2.61309	0.00897275	0.0212687		g__Mivirus	59.6039	-2.13877	0.346738	-6.16826	6.90439e-10	8.80017e-09		s__Bayou orthohantavirus	116.592	-2.36944	0.493086	-4.80534	1.54489e-06	8.75364e-06
f__Euroniviridae	1011.49	0.804102	0.266651	3.01556	0.00256508	0.00746205		g__Carbovirus	219.042	2.23009	0.535957	4.16095	3.1692e-05	0.000147113		s__Bowe orthohantavirus	1.31291	-2.32626	0.784845	-2.96398	0.0030369	0.00750742
f__Mesoniviridae	3554.74	0.799973	0.301925	2.64957	0.00805941	0.0198385		g__Orthobornavirus	369.063	0.992719	0.466711	2.12705	0.0334156	0.0650997		s__Cano Delgadito orthohantavirus	2.69798	4.82176	0.603269	7.99273	1.31988e-15	3.68629e-14
f__Mononiviridae	680.548	1.33229	0.432609	3.07967	0.0020723	0.00631559		g__Cuevavirus	9.93539	-2.38829	0.819031	-2.91599	0.00354563	0.00925803		s__El Moro Canyon orthohantavirus	13.3722	1.66812	0.648032	2.57414	0.010049	0.0214806
f__Roniviridae	241.253	2.07746	0.470231	4.41796	9.96388e-06	6.71251e-05		g__Ebolavirus	183.825	-0.756243	0.308296	-2.45297	0.014168	0.030972		s__Fugong orthohantavirus	29.5339	-0.266672	0.642522	-0.41504	0.678113	0.753496
f__Tobaniviridae	1257.48	-1.00028	0.252069	-3.96828	7.23918e-05	0.000343191		g__Marburgvirus	173.369	-0.366031	0.331098	-1.10551	0.268939	0.365058		s__Hantaan orthohantavirus	1.31423	-1.22579	1.46293	-0.837896	0.402089	0.505919
f__Caulimoviridae	23594.9	1.19818	0.148717	8.05681	7.83135e-16	1.00241e-13		g__Berhavirus	3.03949	-1.34774	0.858547	-1.56979	0.116464	0.183223		s__Hantavirus Z10	28.7721	-1.85746	0.64088	-2.89829	0.00375205	0.00905365
f__Retroviridae	2183.27	0.367583	0.240922	1.52574	0.127076	0.198362		g__Nyavirus	21.4799	1.7625	0.643762	2.73781	0.00618499	0.015101		s__Jeju orthohantavirus	1258.55	0.640617	1.02901	0.622557	0.533576	0.627605
f__Dicistroviridae	1608.03	0.636769	0.34346	1.85399	0.0637412	0.108785		g__Socyvirus	134.513	-1.93006	0.601497	-3.20877	0.00133306	0.00409167		s__Kenkeme orthohantavirus	8.1381	-4.2917	0.663733	-6.466	1.00629e-10	1.31217e-09
f__Iflaviridae	3414.56	-0.744958	0.305606	-2.43764	0.0147836	0.0300366		g__Tapwovirus	1.08413	-1.95838	0.875503	-2.23687	0.0252951	0.0519725		s__Khabarovsk orthohantavirus	15.6292	0.38595	0.405443	0.951921	0.341137	0.444245
f__Marnaviridae	1128.91	-1.07736	0.426088	-2.5285	0.011455	0.0257235		g__Avulavirus	2271.82	0.090895	0.300694	0.302284	0.762436	0.83336		s__Laguna Negra orthohantavirus	1.02632	0.996052	1.22272	0.814617	0.415292	0.519345
f__Picornaviridae	45241.4	0.763483	0.272509	2.80168	0.00508374	0.0130144		g__Ferlavirus	10.2766	-1.67502	0.782847	-2.13965	0.0323828	0.0640914		s__Luxi orthohantavirus	1.21394	-2.93093	0.90729	-3.23042	0.00123607	0.0034207
f__Polycipiviridae	204.497	0.863651	0.493735	1.74922	0.0802532	0.133408		g__Henipavirus	152.876	0.776779	0.415312	1.87035	0.061435	0.107942		s__Puumala orthohantavirus	0	0	0	0	1	NA
f__Secoviridae	20758.6	2.6455	0.425841	6.21242	5.21734e-10	1.11303e-08		g__Jeilongvirus	2181.66	2.54797	0.60122	4.23799	2.25527e-05	0.000108716		s__Seoul orthohantavirus	38.2712	-2.54249	0.775995	-3.27642	0.00105131	0.00295718
f__Alphaflexiviridae	9188.39	-0.172294	0.21296	-0.809041	0.418491	0.527958		g__Morbillivirus	1674.42	-2.36717	0.316758	-7.47311	7.83237e-14	2.18146e-12		s__Sin Nombre orthohantavirus	33.29	-1.91682	0.570995	-3.35699	0.000787962	0.00228834
f__Betaflexiviridae	16942.4	0.633254	0.264335	2.39565	0.0165908	0.0326712		g__Narmovirus	37.3601	-2.54198	0.487203	-5.2175	1.81357e-07	1.45086e-06		s__Tula orthohantavirus	749.998	2.1558	0.442296	4.87411	1.09301e-06	6.4532e-06
f__Tymoviridae	4794.7	0.661347	0.292938	2.25764	0.0239684	0.0457904		g__Orthoavulavirus	490.847	0.13761	0.380649	0.361514	0.717715	0.798405		s__Imjin thottimvirus	23.6881	3.24195	0.443235	7.31429	2.58751e-13	5.09481e-12
f__Adenoviridae	20102.1	0.21349	0.181905	1.17363	0.240542	0.342104		g__Pararubulavirus	2291.77	0.0399266	0.285168	0.140011	0.888651	0.929138		s__Thottopalayam thottimvirus	17.0823	3.10562	0.853527	3.63857	0.000274159	0.000905737
f__Adomaviridae	9.1855	-2.17062	0.884251	-2.45475	0.0140981	0.0295829		g__Respirovirus	634.492	-1.79276	0.344586	-5.20266	1.96456e-07	1.53891e-06		s__Myriapod hubavirus	0.866314	-2.04979	1.19197	-1.71966	0.0854935	0.138892
f__Alphasatellitidae	890.506	-0.265559	0.248129	-1.07025	0.284508	0.387416		g__Rubulavirus	1801.45	0.866243	0.30742	2.81779	0.0048356	0.0122437		s__Burana orthonairovirus	1781.71	-0.98273	0.306853	-3.2026	0.00136191	0.00371929
f__Alphatetraviridae	162.579	1.32138	0.329276	4.01299	5.99533e-05	0.000295155		g__Salemvirus	260.115	-2.39853	0.370332	-6.47669	9.3754e-11	1.63961e-09		s__Dera Ghazi Khan orthonairovirus	180.521	-1.11607	0.368311	-3.03025	0.00244354	0.00621619
f__Amalgaviridae	246.391	0.586559	0.228442	2.56764	0.0102392	0.0238294		g__Metapneumovirus	41.0034	-1.80454	0.850395	-2.122	0.033838	0.0657524		s__Hazara orthonairovirus	223.392	3.22341	0.568065	5.67437	1.39202e-08	1.22635e-07
f__Ampullaviridae	2600.96	2.3622	0.799989	2.95279	0.00314911	0.00857631		g__Orthopneumovirus	275.423	-0.317868	0.370137	-0.858784	0.39046	0.501924		s__Hughes orthonairovirus	446.161	3.89355	0.589826	6.60118	4.07897e-11	5.57742e-10
f__Anelloviridae	4018.88	-1.15274	0.301793	-3.81964	0.000133645	0.000570221		g__Almendravirus	54.6471	0.418245	0.526461	0.794447	0.426935	0.536882		s__Nairobi sheep disease orthonairovirus	156.358	0.869115	0.800962	1.08509	0.277883	0.375275
f__Ascoviridae	2837.6	0.30387	0.233764	1.2999	0.193635	0.284889		g__Alphanemrhavirus	5.68123	-2.66877	1.19022	-2.24226	0.0249448	0.0515342		s__Qalyub orthonairovirus	54.2285	-2.5159	0.462372	-5.4413	5.28927e-08	4.12458e-07
f__Asfarviridae	1308.23	1.367	0.330262	4.13914	3.48614e-05	0.000194698		g__Curiovirus	223.948	-1.21693	0.303651	-4.00765	6.13255e-05	0.000266571		s__Sakhalin orthonairovirus	43.7051	-1.46884	0.541386	-2.7131	0.00666565	0.0149569
f__Astroviridae	1534.48	-1.48958	0.387108	-3.84797	0.000119101	0.000525687		g__Cytorhabdovirus	557.38	-2.68487	0.332387	-8.07755	6.60815e-16	3.54952e-14		s__Yogue virus	79.8178	1.02473	0.51893	1.9747	0.0483022	0.084054
f__Bacilladnaviridae	373.625	-1.54234	0.322796	-4.77807	1.76982e-06	1.57339e-05		g__Dichorhavirus	23.9385	-1.56831	0.624123	-2.51282	0.0119771	0.0264129		s__Spider shaspivirus	140.735	-1.6895	0.345426	-4.89107	1.00291e-06	5.96767e-06
f__Baculoviridae	93222.4	0.0935025	0.122703	0.762026	0.446044	0.528645		g__Ephemerovirus	1184.54	-0.0603724	0.274239	-0.220145	0.825758	0.883315		s__Strider striwavirus	3.88274	-2.70622	1.22443	-2.21018	0.0270925	0.0514604
f__Benyviridae	323.148	1.68734	0.364484	4.6294	3.66726e-06	2.93381e-05		g__Hapavirus	745.564	-0.312008	0.358865	-0.86943	0.384612	0.496103		s__Herbert herbevirus	33.2446	-5.69246	0.612988	-9.28642	1.59563e-20	1.01348e-18
f__Bicaudaviridae	2234.07	1.39851	0.346512	4.03596	5.43791e-05	0.000278421		g__Ledantevirus	1835.23	0.0228862	0.330804	0.0691835	0.944844	0.965384		s__Kibale herbevirus	162.246	-1.23218	0.385259	-3.1983	0.0013824	0.0037674
f__Bidnaviridae	2.06067	-0.69482	1.11258	-0.624513	0.532291	0.603779		g__Lyssavirus	556.029	1.05493	0.24832	4.24828	2.1542e-05	0.000104513		s__Tai herbevirus	0.343576	-0.96524	1.54562	-0.624498	0.5323	0.626479
f__Birnaviridae	25.5144	-0.197473	0.74754	-0.264164	0.791654	0.827853		g__Novirhabdovirus	42.5698	1.35537	0.493395	2.74703	0.00601375	0.0148273		s__Aino orthobunyavirus	5.99182	3.68689	0.907661	4.06197	4.86598e-05	0.000197549
f__Botourmiaviridae	16.1173	-2.36587	0.531589	-4.45056	8.5648e-06	6.09052e-05		g__Nucleorhabdovirus	4171.14	0.410557	0.311539	1.31783	0.187559	0.273873		s__Akabane orthobunyavirus	5.40746	-0.901019	0.906578	-0.993869	0.320287	0.421272
f__Bromoviridae	5386.76	1.53368	0.298026	5.14615	2.65887e-07	2.89329e-06		g__Perhabdovirus	66.7457	3.20717	0.614947	5.21536	1.83463e-07	1.45226e-06		s__Bimiti orthobunyavirus	108.519	-0.674662	0.581747	-1.15972	0.246163	0.340018
f__Caliciviridae	4484.1	1.19695	0.350107	3.4188	0.000628981	0.00220602		g__Sigmavirus	674.112	-0.702733	0.329592	-2.13213	0.0329961	0.0646174		s__Bwamba orthobunyavirus	48.6073	1.49874	0.349956	4.28267	1.84668e-05	8.3685e-05
f__Chrysoviridae	1321.91	-1.03097	0.276831	-3.72419	0.000195942	0.000787858		g__Sprivivirus	428.076	1.18305	0.334958	3.53192	0.000412548	0.00153582		s__California encephalitis orthobunyavirus	22.8409	-2.36799	1.62592	-1.4564	0.145282	0.217867
f__Circoviridae	5236.68	-0.162522	0.211053	-0.770052	0.441269	0.527958		g__Sripuvirus	2325.29	0.812971	0.296697	2.74008	0.0061425	0.0150461		s__Capim orthobunyavirus	2819.64	2.9852	0.661706	4.51137	6.44102e-06	3.20904e-05
f__Closteroviridae	7110.63	1.2633	0.345383	3.65768	0.000254509	0.00095815		g__Tibrovirus	71.2599	-1.20054	0.384424	-3.12296	0.00179043	0.00528001		s__Caraparu orthobunyavirus	1541.5	2.1723	0.476187	4.56187	5.07007e-06	2.57958e-05
f__Cystoviridae	2.44782	0.762842	1.0764	0.708699	0.478511	0.561922		g__Tupavirus	30.3725	-2.62421	1.01788	-2.57811	0.00993433	0.0225337		s__Guajara orthobunyavirus	11.2997	0.441569	0.605268	0.729544	0.465669	0.565466
f__Endornaviridae	6702.2	-0.755965	0.222317	-3.40039	0.000672893	0.00226659		g__Varicosavirus	5.88527	-2.97528	0.723668	-4.11138	3.93293e-05	0.000176046		s__Guama orthobunyavirus	139.794	-5.09201	0.487815	-10.4384	1.65591e-25	2.03781e-23
f__Flaviviridae	5933.76	-0.446218	0.178088	-2.5056	0.0122243	0.0269777		g__Vesiculovirus	969.606	-0.0557177	0.210584	-0.264587	0.791328	0.853771		s__Kaeng Khoi orthobunyavirus	84.2761	-0.349632	0.538902	-0.648786	0.516477	0.611327
f__Fusariviridae	24.6884	-0.748471	0.545247	-1.37272	0.169839	0.252784		g__Sunshinevirus	4.01889	-1.14617	1.05954	-1.08176	0.279358	0.377158		s__Kairi orthobunyavirus	2.95136	-3.82643	1.22756	-3.1171	0.00182638	0.00480127
f__Fuselloviridae	551.413	1.37013	0.468627	2.92372	0.00345875	0.00922333		g__Chengtivirus	14.6652	1.58768	0.458537	3.4625	0.000535183	0.00193489		s__Madrid orthobunyavirus	230.332	2.3013	0.447315	5.1447	2.67949e-07	1.80065e-06
f__Geminiviridae	5307.48	-0.363676	0.177762	-2.04586	0.0407699	0.0749001		g__Anphevirus	93.0041	-1.98639	0.587969	-3.37838	0.000729129	0.00253845		s__Main Drain orthobunyavirus	5.00182	-4.18853	0.471304	-8.88711	6.27213e-19	3.12654e-17
f__Genomoviridae	1016.48	0.9379	0.305329	3.07177	0.00212797	0.00633442		g__Yuyuevirus	13.4567	1.379	0.580092	2.37721	0.0174442	0.0371616		s__Marituba orthobunyavirus	17.2244	0.468456	0.38581	1.21421	0.224667	0.314966
f__Globuloviridae	1.24538	-1.33958	1.11234	-1.20429	0.228476	0.328595		g__Agtrevirus	1482.9	-0.454673	0.279386	-1.6274	0.103652	0.167988		s__Murrumbidgee virus	0.023912	0.306899	1.8816	0.163106	0.870435	NA
f__Hepadnaviridae	565.199	-0.124039	0.336941	-0.368133	0.712774	0.773178		g__Kuttervirus	988.244	-0.196225	0.269502	-0.728103	0.466551	0.574216		s__Nyando orthobunyavirus	38.8241	-4.59362	0.516556	-8.89278	5.96003e-19	3.00905e-17
f__Hepeviridae	124.233	1.43818	0.483562	2.97413	0.00293823	0.00817594		g__Limestonevirus	15344.9	3.7109	0.450799	8.23182	1.84386e-16	1.15548e-14		s__Oriboca orthobunyavirus	84.8888	-1.38811	0.458869	-3.02506	0.00248584	0.00630344
f__Hypoviridae	1281.11	-0.135651	0.22694	-0.59774	0.550014	0.617559		g__Agatevirus	26239.7	0.195592	0.188392	1.03821	0.29917	0.400313		s__Oropouche orthobunyavirus	190.531	-0.615983	0.405407	-1.51942	0.128658	0.196301
f__Hytrosaviridae	1525.12	0.219426	0.219053	1.0017	0.316487	0.421983		g__Bastillevirus	2081.42	0.91963	0.27337	3.36404	0.000768098	0.00263749		s__Sathuperi orthobunyavirus	48.1664	0.957757	0.737512	1.29863	0.19407	0.278212
f__Inoviridae	3194.58	-1.73836	0.338044	-5.1424	2.71246e-07	2.89329e-06		g__Caeruleovirus	34704.2	3.27956	0.371687	8.82343	1.11004e-18	9.27498e-17		s__Shamonda orthobunyavirus	21.7715	-0.376371	0.488242	-0.77087	0.440784	0.542772
f__Iridoviridae	34975	-0.0875059	0.254753	-0.343493	0.731228	0.78653		g__Kayvirus	1907.81	0.00177248	0.264248	0.00670765	0.994648	0.997301		s__Simbu orthobunyavirus	366.345	6.10996	0.60379	10.1193	4.53477e-24	4.57895e-22
f__Kitaviridae	43.3356	-0.683898	0.872944	-0.783438	0.43337	0.527958		g__Kochikohdavirus	1228.35	0.162516	0.267223	0.608166	0.543078	0.645922		s__Wyeomyia orthobunyavirus	1.54574	-2.16792	1.69976	-1.27543	0.202159	0.288618
f__Lavidaviridae	34.4774	-0.295814	0.651522	-0.454035	0.649803	0.717024		g__Okubovirus	1726	-0.979531	0.272307	-3.59715	0.000321718	0.00122808		s__Insect shangavirus	149.184	-1.33511	0.578668	-2.30722	0.0210426	0.0409012
f__Leviviridae	49.7655	-1.00442	0.335407	-2.99463	0.00274777	0.00781587		g__Pecentumvirus	2996.95	0.620191	0.330008	1.87932	0.0602007	0.106021		s__Alstroemeria yellow spot virus	762.59	-3.92483	0.539069	-7.28075	3.31971e-13	6.40834e-12
f__Luteoviridae	3873.79	0.4677	0.236961	1.97374	0.0484111	0.0860642		g__Silviavirus	2539.17	0.591242	0.279365	2.11638	0.0343124	0.0665025		s__Calla lily chlorotic spot virus	0	0	0	0	1	NA
f__Marseilleviridae	44924.8	1.10179	0.141888	7.76518	8.15291e-15	5.21786e-13		g__Tsarbombavirus	2175.69	-0.797203	0.302769	-2.63304	0.00846244	0.019752		s__Melon severe mosaic tospovirus	9.80144	0.053959	0.761594	0.07085	0.943517	0.960096
f__Matonaviridae	101.418	-2.15963	0.45277	-4.76983	1.84382e-06	1.57339e-05		g__Twortvirus	702.655	-0.341776	0.314319	-1.08736	0.27688	0.374485		s__Melon yellow spot virus	200.176	1.47069	0.380037	3.86985	0.000108901	0.000407655
f__Megabirnaviridae	862.431	-1.9007	0.434862	-4.3708	1.2379e-05	7.92258e-05		g__Wphvirus	11467.5	-0.243044	0.217527	-1.1173	0.263864	0.359468		s__Pepper chlorotic spot virus	64.3576	3.61246	0.474961	7.60581	2.83117e-14	6.26357e-13
f__Microviridae	9662.38	-0.398418	0.308782	-1.29029	0.19695	0.286473		g__Abouovirus	28.0059	-1.07182	0.500943	-2.13961	0.0323866	0.0640914		s__Tomato zonate spot virus	3.67305	-1.37809	0.841681	-1.6373	0.101567	0.160502
f__Mimiviridae	41725	-0.237309	0.147604	-1.60774	0.107893	0.174814		g__Agricanvirus	2929.03	1.17257	0.334731	3.503	0.000460045	0.00167752		s__Tospovirus kiwifruit/YXW/2014	1243.24	2.0934	0.994079	2.10587	0.0352158	0.0640366
f__Nanoviridae	395.753	1.51248	0.365482	4.13833	3.49849e-05	0.000194698		g__Alcyoneusvirus	7381.75	0.15291	0.174369	0.876934	0.380523	0.492518		s__Maprik virus	390.936	-1.29048	0.338021	-3.81774	0.000134679	0.000485238
f__Narnaviridae	647.108	-0.0365835	0.231759	-0.157852	0.874574	0.888456		g__Asteriusvirus	6167.54	-0.55716	0.228302	-2.44045	0.0146688	0.0318814		s__Mulberry vein banding virus	9.31921	2.5892	0.832611	3.10973	0.00187258	0.00491616
f__Nimaviridae	1916.42	-0.711737	0.217727	-3.26894	0.00107952	0.00345446		g__Avunavirus	1176.67	0.242432	0.291549	0.831532	0.405673	0.516186		s__Wenzhou Shrimp Virus 1	0.827084	-2.17913	1.69282	-1.28728	0.197998	0.28343
f__Nodaviridae	88.4465	0.0310364	0.602745	0.0514918	0.958934	0.966484		g__Bcepmuvirus	308.724	1.12313	0.471861	2.38022	0.0173024	0.0369642		s__Wenzhou Tick Virus	29.7534	2.36127	0.341544	6.91353	4.72744e-12	7.50671e-11
f__Nudiviridae	6560.7	-0.708821	0.192467	-3.68281	0.000230673	0.000894732		g__Bequatrovirus	2203.82	0.510407	0.287004	1.7784	0.0753384	0.127888		s__Jonchet jonvirus	126.65	2.23845	0.508064	4.40584	1.05373e-05	5.04204e-05
f__Papillomaviridae	11149.2	0.259739	0.173605	1.49615	0.134615	0.2076		g__Biquartavirus	1414.73	0.111191	0.238517	0.466178	0.641088	0.731575		s__Kigluaik phantom orthophasmavirus	2114.09	-0.53965	0.389172	-1.38666	0.165544	0.242798
f__Partitiviridae	1502.91	-0.477085	0.28291	-1.68635	0.0917289	0.15053		g__Bixzunavirus	16318.1	0.0608125	0.205278	0.296244	0.767044	0.836868		s__Wuhan mosquito orthophasmavirus 1	13.9872	-0.290671	0.715822	-0.406066	0.684694	0.758247
f__Parvoviridae	13009.8	0.112198	0.280285	0.400301	0.688935	0.753707		g__Brunovirus	592.728	-2.07927	0.496937	-4.18418	2.86202e-05	0.000135361		s__Heartland banyangvirus	37.4582	-1.54104	0.571202	-2.69789	0.00697798	0.015569
f__Permutotetraviridae	20.3722	1.68368	0.894502	1.88225	0.0598018	0.103441		g__Certrevirus	3774.5	0.134975	0.20442	0.660284	0.509072	0.615469		s__Dipteran beidivirus	459.525	-2.29957	0.421198	-5.45958	4.77254e-08	3.77395e-07
f__Phycodnaviridae	101355	0.020195	0.121102	0.16676	0.867559	0.88838		g__Chiangmaivirus	6797.57	-0.342355	0.339665	-1.00792	0.313493	0.417251		s__Yichang insect goukovirus	32.5346	-0.0681728	0.483564	-0.14098	0.887886	0.919646
f__Picobirnaviridae	224.304	1.00989	0.453183	2.22843	0.0258521	0.0486627		g__Dhakavirus	5321.16	0.469859	0.206586	2.27439	0.0229424	0.0477914		s__Dipteran hudivirus	34.8265	-2.05135	0.576384	-3.559	0.000372273	0.00118609
f__Pithoviridae	13237.9	-0.548912	0.232292	-2.36302	0.0181266	0.0351545		g__Elvirus	1282.3	0.0339474	0.298828	0.113602	0.909553	0.943426		s__Lepidopteran hudovirus	636.175	-0.32166	0.319699	-1.00613	0.314351	0.415407
f__Pleolipoviridae	47.7433	-0.122105	0.426286	-0.286439	0.774542	0.81935		g__Emdodecavirus	476.122	0.365725	0.310293	1.17864	0.23854	0.334045		s__Kabuto mountain kabutovirus	1.25985	1.05932	1.26786	0.835518	0.403426	0.507246
f__Polydnaviridae	10532	-0.167771	0.213611	-0.785405	0.432216	0.527958		g__Eneladusvirus	5247.27	-0.838231	0.256411	-3.26909	0.00107895	0.00345263		s__Phasi Charoen-like phasivirus	337.491	1.36908	0.703352	1.94651	0.0515941	0.0889959
f__Polyomaviridae	2658.66	-1.01729	0.239103	-4.2546	2.09425e-05	0.000127649		g__Erskinevirus	42228.1	-0.754615	0.229951	-3.28163	0.00103209	0.00334541		s__Aguacate virus	501.733	-1.48359	0.302637	-4.9022	9.47692e-07	5.68904e-06
f__Portogloboviridae	0.170157	0.278252	1.07368	0.259156	0.795515	0.827853		g__Felixounavirus	2677.78	-0.816422	0.31021	-2.63183	0.00849253	0.019752		s__Anhanga virus	64.6949	-3.21852	0.311616	-10.3285	5.23904e-25	5.73092e-23
f__Pospiviroidae	0.865026	0.82729	1.0745	0.769933	0.44134	0.527958		g__Ficleduovirus	1164.28	-1.24443	0.410692	-3.03009	0.00244483	0.00683462		s__Arrabida virus	93.4382	0.261729	0.198203	1.32051	0.186665	0.26877
f__Potyviridae	20485.4	1.6619	0.266119	6.24497	4.23879e-10	1.08513e-08		g__Firehammervirus	2798.6	-0.155665	0.224351	-0.693847	0.487778	0.597409		s__Arumowot virus	47.764	-4.20554	0.745362	-5.64228	1.67814e-08	1.46206e-07
f__Poxviridae	68166.1	0.0959182	0.123904	0.774132	0.438853	0.527958		g__Flaumdravirus	60.9144	-1.64663	0.385395	-4.27259	1.93215e-05	9.55906e-05		s__Huangpi Tick Virus 2	55.416	-2.73879	0.486048	-5.63481	1.75249e-08	1.50684e-07
f__Quadriviridae	72.9627	-0.608115	0.383411	-1.58607	0.112724	0.180359		g__Fletchervirus	1344.31	-0.279298	0.316769	-0.88171	0.377934	0.490857		s__Razdan virus	31.5827	0.51715	1.03776	0.498332	0.61825	0.702849
f__Reoviridae	15784.1	-0.694535	0.215892	-3.21705	0.00129517	0.00404345		g__Gaprivervirus	10311.3	0.256598	0.116556	2.2015	0.0277008	0.0562999		s__Salehabad phlebovirus	121.758	-3.30075	0.336394	-9.81213	9.98411e-23	8.19113e-21
f__Smacoviridae	775.708	1.27062	0.225482	5.63513	1.74922e-08	2.48779e-07		g__Gelderlandvirus	33235.2	1.01369	0.210274	4.82082	1.42968e-06	9.03459e-06		s__Toros virus	9.19078	-0.566453	0.494923	-1.14453	0.252405	0.346082
f__Solemoviridae	372.88	-0.000695272	0.372876	-0.00186462	0.998512	0.998512		g__Gofduovirus	114.487	-2.77748	0.441417	-6.2922	3.13004e-10	4.44112e-09		s__Uukuniemi phlebovirus	1047.66	-0.424453	0.379982	-1.11703	0.26398	0.359458
f__Solinviviridae	25.5485	-1.65301	0.484036	-3.41506	0.000637678	0.00220602		g__Hapunavirus	2845.73	0.197197	0.309152	0.637865	0.523562	0.627974		s__Zerdali virus	47.2209	-1.71205	0.618534	-2.76791	0.00564173	0.0129244
f__Sphaerolipoviridae	4855.8	0.110277	0.176898	0.623397	0.533024	0.603779		g__Hpunavirus	12055.6	2.36933	0.393977	6.01388	1.81133e-09	2.19696e-08		s__Echinochloa hoja blanca tenuivirus	3.53729	2.41213	1.65342	1.45888	0.144598	0.217008
f__Tectiviridae	123.713	0.998908	0.510393	1.95714	0.0503315	0.0882526		g__Iapetusvirus	1417.44	-0.602541	0.328685	-1.83319	0.0667745	0.115171		s__Iranian wheat stripe tenuivirus	0.233178	-0.773773	1.8811	-0.41134	0.680823	0.755447
f__Togaviridae	1735.68	-1.02727	0.275934	-3.72288	0.000196964	0.000787858		g__Jedunavirus	109.856	2.28179	0.455617	5.00813	5.49609e-07	3.8197e-06		s__Melon chlorotic spot virus	1.88901	0.400377	0.80511	0.497294	0.618981	0.703309
f__Tolecusatellitidae	599.985	-0.588403	0.236266	-2.49043	0.0127589	0.0276802		g__Jiaodavirus	3169.36	0.465925	0.260491	1.78864	0.0736729	0.125344		s__Rice grassy stunt tenuivirus	14.5125	2.27199	0.834357	2.72305	0.0064683	0.0145972
f__Tombusviridae	2460.16	0.980825	0.20037	4.89508	9.8265e-07	9.67532e-06		g__Jilinvirus	1681.01	-0.158345	0.339348	-0.466617	0.640774	0.731575		s__Rice stripe tenuivirus	5.68726	2.35122	1.05164	2.23575	0.0253679	0.0484006
f__Totiviridae	1806.1	0.20278	0.257198	0.788423	0.430449	0.527958		g__Jimmervirus	24.3073	-0.857926	0.720709	-1.19039	0.233893	0.329377		s__Fly wubeivirus	0.812079	-2.22112	1.15651	-1.92055	0.0547888	0.0937673
f__Tristromaviridae	1.84176	-1.20409	1.08874	-1.10595	0.268746	0.373908		g__Karamvirus	7835.82	0.596511	0.199678	2.98737	0.00281393	0.00763161		s__Capsicum chlorosis orthotospovirus	0.339809	-0.30468	1.88101	-0.161976	0.871324	0.908466
f__Turriviridae	1.18199	0.311144	1.07512	0.289403	0.772273	0.81935		g__Kleczkowskavirus	554.82	-0.925425	0.272061	-3.40154	0.000670071	0.00234369		s__Groundnut bud necrosis tospovirus	44.2462	-3.65932	0.847961	-4.31543	1.59289e-05	7.3711e-05
f__Virgaviridae	3985.46	-0.185711	0.267044	-0.695435	0.486783	0.566438		g__Kolesnikvirus	451.597	0.0776402	0.358349	0.216661	0.828473	0.883809		s__Impatiens necrotic spot tospovirus	19.6967	-0.513505	0.711502	-0.721719	0.470467	0.569011
								g__Krischvirus	777.143	-0.0184891	0.22622	-0.0817308	0.934861	0.959093		s__Iris yellow spot tospovirus	7.59132	2.06068	0.729395	2.8252	0.00472517	0.0110826
								g__Lubbockvirus	1725.83	-0.177863	0.259426	-0.685602	0.492964	0.600847		s__Polygonum ringspot tospovirus	1.21378	2.58238	1.28589	2.00824	0.0446175	0.0784392
								g__Machinavirus	8460.3	0.0541258	0.290581	0.186267	0.852235	0.902825		s__Watermelon bud necrosis tospovirus	88.2066	-1.41214	0.452642	-3.11978	0.00180986	0.00476421
								g__Marthavirus	120.625	-0.963541	0.443101	-2.17454	0.0296648	0.0595641		s__Watermelon silver mottle tospovirus	122.161	0.455638	0.324421	1.40447	0.16018	0.236074
								g__Mieseafarmvirus	6835.99	-0.764355	0.297943	-2.56544	0.0103044	0.0232003		s__Zucchini lethal chlorosis tospovirus	6.97859	-1.43267	0.690266	-2.07553	0.0379376	0.0681872
								g__Mooglevirus	491.307	-1.2854	0.344199	-3.73446	0.000188119	0.000748494		s__Athtab bunya-like virus	53.9216	-0.106458	0.453461	-0.234768	0.814389	0.861188
								g__Moonvirus	15750.1	1.35362	0.275586	4.9118	9.02419e-07	6.00548e-06		s__Yongsan bunyavirus 1	2.0323	-2.85944	0.929161	-3.07744	0.00208786	0.00542348
								g__Mosigvirus	3392.34	0.0600001	0.279035	0.215027	0.829746	0.883809		s__Tilapia tilapinevirus	6.97515	-4.78383	0.749139	-6.38577	1.70537e-10	2.12524e-09
								g__Muvirus	124.627	-3.16564	0.486323	-6.50933	7.54875e-11	1.35159e-09		s__Influenza A virus	29.5219	-0.83405	0.503811	-1.65548	0.0978268	0.155528
								g__Myohalovirus	573.95	0.823377	0.283663	2.90266	0.00370005	0.00959462		s__Influenza B virus	5.07884	-0.903682	0.758698	-1.1911	0.233616	0.325311
								g__Nankokuvirus	1860.52	-0.135579	0.372952	-0.363528	0.71621	0.797911		s__Salmon isavirus	0.0154937	0.306899	1.8816	0.163106	0.870435	NA
								g__Nazgulvirus	1073.72	-2.13437	0.469154	-4.5494	5.3799e-06	2.9968e-05		s__Quaranfil quaranjavirus	14.2581	2.72854	0.841345	3.24308	0.00118247	0.00329085
								g__Nitunavirus	1672.09	-0.220403	0.260591	-0.845781	0.397675	0.506867		s__Imjin mivirus	2.2791	2.16098	0.584489	3.69722	0.000217972	0.000740615
								g__Obolenskvirus	282.8	-0.962247	0.271377	-3.54579	0.000391434	0.00147179		s__Suffolk mivirus	53.7047	-2.4165	0.389461	-6.20474	5.47879e-10	6.21771e-09
								g__Otagovirus	377.059	-0.0939642	0.287196	-0.327178	0.743533	0.821053		s__Queensland carbovirus	228.953	2.79676	0.546757	5.11518	3.13448e-07	2.07107e-06
								g__Pakpunavirus	4245.27	-0.551121	0.288913	-1.90757	0.0564472	0.100827		s__Southwest carbovirus	0.0831097	0.640958	1.8288	0.350481	0.725978	NA
								g__Pbunavirus	4131.99	0.111244	0.210614	0.528188	0.597369	0.694315		s__Mammalian 1 orthobornavirus	0.126855	0.0460711	1.8816	0.0244851	0.980466	NA
								g__Peduovirus	38904.2	-1.61053	0.323881	-4.9726	6.60598e-07	4.4754e-06		s__Mammalian 2 orthobornavirus	0.957975	-2.36236	1.61741	-1.46059	0.144129	0.216385
								g__Phikzvirus	36786.4	1.82172	0.240626	7.57075	3.71087e-14	1.12511e-12		s__Passeriform 1 orthobornavirus	4.65685	-2.07043	0.544078	-3.80538	0.000141586	0.000504585
								g__Popoffvirus	391.316	-1.49977	0.476769	-3.14569	0.00165694	0.00492499		s__Passeriform 2 orthobornavirus	83.9443	2.5078	0.712997	3.51727	0.000436018	0.00136273
								g__Punavirus	29033.1	-2.59425	0.46138	-5.6228	1.87887e-08	1.88388e-07		s__Psittaciform 1 orthobornavirus	261.098	1.2403	0.531357	2.33421	0.0195846	0.038466
								g__Radnorvirus	528.203	-0.471048	0.299091	-1.57493	0.115272	0.182184		s__Lloviu cuevavirus	9.47393	-2.50775	0.847439	-2.95921	0.00308425	0.00759585
								g__Schizotequatrovirus	22523.2	0.484501	0.286369	1.69188	0.090669	0.150514		s__Bundibugyo ebolavirus	22.3224	-1.6032	0.457958	-3.50075	0.000463945	0.00143737
								g__Seoulvirus	644.526	0.359448	0.235971	1.52327	0.127691	0.198806		s__Reston ebolavirus	70.3858	0.623781	0.5237	1.1911	0.233612	0.325311
								g__Sepunavirus	1294	-0.571612	0.342147	-1.67066	0.0947882	0.155635		s__Sudan ebolavirus	53.9441	-1.47471	0.514582	-2.86585	0.00415895	0.00993205
								g__Seunavirus	13988.6	0.735593	0.28218	2.60682	0.00913872	0.0210163		s__Tai Forest ebolavirus	0.548442	-1.19476	1.33736	-0.893378	0.371655	0.475805
								g__Shalavirus	1279.02	0.273126	0.240355	1.13635	0.255812	0.351683		s__Zaire ebolavirus	0.845621	0.935937	1.38307	0.676709	0.498591	0.595165
								g__Siminovitchvirus	8121.32	-0.359884	0.179292	-2.00725	0.0447229	0.083041		s__Marburg marburgvirus	168.646	-0.306555	0.333431	-0.919395	0.357889	0.460728
								g__Slopekvirus	3509.25	-0.529441	0.354808	-1.49219	0.135649	0.208606		s__Beihai berhavirus	2.82134	-1.35404	0.871032	-1.55452	0.12006	0.184903
								g__Suspvirus	1375.74	0.591222	0.46808	1.26308	0.20656	0.29475		s__Midway nyavirus	29.1041	4.49289	0.871594	5.1548	2.53907e-07	1.71802e-06
								g__Svunavirus	221.81	-0.846327	0.316538	-2.6737	0.00750198	0.0177965		s__Nyamanini nyavirus	3.51721	-4.08134	0.654276	-6.23795	4.43341e-10	5.16531e-09
								g__Tegunavirus	1259.58	0.658765	0.235847	2.79318	0.00521921	0.0131266		s__Soybean cyst nematode socyvirus	133.399	-1.99078	0.62231	-3.19902	0.00137897	0.00376065
								g__Tequatrovirus	12212.4	-0.280516	0.218447	-1.28414	0.199094	0.28792		s__Tapeworm tapwovirus	1.05875	-2.04787	0.86519	-2.36696	0.017935	0.0357609
								g__Thornevirus	1102.1	1.26753	0.248216	5.10657	3.28067e-07	2.39521e-06		s__Avian avulavirus 10	121.775	-0.0304553	0.553115	-0.0550614	0.95609	0.968883
								g__Tulanevirus	4670.39	0.871238	0.248414	3.5072	0.000452854	0.0016612		s__Avian avulavirus 11	4.94271	2.20494	1.55084	1.42177	0.155093	0.230127
								g__Vequintavirus	2825.85	-0.0143068	0.287149	-0.0498237	0.960263	0.977155		s__Avian avulavirus 15	1502.08	0.801742	0.397938	2.01474	0.043932	0.0774068
								g__Vhmlvirus	8.80211	-2.43468	0.925335	-2.63113	0.00851016	0.019752		s__Avian avulavirus 16	7.11347	5.30087	1.5824	3.34989	0.00080843	0.00234088
								g__Vidavervirus	514.192	-0.050481	0.307445	-0.164195	0.869578	0.917142		s__Avian avulavirus 3	0.320799	-0.0625046	1.88127	-0.0332247	0.973495	0.979465
								g__Viunavirus	2672.74	-0.513634	0.260242	-1.97368	0.0484183	0.0887124		s__Avian avulavirus 4	50.0763	-4.53403	0.430657	-10.5282	6.40794e-26	8.70154e-24
								g__Yokohamavirus	84.9223	-2.26926	0.510075	-4.44887	8.63244e-06	4.47696e-05		s__Avian avulavirus 5	71.0192	-3.77947	0.64202	-5.88683	3.93664e-09	3.84778e-08
								g__Aqualcavirus	6.34607	-1.42267	0.58468	-2.43325	0.0149641	0.0324293		s__Avian avulavirus 8	385	-2.22189	0.546959	-4.06227	4.85985e-05	0.000197504
								g__Baltimorevirus	3484.82	1.07502	0.230152	4.6709	2.99881e-06	1.7347e-05		s__Avian avulavirus 9	0.920023	-2.24157	1.27492	-1.7582	0.0787129	0.128994
								g__Bifseptvirus	13.5706	-0.721092	0.823615	-0.875521	0.38129	0.492664		s__Reptilian ferlavirus	10.0801	-1.74369	0.808105	-2.15775	0.0309475	0.0575137
								g__Bruynoghevirus	1331.82	0.0216772	0.309193	0.0701089	0.944107	0.965384		s__Cedar henipavirus	5.71347	4.79071	0.780128	6.14093	8.20422e-10	9.04992e-09
								g__Cepunavirus	108.767	-1.2456	0.551753	-2.25754	0.0239745	0.0498033		s__Ghanaian bat henipavirus	10.0377	-1.24473	0.681554	-1.82631	0.0678036	0.113332
								g__Diegovirus	1918.63	-2.71085	0.428753	-6.32265	2.57121e-10	3.71837e-09		s__Hendra henipavirus	117.086	2.39595	0.759457	3.15482	0.00160595	0.0042847
								g__Drulisvirus	2892.45	0.577495	0.296051	1.95066	0.0510974	0.0925095		s__Mojiang henipavirus	0.333786	-1.18186	1.73157	-0.682535	0.494901	0.591298
								g__Enhodamvirus	5389	1.40195	0.436021	3.21533	0.00130295	0.00403217		s__Nipah henipavirus	44.4638	-0.818875	0.414572	-1.97523	0.0482421	0.0839864
								g__Enquatrovirus	2200.63	0.0799672	0.283504	0.282068	0.777892	0.845163		s__Beilong jeilongvirus	2345.86	2.67885	0.878293	3.05006	0.00228793	0.00585055
								g__Fipvunavirus	157.934	-1.78557	0.46112	-3.87224	0.000107838	0.000448034		s__Jun jeilongvirus	5.57708	1.16003	1.07355	1.08056	0.279894	0.377862
								g__Friunavirus	617.607	-0.147992	0.279501	-0.529486	0.596468	0.694315		s__Tailam jeilongvirus	14.5776	0.449329	0.604163	0.743722	0.457045	0.557745
								g__Gamaleyavirus	1909.17	0.133732	0.266401	0.501994	0.615672	0.714484		s__Canine morbillivirus	1368.55	-3.3406	0.373146	-8.95254	3.47396e-19	1.82406e-17
								g__Hollowayvirus	326.604	-0.469726	0.338245	-1.38871	0.16492	0.24607		s__Cetacean morbillivirus	21.4564	-2.40115	0.509112	-4.71635	2.40114e-06	1.30064e-05
								g__Ithacavirus	3598.85	-2.02913	0.386603	-5.2486	1.5326e-07	1.25274e-06		s__Feline morbillivirus	205.662	1.13888	0.707807	1.60902	0.107612	0.168366
								g__Johnsonvirus	473.907	-1.7123	0.29283	-5.84741	4.99283e-09	5.52148e-08		s__Measles morbillivirus	3.66299	-1.13339	0.979654	-1.15693	0.2473	0.341229
								g__Jwalphavirus	2306.27	0.639977	0.232213	2.75599	0.00585145	0.0146189		s__Rinderpest morbillivirus	13.4166	-3.10565	0.714612	-4.34592	1.38691e-05	6.47884e-05
								g__Kafunavirus	455.086	0.587389	0.325785	1.803	0.0713887	0.12201		s__Mossman narmovirus	19.3555	-2.91725	0.775179	-3.76332	0.00016767	0.000587441
								g__Kochitakasuvirus	248.197	1.94711	0.46592	4.17907	2.92709e-05	0.000136719		s__Nariva narmovirus	14.1171	-3.22105	0.47613	-6.76507	1.33247e-11	1.96527e-10
								g__Krylovvirus	217.983	-1.41759	0.444039	-3.1925	0.00141048	0.00429425		s__Avian orthoavulavirus 18	268.296	1.35274	0.53165	2.54442	0.010946	0.0231377
								g__Kuravirus	934.672	-0.900986	0.303678	-2.96691	0.0030081	0.00802159		s__Avian orthoavulavirus 19	200.98	-1.29973	0.495462	-2.62327	0.0087091	0.018917
								g__Lederbergvirus	10976.8	-1.51189	0.354004	-4.27084	1.94738e-05	9.57143e-05		s__Achimota pararubulavirus 1	3.32892	-0.265852	1.08028	-0.246096	0.805608	0.855809
								g__Lessievirus	1500.79	0.897716	0.317313	2.82912	0.00466764	0.0118985		s__Achimota pararubulavirus 2	90.7256	-0.650776	0.464336	-1.40152	0.161059	0.237281
								g__Lightbulbvirus	8766.68	0.776427	0.387116	2.00567	0.0448917	0.0831491		s__Menangle pararubulavirus	36.2232	0.773312	0.532677	1.45175	0.146572	0.219218
								g__Litunavirus	644.049	0.553221	0.318691	1.73592	0.0825785	0.138305		s__Sosuga pararubulavirus	38.248	-0.836885	0.547545	-1.52843	0.126406	0.193581
								g__Luzseptimavirus	852.129	1.8661	0.39425	4.7333	2.20896e-06	1.35052e-05		s__Teviot pararubulavirus	2.63156	-1.94448	0.431033	-4.51121	6.4458e-06	3.20904e-05
								g__Myxoctovirus	19.1424	-2.04884	0.615476	-3.32886	0.000872012	0.00296721		s__Tioman pararubulavirus	41.37	-0.377646	0.418612	-0.902138	0.366983	0.47013
								g__Oslovirus	4818.4	-1.61011	0.407651	-3.94972	7.82424e-05	0.000336219		s__Tuhoko pararubulavirus 1	204.832	1.82734	0.452206	4.04094	5.32383e-05	0.000214808
								g__Pagevirus	824.544	-0.69399	0.355408	-1.95266	0.0508605	0.0923842		s__Tuhoko pararubulavirus 2	1397.49	0.32794	0.416839	0.78673	0.43144	0.533944
								g__Perisivirus	279.997	-0.835568	0.29063	-2.87503	0.00403992	0.0104399		s__Tuhoko pararubulavirus 3	19.2631	-1.24904	0.765322	-1.63205	0.10267	0.16192
								g__Phikmvvirus	6203.76	-2.01132	0.343031	-5.86337	4.53578e-09	5.09091e-08		s__Bovine respirovirus 3	27.0243	-2.94985	0.487267	-6.05386	1.41415e-09	1.50106e-08
								g__Phimunavirus	137.905	-0.873799	0.295265	-2.95937	0.00308264	0.00819132		s__Human respirovirus 1	6.4644	0.0919141	0.715357	0.128487	0.897763	0.927681
								g__Pradovirus	108.067	-2.65479	0.424203	-6.2583	3.89206e-10	5.13479e-09		s__Human respirovirus 3	449.833	-1.39865	0.514875	-2.71648	0.00659803	0.014856
								g__Przondovirus	2021.47	0.000877793	0.246167	0.00356584	0.997155	0.998483		s__Porcine respirovirus 1	28.2291	-1.53692	0.490513	-3.13329	0.00172856	0.00457157
								g__Rauchvirus	151.85	0.789849	0.363311	2.17403	0.0297029	0.0595641		s__Bat mumps rubulavirus	8.30696	-1.77815	0.898836	-1.97828	0.0478972	0.0834597
								g__Rosenblumvirus	364.725	-1.76216	0.469085	-3.7566	0.00017224	0.000692645		s__Human rubulavirus 2	1711.14	1.0539	0.339296	3.10613	0.00189555	0.00496982
								g__Salasvirus	632.669	1.7473	0.230828	7.56972	3.7404e-14	1.12511e-12		s__Mapuera rubulavirus	17.9318	-2.25403	0.65919	-3.41939	0.000627613	0.0018866
								g__Schmidvirus	129.349	2.18618	0.392109	5.57543	2.46923e-08	2.4115e-07		s__Mumps rubulavirus	52.4002	2.00676	1.2342	1.62596	0.103959	0.163234
								g__Teseptimavirus	9641.54	-0.278351	0.200746	-1.38659	0.165568	0.246549		s__Simian rubulavirus	0.389318	0.349955	1.4687	0.238275	0.811667	0.859233
								g__Traversvirus	1179.03	-1.3373	0.397989	-3.36015	0.000779013	0.00266281		s__Salem salemvirus	246.297	-2.27777	0.375403	-6.06752	1.29898e-09	1.39005e-08
								g__Uetakevirus	5571.63	-2.23485	0.392639	-5.69186	1.2566e-08	1.29447e-07		s__Human metapneumovirus	38.7972	-1.94329	0.898479	-2.16287	0.0305512	0.0568563
								g__Vicosavirus	393.663	0.654703	0.222365	2.94427	0.00323721	0.00855603		s__Bovine orthopneumovirus	226.81	-0.438708	0.444782	-0.986345	0.323964	0.424691
								g__Zindervirus	7462.63	0.641553	0.206905	3.10072	0.00193051	0.00562691		s__Human orthopneumovirus	35.8614	0.957278	0.734891	1.30261	0.192707	0.276459
								g__Abidjanvirus	454.188	2.49342	0.342262	7.2851	3.21425e-13	8.33488e-12		s__Balsa almendravirus	3.65748	2.87067	0.999999	2.87067	0.00409597	0.00981737
								g__Acadianvirus	4486.82	1.09387	0.330852	3.30622	0.000945648	0.00311898		s__Coot Bay almendravirus	19.5195	-2.26684	0.612092	-3.70342	0.000212713	0.000727055
								g__Ahduovirus	162.605	-0.610882	0.326835	-1.86908	0.061611	0.107999		s__Rio Chico almendravirus	11.7422	-0.731356	0.939333	-0.778591	0.436221	0.538676
								g__Andromedavirus	443.613	-0.966651	0.337568	-2.86357	0.0041889	0.0107879		s__Xingshan alphanemrhavirus	0.077797	-0.141946	1.88159	-0.0754395	0.939865	NA
								g__Arequatrovirus	136.554	-3.88879	0.484235	-8.0308	9.68408e-16	4.85495e-14		s__Xinzhou alphanemrhavirus	4.8921	-2.76032	1.43386	-1.92509	0.0542178	0.092911
								g__Attisvirus	5.08196	0.771043	0.778821	0.990013	0.322168	0.425036		s__Iriri curiovirus	187.829	-1.3452	0.331978	-4.05207	5.0767e-05	0.000205257
								g__Bantamvirus	427.741	-1.68395	0.577878	-2.91402	0.00356806	0.00928438		s__Rochambeau curiovirus	22.3546	0.880357	0.404056	2.1788	0.0293464	0.0549268
								g__Barnyardvirus	881.285	0.532727	0.317768	1.67646	0.0936475	0.154098		s__Lettuce necrotic yellows cytorhabdovirus	0	0	0	0	1	NA
								g__Baxtervirus	105.247	3.58724	0.597523	6.00351	1.93095e-09	2.30488e-08		s__Northern cereal mosaic cytorhabdovirus	18.931	-1.07593	0.886025	-1.21434	0.224619	0.314966
								g__Beetrevirus	143.171	0.356383	0.291629	1.22204	0.221691	0.314551		s__Persimmon virus A	138.406	-2.4245	0.316683	-7.65592	1.91938e-14	4.42018e-13
								g__Bendigovirus	64.4904	-3.76386	0.451301	-8.34002	7.4279e-17	5.58578e-15		s__Rice stripe mosaic virus	3.4806	-2.4755	0.740984	-3.34083	0.000835275	0.00240975
								g__Bernalvirus	2551.14	0.725238	0.237965	3.04767	0.00230625	0.00651991		s__Wuhan Insect virus 5	287.685	-4.79373	0.429221	-11.1684	5.81897e-29	1.34795e-26
								g__Betterkatzvirus	773.589	-0.962076	0.436648	-2.20332	0.027572	0.05619		s__Wuhan Insect virus 6	0.180921	0.567727	1.8816	0.301726	0.762861	NA
								g__Bignuzvirus	55.3711	0.75071	0.394462	1.90312	0.0570244	0.101617		s__Orchid fleck dichorhavirus	23.0566	-1.4627	0.639391	-2.28764	0.0221584	0.0428795
								g__Biseptimavirus	232.216	-1.37487	0.334228	-4.11357	3.89592e-05	0.000175433		s__Adelaide River ephemerovirus	70.8383	0.0708069	0.597618	0.118482	0.905686	0.932442
								g__Bongovirus	236.32	-0.627623	0.353308	-1.77642	0.0756641	0.128152		s__Berrimah ephemerovirus	66.5022	-3.13336	0.603383	-5.19299	2.06944e-07	1.40994e-06
								g__Bowservirus	153.08	-0.336959	0.45308	-0.743709	0.457053	0.565179		s__Kimberley ephemerovirus	3.05874	2.1839	1.59408	1.37	0.170686	0.249226
								g__Britbratvirus	598.757	0.709376	0.493282	1.43807	0.150413	0.22713		s__Koolpinyah ephemerovirus	21.3263	-4.17945	0.589662	-7.08787	1.36187e-12	2.35221e-11
								g__Bronvirus	9108.63	0.290465	0.15044	1.93077	0.0535113	0.0962691		s__Kotonkan ephemerovirus	13.1889	-3.6236	0.924631	-3.91897	8.89274e-05	0.000339009
								g__Brujitavirus	8.27795	0.202728	0.716511	0.282938	0.777224	0.845163		s__Obodhiang ephemerovirus	392.306	2.41193	0.455197	5.29864	1.16668e-07	8.39921e-07
								g__Brussowvirus	5692.45	-0.323532	0.275242	-1.17544	0.239817	0.335209		s__Yata ephemerovirus	192.706	1.21431	0.482334	2.51757	0.0118168	0.0246607
								g__Buttersvirus	112.038	-0.615648	0.327521	-1.87972	0.0601459	0.106021		s__Flanders hapavirus	1.46904	1.5438	1.03114	1.49718	0.134346	0.203874
								g__Camvirus	103.275	0.487511	0.385493	1.26464	0.205999	0.29475		s__Gray Lodge hapavirus	95.149	-4.63994	0.74624	-6.21776	5.04291e-10	5.75623e-09
								g__Casadabanvirus	681.004	0.776955	0.370872	2.09494	0.0361763	0.0693994		s__Joinjakaka hapavirus	0.707315	-0.88093	1.80269	-0.488675	0.625072	0.707869
								g__Cbastvirus	179.849	0.467262	0.317279	1.47272	0.140827	0.215687		s__Kamese hapavirus	349.292	0.796599	0.954515	0.834559	0.403966	0.507523
								g__Cecivirus	678.667	-4.96503	0.432709	-11.4743	1.77621e-30	1.33571e-27		s__La Joya hapavirus	44.3614	0.658683	0.363116	1.81397	0.0696819	0.115881
								g__Ceduovirus	407.687	-2.30931	0.39228	-5.88689	3.9354e-09	4.55295e-08		s__Landjia hapavirus	4.6733	-0.174951	1.70454	-0.102638	0.91825	0.939971
								g__Cequinquevirus	771.037	0.733564	0.339846	2.15852	0.0308876	0.0614484		s__Marco hapavirus	116.382	-2.31539	0.635533	-3.64323	0.000269235	0.000890685
								g__Cetovirus	3825.66	1.11906	0.289137	3.87035	0.000108681	0.000449057		s__Ngaingan hapavirus	17.7028	0.314291	0.531977	0.590798	0.554656	0.646378
								g__Charlievirus	372.619	-0.143059	0.358914	-0.398589	0.690196	0.773513		s__Ord River hapavirus	7.54565	-3.43832	0.539447	-6.37377	1.84432e-10	2.29114e-09
								g__Chenonavirus	2974.45	-0.00310653	0.321644	-0.00965829	0.992294	0.997301		s__Parry Creek hapavirus	1.36934	-2.12956	1.27572	-1.6693	0.0950584	0.151739
								g__Cheoctovirus	7925.09	0.0486372	0.242305	0.200727	0.840912	0.893172		s__Wongabel hapavirus	0.802808	2.3029	1.6701	1.3789	0.167925	0.245734
								g__Chivirus	2423.24	-0.382102	0.253054	-1.50996	0.131053	0.202782		s__Barur ledantevirus	1.37766	-1.98014	1.70112	-1.16402	0.244414	0.338433
								g__Chunghsingvirus	463.58	-0.159687	0.322846	-0.494622	0.620867	0.717192		s__Fikirini ledantevirus	33.1338	-4.14386	0.758251	-5.46503	4.62832e-08	3.67233e-07
								g__Cimpunavirus	119.81	-0.763729	0.454451	-1.68055	0.0928499	0.153257		s__Fukuoka ledantevirus	35.6443	1.05198	0.885266	1.18832	0.234708	0.326368
								g__Cinunavirus	180.333	1.19442	0.388954	3.07086	0.00213446	0.0061205		s__Kanyawara ledantevirus	43.7333	1.15144	0.392236	2.93557	0.00332938	0.00811833
								g__Coetzeevirus	290.581	-0.117114	0.302995	-0.386521	0.699111	0.782338		s__Keuraliba ledantevirus	0	0	0	0	1	NA
								g__Coopervirus	3829.71	0.109244	0.226323	0.482693	0.629314	0.722577		s__Kolente ledantevirus	0.416747	-0.798607	1.14685	-0.696351	0.486209	0.58357
								g__Corndogvirus	304.474	0.668958	0.411497	1.62567	0.10402	0.168222		s__Mount Elgon bat ledantevirus	0.0764574	0.604989	1.8816	0.321529	0.747809	NA
								g__Cornellvirus	5014.41	0.978276	0.284585	3.43755	0.000587006	0.00206275		s__Nishimuro ledantevirus	42.2929	-3.70779	0.750242	-4.94213	7.7274e-07	4.73258e-06
								g__Cronusvirus	114.295	0.563904	0.444715	1.26801	0.204793	0.293902		s__Yongjia ledantevirus	1574.5	0.13477	0.363733	0.370518	0.710997	0.780788
								g__Decurrovirus	270.485	1.09191	0.409668	2.66536	0.0076907	0.0181298		s__Aravan lyssavirus	69.1345	2.38946	0.250366	9.54388	1.3758e-21	1.00331e-19
								g__Demosthenesvirus	1240.68	-1.2867	0.263337	-4.88612	1.02841e-06	6.78392e-06		s__European bat 1 lyssavirus	0	0	0	0	1	NA
								g__Detrevirus	683.964	2.33867	0.301715	7.75124	9.1002e-15	3.25874e-13		s__European bat 2 lyssavirus	8.22571	-2.91883	1.86779	-1.56272	0.118118	0.18234
								g__Dhillonvirus	3248.99	-0.782236	0.261918	-2.98657	0.00282126	0.00763161		s__Gannoruwa bat lyssavirus	2.18337	1.19383	1.24792	0.956658	0.33874	0.441854
								g__Eclunavirus	3469.99	0.19961	0.179791	1.11023	0.2669	0.362945		s__Khujand lyssavirus	19.0651	-0.55992	0.559889	-1.00005	0.317284	0.418301
								g__Efquatrovirus	1839.1	-1.22043	0.230276	-5.29987	1.15885e-07	9.57642e-07		s__Lleida bat lyssavirus	137.401	-0.111194	0.313752	-0.354399	0.72304	0.790266
								g__Eiauvirus	24.2497	1.17776	0.36921	3.18994	0.00142303	0.00431499		s__Mokola lyssavirus	136.738	1.02479	0.350942	2.92011	0.00349907	0.00851102
								g__Emalynvirus	1328.91	-1.75995	0.362836	-4.85055	1.23121e-06	7.98163e-06		s__Shimoni bat lyssavirus	73.0961	2.09679	0.477038	4.39544	1.10549e-05	5.27829e-05
								g__Eyrevirus	3031.86	-1.51091	0.457229	-3.3045	0.00095147	0.00312448		s__West Caucasian bat lyssavirus	4.0523	-1.83549	0.579986	-3.16471	0.00155235	0.00416711
								g__Fishburnevirus	34.2861	0.00432921	0.363885	0.0118972	0.990508	0.997301		s__Hirame novirhabdovirus	9.35261	2.22917	0.656319	3.39648	0.000682582	0.00202716
								g__Fromanvirus	31437.3	0.291754	0.191778	1.52131	0.128182	0.199158		s__Piscine novirhabdovirus	26.252	2.12879	0.747077	2.84949	0.00437895	0.0104064
								g__Gaiavirus	1525.67	0.68937	0.319317	2.15889	0.0308586	0.0614484		s__Salmonid novirhabdovirus	0.816059	-0.950896	0.665076	-1.42976	0.152787	0.227305
								g__Galunavirus	79.6996	-2.02548	0.574206	-3.52744	0.000419597	0.00155437		s__Datura yellow vein nucleorhabdovirus	3.66509	-2.87469	0.97115	-2.96009	0.00307552	0.00757909
								g__Gamtrevirus	7010.99	1.21127	0.373887	3.23966	0.00119671	0.0037497		s__Eggplant mottled dwarf nucleorhabdovirus	2951.84	0.867765	0.367344	2.36227	0.0181634	0.0361798
								g__Gesputvirus	102.112	-0.593493	0.35786	-1.65845	0.0972271	0.158945		s__Maize Iranian mosaic nucleorhabdovirus	271.704	-1.06848	0.52981	-2.01673	0.0437238	0.077109
								g__Getseptimavirus	332.288	1.65297	0.464666	3.55733	0.000374638	0.00141572		s__Maize fine streak nucleorhabdovirus	16.6627	0.972232	1.02752	0.94619	0.344052	0.447154
								g__Ghobesvirus	925.51	-0.635893	0.346294	-1.83628	0.0663159	0.114838		s__Rice yellow stunt nucleorhabdovirus	1.48297	-1.83505	1.24462	-1.47438	0.140379	0.211725
								g__Gilesvirus	2884.92	-1.44301	0.386848	-3.73018	0.000191342	0.00075731		s__Sonchus yellow net nucleorhabdovirus	310.708	0.908695	0.315164	2.88324	0.00393603	0.00945704
								g__Gordtnkvirus	236.299	0.118546	0.401631	0.295161	0.767871	0.836868		s__Anguillid perhabdovirus	0.668307	1.81405	1.85558	0.977615	0.328265	0.430042
								g__Gorjumvirus	2312.21	2.16788	0.61904	3.50201	0.000461763	0.00167752		s__Sea trout perhabdovirus	65.8687	3.34476	0.643776	5.19554	2.04126e-07	1.39557e-06
								g__Hanrivervirus	4.97345	1.58556	1.02513	1.54669	0.121939	0.191038		s__Drosophila ananassae sigmavirus	3.07461	-3.92939	1.41239	-2.78209	0.00540106	0.0124165
								g__Harrisonvirus	27.5314	-1.03322	0.514735	-2.00728	0.0447195	0.083041		s__Drosophila immigrans sigmavirus	3.9707	4.24972	1.46222	2.90635	0.00365673	0.00885621
								g__Hawkeyevirus	79.996	0.11606	0.327179	0.354728	0.722794	0.802867		s__Drosophila melanogaster sigmavirus	553.782	-0.554163	0.339929	-1.63023	0.103052	0.162328
								g__Hedwigvirus	283.082	-0.339674	0.614045	-0.553174	0.580144	0.68205		s__Drosophila obscura sigmavirus	16.6449	3.39818	1.32679	2.56121	0.0104308	0.0221677
								g__Helsingorvirus	792.62	-1.07712	0.398675	-2.70176	0.00689743	0.0165187		s__Carp sprivivirus	406.265	1.15821	0.341973	3.38683	0.000707041	0.0020919
								g__Hendrixvirus	11835.8	-2.11088	0.46233	-4.56574	4.97737e-06	2.81427e-05		s__Pike fry sprivivirus	1.24001	2.44775	1.87996	1.30202	0.192908	0.276647
								g__Homburgvirus	6784.26	1.15543	0.361454	3.19661	0.00139054	0.00425075		s__Almpiwar sripuvirus	185.821	-0.250005	0.295206	-0.846884	0.39706	0.501321
								g__Incheonvrus	477.056	0.682321	0.49934	1.36645	0.171799	0.254317		s__Chaco sripuvirus	994.491	1.07438	0.4087	2.62878	0.00856913	0.0186541
								g__Inhavirus	58.7439	-0.507996	0.463356	-1.09634	0.27293	0.369807		s__Niakha sripuvirus	33.5543	-5.65319	0.551598	-10.2487	1.19885e-24	1.24239e-22
								g__Jenstvirus	1591.18	-1.16003	0.260624	-4.45097	8.54814e-06	4.46403e-05		s__Sripur sripuvirus	637.78	0.326826	0.369087	0.885499	0.375888	0.479976
								g__Jerseyvirus	3953.31	0.400617	0.314226	1.27493	0.202333	0.291483		s__Beatrice Hill tibrovirus	25.233	-3.75782	0.473407	-7.93784	2.05738e-15	5.62636e-14
								g__Jesfedecavirus	1058.68	0.885724	0.327439	2.70501	0.00683028	0.0164497		s__Coastal Plains tibrovirus	21.0519	0.439086	0.485459	0.904475	0.365743	0.469152
								g__Kagunavirus	15310.3	3.15028	0.501712	6.27906	3.40628e-10	4.74357e-09		s__Ekpoma 1 tibrovirus	0.622753	1.81738	1.23109	1.47624	0.139881	0.211054
								g__Kelleziovirus	284.674	-0.333494	0.247027	-1.35003	0.177008	0.260323		s__Tibrogargan tibrovirus	14.0298	-1.32196	0.852107	-1.55141	0.120804	0.185976
								g__Klementvirus	420.132	0.714841	0.544006	1.31403	0.188836	0.275203		s__Tupaia tupavirus	28.702	-2.80894	1.11464	-2.52005	0.0117338	0.0245263
								g__Kostyavirus	2249.28	-1.4685	0.311063	-4.72092	2.34783e-06	1.40619e-05		s__Bole Tick Virus 2	1196.99	-0.1543	0.362636	-0.425495	0.670476	0.74649
								g__Lambdavirus	15927.3	0.889607	0.430836	2.06484	0.0389382	0.0741304		s__Culex tritaeniorhynchus rhabdovirus	150.736	0.894038	0.425778	2.09978	0.0357485	0.064785
								g__Liefievirus	538.652	-0.435561	0.277462	-1.5698	0.116461	0.183223		s__Huangpi Tick Virus 3	0.692912	-0.0614314	1.73314	-0.0354452	0.971725	0.979086
								g__Likavirus	8762.59	0.81433	0.245678	3.31463	0.00091766	0.00306702		s__Inhangapi virus	31.1727	-1.61144	0.529836	-3.04139	0.00235488	0.00601395
								g__Lilyvirus	0.488276	-0.91601	1.38147	-0.663067	0.507288	0.6143		s__Menghai rhabdovirus	29.6091	1.67761	0.569279	2.9469	0.00320976	0.00786562
								g__Limdunavirus	1339.16	-1.22963	0.402971	-3.05142	0.00227764	0.00646334		s__Riverside virus 1	3.02491	0.0758796	1.33024	0.0570421	0.954512	0.967783
								g__Lomovskayavirus	1221.31	-0.126296	0.38438	-0.32857	0.742481	0.821053		s__Santa barbara virus	18.9265	-5.38021	0.733525	-7.33473	2.22163e-13	4.39637e-12
								g__Lwoffvirus	2122.7	-0.91389	0.383073	-2.38568	0.0170476	0.0366642		s__Sanxia Water Strider Virus 5	4.1505	-1.74383	0.656864	-2.65478	0.00793601	0.0174397
								g__Mapvirus	875.276	1.93052	0.361185	5.34498	9.0429e-08	7.64074e-07		s__Shayang Fly Virus 3	4.58691	0.533071	0.836095	0.637572	0.523752	0.618823
								g__Mardecavirus	1041.5	1.34527	0.311539	4.31814	1.57348e-05	7.94133e-05		s__Spodoptera frugiperda rhabdovirus	5.1109	2.04693	0.559489	3.65856	0.000253633	0.000846447
								g__Marvinvirus	102.086	0.978874	0.346433	2.82558	0.00471947	0.01199		s__Tacheng Tick Virus 7	98.8854	-0.670952	0.345137	-1.94402	0.0518936	0.0894341
								g__Minunavirus	56.7676	1.17391	0.38238	3.07001	0.00214055	0.0061205		s__Wuhan House Fly Virus 2	150.64	0.969464	0.327359	2.96147	0.00306176	0.00755464
								g__Moineauvirus	1020.62	-0.741198	0.310734	-2.38532	0.0170644	0.0366642		s__Wuhan Insect virus 7	10.2621	-4.03414	1.31249	-3.07365	0.00211454	0.00548193
								g__Mudcatvirus	317.537	-0.954664	0.302391	-3.15706	0.00159371	0.00478111		s__Wuhan tick virus 2	28.6508	2.62191	0.77055	3.40264	0.000667384	0.00198651
								g__Myunavirus	1254.31	0.0510815	0.527654	0.0968085	0.922878	0.951995		s__Zahedan rhabdovirus	11.3373	-0.364204	0.775108	-0.469876	0.638444	0.719162
								g__Nickievirus	3712.31	-1.20094	0.265841	-4.51751	6.25698e-06	3.43449e-05		s__Lettuce big-vein associated varicosavirus	5.79556	-3.09838	0.734978	-4.21561	2.491e-05	0.000108874
								g__Nipunavirus	164.07	-2.34486	1.01545	-2.30918	0.0209339	0.0437285		s__Carajas vesiculovirus	0.661417	0.971191	1.27203	0.763496	0.445168	0.546128
								g__Nonagvirus	962.96	-1.55227	0.266964	-5.81452	6.08096e-09	6.62737e-08		s__Cocal vesiculovirus	3.62046	0.0581507	0.549148	0.105892	0.915668	0.937931
								g__Nonanavirus	116.109	-3.26954	0.567251	-5.76383	8.22276e-09	8.70918e-08		s__Malpais Spring vesiculovirus	161.374	2.16035	0.522449	4.13504	3.54898e-05	0.000150117
								g__Nyceiraevirus	268.899	-0.815159	0.342015	-2.3834	0.0171534	0.0367504		s__New Jersey vesiculovirus	199.361	-1.17053	0.31051	-3.76971	0.00016344	0.000574665
								g__Nymphadoravirus	367.581	1.86455	0.398513	4.67877	2.88597e-06	1.68236e-05		s__Perinet vesiculovirus	39.7149	1.44273	0.476531	3.02756	0.00246533	0.00626757
								g__Omegavirus	1928.08	0.840323	0.216421	3.88281	0.000103258	0.000433797		s__Piry vesiculovirus	33.559	2.31923	0.414051	5.60131	2.12736e-08	1.78625e-07
								g__Orchidvirus	240.241	0.275477	0.444801	0.619327	0.535701	0.638426		s__Radi vesiculovirus	79.5327	1.10618	0.317274	3.48652	0.000489354	0.00150634
								g__Oshimavirus	936.992	0.0292632	0.261841	0.11176	0.911014	0.94364		s__Yug Bogdanovac vesiculovirus	384.738	-0.95123	0.317397	-2.99697	0.00272675	0.00683076
								g__Pahexavirus	4497.32	0.0284519	0.28021	0.101538	0.919123	0.949424		s__Reptile sunshinevirus 1	3.92081	-1.2846	1.13392	-1.13289	0.257262	0.351526
								g__Pamexvirus	5295.27	0.743812	0.273887	2.71576	0.00661243	0.0160405		s__Tacheng chengtivirus	15.3074	1.70091	0.46688	3.64315	0.000269326	0.000890685
								g__Papyrusvirus	22.7385	-0.0838419	0.273834	-0.306178	0.759469	0.833149		s__Xincheng anphevirus	88.7721	-1.96966	0.603962	-3.26123	0.0011093	0.00310699
								g__Patiencevirus	53.442	0.405946	0.522371	0.777121	0.437087	0.545996		s__Beihai yuyuevirus	14.1228	1.61012	0.591746	2.72096	0.00650921	0.0146811
								g__Pbi1virus	46.6816	-0.82844	0.389253	-2.12828	0.0333136	0.0650698		s__Salmonella virus SKML39	122.515	-2.34391	0.399239	-5.87093	4.33357e-09	4.21372e-08
								g__Pegunavirus	2111.92	0.34472	0.235392	1.46445	0.143071	0.218678		s__Shigella virus AG3	533.892	0.0194584	0.477071	0.0407872	0.967466	0.977393
								g__Pepyhexavirus	724.231	-0.580842	0.230306	-2.52204	0.0116676	0.025806		s__Escherichia virus CBA120	52.2373	-1.6702	0.622564	-2.68278	0.00730134	0.016217
								g__Phayoncevirus	389.459	-2.17484	0.614266	-3.54055	0.000399299	0.00149389		s__Escherichia virus PhaxI	31.6777	0.556174	0.587386	0.946864	0.343708	0.446855
								g__Phicbkvirus	9123.17	-0.144414	0.293999	-0.491206	0.623281	0.718876		s__Salmonella virus 38	22.0789	1.07714	0.676157	1.59303	0.111152	0.173216
								g__Phietavirus	7850.42	0.670107	0.217021	3.08776	0.00201673	0.00583301		s__Salmonella virus Det7	5.70772	3.04163	0.847706	3.58807	0.000333141	0.00107887
								g__Phifelvirus	227.442	-0.243886	0.367517	-0.663606	0.506942	0.6143		s__Salmonella virus GG32	199.074	-0.89301	0.362497	-2.4635	0.0137589	0.0282055
								g__Pipefishvirus	11670	0.427082	0.357587	1.19435	0.232343	0.327808		s__Salmonella virus PM10	8.21472	-4.43515	1.07373	-4.13059	3.61835e-05	0.00015256
								g__Plotvirus	8.35421	-2.16456	1.19088	-1.81762	0.0691226	0.118676		s__Salmonella virus SH19	22.8321	-3.51393	1.04774	-3.35382	0.000797044	0.00231301
								g__Psavirus	1104.77	0.797824	0.423559	1.88362	0.0596162	0.105734		s__Dickeya virus Limestone	16127.4	4.08868	0.655367	6.23877	4.41022e-10	5.15354e-09
								g__Pulverervirus	44.0823	-1.03662	0.485723	-2.13417	0.0328285	0.0646174		s__Dickeya virus RC2014	57.5349	-1.53826	0.65273	-2.35666	0.0184401	0.036546
								g__Ravinvirus	127.586	0.714618	0.491974	1.45255	0.146348	0.222781		s__Erwinia virus Ea2809	776.399	-2.17732	0.320641	-6.79053	1.11721e-11	1.67923e-10
								g__Redivirus	204.286	0.884115	0.414626	2.13232	0.0329805	0.0646174		s__Klebsiella virus 0507KN21	1985.8	-0.554648	0.241284	-2.29873	0.0215201	0.041742
								g__Rerduovirus	446.726	0.589298	0.320597	1.83813	0.0660434	0.114699		s__Serratia virus MAM1	1616.3	0.682517	0.301488	2.26382	0.023585	0.045339
								g__Rigallicvirus	388.641	-0.232283	0.234401	-0.990965	0.321703	0.425036		s__Bacillus virus Agate	2205.96	1.18526	0.346091	3.4247	0.000615476	0.00185302
								g__Rogunavirus	3566.89	0.758042	0.228273	3.32077	0.000897688	0.00302718		s__Bacillus virus Bobb	2879.91	1.05437	0.201645	5.22886	1.70555e-07	1.17375e-06
								g__Rosebushvirus	833.333	-1.03871	0.479096	-2.16807	0.0301532	0.0603065		s__Bacillus virus Bp8pC	9012.4	-0.31295	0.388667	-0.805188	0.420711	0.523321
								g__Roufvirus	2272.21	-0.501703	0.27501	-1.82431	0.0681055	0.117198		s__Bacillus virus Bastille	38.09	0.796948	0.688841	1.15694	0.247297	0.341229
								g__Rtpvirus	176.686	-3.32719	0.404705	-8.22127	2.01351e-16	1.16474e-14		s__Bacillus virus CAM003	196.034	1.17963	0.598625	1.97057	0.0487734	0.0847615
								g__Samistivirus	1039.85	-0.383792	0.218348	-1.75771	0.0787976	0.132563		s__Bacillus virus Evoli	1.45845	-1.9856	1.6295	-1.21853	0.223022	0.312993
								g__Saphexavirus	271.272	2.22066	0.530927	4.18261	2.88184e-05	0.000135446		s__Bacillus virus BCP82	614.422	-0.870858	0.436541	-1.9949	0.0460534	0.0805679
								g__Sasvirus	26.5452	0.450228	0.60626	0.742632	0.457704	0.565179		s__Bacillus virus Bc431	759.272	0.753784	0.255006	2.95595	0.00311709	0.00766237
								g__Septimatrevirus	9868.96	1.50361	0.337391	4.45657	8.32819e-06	4.37958e-05		s__Bacillus virus Bcp1	26808.8	4.27749	0.580321	7.37091	1.69471e-13	3.38769e-12
								g__Seuratvirus	4457.47	-0.0913846	0.20309	-0.44997	0.652732	0.741472		s__Bacillus virus Deepblue	2319.47	1.42133	0.286142	4.96722	6.79193e-07	4.21871e-06
								g__Sextaecvirus	641.556	0.235895	0.292653	0.806057	0.42021	0.531089		s__Bacillus virus JBP901	100.436	-0.476302	0.5382	-0.88499	0.376162	0.480171
								g__Sitaravirus	1661.58	2.24409	0.414491	5.41409	6.15999e-08	5.44978e-07		s__Staphylococcus phage 812	1.27627	-1.37648	1.28976	-1.06724	0.285864	0.38434
								g__Skunavirus	3617.79	0.839233	0.254358	3.29941	0.000968885	0.00316783		s__Staphylococcus virus JD7	0.39684	0.673449	1.65587	0.406705	0.684225	0.758144
								g__Slashvirus	797.597	-0.865276	0.315452	-2.74297	0.00608858	0.0149628		s__Staphylococcus virus MCE2014	135.794	-3.85088	0.388248	-9.9186	3.45583e-23	3.02423e-21
								g__Smoothievirus	3746.04	0.212863	0.177439	1.19964	0.23028	0.325509		s__Staphylococcus virus P108	47.8994	-1.62954	0.365952	-4.45287	8.47287e-06	4.10408e-05
								g__Soupsvirus	830.505	1.69957	0.271553	6.2587	3.88202e-10	5.13479e-09		s__Staphylococcus virus Rodi	1.84976	1.9316	1.87884	1.02808	0.303913	0.404181
								g__Spbetavirus	6307.42	0.0419681	0.231618	0.181195	0.856214	0.905588		s__Staphylococcus virus S25-4	1.96069	0.391779	1.20661	0.324695	0.745412	0.808722
								g__Stanholtvirus	3455.21	0.416742	0.210034	1.98416	0.0472378	0.0870657		s__Staphylococcus virus SA12	12.3751	2.22876	0.603999	3.69001	0.000224248	0.000757364
								g__Steinhofvirus	1882.7	1.1298	0.307551	3.67355	0.000239201	0.000927213		s__Enterococcus phage phiEF24C	79.3313	-3.08533	0.825425	-3.73787	0.000185589	0.000643919
								g__Tequintavirus	5002	0.372774	0.22557	1.65259	0.0984152	0.160538		s__Enterococcus virus ECP3	8.42603	2.03759	0.384676	5.2969	1.17785e-07	8.46422e-07
								g__Timquatrovirus	4046.83	0.0971166	0.228647	0.424745	0.671023	0.757574		s__Enterococcus virus EFLK1	188.525	-0.985477	0.470832	-2.09305	0.0363445	0.0656535
								g__Tinduovirus	716.846	0.157597	0.354168	0.444978	0.656336	0.744441		s__Bacillus virus Camphawk	0.757423	-0.862552	1.44565	-0.596652	0.55074	0.643565
								g__Titanvirus	12.4704	-1.71402	0.872681	-1.96408	0.0495206	0.0903872		s__Bacillus virus SPO1	490.477	0.531969	0.395115	1.34637	0.178185	0.25807
								g__Tlsvirus	144.404	-0.203071	0.372691	-0.544878	0.585837	0.685147		s__Listeria virus AG20	15.8063	-1.70282	0.910719	-1.86975	0.0615184	0.104108
								g__Triavirus	83.2199	-0.948526	0.367957	-2.57782	0.00994259	0.0225337		s__Listeria virus LP048	10.406	1.35892	0.816056	1.66522	0.0958681	0.152784
								g__Trigintaduovirus	612.149	1.94013	0.338922	5.7244	1.03798e-08	1.08411e-07		s__Listeria virus P100	43.8484	-0.0710319	0.622886	-0.114037	0.909209	0.934847
								g__Trippvirus	25.4747	-0.00670704	0.308021	-0.0217746	0.982628	0.993194		s__Listeria virus WIL1	328.835	2.52352	0.944403	2.67208	0.0075383	0.0166934
								g__Tunavirus	97.18	-0.276005	0.344744	-0.800609	0.423358	0.53417		s__Staphylococcus virus Remus	250.942	-0.474093	0.268104	-1.76832	0.0770081	0.126674
								g__Unahavirus	659.875	-1.39235	0.361377	-3.8529	0.000116725	0.000479657		s__Bacillus virus BCP78	281.082	0.206583	0.361524	0.571422	0.567713	0.659097
								g__Unaquatrovirus	211.153	-2.53719	0.321167	-7.89989	2.79158e-15	1.10488e-13		s__Bacillus virus TsarBomba	715.301	-2.81091	0.373369	-7.52852	5.132e-14	1.10436e-12
								g__Vegasvirus	40.0784	-2.42685	0.481148	-5.04387	4.56206e-07	3.23648e-06		s__Staphylococcus virus Twort	670.794	-0.323529	0.313169	-1.03308	0.301566	0.40134
								g__Vendettavirus	107.295	-0.528826	0.285665	-1.85121	0.0641389	0.111908		s__Bacillus phage Eldridge	2418.92	-0.223561	0.303126	-0.737519	0.460807	0.561292
								g__Vieuvirus	357.198	1.18557	0.391621	3.02736	0.00246704	0.00687116		s__Bacillus phage SP-10	195.282	-1.45307	0.322468	-4.50609	6.60337e-06	3.2792e-05
								g__Vividuovirus	3066.27	-0.0473101	0.338154	-0.139907	0.888734	0.929138		s__Bacillus virus Mater	10255.5	0.685242	0.244909	2.79794	0.00514294	0.0118925
								g__Wbetavirus	140.94	-0.0837038	0.603007	-0.138811	0.8896	0.929138		s__Bacillus virus Moonbeam	1558.76	0.00911612	0.267177	0.0341202	0.972781	0.979086
								g__Webervirus	2464.21	-0.654976	0.296905	-2.20601	0.0273834	0.0559574		s__Brochothrix virus A9	210.7	0.172852	0.353829	0.488519	0.625182	0.707869
								g__Wildcatvirus	51.1742	1.08267	0.6691	1.6181	0.105641	0.169385		s__Enterococcus virus EFDG1	5323.49	0.864058	0.375247	2.30264	0.0212993	0.0413696
								g__Wizardvirus	10.3093	1.961	0.460176	4.26141	2.03145e-05	9.91979e-05		s__Lactobacillus phage LfeInf	3122.09	-0.706226	0.201747	-3.50056	0.000464279	0.00143737
								g__Woesvirus	2903.09	0.00798837	0.447751	0.0178411	0.985766	0.995028		s__Lactobacillus virus LP65	1651.39	-1.75606	0.218015	-8.05477	7.96266e-16	2.32274e-14
								g__Woodruffvirus	1958.92	0.550971	0.27546	2.00019	0.0454801	0.0840321		s__Lactobacillus virus Lb338-1	2627.39	-0.877003	0.392109	-2.23663	0.0253106	0.0483146
								g__Xiamenvirus	115.678	0.438017	0.490749	0.892548	0.372099	0.484115		s__Bacillus phage Belinda	894.151	0.835048	0.426966	1.95577	0.0504922	0.0874014
								g__Xipdecavirus	3316.76	0.417965	0.211833	1.97309	0.0484851	0.0887124		s__Bacillus phage DIGNKC	15.1042	-2.74535	0.635027	-4.32321	1.53778e-05	7.13093e-05
								g__Yuavirus	4452.72	1.1441	0.238584	4.79537	1.62371e-06	1.00911e-05		s__Bacillus phage DirtyBetty	13.2327	-2.99942	0.490612	-6.11363	9.73884e-10	1.06237e-08
								g__Yvonnevirus	210.444	0.459036	0.273215	1.68013	0.0929322	0.153257		s__Bacillus phage Kida	12.9378	2.28077	0.928961	2.45519	0.014081	0.0288058
								g__Batrachovirus	9137.4	0.417821	0.24596	1.69874	0.089369	0.148685		s__Bacillus phage Nemo	623.324	-1.28496	0.334343	-3.84324	0.000121422	0.000445628
								g__Cyprinivirus	10055.3	0.0492515	0.182119	0.270436	0.786825	0.852582		s__Bacillus phage Nigalana	80.132	-4.99191	0.655471	-7.61575	2.6216e-14	5.89935e-13
								g__Ictalurivirus	1465.34	0.552311	0.409332	1.3493	0.177242	0.260323		s__Bacillus phage NotTheCreek	0	0	0	0	1	NA
								g__Cytomegalovirus	26008.3	0.220067	0.157068	1.40109	0.161186	0.24194		s__Bacillus phage SageFayge	2677.4	-0.434589	0.359762	-1.20799	0.22705	0.31729
								g__Iltovirus	874.185	0.565653	0.280787	2.01453	0.0439539	0.0824273		s__Bacillus phage SalinJah	139.546	0.212945	0.410361	0.518921	0.603816	0.690627
								g__Lymphocryptovirus	2941.66	-0.286877	0.198329	-1.44648	0.148044	0.224454		s__Bacillus phage Zuko	23.2187	-0.0602626	0.551255	-0.109319	0.91295	0.936493
								g__Macavirus	22077.4	1.71192	0.381423	4.48823	7.18161e-06	3.8853e-05		s__Bacillus virus BPS10C	111.452	1.36312	0.482485	2.8252	0.00472508	0.0110826
								g__Mardivirus	8234.89	-0.459658	0.283936	-1.61888	0.105473	0.169385		s__Bacillus virus BPS13	101.525	1.24328	0.3701	3.3593	0.00078141	0.00227267
								g__Muromegalovirus	8269.77	0.579925	0.193861	2.99145	0.00277658	0.00759269		s__Bacillus virus Hakuna	28.8126	0.766233	0.440755	1.73845	0.082131	0.133926
								g__Percavirus	4307.29	-0.299492	0.253792	-1.18007	0.237973	0.333873		s__Bacillus virus Megatron	2.18096	-2.62459	1.01966	-2.57399	0.0100535	0.0214806
								g__Proboscivirus	5447.87	-0.583277	0.290308	-2.00917	0.0445195	0.083041		s__Bacillus virus WPh	1009.97	0.432401	0.3569	1.21155	0.225686	0.315832
								g__Rhadinovirus	15118.5	-0.0855089	0.226799	-0.377026	0.706155	0.787876		s__Brevibacillus virus Abouo	5.54701	-1.18343	0.782743	-1.51191	0.130558	0.198554
								g__Roseolovirus	8367.05	0.0472654	0.25404	0.186055	0.852402	0.902825		s__Erwinia virus Ea35-70	2964.37	1.28021	0.343242	3.72975	0.000191667	0.000662673
								g__Scutavirus	1208.7	-0.77979	0.288165	-2.70606	0.00680876	0.0164497		s__Enterobacteria phage vB_KleM-RaK2	235.833	-0.789506	0.307521	-2.56732	0.0102488	0.0218633
								g__Simplexvirus	5760.35	-0.242818	0.153788	-1.57891	0.114356	0.181426		s__Klebsiella virus K64-1	941.527	-0.527023	0.221092	-2.38372	0.0171385	0.0342595
								g__Varicellovirus	5308.18	-0.441355	0.218337	-2.02144	0.0432343	0.0812805		s__Escherichia phage PBECO 4	2479.55	-1.05146	0.245142	-4.28921	1.79309e-05	8.1444e-05
								g__Aurivirus	1187.27	0.368786	0.246272	1.49747	0.134271	0.206909		s__Escherichia virus 121Q	275.391	3.79547	0.574835	6.60271	4.03718e-11	5.53951e-10
								g__Ostreavirus	2683.6	0.979595	0.290169	3.37595	0.00073562	0.00254925		s__Escherichia virus Av05	1148.25	0.34967	0.293245	1.19241	0.233099	0.324821
								g__Betalipothrixvirus	669.592	-0.396334	0.348338	-1.13779	0.25521	0.351498		s__Burkholderia virus BcepMu	67.6307	-2.14844	0.596529	-3.60158	0.000316291	0.00103109
								g__Deltalipothrixvirus	8.55314	1.22811	0.772378	1.59004	0.111826	0.177786		s__Burkholderia virus phiE255	4.83827	0.393327	1.06805	0.368268	0.712674	0.782411
								g__Gammalipothrixvirus	1.5214	-1.6261	1.19399	-1.3619	0.17323	0.255442		s__Bacillus phage Phrodo	22.7642	-3.07585	0.691436	-4.4485	8.64706e-06	4.17817e-05
								g__Rudivirus	6062.4	-0.760121	0.234439	-3.24229	0.00118572	0.0037308		s__Bacillus virus AvesoBmore	44.8352	-0.206775	0.950692	-0.217499	0.827819	0.873279
								g__Betaarterivirus	1897.23	-1.27489	0.389457	-3.27352	0.00106219	0.00341352		s__Bacillus virus B4	63.9289	1.74593	0.810042	2.15535	0.0311342	0.0578061
								g__Deltaarterivirus	0.545685	1.44342	1.37962	1.04625	0.295448	0.396037		s__Bacillus virus Bigbertha	100.564	-1.37091	0.414241	-3.30945	0.000934798	0.00266563
								g__Epsilonarterivirus	19.6271	-0.674437	0.787512	-0.856415	0.391768	0.502329		s__Bacillus virus Spock	87.324	1.96827	0.361978	5.43753	5.40253e-08	4.1798e-07
								g__Gammaarterivirus	13.9459	-2.74205	0.580919	-4.7202	2.35611e-06	1.40619e-05		s__Bacillus virus Troll	2.31508	-2.26914	1.10021	-2.06247	0.039163	0.0700381
								g__Kappaarterivirus	230.376	0.0369099	0.571103	0.0646291	0.948469	0.967773		s__Aeromonas virus 31	516.17	-1.04371	0.422643	-2.4695	0.0135304	0.0277803
								g__Muarterivirus	2.14549	2.30311	1.37982	1.66914	0.0950903	0.155791		s__Aeromonas virus 44RR2	320.335	1.0942	0.25205	4.3412	1.41704e-05	6.59612e-05
								g__Thetaarterivirus	0.967072	-0.947308	1.29179	-0.733327	0.463359	0.571223		s__Mycobacterium phage Tonenili	565.232	-0.384553	0.272851	-1.40939	0.15872	0.234272
								g__Zetaarterivirus	0.560868	1.09127	1.37963	0.79099	0.42895	0.538515		s__Mycobacterium virus Alice	15.6291	3.6711	0.961947	3.81632	0.000135455	0.000487143
								g__Alphacoronavirus	2851.67	-0.0254028	0.2122	-0.119712	0.904712	0.941		s__Mycobacterium virus Bxz1	823.692	-0.341377	0.281374	-1.21325	0.225035	0.315369
								g__Betacoronavirus	2676.74	1.08249	0.325696	3.32361	0.000888616	0.00301009		s__Mycobacterium virus HyRo	1.14844	0.995207	1.34795	0.738309	0.460326	0.561054
								g__Deltacoronavirus	1865.42	0.405168	0.330704	1.22517	0.220513	0.31347		s__Salmonella virus SEN34	571.27	-2.34591	0.504933	-4.64598	3.38466e-06	1.77955e-05
								g__Gammacoronavirus	33.7328	-2.39812	0.594979	-4.03059	5.56374e-05	0.000244674		s__Cronobacter virus CR3	75.8585	-0.205022	0.494876	-0.41429	0.678662	0.753686
								g__Charybnivirus	1129.76	1.12983	0.286912	3.93789	8.22029e-05	0.000349246		s__Cronobacter virus CR8	16.0875	2.24824	1.05677	2.12746	0.0333815	0.0610006
								g__Alphamesonivirus	3034.42	1.61891	0.361772	4.47494	7.6434e-06	4.04777e-05		s__Cronobacter virus CR9	962.694	-0.305208	0.30559	-0.99875	0.317916	0.418853
								g__Alphamononivirus	655.043	1.49445	0.434028	3.44322	0.000574832	0.00203903		s__Cronobacter virus PBES02	21.1251	0.316399	0.520176	0.608254	0.543019	0.636242
								g__Okavirus	230.951	2.27851	0.468407	4.86439	1.14812e-06	7.50768e-06		s__Pectobacterium virus phiTE	283.913	0.697193	0.318653	2.18794	0.0286742	0.0538992
								g__Bafinivirus	208.045	-0.0922024	0.555618	-0.165946	0.8682	0.916975		s__Ralstonia virus RSF1	3684.11	-0.297275	0.357393	-0.831785	0.40553	0.508754
								g__Bostovirus	69.01	-0.310698	0.374494	-0.829646	0.406739	0.516668		s__Ralstonia virus RSL2	927.295	-0.0279219	0.298838	-0.0934348	0.925558	0.944506
								g__Infratovirus	387.529	-2.87094	0.359469	-7.98659	1.38718e-15	6.13622e-14		s__Escherichia virus Bp7	457.586	2.61276	0.350106	7.46278	8.47175e-14	1.76517e-12
								g__Oncotshavirus	23.748	3.00215	0.622515	4.82261	1.41695e-06	9.03004e-06		s__Escherichia virus IME08	890.187	-0.751185	0.320833	-2.34136	0.0192138	0.0379078
								g__Pregotovirus	347.81	0.248769	0.334426	0.743869	0.456956	0.565179		s__Escherichia virus JS10	956.39	2.34673	0.389496	6.02504	1.69071e-09	1.77074e-08
								g__Torovirus	0.327447	-0.369222	1.37958	-0.267633	0.788982	0.853043		s__Escherichia virus JS98	197.074	-1.3059	0.402366	-3.24556	0.00117219	0.00326687
								g__Badnavirus	19401.3	1.77333	0.183167	9.68151	3.61322e-22	6.79285e-20		s__Escherichia virus MX01	147.536	-1.96892	0.40669	-4.84133	1.28972e-06	7.49106e-06
								g__Caulimovirus	3744.87	0.0603986	0.226267	0.266935	0.789519	0.853043		s__Escherichia virus QL01	434.805	-0.175672	0.494021	-0.355597	0.722142	0.789612
								g__Cavemovirus	19.2678	3.28432	0.303397	10.8252	2.6162e-27	9.83692e-25		s__Escherichia virus VR5	49.8362	-0.0913206	0.610702	-0.149534	0.881132	0.914335
								g__Rosadnavirus	27.5109	-0.288871	0.51715	-0.558582	0.576447	0.680001		s__Pseudomonas virus EL	1277.24	0.0902083	0.305933	0.294863	0.768098	0.82535
								g__Solendovirus	42.1823	2.0944	0.711473	2.94375	0.00324264	0.00855603		s__Sinorhizobium virus M12	93.0759	0.900271	0.402025	2.23934	0.0251338	0.0480471
								g__Soymovirus	1140.38	0.518424	0.357198	1.45136	0.146679	0.222834		s__Sinorhizobium virus N3	3.96753	2.13885	1.04323	2.05022	0.0403425	0.0719189
								g__Alpharetrovirus	7.17769	-3.50352	1.10988	-3.15667	0.00159582	0.00478111		s__Cronobacter phage vB_CsaM_GAP32	5051.16	-0.851669	0.254157	-3.35096	0.000805324	0.0023336
								g__Betaretrovirus	534.457	-0.162992	0.349649	-0.46616	0.641101	0.731575		s__Erwinia virus Asesino	13323	-1.31373	0.35294	-3.72225	0.000197454	0.000679578
								g__Bovispumavirus	6.50527	0.893496	0.928194	0.962617	0.33574	0.440622		s__Erwinia virus EaH2	23051.6	-0.129701	0.214162	-0.605621	0.544766	0.63791
								g__Deltaretrovirus	51.1766	0.622798	0.440416	1.41411	0.157329	0.236622		s__Escherichia virus AYO145A	0.0456663	0.381422	1.8816	0.202712	0.83936	NA
								g__Epsilonretrovirus	2.19707	-1.35849	0.708557	-1.91726	0.0552053	0.0988437		s__Escherichia virus Alf5	495.223	-0.883271	0.442308	-1.99696	0.0458295	0.0802119
								g__Equispumavirus	12.506	-4.99966	0.788571	-6.34015	2.29536e-10	3.38453e-09		s__Escherichia virus HY02	312.296	-0.524866	0.703103	-0.7465	0.455366	0.556558
								g__Felispumavirus	4.29107	0.646384	1.17536	0.549947	0.582356	0.682308		s__Escherichia virus JH2	6.74866	-1.20201	0.643954	-1.86661	0.0619567	0.10467
								g__Gammaretrovirus	232.351	-0.922976	0.325593	-2.83475	0.00458612	0.0117599		s__Escherichia virus VpaE1	44.5886	-0.849087	0.354633	-2.39427	0.0166537	0.0334603
								g__Lentivirus	134.351	0.0457327	0.317237	0.144159	0.885375	0.929138		s__Escherichia virus wV8	3.09129	1.35456	1.12673	1.2022	0.229284	0.320071
								g__Prosimiispumavirus	72.6263	2.39049	0.37575	6.3619	1.99273e-10	3.05823e-09		s__Salmonella virus BPS15Q2	175.777	1.46034	0.475487	3.07126	0.00213158	0.00550797
								g__Simiispumavirus	689.027	2.52302	0.334824	7.53537	4.86966e-14	1.40845e-12		s__Salmonella virus FelixO1	146.625	-3.43703	0.655594	-5.24262	1.58315e-07	1.09955e-06
								g__Spumavirus	12.1196	-2.25381	0.487402	-4.62413	3.76182e-06	2.1431e-05		s__Salmonella virus SP116	5.40539	-4.23304	1.50752	-2.80795	0.00498583	0.0115805
								g__Aparavirus	16.269	-1.17817	0.613567	-1.9202	0.0548321	0.0984099		s__Salmonella virus UAB87	431.098	-1.35672	0.580296	-2.33798	0.0193881	0.0381943
								g__Cripavirus	1151.34	1.55866	0.451409	3.45287	0.000554659	0.00199571		s__Flavobacterium virus FCL2	1128.83	-1.25014	0.417084	-2.99733	0.00272355	0.00682709
								g__Triatovirus	263.745	-2.25677	0.450748	-5.00672	5.53654e-07	3.8197e-06		s__Campylobacter virus CP21	860.105	-2.49903	0.342868	-7.28861	3.13178e-13	6.07534e-12
								g__Iflavirus	2696.41	-0.622196	0.368063	-1.69046	0.0909393	0.150631		s__Campylobacter virus CP220	954.36	0.576853	0.253829	2.27261	0.0230497	0.0443929
								g__Bacillarnavirus	377.451	-0.892804	0.516494	-1.72858	0.0838835	0.140179		s__Campylobacter virus CPt10	398.206	0.741353	0.406257	1.82484	0.0680257	0.113621
								g__Kusarnavirus	144.583	-1.91125	0.694588	-2.75164	0.00592985	0.014717		s__Pseudomonas virus KIL4	58.9251	-1.60789	0.388297	-4.14089	3.45968e-05	0.000146813
								g__Labyrnavirus	290.026	-0.0670401	0.86951	-0.077101	0.938543	0.961559		s__Campylobacter virus CP30A	191.04	-2.9993	0.367011	-8.17223	3.02742e-16	9.85287e-15
								g__Sogarnavirus	33.8413	2.17603	0.836446	2.60152	0.00928116	0.0212788		s__Campylobacter virus CPX	45.18	-3.59347	1.02421	-3.50851	0.000450616	0.0014
								g__Ampivirus	0.130474	0.197	1.37953	0.142802	0.886446	0.929138		s__Escherichia virus VR20	7649.86	0.379745	0.142318	2.66829	0.00762378	0.0168476
								g__Aphthovirus	154.268	-1.01776	0.800267	-1.27177	0.203454	0.292538		s__Escherichia virus VR25	22.5015	-2.28354	0.496794	-4.59656	4.29521e-06	2.20529e-05
								g__Avihepatovirus	0.253014	0.0152985	1.38103	0.0110776	0.991161	0.997301		s__Escherichia virus VR26	83.0964	-1.15556	0.378464	-3.0533	0.00226343	0.0057992
								g__Avisivirus	0.781576	1.56304	1.37967	1.13291	0.257252	0.353018		s__Escherichia virus VR7	27.3122	-1.17026	0.532384	-2.19815	0.0279385	0.0527682
								g__Cardiovirus	256.049	-2.22309	0.277904	-7.99949	1.24936e-15	5.872e-14		s__Shigella virus SP18	332.85	0.204327	0.264897	0.771345	0.440503	0.542602
								g__Cosavirus	268.959	0.423212	0.378333	1.11862	0.2633	0.35935		s__Salmonella phage vB_SnwM_CGG4-1	2676.78	2.84892	0.453423	6.28314	3.31813e-10	3.95963e-09
								g__Enterovirus	1141.81	-1.8822	0.340257	-5.53171	3.17124e-08	2.98097e-07		s__Salmonella virus S16	136.538	0.852257	0.456782	1.86578	0.0620715	0.104819
								g__Erbovirus	0.466453	-0.98447	1.25226	-0.786155	0.431776	0.54116		s__Salmonella virus STML198	639.805	0.163535	0.369661	0.442391	0.658206	0.735786
								g__Gallivirus	44.9766	-1.92001	0.39877	-4.81483	1.47325e-06	9.23238e-06		s__Salmonella virus STP4a	1606.75	1.65914	0.44587	3.72112	0.000198338	0.00068155
								g__Hepatovirus	255.557	-2.91118	0.456056	-6.38338	1.73224e-10	2.71385e-09		s__Edwardsiella virus GF2	110.798	-2.68831	0.452288	-5.9438	2.78496e-09	2.81933e-08
								g__Hunnivirus	47.2759	2.50236	0.582108	4.29879	1.7173e-05	8.60606e-05		s__Halomonas virus HAP1	206.934	0.668316	0.546897	1.22201	0.221702	0.311586
								g__Kobuvirus	2830.03	-1.91349	0.296347	-6.45694	1.06843e-10	1.78546e-09		s__Vibrio virus VP882	1789.35	0.783875	0.273394	2.86719	0.0041413	0.00990192
								g__Kunsagivirus	56.94	-2.71504	0.398485	-6.81341	9.53094e-12	1.79182e-10		s__Aeromonas virus phiO18P	952.763	0.567282	0.389358	1.45697	0.145126	0.217716
								g__Limnipivirus	30.5377	1.68164	0.542795	3.0981	0.00194764	0.00565491		s__Haemophilus virus HP1	138.069	-0.160423	0.369748	-0.433872	0.664381	0.741171
								g__Livupivirus	0.601698	1.07461	1.37965	0.778899	0.436039	0.545593		s__Haemophilus virus HP2	24.9953	-4.69296	0.775191	-6.05394	1.41346e-09	1.50106e-08
								g__Megrivirus	35738.2	2.28859	0.360533	6.3478	2.18422e-10	3.28507e-09		s__Pasteurella virus F108	52.0658	2.34729	0.662353	3.54387	0.000394294	0.00124817
								g__Mischivirus	36.1641	-1.1846	0.507379	-2.33475	0.0195567	0.0409655		s__Pseudomonas phage phi3	4.8609	0.990396	0.734203	1.34894	0.177356	0.257248
								g__Mosavirus	2.41303	2.17808	0.925695	2.35291	0.0186272	0.0392371		s__Vibrio phage PV94	70.3688	-0.707985	0.451645	-1.56757	0.116982	0.180798
								g__Parechovirus	9.44472	2.74514	0.996468	2.75487	0.00587155	0.0146205		s__Erwinia virus EaH1	1367.92	-0.549476	0.331508	-1.6575	0.0974181	0.155003
								g__Passerivirus	10.2873	-5.21592	0.627734	-8.30912	9.64112e-17	6.59102e-15		s__Klebsiella virus JD001	117.787	2.5254	0.468562	5.38968	7.0585e-08	5.32497e-07
								g__Potamipivirus	181.532	-0.0689739	0.320553	-0.215172	0.829633	0.883809		s__Klebsiella phage vB_KpnM_KpV477	524.577	0.364979	0.331986	1.09938	0.271603	0.368183
								g__Rosavirus	42.1575	0.496173	1.0281	0.48261	0.629373	0.722577		s__Klebsiella virus JD18	1104.21	-0.449219	0.272323	-1.64958	0.0990289	0.157248
								g__Sakobuvirus	1.40326	1.539	1.31108	1.17384	0.240457	0.335481		s__Klebsiella virus PKO111	72.9193	-1.38243	0.378149	-3.65577	0.000256408	0.00085426
								g__Salivirus	245.739	-2.71991	0.506643	-5.36848	7.94026e-08	6.78532e-07		s__Enterobacter phage Arya	533.005	-0.913617	0.356663	-2.56157	0.0104201	0.0221568
								g__Sapelovirus	66.106	0.138488	0.589275	0.235015	0.814197	0.872867		s__Escherichia virus CVM10	2.44453	-1.34599	0.729369	-1.84541	0.0649774	0.109118
								g__Shanbavirus	77.7473	2.32932	0.468319	4.97378	6.56593e-07	4.4754e-06		s__Escherichia virus ep3	56.89	1.45451	0.798932	1.82057	0.0686725	0.114541
								g__Sicinivirus	5.43245	-0.443138	0.70358	-0.629834	0.528804	0.631207		s__Pseudomonas phage PPpW-3	780.619	0.74081	0.401787	1.84379	0.0652139	0.109468
								g__Torchivirus	36.1741	-1.77292	0.848964	-2.08833	0.036768	0.0703551		s__Enterobacter virus PG7	2887.89	0.777494	0.314814	2.46969	0.013523	0.0277797
								g__Tremovirus	17.2285	0.466011	0.586247	0.794905	0.426669	0.536882		s__Escherichia virus CC31	4688.19	0.702784	0.23857	2.94582	0.00322098	0.0078839
								g__Chipolycivirus	25.3432	-0.0227362	0.635999	-0.0357488	0.971483	0.987236		s__Rhizobium phage RHE	536.07	-0.884586	0.273234	-3.23747	0.00120596	0.00335387
								g__Sopolycivirus	127.329	0.708922	0.520551	1.36187	0.173239	0.255442		s__Erwinia virus Ea214	443.082	0.183038	0.363791	0.50314	0.614866	0.700214
								g__Cheravirus	15.1565	-3.61705	0.485412	-7.45151	9.22785e-14	2.47834e-12		s__Escherichia virus GEC3S	2.57864	-1.85987	0.652432	-2.85067	0.00436271	0.0103746
								g__Comovirus	4993.37	2.43094	0.536315	4.53266	5.82451e-06	3.22061e-05		s__Escherichia virus JSE	232.876	-1.13372	0.397379	-2.85298	0.0043311	0.0103057
								g__Fabavirus	154.048	-2.70253	0.423113	-6.38725	1.6889e-10	2.70224e-09		s__Escherichia virus RB49	103.412	0.604546	0.439704	1.37489	0.169165	0.247279
								g__Nepovirus	223.771	-0.13679	0.301752	-0.453318	0.65032	0.739849		s__Escherichia virus phi1	45.6798	1.47973	0.43708	3.3855	0.000710497	0.00210055
								g__Sadwavirus	13.4568	-2.74989	1.07236	-2.56434	0.0103372	0.0232046		s__Clostridium phage CDMH1	149.694	-2.97342	0.472274	-6.29597	3.05487e-10	3.67892e-09
								g__Sequivirus	43.1877	1.54815	0.563383	2.74796	0.00599669	0.0148273		s__Clostridium phage phiCD505	6.27979	-4.97927	1.24185	-4.00956	6.08316e-05	0.000242956
								g__Torradovirus	4224.43	3.35202	0.477255	7.02354	2.16313e-12	4.64764e-11		s__Clostridium phage phiCDHM19	42.0482	-3.8406	0.613495	-6.2602	3.84476e-10	4.54674e-09
								g__Waikavirus	187.608	1.03389	0.346725	2.98187	0.00286492	0.00769434		s__Clostridium phage phiMMP01	80.5248	2.91962	0.910207	3.20764	0.0013383	0.00366747
								g__Posavirus	51.7988	0.55758	0.862974	0.646114	0.518206	0.624504		s__Clostridium phage phiMMP02	0.0601132	0.0460711	1.8816	0.0244851	0.980466	NA
								g__Allexivirus	2338.51	0.794721	0.358074	2.21943	0.0264572	0.0542121		s__Clostridium virus phiCD119	485.58	1.40984	0.440983	3.19704	0.00138848	0.00378134
								g__Lolavirus	42.9531	-1.74177	0.881151	-1.9767	0.0480752	0.0883925		s__Clostridium virus phiCD27	99.7437	0.0458309	0.371315	0.123429	0.901768	0.929867
								g__Mandarivirus	145.621	0.361665	0.391354	0.924138	0.355415	0.46563		s__Erwinia phage vB_EamM_Caitlin	893.508	0.645796	0.364267	1.77286	0.0762511	0.125647
								g__Platypuvirus	1.50178	0.907809	1.37992	0.657872	0.510621	0.616351		s__Erwinia phage vB_EamM_ChrisDB	5564.3	1.17235	0.284516	4.12052	3.78019e-05	0.000158873
								g__Potexvirus	6886.28	-0.248883	0.289222	-0.860525	0.3895	0.501548		s__Erwinia phage vB_EamM_Huxley	243.281	-0.845043	0.279387	-3.02463	0.00248937	0.00630833
								g__Capillovirus	71.5711	-4.32918	0.628382	-6.8894	5.60285e-12	1.10877e-10		s__Arthrobacter virus BarretLemon	145.724	-1.29862	0.465327	-2.79078	0.00525819	0.0121234
								g__Carlavirus	1981.98	-1.31076	0.271467	-4.82844	1.37609e-06	8.84459e-06		s__Ralstonia virus RSL1	6948.71	-0.820909	0.308387	-2.66194	0.00776914	0.0170959
								g__Chordovirus	2.07058	0.585949	1.00704	0.581855	0.560664	0.663968		s__Citrobacter phage Michonne	370.014	-1.13522	0.435109	-2.60905	0.00907927	0.0196559
								g__Divavirus	0.133644	0.524825	1.37953	0.380438	0.70362	0.786215		s__Citrobacter virus Moogle	56.6798	-1.60104	0.404942	-3.95375	7.69372e-05	0.000297329
								g__Foveavirus	50.6644	-1.56836	0.401494	-3.90632	9.37143e-05	0.000395917		s__Citrobacter virus Merlin	174.231	0.0200523	0.304366	0.0658822	0.947472	0.963149
								g__Prunevirus	0.704735	0.658242	1.11862	0.588439	0.556238	0.659765		s__Citrobacter virus Moon	16069.6	1.49436	0.301086	4.96321	6.93364e-07	4.29995e-06
								g__Robigovirus	50.7473	-2.7482	0.475429	-5.78047	7.44918e-09	8.00255e-08		s__Escherichia virus APCEc01	1.25788	-0.911613	1.19376	-0.763649	0.445076	0.546128
								g__Tepovirus	89.7711	0.000378994	0.462083	0.000820186	0.999346	0.999346		s__Escherichia virus HX01	332.388	0.982198	0.466287	2.10642	0.0351675	0.0640267
								g__Trichovirus	319.141	1.37329	0.547333	2.50906	0.0121054	0.0266176		s__Escherichia virus JS09	25.8639	-2.85281	0.522968	-5.45503	4.89636e-08	3.85638e-07
								g__Vitivirus	3549.23	-0.97481	0.38086	-2.5595	0.0104823	0.0234605		s__Escherichia virus PhAPEC2	34.1666	-1.27532	0.63362	-2.01275	0.0441407	0.0776703
								g__Wamavirus	2227.39	0.797725	0.431577	1.8484	0.0645451	0.112356		s__Escherichia virus RB69	976.113	-1.31214	0.235587	-5.56967	2.55229e-08	2.11381e-07
								g__Maculavirus	714.747	0.738182	0.31568	2.33839	0.0193672	0.0406819		s__Shigella virus SHSML521	552.569	1.83181	0.470566	3.89279	9.90974e-05	0.000374516
								g__Marafivirus	3490.36	1.20522	0.35039	3.43965	0.000582457	0.00205637		s__Shigella virus UTAM	37.8596	1.12388	1.11855	1.00477	0.315008	0.415997
								g__Tymovirus	112.298	-0.221303	0.325916	-0.679019	0.497126	0.604917		s__Escherichia phage D108	1.87833	0.843408	1.17121	0.720115	0.471454	0.569855
								g__Atadenovirus	715.32	0.609084	0.344955	1.76569	0.0774478	0.130585		s__Escherichia virus Mu	7.10811	-4.48278	1.45055	-3.0904	0.00199886	0.00521116
								g__Aviadenovirus	3388.74	0.424573	0.29467	1.44084	0.149629	0.226401		s__Shigella virus SfMu	32.5514	-4.20663	0.776038	-5.42065	5.9382e-08	4.54954e-07
								g__Mastadenovirus	13740.3	-0.130215	0.17144	-0.759536	0.447532	0.556542		s__Natrialba phage PhiCh1	583.977	0.867689	0.29354	2.95595	0.00311708	0.00766237
								g__Siadenovirus	319.007	1.90651	0.461972	4.1269	3.67692e-05	0.000166569		s__Pseudomonas virus Ab03	127.651	-0.597055	0.294545	-2.02704	0.0426579	0.0753642
								g__Colecusatellite	880.977	-0.123571	0.254352	-0.485825	0.627091	0.722163		s__Pseudomonas virus KPP10	39.7945	-1.84834	0.825354	-2.23946	0.0251263	0.0480471
								g__Omegatetravirus	131.178	1.47533	0.310675	4.74878	2.04652e-06	1.26146e-05		s__Pseudomonas virus PAKP3	510.13	-1.48162	0.470239	-3.15078	0.00162833	0.00433267
								g__Zybavirus	1.30842	1.10735	1.3422	0.825027	0.409356	0.519116		s__Burkholderia virus BcepNazgul	1077.44	-2.14714	0.483523	-4.44063	8.9697e-06	4.31818e-05
								g__Ampullavirus	3394.01	2.78697	0.856393	3.25432	0.00113666	0.00359146		s__Bacillus virus Grass	758.107	-0.615778	0.333236	-1.84787	0.0646207	0.108611
								g__Alphatorquevirus	584.783	-1.51561	0.266817	-5.68031	1.34453e-08	1.36633e-07		s__Bacillus virus NIT1	383.787	0.879989	0.264552	3.32633	0.000879978	0.00252577
								g__Betatorquevirus	314.204	-1.76661	0.65521	-2.69625	0.00701245	0.0167408		s__Bacillus virus SPG24	89.2634	0.0997056	0.457335	0.218014	0.827418	0.87309
								g__Etatorquevirus	0.674135	0.122962	1.37975	0.0891193	0.928987	0.955675		s__Acinetobacter virus AP22	0.122914	0.418683	1.8816	0.222515	0.823913	NA
								g__Gammatorquevirus	144.832	-4.58755	0.488835	-9.38466	6.31218e-21	6.78108e-19		s__Acinetobacter virus LZ35	74.1569	-1.99414	0.434999	-4.58424	4.55638e-06	2.33329e-05
								g__Gyrovirus	1632.27	-0.0744341	0.526979	-0.141247	0.887675	0.929138		s__Pseudomonas virus Psa374	291.556	2.40833	0.414905	5.80453	6.45477e-09	6.08107e-08
								g__Iotatorquevirus	8.83527	-0.244978	1.03749	-0.236126	0.813335	0.872867		s__Pseudomonas virus VCM	147.345	-3.64294	0.320607	-11.3626	6.41945e-30	1.9446e-27
								g__Ascovirus	1672.74	-0.432961	0.232049	-1.86581	0.0620673	0.108546		s__Pseudomonas virus JG004	3.84876	2.74066	0.589751	4.64716	3.36539e-06	1.77178e-05
								g__Toursvirus	1299.76	1.90686	0.366665	5.20056	1.98692e-07	1.54037e-06		s__Pseudomonas virus MAG1	32.3342	-5.03644	0.589391	-8.54516	1.28358e-17	4.95561e-16
								g__Asfivirus	1326.55	1.50051	0.334634	4.48403	7.32453e-06	3.93432e-05		s__Pseudomonas virus PAKP1	8.47953	0.269675	0.850712	0.316999	0.751244	0.813528
								g__Avastrovirus	33.3242	1.30969	0.488728	2.67978	0.007367	0.0175316		s__Pseudomonas virus PAKP2	7.01628	3.53843	1.43415	2.46727	0.0136147	0.0279243
								g__Mamastrovirus	991.785	-1.11734	0.437304	-2.55507	0.0106166	0.0236904		s__Pseudomonas virus PaP1	444.237	-2.33643	0.458637	-5.09428	3.5006e-07	2.28235e-06
								g__Kieseladnavirus	24.3226	1.47758	0.408449	3.61754	0.000297417	0.00114111		s__Pseudomonas virus phiMK	18.8224	0.0518462	0.287477	0.180349	0.856879	0.897444
								g__Protobacilladnavirus	235.391	-1.229	0.356824	-3.44428	0.000572575	0.00203903		s__Burkholderia virus BcepF1	509.965	-0.938918	0.447824	-2.09662	0.0360272	0.06514
								g__Alphabaculovirus	71071.8	0.230725	0.192272	1.19999	0.230143	0.325509		s__Pseudomonas virus Ab28	27.8652	-0.705605	0.795026	-0.887525	0.374796	0.478893
								g__Betabaculovirus	25885.7	0.0502258	0.164435	0.305446	0.760027	0.833149		s__Pseudomonas virus DL60	250.559	-1.07538	0.289908	-3.7094	0.000207749	0.000711405
								g__Deltabaculovirus	623.648	0.775947	0.292348	2.65419	0.00794988	0.0186822		s__Pseudomonas virus DL68	28.1179	4.32645	0.638235	6.77878	1.21196e-11	1.80102e-10
								g__Gammabaculovirus	2578.29	-0.525381	0.258511	-2.03233	0.0421199	0.0793839		s__Pseudomonas virus F8	0.276189	1.13108	1.64724	0.686652	0.492302	0.589446
								g__Benyvirus	333.076	1.8615	0.368983	5.04495	4.53642e-07	3.23648e-06		s__Pseudomonas virus KPP12	12.0736	-5.13782	1.07415	-4.78313	1.72588e-06	9.69543e-06
								g__Bicaudavirus	20.4391	-0.441706	0.803491	-0.549733	0.582503	0.682308		s__Pseudomonas virus LBL3	1090.06	0.62024	0.269372	2.30254	0.0213046	0.0413696
								g__Bidensovirus	3.51901	-1.65389	1.27037	-1.3019	0.192951	0.280244		s__Pseudomonas virus PS44	58.1936	0.644262	0.62325	1.03371	0.30127	0.401082
								g__Aquabirnavirus	0.0942665	0.552144	1.37953	0.400241	0.688979	0.773302		s__Burkholderia phage KL3	3.6067	0.293478	0.645902	0.454369	0.649563	0.729393
								g__Blosnavirus	22.1759	-0.0190678	0.762807	-0.0249969	0.980057	0.992746		s__Burkholderia phage KS14	889.998	-0.00449792	0.61183	-0.00735158	0.994134	0.994796
								g__Ourmiavirus	14.3726	-2.27622	0.52154	-4.36441	1.27464e-05	6.47656e-05		s__Burkholderia phage KS5	189.576	0.791671	0.230585	3.43331	0.000596255	0.00180085
								g__Alfamovirus	0.399587	-1.27018	1.08364	-1.17214	0.24114	0.335809		s__Burkholderia virus phi52237	12.6104	0.146588	0.516245	0.28395	0.776449	0.832695
								g__Anulavirus	54.3328	-3.43183	0.726059	-4.72665	2.28257e-06	1.38427e-05		s__Burkholderia virus phiE202	15.7166	-1.84253	0.655327	-2.81162	0.00492932	0.0114726
								g__Bromovirus	547.113	-1.78456	0.292539	-6.10023	1.05916e-09	1.32749e-08		s__Enterobacteria phage P88	1067.31	-1.5079	0.357748	-4.21498	2.49799e-05	0.000109059
								g__Cucumovirus	21.3596	3.14409	1.07476	2.92539	0.00344025	0.0090366		s__Erwinia phage ENT90	302.298	-0.247951	0.383199	-0.647056	0.517596	0.612467
								g__Ilarvirus	5327.94	2.64379	0.367079	7.20223	5.92367e-13	1.43697e-11		s__Escherichia virus 186	75.9805	0.0780335	0.489432	0.159437	0.873325	0.910075
								g__Oleavirus	88.7095	-2.29143	0.425061	-5.39083	7.01337e-08	6.06213e-07		s__Escherichia virus P2	1795.17	-3.55147	0.575258	-6.1737	6.67096e-10	7.40007e-09
								g__Norovirus	4704.78	1.85424	0.458469	4.04442	5.24524e-05	0.000232025		s__Escherichia virus Wphi	10.0656	-1.25256	0.900164	-1.39148	0.16408	0.24128
								g__Sapovirus	211.541	-2.22442	0.47879	-4.64591	3.3858e-06	1.9436e-05		s__Escherichia virus fiAA91ss	1470.31	-2.59807	0.483369	-5.37492	7.66168e-08	5.71434e-07
								g__Vesivirus	45.3025	-3.44803	0.487597	-7.07148	1.53291e-12	3.39044e-11		s__Escherichia virus pro147	90.2002	-1.03766	0.47439	-2.18735	0.0287169	0.0539537
								g__Alphachrysovirus	173.764	-0.336381	0.292601	-1.14962	0.2503	0.34664		s__Escherichia virus pro483	2985.87	-3.01772	0.526517	-5.73147	9.95627e-09	9.03405e-08
								g__Betachrysovirus	918.978	-1.16492	0.356666	-3.26615	0.00109022	0.00346989		s__Mannheimia phage vB_MhM_587AP1	61.3484	-1.52535	0.639335	-2.38583	0.0170406	0.0340813
								g__Chrysovirus	142.209	-0.569113	0.41385	-1.37517	0.16908	0.250785		s__Mannheimia virus PHL101	202.764	0.520269	0.407351	1.2772	0.201531	0.288069
								g__Circovirus	1214.42	0.245033	0.338349	0.724202	0.468942	0.576216		s__Pseudomonas virus phiCTX	1.00709	-1.45388	1.44633	-1.00522	0.314789	0.415847
								g__Cyclovirus	303.889	-0.813941	0.373063	-2.18178	0.0291261	0.0587207		s__Ralstonia phage RSY1	6.65375	-3.51789	0.731606	-4.80844	1.52109e-06	8.64368e-06
								g__Ampelovirus	125.518	-0.751278	0.335595	-2.23864	0.0251792	0.051876		s__Ralstonia virus RSA1	358.005	-1.03784	0.374594	-2.77056	0.00559597	0.0128346
								g__Closterovirus	822.756	-0.0327014	0.280816	-0.116451	0.907295	0.942384		s__Salmonella phage RE-2010	4518.71	-1.95263	0.496816	-3.93029	8.4845e-05	0.000325019
								g__Crinivirus	4626.18	3.41882	0.449782	7.60105	2.93734e-14	9.60381e-13		s__Salmonella phage SEN1	259.452	-2.38428	0.353799	-6.73907	1.59403e-11	2.27439e-10
								g__Velarivirus	253.874	-1.92766	0.269384	-7.15581	8.31824e-13	1.95479e-11		s__Salmonella virus FSLSP004	1154.32	-1.81449	0.516958	-3.50994	0.000448213	0.00139421
								g__Cystovirus	3.63582	1.84936	1.1505	1.60743	0.107959	0.172003		s__Salmonella virus PsP3	8.14931	2.77442	0.513848	5.3993	6.69021e-08	5.06655e-07
								g__Alphaendornavirus	4276.38	-0.445669	0.242803	-1.83552	0.0664291	0.114838		s__Stenotrophomonas phage Smp131	8.89904	-2.13599	0.629501	-3.39315	0.000690946	0.0020489
								g__Betaendornavirus	63.1313	0.252669	0.396144	0.637821	0.52359	0.627974		s__Yersinia virus L413C	92.5289	-2.54983	0.433182	-5.88629	3.94969e-09	3.84997e-08
								g__Flavivirus	2865.47	-0.536521	0.255199	-2.10236	0.0355215	0.0684927		s__Pseudomonas phage 201phi2-1	2363.93	-1.23728	0.289879	-4.26828	1.96988e-05	8.87575e-05
								g__Hepacivirus	1388.34	-0.511178	0.239658	-2.13295	0.0329288	0.0646174		s__Pseudomonas phage PhiPA3	7617.68	1.45016	0.343299	4.22418	2.39808e-05	0.000105398
								g__Pegivirus	45.9749	2.26301	0.441027	5.13124	2.87841e-07	2.12212e-06		s__Pseudomonas virus phiKZ	21107.8	2.04851	0.261063	7.84678	4.26845e-15	1.08446e-13
								g__Pestivirus	219.313	-0.430349	0.508171	-0.846859	0.397074	0.506867		s__Aeromonas virus 56	410.218	-1.54923	0.494367	-3.13377	0.00172574	0.00456719
								g__Alphafusellovirus	185.855	-0.460412	0.45867	-1.0038	0.315476	0.419148		s__Escherichia virus P1	18720.4	-3.70226	0.457926	-8.08486	6.2238e-16	1.88102e-14
								g__Betafusellovirus	7.79369	-4.83364	0.798388	-6.05425	1.41077e-09	1.73917e-08		s__Salmonella virus SJ46	4230.09	-1.62808	0.439645	-3.70318	0.000212916	0.000727055
								g__Begomovirus	4494.65	-0.0856388	0.211112	-0.405657	0.684995	0.769979		s__Arthrobacter virus ArV1	515.552	-0.378161	0.303058	-1.24782	0.212098	0.300401
								g__Capulavirus	33.2599	-0.776526	0.493117	-1.57473	0.115319	0.182184		s__Vibrio phage VH7D	419.695	-0.514258	0.444839	-1.15605	0.24766	0.341605
								g__Grablovirus	4.93665	-3.23661	0.412877	-7.83915	4.53603e-15	1.70555e-13		s__Vibrio virus KVP40	3821.97	-1.04155	0.387654	-2.68679	0.00721418	0.0160596
								g__Mastrevirus	538.91	-0.00220594	0.312822	-0.00705175	0.994374	0.997301		s__Vibrio virus ValKK3	703.774	-0.825666	0.515113	-1.60289	0.10896	0.170339
								g__Turncurtovirus	2.37848	-2.3251	0.902034	-2.57762	0.00994841	0.0225337		s__Vibrio virus nt1	12899.1	1.45332	0.323464	4.493	7.02265e-06	3.4569e-05
								g__Gemycircularvirus	941.916	1.05036	0.298732	3.51605	0.000438013	0.00161464		s__Salmonella virus SPN3US	648.939	0.433257	0.244701	1.77056	0.0766341	0.126217
								g__Gemyduguivirus	7.96285	-1.17213	0.622813	-1.882	0.0598358	0.105874		s__Staphylococcus virus IPLAC1C	1249.11	-0.725035	0.346875	-2.09019	0.0366004	0.0660553
								g__Gemykibivirus	3.6274	2.29055	0.590817	3.87691	0.000105791	0.000441973		s__Cronobacter virus GAP31	64.7754	-0.625282	0.430915	-1.45105	0.146765	0.219339
								g__Gemykolovirus	0.373385	0.868951	1.37954	0.629886	0.528769	0.631207		s__Escherichia virus 4MG	344.713	0.428409	0.315398	1.35831	0.174364	0.253749
								g__Globulovirus	1.16804	-1.69703	1.30377	-1.30164	0.193041	0.280244		s__Salmonella virus SE1	3955.1	2.07747	0.264557	7.85265	4.07345e-15	1.04164e-13
								g__Avihepadnavirus	7.07836	-0.328971	0.765785	-0.429586	0.667497	0.754823		s__Salmonella virus SSE121	13.3488	-1.20435	0.609637	-1.97551	0.0482098	0.0839673
								g__Orthohepadnavirus	55.4867	-3.58137	0.659011	-5.43446	5.49623e-08	4.97971e-07		s__Bacillus virus Shbh1	1251.08	0.328665	0.241405	1.36146	0.173367	0.252625
								g__Orthohepevirus	22.6972	0.0111006	0.390739	0.0284093	0.977336	0.991844		s__Bacillus virus CP51	2788.49	0.600653	0.24675	2.43426	0.0149224	0.030432
								g__Hypovirus	904.586	-0.171749	0.250497	-0.685633	0.492945	0.600847		s__Bacillus virus JL	11.1576	-2.70419	0.504798	-5.35697	8.46275e-08	6.22922e-07
								g__Glossinavirus	663.11	1.50255	0.381304	3.94056	8.12931e-05	0.000347343		s__Bacillus virus Shanette	2383.9	-0.966577	0.245413	-3.93858	8.19657e-05	0.000315524
								g__Muscavirus	872.583	-0.365079	0.225247	-1.62079	0.105063	0.16918		s__Klebsiella virus KP15	101.408	0.930015	0.33122	2.80784	0.00498746	0.0115805
								g__Fibrovirus	30.6917	-0.25013	0.504169	-0.496123	0.619808	0.71707		s__Klebsiella virus KP27	247.095	1.25135	0.533154	2.34707	0.0189219	0.0373881
								g__Habenivirus	8.16837	-5.14854	0.939431	-5.48049	4.24159e-08	3.90331e-07		s__Klebsiella virus Matisse	311.228	-0.302676	0.482275	-0.627602	0.530265	0.625205
								g__Inovirus	10.0337	0.840118	1.03785	0.809477	0.418241	0.52949		s__Escherichia virus SUSP1	1019.83	0.401343	0.541614	0.741012	0.458686	0.559574
								g__Lineavirus	0.846202	1.45591	1.36308	1.0681	0.285475	0.384388		s__Escherichia virus SUSP2	52.9789	0.732074	0.557378	1.31342	0.18904	0.271793
								g__Plectrovirus	21.603	-0.99608	0.58297	-1.70863	0.0875199	0.145931		s__Bacillus virus 1	8.62115	-0.626922	1.02449	-0.611935	0.540581	0.634329
								g__Saetivirus	0.476463	-0.748823	1.38143	-0.542065	0.587774	0.686344		s__Geobacillus virus GBSV1	28.5404	2.97476	0.642332	4.63119	3.63573e-06	1.89385e-05
								g__Vespertiliovirus	35.4483	0.122574	0.523375	0.234198	0.814831	0.872867		s__Yersinia virus R1RT	94.0447	-0.458576	0.336804	-1.36155	0.17334	0.252625
								g__Chloriridovirus	17117.7	1.42061	0.338807	4.19299	2.75302e-05	0.00013103		s__Yersinia virus TG1	189.736	0.311378	0.335829	0.927192	0.353827	0.456843
								g__Iridovirus	3919.29	-0.983404	0.296652	-3.31501	0.00091639	0.00306702		s__Enterobacteria phage RB27	4.55662	2.60896	1.04047	2.50748	0.0121596	0.0252955
								g__Lymphocystivirus	6704.42	-1.65097	0.301279	-5.47987	4.25627e-08	3.90331e-07		s__Enterobacteria phage RB51	472.817	4.3431	1.2347	3.51753	0.000435582	0.00136273
								g__Megalocytivirus	436.133	0.194853	0.320896	0.607215	0.543709	0.645922		s__Escherichia phage UFV-AREG1	681.126	1.44199	0.450245	3.20267	0.0013616	0.00371929
								g__Ranavirus	5921.65	0.758993	0.320502	2.36814	0.017878	0.0379781		s__Escherichia phage slur02	7.1305	0.598419	1.01324	0.5906	0.554788	0.646378
								g__Cilevirus	26.5901	-1.04137	0.928637	-1.12139	0.26212	0.35839		s__Escherichia phage vB_EcoM-UFV13	205.101	0.104586	0.399878	0.261544	0.793673	0.845411
								g__Mavirus	32.1467	-0.0892484	0.672619	-0.132688	0.89444	0.931605		s__Escherichia phage wV7	0.268743	0.0365404	1.88139	0.019422	0.984504	0.987262
								g__Sputnikvirus	0	0	0	0	1	NA		s__Escherichia virus E112	49.1566	1.06929	0.694031	1.54069	0.123392	0.189515
								g__Allolevivirus	28.4501	-1.22462	0.370013	-3.30967	0.000934055	0.003108		s__Escherichia virus HY01	75.0379	0.0611293	0.670649	0.0911494	0.927374	0.946114
								g__Levivirus	7.76774	-0.233171	0.440343	-0.529521	0.596444	0.694315		s__Escherichia virus HY03	45.0671	-4.0704	0.460904	-8.83133	1.03441e-18	4.85259e-17
								g__Enamovirus	9.92441	-2.24436	0.738297	-3.03992	0.00236644	0.00666504		s__Escherichia virus Ime09	12.7036	-1.13257	0.547889	-2.06715	0.0387196	0.0693711
								g__Luteovirus	384.395	-1.25415	0.40356	-3.10773	0.0018853	0.00551651		s__Escherichia virus RB3	46.5206	0.734339	0.469017	1.5657	0.117419	0.181403
								g__Polerovirus	3330.12	0.879853	0.23931	3.67663	0.000236337	0.000920857		s__Escherichia virus RB32	257.336	0.252742	0.387609	0.652053	0.514367	0.609379
								g__Marseillevirus	17085.7	-0.147484	0.151676	-0.972364	0.330869	0.434989		s__Escherichia virus T4	18.2784	0.999113	0.377245	2.64845	0.00808626	0.0177402
								g__Rubivirus	91.3772	-1.99074	0.449672	-4.42709	9.55137e-06	4.91961e-05		s__Shigella phage SHFML-11	12.8773	-0.370977	0.780099	-0.475551	0.634394	0.715419
								g__Megabirnavirus	898.678	-1.81963	0.45194	-4.02625	5.66727e-05	0.000247779		s__Shigella virus Pss1	21.1575	-0.606578	0.82431	-0.735862	0.461815	0.561998
								g__Alphatrevirus	186.893	0.760253	0.371235	2.0479	0.0405696	0.0766541		s__Shigella virus SHBML501	9.52571	-0.885774	1.10023	-0.80508	0.420774	0.523321
								g__Bdellomicrovirus	2.50823	0.517012	1.22086	0.423481	0.671944	0.757574		s__Yersinia virus D1	28.8334	-3.63464	1.22363	-2.97037	0.00297442	0.0073761
								g__Chlamydiamicrovirus	419.329	1.59687	0.546009	2.92462	0.00344881	0.0090366		s__Bacillus virus SP15	1129.67	1.42971	0.256523	5.57341	2.49798e-08	2.07532e-07
								g__Sinsheimervirus	174.315	2.47934	0.459818	5.392	6.96775e-08	6.06213e-07		s__Aeromonas virus 25	636.158	1.96075	0.380505	5.15303	2.56308e-07	1.73129e-06
								g__Spiromicrovirus	21.4511	-2.29817	0.861255	-2.6684	0.00762136	0.0180228		s__Aeromonas virus AS4	135.847	2.30296	0.593634	3.87942	0.000104706	0.000393071
								g__Cafeteriavirus	5951.61	-1.66029	0.317652	-5.22675	1.72516e-07	1.39497e-06		s__Aeromonas virus Aes12	17.9795	0.77811	0.489809	1.5886	0.112151	0.174565
								g__Mimivirus	33081.3	0.258784	0.136198	1.90005	0.0574262	0.102091		s__Aeromonas virus Aes508	25.1322	1.80482	0.63343	2.84929	0.00438171	0.0104064
								g__Nanovirus	384.936	1.65309	0.362668	4.55813	5.16113e-06	2.8964e-05		s__Stenotrophomonas virus IME13	90.177	-0.494311	0.3631	-1.36136	0.173399	0.252625
								g__Mitovirus	412.121	0.856881	0.286349	2.99243	0.00276762	0.00759269		s__Acinetobacter phage Ac42	204.738	-0.561569	0.318351	-1.76399	0.0777332	0.127654
								g__Narnavirus	225.702	-1.31611	0.352091	-3.73797	0.000185512	0.000742047		s__Acinetobacter phage Acj61	4455.97	2.14591	0.376459	5.70026	1.19626e-08	1.07065e-07
								g__Whispovirus	1837.15	-0.503836	0.212913	-2.3664	0.0179622	0.0380494		s__Acinetobacter phage Acj9	1682.58	0.0523839	0.36177	0.144799	0.88487	0.917004
								g__Alphanodavirus	83.414	0.285982	0.611806	0.46744	0.640185	0.731575		s__Acinetobacter phage YMC13/03/R2096	7169.63	1.60684	0.383763	4.18706	2.82589e-05	0.000122424
								g__Alphanudivirus	1305.5	0.65761	0.267781	2.45578	0.014058	0.0308211		s__Acinetobacter phage ZZ1	3206.97	1.00001	0.297228	3.36444	0.000766994	0.002244
								g__Betanudivirus	1538.86	0.346521	0.384117	0.902123	0.366991	0.479128		s__Acinetobacter phage phiAC-1	591.278	0.57796	0.296258	1.95087	0.051073	0.0883299
								g__Alphapapillomavirus	223.198	0.221365	0.35064	0.631317	0.527833	0.631207		s__Acinetobacter phage vB_AbaM_Acibel004	286.222	0.73658	0.367495	2.00433	0.0450352	0.0789269
								g__Betapapillomavirus	821.91	1.92799	0.327652	5.88426	3.99839e-09	4.55574e-08		s__Acinetobacter phage vB_AbaM_phiAbaA1	866.317	-1.53124	0.328536	-4.66081	3.14974e-06	1.6703e-05
								g__Chipapillomavirus	81.453	2.13865	0.559441	3.82284	0.000131924	0.000536252		s__Acinetobacter virus 133	290.634	-1.83827	0.295347	-6.2241	4.84326e-10	5.57683e-09
								g__Deltapapillomavirus	225.874	0.927408	0.567905	1.63303	0.102462	0.166418		s__Aeromonas phage CC2	1710.7	0.227075	0.30137	0.753475	0.451164	0.552452
								g__Dyoiotapapillomavirus	20.3783	1.83735	1.04977	1.75024	0.0800776	0.134416		s__Aeromonas phage PX29	1678.08	0.259707	0.188511	1.37768	0.168303	0.246111
								g__Dyokappapapillomavirus	364.14	2.32832	0.448384	5.1927	2.07269e-07	1.59048e-06		s__Aeromonas phage pAh6-C	4.16506	-1.65653	0.760744	-2.17751	0.0294427	0.0550547
								g__Dyomupapillomavirus	73.8209	0.165571	0.692899	0.238954	0.811141	0.872644		s__Aeromonas phage phiAS5	1564.05	0.328113	0.178685	1.83626	0.0663193	0.111087
								g__Dyonupapillomavirus	380.612	-1.09066	0.400216	-2.72518	0.00642656	0.01564		s__Aeromonas virus 65	2643.21	-1.0671	0.313406	-3.40485	0.000662003	0.00197348
								g__Dyoomegapapillomavirus	0	0	0	0	1	NA		s__Aeromonas virus Aeh1	9036.26	1.07054	0.278708	3.84108	0.000122492	0.00044872
								g__Dyophipapillomavirus	0	0	0	0	1	NA		s__Aggregatibacter phage S1249	879.34	-1.76047	0.306868	-5.73691	9.64206e-09	8.76915e-08
								g__Dyosigmapapillomavirus	278.232	-4.47039	0.469199	-9.5277	1.60814e-21	2.01553e-19		s__Agrobacterium phage 7-7-1	4017.82	2.06569	0.505436	4.08694	4.37102e-05	0.000179865
								g__Dyothetapapillomavirus	788.569	1.24808	0.975527	1.27939	0.200758	0.28977		s__Bacillus phage 0305phi8-36	1893.67	-0.195547	0.255846	-0.764313	0.444681	0.546041
								g__Dyoupsilonpapillomavirus	0.537466	1.39503	1.37962	1.01117	0.311933	0.41591		s__Bacillus phage AR9	3739.79	-1.15657	0.331301	-3.491	0.000481217	0.00148281
								g__Dyoxipapillomavirus	111.679	2.64601	0.391267	6.76266	1.35477e-11	2.48485e-10		s__Bacillus phage BCD7	223.632	-0.384965	0.284939	-1.35104	0.176681	0.256364
								g__Epsilonpapillomavirus	234.345	3.3298	0.613711	5.42568	5.77345e-08	5.16861e-07		s__Bacillus virus G	5530.55	0.270184	0.305048	0.88571	0.375774	0.479976
								g__Etapapillomavirus	360.486	-0.0707757	0.271269	-0.260906	0.794165	0.855605		s__Bdellovibrio phage phi1402	305.719	1.66277	0.471905	3.52354	0.00042583	0.00133513
								g__Gammapapillomavirus	1091.7	1.13927	0.337863	3.37199	0.000746277	0.00257431		s__Bdellovibrio phage phi1422	57.9731	-0.0586743	0.483489	-0.121356	0.903409	0.930585
								g__Iotapapillomavirus	1184.25	-1.11913	0.354702	-3.15514	0.0016042	0.00478715		s__Burkholderia phage BcepB1A	151.076	0.179134	0.511984	0.349883	0.726427	0.792648
								g__Lambdapapillomavirus	110.52	-0.651996	0.430628	-1.51406	0.130011	0.201584		s__Burkholderia phage KS10	1673.23	1.39873	0.49858	2.80542	0.00502507	0.0116473
								g__Mupapillomavirus	202.649	-0.224754	0.402861	-0.557895	0.576916	0.680001		s__Caulobacter phage Cr30	441.102	-0.420171	0.287377	-1.46209	0.143716	0.215848
								g__Nupapillomavirus	12.963	3.74173	0.829596	4.51031	6.47327e-06	3.52746e-05		s__Cellulophaga phage phiSM	291.607	-2.18301	0.564461	-3.86743	0.000109987	0.000410161
								g__Omegapapillomavirus	107.564	1.00306	0.486674	2.06106	0.039297	0.0746247		s__Citrobacter phage IME-CF2	371.546	1.3882	0.37382	3.71355	0.000204369	0.00070044
								g__Omikronpapillomavirus	1.26529	-1.41766	1.2302	-1.15238	0.249165	0.34632		s__Citrobacter phage Margaery	50.442	-3.14925	0.546031	-5.76752	8.04446e-09	7.3844e-08
								g__Phipapillomavirus	163.796	2.64225	0.563495	4.68903	2.74501e-06	1.61269e-05		s__Citrobacter phage Miller	0.994953	-0.193753	1.87896	-0.103117	0.91787	0.939826
								g__Pipapillomavirus	3.56222	1.44442	1.35306	1.06752	0.285735	0.384388		s__Citrobacter phage vB_CfrM_CfP1	203.106	-4.36693	0.551059	-7.92461	2.28865e-15	6.17307e-14
								g__Psipapillomavirus	207.229	-1.72696	0.454635	-3.79857	0.000145532	0.000588388		s__Clostridium phage c-st	1182.86	0.268745	0.213197	1.26055	0.207471	0.295167
								g__Rhopapillomavirus	468.325	1.71973	0.569732	3.0185	0.00254032	0.00702323		s__Clostridium phage phiCD481-1	35.5053	-1.49178	0.442742	-3.36941	0.000753297	0.00220885
								g__Sigmapapillomavirus	130.519	-0.778416	0.524726	-1.48347	0.137949	0.211709		s__Clostridium phage phiCD506	4.24187	1.24538	0.998128	1.24771	0.212136	0.300401
								g__Taupapillomavirus	0.802948	1.62598	0.992473	1.63831	0.101356	0.164978		s__Clostridium phage phiCDHM13	2.45848	-3.39817	1.53832	-2.20902	0.0271735	0.0515459
								g__Treisepsilonpapillomavirus	2.04893	-2.96726	1.13585	-2.61238	0.00899139	0.0207409		s__Clostridium phage phiCT453A	319.134	-0.442434	0.400024	-1.10602	0.268719	0.364903
								g__Treisiotapapillomavirus	8.28443	0.0589796	0.536113	0.110013	0.912399	0.943774		s__Clostridium phage phiCT9441A	476.321	-1.09482	0.634364	-1.72585	0.0843736	0.137299
								g__Upsilonpapillomavirus	0.109037	-0.186434	1.37953	-0.135143	0.892499	0.930873		s__Clostridium phage phiCTC2A	0.375481	0.23852	1.39125	0.171442	0.863876	0.902372
								g__Xipapillomavirus	761.13	-1.85324	0.501478	-3.69555	0.000219409	0.000859351		s__Clostridium phage phiMMP04	104.457	-1.82607	0.497353	-3.67157	0.000241065	0.000807326
								g__Zetapapillomavirus	183.008	1.21778	0.918904	1.32526	0.185086	0.271156		s__Cronobacter phage CR5	47214.4	2.01401	0.279042	7.2176	5.29141e-13	9.78289e-12
								g__Alphapartitivirus	31.207	-4.55514	0.630355	-7.2263	4.96335e-13	1.24415e-11		s__Cronobacter phage ENT47670	311.668	-0.282914	0.350132	-0.80802	0.419079	0.522092
								g__Betapartitivirus	147.297	1.5784	0.556961	2.83395	0.00459762	0.0117599		s__Cronobacter phage S13	1360.35	-0.202151	0.284454	-0.710664	0.477292	0.575322
								g__Cryspovirus	1.03191	-0.472508	0.854906	-0.552701	0.580468	0.68205		s__Cronobacter phage vB_CsaM_GAP161	986.488	0.304129	0.215633	1.4104	0.158422	0.234009
								g__Gammapartitivirus	947.373	-0.242026	0.353028	-0.685573	0.492982	0.600847		s__Cyanophage P-RSM1	646.862	-0.335688	0.272717	-1.2309	0.21836	0.307657
								g__Ambidensovirus	5660.51	1.38299	0.533655	2.59154	0.00955463	0.0218392		s__Cyanophage P-RSM6	1556.11	0.214137	0.19605	1.09226	0.27472	0.371593
								g__Amdoparvovirus	6.61621	-2.05059	0.758295	-2.70421	0.00684675	0.0164497		s__Cyanophage P-TIM40	946.275	1.0206	0.207004	4.93032	8.20945e-07	4.98901e-06
								g__Aveparvovirus	186.855	2.55794	0.916893	2.78979	0.0052742	0.0132207		s__Cyanophage S-RIM32	1727.1	0.511495	0.298389	1.71419	0.0864941	0.140401
								g__Bocaparvovirus	308.996	-0.502588	0.379456	-1.3245	0.185338	0.271156		s__Cyanophage S-RIM50	587.432	0.487714	0.366833	1.32952	0.183675	0.265144
								g__Brevidensovirus	150.488	-4.03932	0.683818	-5.90702	3.48362e-09	4.09325e-08		s__Cyanophage S-TIM5	2490.08	-0.864564	0.246426	-3.50841	0.000450787	0.0014
								g__Copiparvovirus	9.62186	-0.202881	0.722479	-0.280813	0.778854	0.845163		s__Cyanophage Syn30	18750.5	0.0567554	0.216591	0.262039	0.793291	0.845233
								g__Dependoparvovirus	2883.7	0.422944	0.460491	0.918463	0.358376	0.468694		s__Deftia phage phiW-14	1530.55	-0.751655	0.246084	-3.05446	0.00225464	0.00578045
								g__Erythroparvovirus	60.3155	-0.829091	0.578487	-1.4332	0.151799	0.228764		s__Edwardsiella phage PEi20	1520	0.631911	0.407703	1.54993	0.121159	0.186377
								g__Iteradensovirus	9.43878	2.13317	1.02636	2.07838	0.0376744	0.0719065		s__Enterobacteria phage SfI	566.54	-3.15832	0.545057	-5.79448	6.85332e-09	6.4258e-08
								g__Protoparvovirus	1699.14	-0.93767	0.28352	-3.30725	0.000942174	0.00311898		s__Enterobacteria phage SfV	366.186	-1.90583	0.515909	-3.69413	0.000220643	0.000746471
								g__Tetraparvovirus	236.936	3.22737	0.575584	5.60713	2.05712e-08	2.03546e-07		s__Enterobacteria phage phi92	919.155	-0.0939739	0.2733	-0.343849	0.73096	0.797153
								g__Alphapermutotetravirus	19.4142	1.843	0.945124	1.95001	0.0511755	0.0925095		s__Enterobacteria phage phiEcoM-GJ1	1334.92	1.66808	0.332632	5.01479	5.30908e-07	3.35589e-06
								g__Chlorovirus	29578.5	-0.0860795	0.198749	-0.433106	0.664938	0.753062		s__Enterobacteria phage phiP27	4602.7	-1.89897	0.41697	-4.55421	5.25828e-06	2.65816e-05
								g__Coccolithovirus	1556.07	-0.777713	0.196444	-3.95896	7.52766e-05	0.000325333		s__Erwinia phage phiEt88	2256.34	0.645907	0.321767	2.00737	0.0447098	0.0784873
								g__Phaeovirus	3883.97	1.28155	0.251386	5.09795	3.43347e-07	2.48266e-06		s__Erwinia phage vB_EamM-Y2	69.1652	-1.86577	0.903487	-2.06507	0.0389159	0.0696595
								g__Prasinovirus	27630.1	-0.335041	0.173425	-1.9319	0.0533717	0.0962483		s__Erwinia phage vB_EamM_EarlPhillipIV	1549.28	-0.0246304	0.416773	-0.0590978	0.952874	0.967368
								g__Prymnesiovirus	6475.86	-0.308395	0.244013	-1.26384	0.206286	0.29475		s__Erwinia phage vB_EamM_Kwan	7480.35	-1.48606	0.293005	-5.07177	3.94131e-07	2.54441e-06
								g__Raphidovirus	13947.9	2.23971	0.328342	6.82128	9.02338e-12	1.73989e-10		s__Erwinia phage vB_EamM_Phobos	472.15	-2.30306	0.302645	-7.60977	2.74585e-14	6.10912e-13
								g__Picobirnavirus	219.896	1.11708	0.457638	2.44097	0.0146477	0.0318814		s__Escherichia phage ECML-117	197.269	-0.322454	0.438103	-0.736024	0.461716	0.561998
								g__Pithovirus	8210.8	-1.1757	0.265965	-4.4205	9.84739e-06	5.03758e-05		s__Escherichia phage Lw1	204.451	0.749515	0.35087	2.13616	0.0326665	0.0600283
								g__Alphapleolipovirus	28.5714	0.781084	0.520313	1.50118	0.133308	0.205848		s__Escherichia phage phAPEC8	1122.66	-0.0941425	0.314898	-0.298962	0.764969	0.823523
								g__Gammapleolipovirus	10.8456	-0.464827	0.612282	-0.759171	0.44775	0.556542		s__Escherichia virus RB16	113.832	-0.435776	0.439856	-0.990725	0.32182	0.422378
								g__Bracovirus	2648.89	-0.577268	0.245087	-2.35535	0.0185051	0.0390894		s__Escherichia virus RB43	92.8807	-0.984631	0.392532	-2.50841	0.0121277	0.0252425
								g__Ichnovirus	7521.87	0.552487	0.261796	2.11037	0.0348263	0.0673249		s__Haemophilus phage Aaphi23	316.622	0.0290484	0.668323	0.0434646	0.965331	0.975487
								g__Alphapolyomavirus	1145.58	-0.832356	0.326915	-2.54609	0.0108936	0.0241652		s__Haemophilus phage SuMu	102.377	2.36123	0.615078	3.83892	0.000123576	0.000452271
								g__Betapolyomavirus	457.933	0.366484	0.409623	0.894685	0.370955	0.483463		s__Halocynthia phage JM-2012	3369.44	1.10478	0.458687	2.40857	0.0160151	0.0323588
								g__Deltapolyomavirus	35.7028	-4.93774	0.543122	-9.0914	9.77717e-20	9.19054e-18		s__Iodobacteriophage phiPLPE	439.575	1.30542	0.291834	4.47317	7.70698e-06	3.76552e-05
								g__Gammapolyomavirus	1.72969	-1.73326	1.2517	-1.38473	0.166135	0.246904		s__Klebsiella phage vB_KpnM_KB57	679.68	-1.26421	0.436867	-2.89382	0.0038059	0.00917237
								g__Alphaportoglobovirus	0.202016	0.443658	1.37953	0.321601	0.747755	0.824504		s__Lactobacillus phage KC5a	59.0808	-1.578	0.610372	-2.5853	0.00972932	0.0208569
								g__Hostuviroid	0.840097	1.18147	1.38118	0.855409	0.392325	0.502329		s__Lactobacillus phage phi jlb1	14.7826	-2.99589	0.605973	-4.94393	7.6562e-07	4.69628e-06
								g__Bevemovirus	1.87871	2.42186	0.774898	3.12539	0.00177572	0.00525724		s__Lactobacillus phage phiAQ113	25.1687	-1.91805	0.614803	-3.11978	0.00180987	0.00476421
								g__Brambyvirus	40.7475	2.01225	0.523313	3.84521	0.000120451	0.000492276		s__Lactobacillus prophage Lj771	3.37717	1.65899	0.894985	1.85365	0.0637893	0.107306
								g__Bymovirus	25.9664	1.69332	0.645274	2.62419	0.0086855	0.0200969		s__Mannheimia phage vB_MhM_3927AP2	1198.25	0.801304	0.365151	2.19445	0.0282033	0.0531155
								g__Ipomovirus	84.5139	-0.461104	0.357689	-1.28912	0.197357	0.285958		s__Microcystis phage MaMV-DC	192.048	3.31291	0.628724	5.26926	1.36975e-07	9.67129e-07
								g__Macluravirus	14.8649	-2.55894	0.851474	-3.0053	0.00265318	0.00730839		s__Microcystis virus Ma-LMM01	463.353	1.94429	0.292249	6.65286	2.87458e-11	3.98595e-10
								g__Poacevirus	88.7148	-3.47985	0.538472	-6.46246	1.03017e-10	1.76065e-09		s__Morganella phage vB_MmoM_MP1	5969.81	-0.305504	0.181947	-1.67908	0.0931365	0.14945
								g__Potyvirus	21055.3	1.9458	0.281804	6.9048	5.02745e-12	1.0218e-10		s__Mycobacterium phage Myrna	2088.57	0.305308	0.245966	1.24126	0.21451	0.303318
								g__Rymovirus	0.627526	1.05498	1.00661	1.04805	0.294614	0.395624		s__Pectobacterium bacteriophage PM2	3721.61	-0.317942	0.221533	-1.43519	0.151234	0.225249
								g__Tritimovirus	121.931	-1.011	0.481424	-2.10003	0.0357261	0.0687111		s__Pectobacterium phage PM1	15.1496	-0.135356	0.676724	-0.200016	0.841468	0.88507
								g__Alphaentomopoxvirus	673.316	-0.35108	0.410818	-0.854589	0.392779	0.502329		s__Pectobacterium phage ZF40	609.107	0.0174226	0.434297	0.0401167	0.968	0.977683
								g__Avipoxvirus	12695	0.908732	0.203054	4.47532	7.62986e-06	4.04777e-05		s__Pelagibacter phage HTVC008M	2440.92	1.91933	0.366489	5.23707	1.6315e-07	1.12914e-06
								g__Betaentomopoxvirus	4904.31	0.407888	0.279015	1.46189	0.143773	0.219304		s__Prochlorococcus phage MED4-184	707.218	-0.642408	0.267342	-2.40294	0.0162636	0.0328106
								g__Capripoxvirus	3714.74	-0.610751	0.279378	-2.18611	0.0288074	0.0582342		s__Prochlorococcus phage MED4-213	1078.39	0.448838	0.278166	1.61356	0.106623	0.16695
								g__Centapoxvirus	1416.64	-0.07213	0.228151	-0.31615	0.751888	0.827848		s__Prochlorococcus phage P-HM1	4139.53	0.101023	0.296503	0.340716	0.733317	0.798839
								g__Cervidpoxvirus	624.496	0.352654	0.344321	1.0242	0.30574	0.408377		s__Prochlorococcus phage P-HM2	1060.28	1.19967	0.387797	3.09356	0.0019777	0.00517144
								g__Crocodylidpoxvirus	1291.34	-0.80634	0.25925	-3.11029	0.00186906	0.00549038		s__Prochlorococcus phage P-RSM4	3700.47	1.71817	0.417042	4.11989	3.79053e-05	0.000158968
								g__Leporipoxvirus	1209.14	-0.801363	0.245419	-3.26528	0.00109357	0.00346989		s__Prochlorococcus phage P-SSM2	1554.68	1.06998	0.416905	2.56648	0.0102736	0.0219045
								g__Molluscipoxvirus	1749.59	0.373565	0.208001	1.79597	0.0724986	0.123626		s__Prochlorococcus phage P-SSM3	275.254	-1.11762	0.277371	-4.02934	5.59339e-05	0.000225211
								g__Orthopoxvirus	11948.8	0.514859	0.195603	2.63217	0.00848416	0.019752		s__Prochlorococcus phage P-SSM4	613.953	-1.43082	0.295195	-4.84703	1.25326e-06	7.30078e-06
								g__Parapoxvirus	2747.02	0.168545	0.237156	0.710693	0.477274	0.585498		s__Prochlorococcus phage P-SSM7	3726.29	-0.404543	0.436238	-0.927344	0.353748	0.456843
								g__Suipoxvirus	600.337	-1.74665	0.33677	-5.18649	2.143e-07	1.62781e-06		s__Prochlorococcus phage P-TIM68	2209.82	-0.0523151	0.232315	-0.22519	0.821832	0.86766
								g__Yatapoxvirus	695.393	-1.75483	0.340524	-5.15331	2.55922e-07	1.90548e-06		s__Prochlorococcus phage Syn1	1050.38	1.99431	0.381423	5.22861	1.70787e-07	1.17375e-06
								g__Quadrivirus	67.274	-0.371579	0.374803	-0.9914	0.32149	0.425036		s__Prochlorococcus phage Syn33	103.371	-0.846714	0.425021	-1.99217	0.0463524	0.080983
								g__Aquareovirus	112.895	0.348167	0.454895	0.765379	0.444046	0.553768		s__Proteus phage vB_PmiM_Pm5461	302.588	-0.733793	0.321206	-2.2845	0.0223424	0.0432144
								g__Coltivirus	595.504	1.83458	0.433366	4.23332	2.30268e-05	0.000110294		s__Pseudoalteromonas phage H101	1010.55	0.824513	0.292368	2.82013	0.00480049	0.0112131
								g__Cypovirus	520.122	-0.895149	0.506184	-1.76842	0.07699	0.130104		s__Pseudomonas phage Lu11	12061.8	3.16166	0.461559	6.84996	7.38697e-12	1.13378e-10
								g__Dinovernavirus	58.0761	-0.448214	0.32097	-1.39644	0.162583	0.243067		s__Pseudomonas phage OBP	8111.02	-1.26197	0.317561	-3.97394	7.06938e-05	0.000275909
								g__Fijivirus	669.214	-1.02433	0.344529	-2.97312	0.00294791	0.00788906		s__Pseudomonas phage PA11	18.757	0.255508	0.782015	0.32673	0.743872	0.807656
								g__Mimoreovirus	362.98	0.239641	0.481284	0.497919	0.618541	0.716707		s__Pseudomonas phage PaBG	2029.74	0.634379	0.216361	2.93204	0.00336738	0.00820591
								g__Mycoreovirus	567.903	-1.84254	0.33163	-5.556	2.76022e-08	2.66113e-07		s__Psychrobacter phage pOW20-A	26.2643	-2.29488	0.587687	-3.90493	9.4253e-05	0.000356893
								g__Orbivirus	4061.06	-1.76034	0.355919	-4.94591	7.57898e-07	5.08875e-06		s__Ralstonia phage RSP15	2218.36	1.76076	0.347339	5.06928	3.99317e-07	2.57367e-06
								g__Orthoreovirus	1867.47	0.819215	0.274595	2.98336	0.00285099	0.0076844		s__Rhizobium phage RR1-A	23.2101	-1.36042	0.493496	-2.7567	0.00583878	0.0133139
								g__Oryzavirus	11.1431	0.19235	0.635208	0.302813	0.762032	0.83336		s__Rhizobium phage RR1-B	156.664	-1.80259	0.44004	-4.09643	4.19578e-05	0.000173378
								g__Phytoreovirus	2320.21	-1.25682	0.410229	-3.0637	0.0021862	0.00622735		s__Rhizobium phage vB_RleM_P10VF	5258.78	-2.35826	0.46399	-5.08256	3.72382e-07	2.41987e-06
								g__Rotavirus	1922.52	0.334475	0.26527	1.26088	0.207351	0.295318		s__Rhizobium phage vB_RleM_PPF1	425.666	-1.33063	0.333932	-3.98474	6.75527e-05	0.000266022
								g__Seadornavirus	179.405	-1.19273	0.364351	-3.27358	0.00106193	0.00341352		s__Rhodococcus phage E3	1273.32	0.661563	0.237753	2.78256	0.00539316	0.0124055
								g__Drosmacovirus	0.0554529	0.0330877	1.37953	0.0239848	0.980865	0.992746		s__Rhodothermus phage RM378	1993.86	1.15358	0.281328	4.10047	4.12304e-05	0.000170911
								g__Huchismacovirus	5.16934	4.29428	1.20422	3.56601	0.000362459	0.00137661		s__Salmonella phage 118970_sal3	102.64	-1.25171	0.530711	-2.35855	0.0183465	0.0364524
								g__Porprismacovirus	769.85	1.44359	0.224211	6.43855	1.20618e-10	1.97184e-09		s__Salmonella phage 19	4682.54	3.92146	0.505378	7.75946	8.52912e-15	2.03562e-13
								g__Sobemovirus	371.862	0.132672	0.377523	0.351427	0.725268	0.804427		s__Salmonella phage 21	0.567345	-0.721027	1.73832	-0.414784	0.6783	0.753496
								g__Invictavirus	23.7009	-1.52371	0.479613	-3.17695	0.00148832	0.00449484		s__Salmonella phage ST64B	79.0054	-1.06414	0.330389	-3.22087	0.00127804	0.00351953
								g__Alphasphaerolipovirus	463.511	-2.5864	0.339099	-7.62728	2.39764e-14	8.19556e-13		s__Serratia phage PS2	935.526	-1.31423	0.316268	-4.15542	3.24696e-05	0.000138683
								g__Gammasphaerolipovirus	4363.19	0.55446	0.171695	3.22932	0.00124085	0.00385587		s__Shewanella phage Spp001	7.08149	0.360305	0.79623	0.452514	0.650899	0.730268
								g__Alphatectivirus	96.4751	2.67822	0.647094	4.13885	3.49057e-05	0.000161037		s__Shewanella sp. phage 1/4	60.8427	0.736482	0.53851	1.36763	0.171428	0.250216
								g__Betatectivirus	24.244	-5.37536	0.561815	-9.56784	1.09163e-21	1.64181e-19		s__Shewanella sp. phage 1/40	526.142	0.558071	0.503184	1.10908	0.267396	0.363607
								g__Alphavirus	1659.94	-0.886273	0.273987	-3.23473	0.00121759	0.00379928		s__Shewanella sp. phage 1/41	713.677	-1.41028	0.524832	-2.68711	0.00720725	0.0160533
								g__Betasatellite	588.227	-0.381654	0.237204	-1.60897	0.107624	0.171832		s__Shewanella sp. phage 3/49	6.25474	-1.18525	0.807752	-1.46735	0.142282	0.214266
								g__Alphacarmovirus	0.00644784	0.278956	1.37953	0.202211	0.839752	0.893172		s__Shigella phage SfII	613.66	-3.0966	0.4359	-7.10391	1.21279e-12	2.12265e-11
								g__Alphanecrovirus	28.1894	-2.77711	0.500502	-5.54865	2.8789e-08	2.74042e-07		s__Shigella phage SfIV	11334.2	-2.38565	0.515109	-4.63135	3.63283e-06	1.89385e-05
								g__Aureusvirus	57.9794	1.34065	0.40744	3.29041	0.00100041	0.00325675		s__Sinorhizobium phage phiM9	370.753	0.335697	0.355039	0.945522	0.344392	0.447449
								g__Avenavirus	24.6272	-1.26	0.820231	-1.53616	0.1245	0.194645		s__Sphingomonas phage PAU	34839.2	1.21389	0.277523	4.37401	1.21986e-05	5.76687e-05
								g__Betanecrovirus	52.5953	-2.43111	0.349772	-6.95054	3.63885e-12	7.60116e-11		s__Staphylococcus phage SA1	286.002	0.6085	0.441121	1.37944	0.167759	0.245647
								g__Dianthovirus	0	0	0	0	1	NA		s__Streptococcus phage EJ-1	230.973	-1.3651	0.364826	-3.74178	0.000182724	0.000635661
								g__Gammacarmovirus	2.77376	-2.27501	0.737217	-3.08594	0.00202912	0.00584634		s__Synechococcus phage ACG-2014b	489.145	-0.33268	0.262777	-1.26601	0.205508	0.292585
								g__Pelarspovirus	1.19269	-0.629948	1.37988	-0.456523	0.648014	0.738343		s__Synechococcus phage ACG-2014c	3782.34	0.529715	0.210173	2.52037	0.0117231	0.024517
								g__Tombusvirus	1991.58	2.23591	0.218986	10.2103	1.78365e-24	4.47102e-22		s__Synechococcus phage ACG-2014d	1760.39	0.661574	0.433926	1.52462	0.127353	0.194749
								g__Umbravirus	128.003	-1.72444	0.334489	-5.15545	2.53016e-07	1.90268e-06		s__Synechococcus phage ACG-2014e	99.5261	1.26394	0.476621	2.65187	0.00800479	0.0175811
								g__Leishmaniavirus	1.56405	-1.57411	1.37984	-1.14079	0.253956	0.350412		s__Synechococcus phage ACG-2014f	1261.08	0.864333	0.263606	3.27888	0.0010422	0.00293785
								g__Totivirus	32.7594	0.681563	0.422102	1.61469	0.106378	0.170204		s__Synechococcus phage ACG-2014g	5679.78	2.93705	0.407272	7.21151	5.53356e-13	1.00885e-11
								g__Trichomonasvirus	0.127302	-0.130995	1.37953	-0.0949562	0.92435	0.952207		s__Synechococcus phage ACG-2014h	232.305	-0.124413	0.395771	-0.314356	0.75325	0.814762
								g__Victorivirus	136.372	-0.484551	0.422683	-1.14637	0.251643	0.347859		s__Synechococcus phage ACG-2014i	263.001	0.0310817	0.420538	0.0739093	0.941083	0.957866
								g__Alphatristromavirus	1.0916	-0.793075	1.23327	-0.643069	0.520179	0.62588		s__Synechococcus phage S-CAM1	2096.51	0.401828	0.235268	1.70796	0.0876442	0.141859
								g__Alphaturrivirus	1.4923	0.57561	1.37989	0.417142	0.676575	0.761653		s__Synechococcus phage S-CAM22	870.703	0.709922	0.324957	2.18466	0.0289136	0.0542715
								g__Botybirnavirus	12.1632	-0.389104	0.443303	-0.877738	0.380086	0.492518		s__Synechococcus phage S-CAM3	78065.5	2.89682	0.326754	8.86545	7.61985e-19	3.65939e-17
								g__Idaeovirus	118.025	0.895266	0.75646	1.18349	0.236614	0.332586		s__Synechococcus phage S-CAM4	0	0	0	0	1	NA
								g__Negevirus	3.83178	-2.14714	1.06768	-2.01105	0.0443206	0.0829082		s__Synechococcus phage S-CAM7	1489.85	0.389368	0.282414	1.37872	0.167983	0.245734
								g__Pandoravirus	155430	0.523083	0.143051	3.65663	0.000255552	0.000985512		s__Synechococcus phage S-CAM8	497.035	-0.952482	0.35926	-2.65124	0.00801978	0.0176042
								g__Salterprovirus	25.9775	0.360087	0.531895	0.67699	0.498413	0.605503		s__Synechococcus phage S-CAM9	2873.44	-1.41416	0.345387	-4.09442	4.23224e-05	0.000174702
								g__Sinaivirus	507.809	1.18644	0.369482	3.21109	0.00132233	0.00407539		s__Synechococcus phage S-CRM01	739.916	-1.51982	0.392945	-3.86776	0.00010984	0.000410161
								g__Furovirus	237.368	-1.6766	0.410284	-4.08645	4.38021e-05	0.000194907		s__Synechococcus phage S-IOM18	2414.46	-1.82607	0.381755	-4.78336	1.72387e-06	9.69543e-06
								g__Goravirus	0.122341	-0.0761873	1.37953	-0.0552271	0.955958	0.974092		s__Synechococcus phage S-MbCM100	1278.46	-0.656352	0.26197	-2.50545	0.0122296	0.0254143
								g__Hordeivirus	51.378	-5.12108	0.646881	-7.91657	2.44144e-15	1.01998e-13		s__Synechococcus phage S-PM2	5674.6	-0.141259	0.206814	-0.683025	0.494591	0.591296
								g__Pecluvirus	56.8993	1.09689	0.499837	2.1945	0.0281997	0.0571595		s__Synechococcus phage S-RIM2	611.936	-2.14966	0.298063	-7.21211	5.50924e-13	1.00885e-11
								g__Pomovirus	537.942	-1.13108	0.46574	-2.42857	0.0151585	0.0327563		s__Synechococcus phage S-RIM8	2981.54	-0.174004	0.289394	-0.60127	0.54766	0.640536
								g__Tobamovirus	3031.62	0.585335	0.324115	1.80595	0.0709265	0.121496		s__Synechococcus phage S-RSM4	1279.85	0.309116	0.267661	1.15488	0.248139	0.341764
								g__Tobravirus	94.8002	1.80723	0.43752	4.13062	3.61787e-05	0.000164887		s__Synechococcus phage S-SM1	62824.1	2.18409	0.237934	9.17939	4.33523e-20	2.51061e-18
																s__Synechococcus phage S-SM2	398.275	-0.70677	0.304467	-2.32134	0.0202687	0.0395923
																s__Synechococcus phage S-SSM4	1715.1	0.0391319	0.230777	0.169566	0.865351	0.903434
																s__Synechococcus phage S-SSM5	122.609	-1.16768	0.29254	-3.99153	6.56479e-05	0.000259299
																s__Synechococcus phage S-SSM7	5325.67	1.10141	0.29289	3.76051	0.000169566	0.000593557
																s__Synechococcus phage S-ShM2	371.419	1.01456	0.356129	2.84886	0.00438761	0.0104087
																s__Synechococcus phage S-WAM1	951.089	-1.66203	0.272745	-6.09371	1.10321e-09	1.19681e-08
																s__Synechococcus phage S-WAM2	2440.85	0.332835	0.297247	1.11972	0.262831	0.358225
																s__Synechococcus phage Syn19	420.314	-0.682823	0.292422	-2.33506	0.0195401	0.0384223
																s__Synechococcus phage metaG-MbCM1	1025	1.71946	0.319954	5.37408	7.69765e-08	5.73031e-07
																s__Synechococcus phage syn9	1770.55	0.667389	0.218038	3.06088	0.00220689	0.00566911
																s__Thermus phage TMA	195.146	2.27888	0.409498	5.56506	2.62065e-08	2.16355e-07
																s__Thermus phage phiYS40	127.83	-3.97997	0.588613	-6.76161	1.36471e-11	2.00531e-10
																s__Vibrio phage 11895-B1	94.2293	-0.662031	0.450931	-1.46814	0.142065	0.214104
																s__Vibrio phage CP-T1	67.1012	1.26234	0.488059	2.58645	0.0096969	0.0208327
																s__Vibrio phage ICP1	293.232	-1.48441	0.393982	-3.76772	0.000164746	0.000578227
																s__Vibrio phage X29	2.08157	2.26405	1.70012	1.3317	0.182959	0.264207
																s__Vibrio phage martha 12B12	25.47	-2.36462	0.618189	-3.82508	0.000130729	0.000474044
																s__Vibrio phage vB_VchM-138	43.0281	4.13047	1.00379	4.11487	3.87402e-05	0.000161781
																s__Xanthomonas phage vB_XveM_DIBBI	218.322	-1.31187	0.341417	-3.84242	0.000121828	0.000446704
																s__Yersinia phage phiR1-37	22577.6	1.14096	0.438637	2.60115	0.00929126	0.0200159
																s__Escherichia virus FFH2	244.255	1.18232	0.339127	3.48637	0.000489619	0.00150634
																s__Escherichia virus FV3	718.344	1.45317	0.296402	4.9027	9.45275e-07	5.68319e-06
																s__Escherichia virus JES2013	76.6676	1.17283	1.02332	1.1461	0.251754	0.345439
																s__Escherichia virus V5	613.342	-0.212661	0.655657	-0.324348	0.745675	0.808722
																s__Escherichia virus slur16	221.716	-1.00119	0.401362	-2.49447	0.0126145	0.026159
																s__Vibrio virus VP585	5.42191	-3.38537	1.57505	-2.14937	0.0316049	0.0585694
																s__Burkholderia virus Bcep1	4.94499	-2.04842	0.690872	-2.96498	0.003027	0.0074913
																s__Burkholderia virus Bcep43	168.29	-1.47088	0.594515	-2.47409	0.0133576	0.0275117
																s__Burkholderia virus Bcep781	132.386	0.0849521	0.442393	0.192028	0.84772	0.890932
																s__Burkholderia virus BcepNY3	12.2098	-0.734615	0.538574	-1.364	0.172567	0.251692
																s__Xanthomonas virus OP2	154.066	1.56388	0.532281	2.93806	0.00330268	0.00805822
																s__Escherichia virus ECML4	1452.95	-1.40861	0.340254	-4.13987	3.47499e-05	0.000147304
																s__Salmonella virus Maynard	8.47838	1.05332	0.586591	1.79567	0.0725478	0.12009
																s__Salmonella virus SJ2	275.078	-3.97105	0.368671	-10.7713	4.705e-27	8.05578e-25
																s__Salmonella virus ViI	237.779	1.96804	0.388397	5.06709	4.0394e-07	2.59921e-06
																s__Edwardsiella virus MSW3	8.56377	-0.253421	0.475995	-0.532402	0.594448	0.682091
																s__Edwardsiella virus PEi21	64.6361	-2.75844	0.927547	-2.97391	0.00294035	0.00730541
																s__Caulobacter phage Percy	6.4024	-1.28888	0.594839	-2.16677	0.0302525	0.0564174
																s__Dinoroseobacter virus DFL12	456.631	1.05679	0.34617	3.0528	0.00226716	0.00580499
																s__Silicibacter phage DSS3phi2	57.8826	0.616137	0.59568	1.03434	0.300976	0.400827
																s__Sulfitobacter phage EE36phi1	2569.42	1.35283	0.275598	4.9087	9.16816e-07	5.52898e-06
																s__Sulfitobacter phage phiCB2047-B	6.59518	-3.0095	1.00191	-3.00377	0.00266656	0.00669702
																s__Pseudomonas virus Andromeda	5.66865	0.741453	1.19145	0.622314	0.533736	0.627606
																s__Pseudomonas virus Bf7	2.98033	-0.932553	1.3191	-0.706959	0.479592	0.577387
																s__Pseudomonas phage DL54	28.3285	-5.69284	0.659595	-8.63081	6.0921e-18	2.52533e-16
																s__Pseudomonas virus Ab22	591.817	0.555931	0.508614	1.09303	0.27438	0.371484
																s__Pseudomonas virus LUZ24	296.213	-0.0315331	0.717446	-0.0439518	0.964943	0.975345
																s__Pseudomonas virus TL	192.131	2.93104	0.531582	5.5138	3.51172e-08	2.81653e-07
																s__Streptococcus virus Cp1	107.975	-1.13002	0.569996	-1.9825	0.0474229	0.0827066
																s__Shigella virus 7502Stx	1005.33	-3.89076	0.505638	-7.69476	1.41757e-14	3.28375e-13
																s__Shigella virus POCJ13	61.7351	-0.768726	0.488501	-1.57364	0.11557	0.178757
																s__Klebsiella virus F19	105.693	1.02894	1.21008	0.850308	0.395154	0.499351
																s__Klebsiella virus K244	5.27205	3.10716	1.86116	1.66947	0.0950235	0.151739
																s__Klebsiella virus KP34	12.5143	-0.176434	0.714234	-0.247026	0.804888	0.855506
																s__Klebsiella virus Kp2	65.903	1.58186	0.515592	3.06804	0.00215469	0.00555675
																s__Klebsiella virus KpV41	60.7698	0.703257	0.580666	1.21112	0.225849	0.315948
																s__Klebsiella virus KpV475	1.01644	-1.52493	1.87961	-0.811301	0.417193	0.52073
																s__Klebsiella virus KpV71	0.498215	-1.2476	1.88041	-0.663468	0.507031	0.602783
																s__Klebsiella virus SU503	43.855	1.07476	0.496037	2.1667	0.0302574	0.0564174
																s__Klebsiella virus SU552A	9.19494	-0.690587	0.901475	-0.766063	0.443639	0.545271
																s__Vibrio phage J2	33.4891	-4.72606	0.565684	-8.35458	6.56656e-17	2.3724e-15
																s__Vibrio phage QH	15.191	3.89616	0.423898	9.19125	3.88291e-20	2.28222e-18
																s__Vibrio virus VC8	0.979087	-1.50205	1.86197	-0.806699	0.41984	0.522709
																s__Vibrio virus VP2	41.4909	-0.374352	0.801155	-0.467266	0.64031	0.720646
																s__Vibrio virus VP5	2.94198	3.46243	1.54267	2.24445	0.0248037	0.0475292
																s__Escherichia virus N4	2221.75	0.142534	0.294269	0.484366	0.628126	0.710385
																s__Flavobacterium phage Fpv3	0	0	0	0	1	NA
																s__Acinetobacter phage Petty	1.81773	-2.53186	1.34807	-1.87813	0.060363	0.102329
																s__Acinetobacter phage vB_AbaP_Acibel007	13.0325	0.786661	0.344422	2.284	0.0223714	0.0432493
																s__Acinetobacter virus AB3	7.64338	0.457875	0.952944	0.480485	0.630883	0.712889
																s__Acinetobacter virus Abp1	104.331	1.50603	0.810137	1.85899	0.0630293	0.106254
																s__Acinetobacter virus Fri1	54.6398	-4.9067	0.402355	-12.1949	3.30728e-34	4.34136e-31
																s__Acinetobacter virus IME200	5.06797	-1.14602	0.672496	-1.70413	0.0883574	0.14272
																s__Acinetobacter virus PDAB9	19.1932	0.228132	0.725554	0.314425	0.753198	0.814762
																s__Escherichia virus APEC5	1.25906	0.776227	1.52513	0.508957	0.610783	0.69637
																s__Escherichia virus APEC7	65.1846	1.65391	0.88148	1.87629	0.0606158	0.102713
																s__Escherichia virus Bp4	181.925	1.347	0.321511	4.18959	2.79463e-05	0.000121203
																s__Escherichia virus ECBP1	3.07073	0.733789	0.946213	0.775501	0.438044	0.540588
																s__Escherichia virus G7C	153.796	0.0619428	0.400092	0.154821	0.876962	0.911208
																s__Escherichia virus IME11	74.0128	-0.301826	0.576434	-0.52361	0.60055	0.68749
																s__Shigella virus Sb1	51.1553	-1.89591	0.389426	-4.86847	1.12468e-06	6.61043e-06
																s__Pseudomonas virus F116	283.669	-0.814918	0.321379	-2.5357	0.0112224	0.0236583
																s__Escherichia virus Pollock	319.125	0.112813	0.393957	0.286358	0.774604	0.831169
																s__Salmonella virus FSL SP-058	99.5598	0.0210542	0.36854	0.0571287	0.954443	0.967783
																s__Salmonella virus FSL SP-076	93.1883	0.442472	0.783661	0.564621	0.572331	0.66348
																s__Erwinia virus Ea9-2	256.333	-1.1442	0.28017	-4.08396	4.42754e-05	0.000181811
																s__Erwinia virus Frozen	63.634	-2.35598	0.447737	-5.26198	1.42512e-07	1.00216e-06
																s__Achromobacter virus Axp3	1373.36	1.70878	0.350883	4.86994	1.11631e-06	6.57105e-06
																s__Achromobacter virus JWAlpha	939.653	-0.460316	0.246582	-1.86679	0.0619311	0.10467
																s__Edwardsiella virus KF1	29.894	2.44028	0.325183	7.50433	6.17431e-14	1.30024e-12
																s__Pseudoalteromonas phage PH1	59.8178	-1.33219	0.438856	-3.03561	0.00240053	0.00611468
																s__Vibrio phage VPMS1	345.619	0.872328	0.418806	2.08289	0.0372611	0.0671553
																s__Pseudomonas virus KPP25	169.587	1.34174	0.454286	2.95351	0.00314179	0.00771344
																s__Pseudomonas virus tf	220.303	-1.31064	0.459303	-2.85353	0.00432359	0.010294
																s__Escherichia virus 172-1	18.3983	2.54363	0.771317	3.29778	0.000974536	0.00276692
																s__Escherichia virus ECB2	425.893	-1.3149	0.462077	-2.84562	0.00443244	0.0104835
																s__Escherichia virus NJ01	0.00606687	0.34416	1.8816	0.182909	0.85487	NA
																s__Escherichia virus Septima11	267.667	-2.98613	0.367101	-8.13434	4.14188e-16	1.30486e-14
																s__Enterobacteria phage IME10	94.2384	0.763912	0.383986	1.98943	0.046654	0.0814738
																s__Enterobacteria phage Sf101	44.9899	-1.92551	0.791426	-2.43296	0.0149758	0.0305253
																s__Salmonella phage SEN22	3435.99	-1.32928	0.393174	-3.38088	0.000722535	0.00212656
																s__Salmonella phage SPN9CC	0.481285	0.574801	1.72251	0.333699	0.738607	0.803266
																s__Salmonella phage epsilon34	5179.63	-2.19749	0.529171	-4.1527	3.28574e-05	0.000140035
																s__Salmonella phage g341c	20.3891	-1.26737	0.654595	-1.93612	0.0528531	0.0909684
																s__Salmonella phage vB_SemP_Emek	251.296	0.592231	0.534685	1.10763	0.268023	0.364334
																s__Salmonella virus HK620	282.035	-3.27154	0.608661	-5.37498	7.65917e-08	5.71434e-07
																s__Salmonella virus SE1Spa	1.00227	-0.99672	1.27987	-0.778767	0.436117	0.538676
																s__Shigella virus Sf6	410.856	-2.72259	0.414428	-6.56952	5.04787e-11	6.83111e-10
																s__Burkholderia virus Bcep22	206.785	-0.412382	0.330935	-1.24611	0.212724	0.301117
																s__Burkholderia virus Bcepil02	1.92189	2.0082	1.57542	1.27471	0.202412	0.288804
																s__Burkholderia virus Bcepmigl	221.906	-4.10855	0.377508	-10.8834	1.38371e-27	2.59479e-25
																s__Burkholderia virus DC1	842.599	3.01049	0.631232	4.76922	1.84938e-06	1.02865e-05
																s__Cellulophaga virus Cba172	1335.63	-2.20535	0.514433	-4.28696	1.81137e-05	8.21794e-05
																s__Cellulophaga virus Cba41	92.9877	-0.0521606	0.333833	-0.156247	0.875838	0.91076
																s__Pseudomonas phage DL64	0	0	0	0	1	NA
																s__Pseudomonas phage Pa2	44.9484	-2.78437	0.383735	-7.25597	3.98783e-13	7.62333e-12
																s__Pseudomonas phage YH30	0.848059	1.47078	0.623081	2.3605	0.0182503	0.0362978
																s__Pseudomonas phage YH6	5.3059	-0.823532	0.830117	-0.992067	0.321165	0.422004
																s__Pseudomonas phage vB_PaeP_MAG4	35.6792	2.50056	0.644498	3.87985	0.000104521	0.000392751
																s__Pseudomonas virus LIT1	0.0476071	0.604989	1.8816	0.321529	0.747809	NA
																s__Pseudomonas virus KPP21	158.001	1.55727	0.341749	4.55677	5.19464e-06	2.63275e-05
																s__Pseudomonas virus LUZ7	711.502	2.09118	0.527503	3.96429	7.3614e-05	0.000285608
																s__Myxococcus virus Mx8	18.9788	-2.01215	0.63168	-3.18539	0.00144559	0.00391791
																s__Enterobacteria phage VT2phi_272	1410.1	-1.19372	0.365889	-3.26252	0.00110428	0.00309513
																s__Escherichia virus PA2	4.88456	-3.85165	0.931266	-4.13593	3.53521e-05	0.000149695
																s__Escherichia virus TL2011	2535.7	-3.07641	0.598182	-5.14293	2.70489e-07	1.81173e-06
																s__Shigella virus VASD	95.6975	-1.40253	0.563814	-2.48758	0.0128617	0.0266156
																s__Bacillus phage Pavlov	31.5778	2.51421	0.449224	5.59679	2.1836e-08	1.82958e-07
																s__Bacillus virus Page	0	0	0	0	1	NA
																s__Bacillus virus Palmer	1.84351	0.668548	1.86184	0.35908	0.719535	0.787713
																s__Bacillus virus Pascal	2.79899	0.521813	1.27445	0.409442	0.682216	0.756353
																s__Bacillus virus Pony	10.0545	-4.03422	0.626351	-6.44082	1.18827e-10	1.53423e-09
																s__Enterobacteria phage J8-65	0.0129903	0.306899	1.8816	0.163106	0.870435	NA
																s__Pantoea virus Limelight	1996.71	-3.33345	0.459841	-7.24914	4.19441e-13	7.94115e-12
																s__Pantoea virus Limezero	25.0293	0.841273	1.12137	0.75022	0.453122	0.554252
																s__Pseudomonas phage LKD16	164.207	3.08053	0.538971	5.71558	1.09333e-08	9.85246e-08
																s__Pseudomonas phage LUZ19	52.3933	1.39572	0.550366	2.53599	0.0112131	0.0236513
																s__Pseudomonas phage MPK6	89.1214	3.28901	0.417568	7.87658	3.36455e-15	8.65987e-14
																s__Pseudomonas phage phi-2	61.804	0.330218	0.460098	0.717714	0.472934	0.571292
																s__Pseudomonas phage phikF77	101.963	-3.78237	0.524465	-7.21186	5.5191e-13	1.00885e-11
																s__Pseudomonas phage vB_PaeP_PAO1_Ab05	95.0441	-1.09274	0.593443	-1.84135	0.0655702	0.109972
																s__Pseudomonas phage vB_PaeP_PPA-ABTNL	25.4314	-6.84394	1.11702	-6.12696	8.95761e-10	9.79863e-09
																s__Pseudomonas virus LKA1	203.338	1.04755	0.3812	2.74803	0.00599537	0.0136158
																s__Ralstonia phage RSB3	69.3902	-0.706091	0.46107	-1.53142	0.125666	0.192558
																s__Pectobacterium phage PP16	55.1319	-3.45879	0.438956	-7.87957	3.28498e-15	8.51069e-14
																s__Pectobacterium virus Peat1	64.483	0.866771	0.361304	2.39901	0.0164396	0.0331146
																s__Xylella phage Paz	44.6788	-1.56147	0.438728	-3.55907	0.000372166	0.00118609
																s__Xylella virus Prado	6.31403	-0.91372	0.624165	-1.46391	0.143219	0.215312
																s__Enterobacter phage phiEap-1	1.46084	0.904447	0.80166	1.12822	0.259228	0.353966
																s__Erwinia phage vB_EamP-L1	90.7599	-1.37904	0.632864	-2.17904	0.0293288	0.0549201
																s__Escherichia virus K30	126.654	2.86859	0.670679	4.27714	1.8931e-05	8.55914e-05
																s__Klebsiella virus K11	413.739	-1.49142	0.349204	-4.27091	1.94675e-05	8.78157e-05
																s__Klebsiella virus K5	3.19475	0.934485	0.672685	1.38919	0.164776	0.241813
																s__Klebsiella virus KP32	766.954	0.659153	0.346866	1.90031	0.0573928	0.0977142
																s__Klebsiella virus Kp1	0.509458	1.13534	1.47323	0.770648	0.440916	0.542772
																s__Klebsiella virus KpV289	261.163	1.33653	0.472515	2.82853	0.00467616	0.0109807
																s__Bordetella virus BPP1	70.4205	1.17905	0.491453	2.39911	0.016435	0.0331146
																s__Burkholderia virus BcepC6B	78.5738	0.697916	0.570318	1.22373	0.221054	0.310785
																s__Staphylococcus phage BP39	299.589	-1.75032	0.512606	-3.41456	0.000638858	0.00191755
																s__Staphylococcus phage GRCS	9.52837	-0.493949	0.704205	-0.701428	0.483036	0.580646
																s__Staphylococcus phage SAP-2	0.025185	0.232377	1.8816	0.1235	0.901711	NA
																s__Staphylococcus phage SLPW	0	0	0	0	1	NA
																s__Bacillus phage Aurora	0.507526	-1.73302	1.46664	-1.18163	0.237354	0.329236
																s__Bacillus phage Claudi	1.85709	-2.66619	1.87935	-1.41867	0.155994	0.231377
																s__Bacillus phage MG-B1	9.30672	2.03524	0.832438	2.44491	0.0144888	0.0295785
																s__Bacillus phage Stitch	0.572786	-1.55778	1.04135	-1.49593	0.134671	0.204211
																s__Bacillus virus B103	236.14	1.56375	0.339294	4.60885	4.04904e-06	2.08161e-05
																s__Bacillus virus GA1	170.315	3.05167	0.445517	6.84973	7.3992e-12	1.13378e-10
																s__Bacillus virus phi29	10.3033	-0.0215349	0.701223	-0.0307104	0.9755	0.98073
																s__Helicobacter phage phiHP33	33.1262	2.10746	0.398676	5.28614	1.24925e-07	8.86561e-07
																s__Helicobacter virus 1961P	45.084	1.38963	0.651558	2.13277	0.0329434	0.060312
																s__Citrobacter phage CR44b	14.1251	0.927596	0.4279	2.16779	0.0301748	0.0563168
																s__Citrobacter phage CR8	1222.48	0.801948	0.339629	2.36125	0.0182134	0.0362611
																s__Citrobacter phage SH1	0.00629624	0.34416	1.8816	0.182909	0.85487	NA
																s__Citrobacter phage SH3	1.05222	-0.8044	1.52553	-0.527293	0.59799	0.685556
																s__Citrobacter phage SH4	20.8749	-1.22963	1.06439	-1.15524	0.247992	0.341764
																s__Cronobacter phage Dev2	25.5596	-2.11173	0.726707	-2.9059	0.00366202	0.00886357
																s__Delftia phage IME-DE1	0	0	0	0	1	NA
																s__Enterobacteria phage 13a	1.02509	1.29486	1.51211	0.856323	0.391819	0.496092
																s__Enterobacteria phage 285P	20.1145	-3.22045	1.01802	-3.16343	0.00155923	0.00418273
																s__Enterobacteria phage EcoDS1	19.1925	-5.5266	0.75052	-7.36369	1.78893e-13	3.55798e-12
																s__Erwinia phage FE44	14.9128	-3.07019	0.526913	-5.82675	5.65163e-09	5.38889e-08
																s__Escherichia phage 64795_ec1	26.6235	0.0699734	0.395631	0.176865	0.859614	0.899554
																s__Escherichia phage CICC 80001	3.32199	1.94488	0.807246	2.40928	0.0159841	0.0323128
																s__Escherichia phage LM33_P1	11.6317	0.945273	1.67885	0.563049	0.573401	0.664525
																s__Escherichia phage P483	133.535	-1.44607	0.37691	-3.83664	0.000124728	0.000456063
																s__Escherichia phage P694	8.60317	-0.131006	0.53884	-0.243125	0.807908	0.857214
																s__Escherichia phage PE3-1	129.493	-1.3012	0.607986	-2.14018	0.03234	0.0595951
																s__Escherichia virus T7	33.8965	-0.554363	0.544803	-1.01755	0.308893	0.409845
																s__Kluyvera virus Kvp1	216.133	-0.288226	0.593225	-0.485863	0.627064	0.709592
																s__Morganella phage MmP1	180.74	3.03768	0.718818	4.22593	2.37952e-05	0.000104899
																s__Morganella phage vB_MmoP_MP2	0.231191	0.685459	1.88158	0.3643	0.715634	0.784786
																s__Pseudomonas phage PPPL-1	1.98229	1.81208	1.0361	1.74895	0.0802991	0.131211
																s__Pseudomonas phage PPpW-4	90.9061	0.27911	0.43506	0.641543	0.52117	0.615957
																s__Pseudomonas phage Pf-10	2.92355	3.47994	1.43307	2.42831	0.0151694	0.0308878
																s__Pseudomonas phage Phi-S1	93.498	0.235452	0.397295	0.592638	0.553424	0.645493
																s__Pseudomonas phage phi15	321.384	-0.489671	0.39103	-1.25226	0.210475	0.298793
																s__Pseudomonas phage phiIBB-PF7A	820.843	-0.171454	0.358564	-0.478168	0.632531	0.713727
																s__Pseudomonas virus gh1	4.79992	3.37888	0.558838	6.04627	1.48234e-09	1.56501e-08
																s__Ralstonia phage RSB2	96.5156	0.661242	0.456266	1.44925	0.147269	0.220009
																s__Salmonella phage Vi06	548.519	-1.47359	0.43342	-3.39991	0.000674075	0.00200491
																s__Stenotrophomonas phage IME15	0.0418676	0.232377	1.8816	0.1235	0.901711	NA
																s__Vibrio phage ICP3	30.3167	-1.27013	0.653241	-1.94435	0.0518533	0.0894038
																s__Vibrio phage N4	121.114	1.24343	0.586193	2.1212	0.0339052	0.0618142
																s__Vibriophage VP4	638.233	-2.29122	0.52674	-4.34982	1.36249e-05	6.37987e-05
																s__Yersinia phage Yepe2	641.099	-3.01881	0.361789	-8.34412	7.17456e-17	2.56849e-15
																s__Yersinia phage phiA1122	12.0189	1.97847	1.31838	1.50069	0.133437	0.202651
																s__Yersinia phage vB_YenP_AP10	186.249	2.02258	0.516283	3.91758	8.94441e-05	0.000340649
																s__Escherichia Stx1 converting phage	5.08291	0.157958	1.0105	0.156317	0.875783	0.91076
																s__Escherichia virus 24B	39.0795	-0.823516	0.565544	-1.45615	0.145352	0.217889
																s__Escherichia virus Min27	19.7614	5.8416	1.29478	4.51166	6.43228e-06	3.20904e-05
																s__Escherichia virus Stx2 II	0.869004	-1.16691	1.86339	-0.62623	0.531164	0.625703
																s__Stx2-converting phage 86	731.743	-0.943966	0.4611	-2.04721	0.0406379	0.0723472
																s__Enterobacter phage Tyrion	217.458	0.768883	0.405807	1.8947	0.0581321	0.0988873
																s__Escherichia phage TL-2011b	4692.17	-2.98828	0.530148	-5.6367	1.73337e-08	1.49693e-07
																s__Escherichia virus phiV10	82.6398	-2.03962	0.410286	-4.97123	6.65302e-07	4.13896e-06
																s__Salmonella virus Epsilon15	16.5822	-1.09089	0.5884	-1.854	0.0637397	0.107268
																s__Salmonella virus SPN1S	145.941	0.409957	0.471515	0.869446	0.384603	0.488098
																s__Acinetobacter phage Presley	801.518	0.143564	0.391303	0.366887	0.713703	0.783105
																s__Actinomyces virus Av1	133.896	2.22517	0.381628	5.83074	5.51832e-09	5.27455e-08
																s__Aeromonas phage phiAS7	0	0	0	0	1	NA
																s__Alteromonas phage vB_AmaP_AD45-P	271.23	0.410471	0.421036	0.974908	0.329606	0.431288
																s__Anabaena phage A-4L	4816.4	0.224828	0.257195	0.874153	0.382035	0.485696
																s__Aurantimonas phage AmM-1	23.6238	1.01808	0.519511	1.95968	0.050033	0.086721
																s__Bacteriophage APSE-2	96.9176	-0.849793	0.608533	-1.39646	0.162575	0.239246
																s__Burkholderia phage JG068	0.320463	0.615541	1.88156	0.327143	0.743559	0.807539
																s__Celeribacter phage P12053L	25.9048	-3.47377	0.910637	-3.81466	0.000136371	0.000489434
																s__Cellulophaga phage phi13:2	51.6322	0.620155	0.407104	1.52334	0.127675	0.195104
																s__Cellulophaga phage phi18:3	47.6087	2.16916	0.495267	4.37977	1.18803e-05	5.6367e-05
																s__Cellulophaga phage phi19:3	7.87592	0.818021	0.810385	1.00942	0.312772	0.413877
																s__Cellulophaga phage phi38:1	2198.7	0.510063	0.297762	1.71299	0.0867142	0.140701
																s__Cellulophaga phage phi46:3	348.62	-1.03209	0.273559	-3.77285	0.000161394	0.000568998
																s__Citrobacter phage CVT22	28.5593	-0.0829482	0.344935	-0.240475	0.809962	0.857761
																s__Clostridium phage phi24R	0	0	0	0	1	NA
																s__Clostridium phage phiZP2	432.368	1.19777	0.341725	3.50506	0.000456506	0.00141664
																s__Cronobacter phage Dev-CD-23823	628.938	-0.59542	0.236654	-2.516	0.0118696	0.0247577
																s__Cronobacter phage vB_CsaP_GAP52	4775.47	2.88495	0.548262	5.262	1.425e-07	1.00216e-06
																s__Cronobacter phage vB_CskP_GAP227	1539.01	2.12501	0.716739	2.96483	0.00302848	0.0074913
																s__Cyanophage 9515-10a	31.4722	-0.0424402	0.304176	-0.139525	0.889035	0.920594
																s__Cyanophage NATL1A-7	645.963	-0.574968	0.268856	-2.13857	0.0324702	0.0598071
																s__Cyanophage SS120-1	92.389	0.766513	0.516969	1.48271	0.138153	0.208927
																s__Delftia phage RG-2014	1735.25	0.810379	0.40392	2.00629	0.0448254	0.0785942
																s__Enterobacter phage EcP1	393.496	-0.149898	0.404458	-0.370615	0.710924	0.780788
																s__Enterococcus phage EF62phi	0.0844372	-0.104073	1.88159	-0.0553113	0.95589	NA
																s__Enterococcus phage vB_EfaP_IME195	7.80723	0.264652	0.619689	0.427072	0.669327	0.746107
																s__Erwinia phage PEp14	788.592	-0.68016	0.296909	-2.2908	0.0219749	0.0425453
																s__Erwinia phage vB_EamP-S6	604.978	-0.897875	0.370411	-2.42399	0.0153508	0.0312089
																s__Escherichia phage phiKT	321.791	-2.37012	0.535171	-4.42872	9.47925e-06	4.55791e-05
																s__Hamiltonella virus APSE1	2.44802	-2.60199	1.17078	-2.22245	0.0262532	0.0500028
																s__Lactoccocus phage WP-2	6.27835	-3.89279	1.10694	-3.5167	0.000436954	0.00136457
																s__Lactococcus phage asccphi28	31.0739	0.0812672	0.545241	0.149048	0.881516	0.914407
																s__Lactococcus virus KSY1	12.0158	-1.45586	0.693278	-2.09997	0.0357316	0.064784
																s__Liberibacter phage SC1	6.3177	1.73387	1.42196	1.21936	0.222709	0.312743
																s__Liberibacter phage SC2	29.0795	-0.588932	0.507067	-1.16145	0.24546	0.339285
																s__Mesorhizobium phage vB_MloP_Lo5R7ANS	294.335	2.38375	0.473387	5.03551	4.76572e-07	3.027e-06
																s__Mycoplasma virus P1	18.1714	-2.68855	0.542446	-4.95634	7.18324e-07	4.42685e-06
																s__Pelagibacter phage HTVC010P	3.38475	1.62984	1.31179	1.24245	0.214071	0.302915
																s__Pelagibacter phage HTVC011P	4923.15	1.66375	0.359965	4.62198	3.80097e-06	1.96692e-05
																s__Pelagibacter phage HTVC019P	211.173	2.52334	0.278438	9.06248	1.27521e-19	7.27791e-18
																s__Phormidium virus WMP3	6.69483	1.00811	1.31796	0.7649	0.444331	0.545872
																s__Phormidium virus WMP4	37.4907	0.0642512	0.733386	0.087609	0.930187	0.948493
																s__Planktothrix phage PaV-LD	460.314	-1.96677	0.455829	-4.31471	1.59813e-05	7.37799e-05
																s__Podovirus Lau218	30.5685	3.84098	0.596797	6.43599	1.22671e-10	1.57355e-09
																s__Prochlorococcus phage P-GSP1	563.534	0.444243	0.403537	1.10087	0.270952	0.367427
																s__Prochlorococcus phage P-SSP10	20.6122	-3.30276	0.484899	-6.81123	9.67685e-12	1.46567e-10
																s__Prochlorococcus virus PSSP7	1568.9	-2.02415	0.535703	-3.7785	0.000157777	0.000558746
																s__Proteus phage PM 75	231.585	1.27997	0.523259	2.44614	0.0144394	0.0294929
																s__Proteus phage PM16	22.9928	2.76877	0.678766	4.07912	4.52066e-05	0.000185056
																s__Pseudoalteromonas phage RIO-1	248.917	-3.09949	0.392893	-7.88888	3.049e-15	8.00464e-14
																s__Pseudoalteromonas phage pYD6-A	33.9278	-2.12321	0.509722	-4.16543	3.10771e-05	0.000133751
																s__Pseudomonas phage AF	3391.24	-1.96275	0.500781	-3.91938	8.87784e-05	0.000339009
																s__Pseudomonas phage PaP2	12.2129	-1.45806	0.351842	-4.14406	3.41204e-05	0.000144947
																s__Pseudomonas phage YMC11/06/C171_PPU_BP	55.5804	-1.65139	0.460902	-3.58295	0.000339738	0.00109573
																s__Puniceispirillum phage HMO-2011	630.337	0.452001	0.269386	1.6779	0.0933675	0.149646
																s__Ralstonia phage RSB1	16.6877	1.91272	0.639973	2.98874	0.00280128	0.0069952
																s__Ralstonia phage RSJ2	0.00977036	0.418683	1.8816	0.222515	0.823913	NA
																s__Ralstonia phage RSJ5	397.142	0.895307	0.291102	3.07558	0.00210097	0.00545033
																s__Ralstonia phage RSK1	251.823	0.810253	0.403666	2.00724	0.0447246	0.0784873
																s__Rhodoferax phage P26218	294.056	0.485467	0.334013	1.45344	0.146101	0.218797
																s__Roseobacter virus SIO1	134.034	-0.0882513	0.872386	-0.101161	0.919423	0.940438
																s__Salinivibrio phage CW02	535.502	-0.0702818	0.326249	-0.215424	0.829437	0.874517
																s__Salmonella phage 7-11	1412.36	-0.465921	0.284725	-1.63639	0.101758	0.160689
																s__Sinorhizobium phage PBC5	530.409	-0.610241	0.332986	-1.83263	0.0668572	0.111893
																s__Sodalis phage phiSG1	5347.36	2.53148	0.638043	3.96756	7.26118e-05	0.000281997
																s__Synechococcus phage S-CBP1	1006.16	-2.52633	0.293978	-8.59359	8.42912e-18	3.38713e-16
																s__Synechococcus phage S-CBP2	1.35528	-0.336533	0.937796	-0.358855	0.719704	0.787713
																s__Synechococcus phage S-CBP3	90.8423	-2.34866	0.447263	-5.25117	1.51135e-07	1.05395e-06
																s__Synechococcus phage S-CBP4	1152.53	1.31039	0.459928	2.84912	0.00438401	0.0104064
																s__Synechococcus phage S-CBP42	187.881	-3.30364	0.544169	-6.07099	1.27128e-09	1.36411e-08
																s__Synechococcus phage S-RIP1	136.858	-0.385589	0.378247	-1.01941	0.308008	0.408809
																s__Synechococcus phage S-RIP2	44.5827	1.2926	0.392381	3.29424	0.000986872	0.0027959
																s__Synechococcus virus P60	40.8502	-1.27105	0.431525	-2.94549	0.00322446	0.00788692
																s__Synechococcus virus Syn5	443.629	2.80327	0.403117	6.95399	3.55084e-12	5.75441e-11
																s__Thalassomonas phage BA3	49.1273	-0.950206	0.356788	-2.66322	0.0077396	0.0170656
																s__Vibrio phage CHOED	419.295	2.00446	0.313198	6.39998	1.55397e-10	1.95512e-09
																s__Vibrio phage ICP2	3224.55	3.19554	0.802183	3.98355	6.7892e-05	0.000267
																s__Vibrio phage ICP2_2013_A_Haiti	35.7396	-4.36233	0.808456	-5.39588	6.81875e-08	5.15398e-07
																s__Vibrio phage JA-1	410.427	-0.529276	0.402648	-1.31449	0.188683	0.271477
																s__Vibrio phage PVA1	2043.12	-0.650108	0.736501	-0.882697	0.3774	0.481283
																s__Vibrio phage VP93	12.9973	-0.57353	0.569405	-1.00724	0.313817	0.414841
																s__Vibrio phage VvAW1	27.1519	-3.95592	0.969434	-4.08065	4.49092e-05	0.00018403
																s__Vibrio phage phi 1	3.94836	-3.45765	1.35735	-2.54734	0.0108547	0.0229816
																s__Vibrio virus VpV262	54.0104	2.3095	0.452325	5.10583	3.29341e-07	2.16518e-06
																s__Weissella phage phiYS61	10.4564	0.310112	1.37575	0.225412	0.821658	0.86766
																s__Xanthomonas citri phage CP2	7.40292	-4.04026	0.67745	-5.96392	2.46253e-09	2.52538e-08
																s__Xylella phage Xfas53	254.772	-0.203148	0.392045	-0.518175	0.604336	0.691012
																s__Yersinia phage phi80-18	0.963792	-2.49304	1.21693	-2.04864	0.0404978	0.0721303
																s__Yersinia phage vB_YenP_ISAO8	51.9329	3.30978	1.08083	3.06225	0.00219678	0.00565051
																s__Pseudomonas virus UFVP2	385.022	0.708638	0.221669	3.19683	0.00138947	0.00378144
																s__Enterobacteria phage UAB_Phi78	15.826	1.72222	0.852961	2.0191	0.0434764	0.076707
																s__Enterobacteria phage vB_EcoP_ACG-C91	59.8688	0.870381	0.534399	1.62871	0.103374	0.162705
																s__Erwinia phage phiEa100	17.0042	-2.90441	1.16877	-2.485	0.012955	0.0267946
																s__Erwinia virus Era103	67.3424	1.50154	0.450696	3.3316	0.000863483	0.00248023
																s__Escherichia phage ECBP5	177.741	-0.165381	0.387823	-0.426434	0.669792	0.746107
																s__Escherichia virus K1-5	146.419	1.97763	0.45148	4.38032	1.18504e-05	5.62929e-05
																s__Escherichia virus K1E	112.198	-0.489961	0.572278	-0.856158	0.39191	0.496092
																s__Lelliottia phage phD2B	2101.43	1.88772	0.445914	4.23338	2.30203e-05	0.000102088
																s__Pectobacterium phage PP1	367.364	1.40525	0.372702	3.77043	0.000162968	0.000573894
																s__Proteus phage PM 85	1.7336	0.443837	1.87795	0.236341	0.813168	0.860128
																s__Proteus phage PM 93	26.1127	-3.75506	0.660039	-5.68915	1.27675e-08	1.12985e-07
																s__Salmonella virus SP6	2525.6	1.06806	0.321835	3.31865	0.000904534	0.00258495
																s__Vibrio phage phi-A318	795.04	1.05774	0.495712	2.13378	0.0328604	0.0601978
																s__Pseudomonas virus Ab18	275.543	2.58379	0.463351	5.57631	2.45671e-08	2.04535e-07
																s__Pseudomonas virus PaMx11	212.81	2.94758	0.379197	7.77322	7.65157e-15	1.84858e-13
																s__Mycobacterium phage Phelemich	501.629	1.483	0.371897	3.98767	6.67249e-05	0.000263289
																s__Mycobacterium virus Acadian	4215.28	3.07093	0.543383	5.6515	1.59052e-08	1.3888e-07
																s__Mycobacterium virus Baee	1005.98	-1.88998	0.433085	-4.36398	1.27714e-05	6.00884e-05
																s__Burkholderia virus AH2	157.491	-0.665373	0.326804	-2.036	0.0417505	0.0740267
																s__Bacillus virus Eoghan	109.399	-0.275602	0.468054	-0.588826	0.555978	0.64719
																s__Bacillus virus Finn	6.82405	3.01937	1.09202	2.76494	0.00569333	0.0130275
																s__Bacillus virus Glittering	77.1738	-2.39806	0.495091	-4.84367	1.27464e-06	7.41435e-06
																s__Bacillus virus Riggi	5.35054	0.0520227	0.873559	0.0595526	0.952512	0.967249
																s__Streptomyces virus R4	129.862	-3.87376	0.49404	-7.841	4.46966e-15	1.1283e-13
																s__Gordonia phage SoilAssassin	5.13723	0.921541	0.79807	1.15471	0.248209	0.341764
																s__Gordonia virus Bantam	434.573	-1.54986	0.604334	-2.56457	0.0103304	0.0220016
																s__Mycobacterium phage Oaker	0.0387763	0.493205	1.8816	0.26212	0.793229	NA
																s__Mycobacterium virus Barnyard	257.864	1.85925	0.414303	4.48766	7.20083e-06	3.54018e-05
																s__Mycobacterium virus Konstantine	312.374	0.158154	0.414749	0.381325	0.702962	0.774223
																s__Mycobacterium virus Predator	88.818	2.53477	0.56277	4.5041	6.66557e-06	3.30592e-05
																s__Gordonia virus BaxterFox	86.8228	3.71706	0.613113	6.0626	1.33935e-09	1.42937e-08
																s__Gordonia virus Yeezy	4.38477	4.80634	1.26252	3.80693	0.0001407	0.00050188
																s__Pseudomonas virus B3	7.59178	-1.87447	0.665985	-2.81458	0.00488405	0.0113807
																s__Pseudomonas virus PM105	81.2914	1.95146	0.25187	7.74789	9.34313e-15	2.21646e-13
																s__Gordonia virus GMA6	68.1709	-3.93687	0.464059	-8.48356	2.18416e-17	8.2704e-16
																s__Mycobacterium virus Bernal13	2510.09	0.835175	0.238471	3.50221	0.000461419	0.00143076
																s__Gordonia virus BetterKatz	736.185	-0.931692	0.442382	-2.10608	0.0351974	0.0640366
																s__Mycobacterium virus Bignuz	54.4505	0.850201	0.396766	2.14283	0.0321271	0.0592862
																s__Staphylococcus phage 2638A	7.51193	2.73112	0.586024	4.66042	3.15568e-06	1.6703e-05
																s__Staphylococcus phage JS01	0.134183	-0.394326	1.88152	-0.209578	0.833997	NA
																s__Staphylococcus phage PVL	11.3885	-4.00634	0.923332	-4.339	1.43133e-05	6.65477e-05
																s__Staphylococcus phage StauST398-4	1.15237	-0.837674	1.03489	-0.809431	0.418267	0.521411
																s__Staphylococcus phage phi5967PVL	0.0898436	0.157855	1.8816	0.0838939	0.933141	NA
																s__Staphylococcus phage phiBU01	42.5682	0.125269	0.39583	0.316471	0.751645	0.813628
																s__Staphylococcus phage phiRS7	0.199341	0.460502	1.88158	0.244743	0.806655	NA
																s__Staphylococcus phage phiSa119	1.00556	-1.01396	1.39347	-0.727649	0.466828	0.566698
																s__Staphylococcus virus 108PVL	28.3243	-3.46687	0.576265	-6.0161	1.78666e-09	1.86628e-08
																s__Mycobacterium phage PegLeg	206.363	-0.108777	0.34782	-0.312739	0.754479	0.815575
																s__Gordonia phage Schwabeltier	54.1141	-0.989397	0.566176	-1.74751	0.0805494	0.131456
																s__Gordonia virus Bowser	40.7138	-1.0854	0.452861	-2.39678	0.0165401	0.033283
																s__Gordonia virus Britbrat	617.453	0.871939	0.510295	1.70869	0.0875077	0.141723
																s__Mycobacterium phage Archie	171.971	1.63427	0.375509	4.35216	1.34804e-05	6.31972e-05
																s__Mycobacterium phage Crossroads	0.259958	0.520017	1.38985	0.374154	0.70829	0.778901
																s__Mycobacterium phage Lolly9	18.5874	0.913897	0.477969	1.91204	0.0558707	0.0954528
																s__Mycobacterium phage Snenia	318.464	-0.553697	0.272684	-2.03054	0.0423016	0.074893
																s__Mycobacterium phage Whirlwind	723.896	3.52759	0.49211	7.16828	7.59431e-13	1.36559e-11
																s__Mycobacterium virus Bron	4440.68	0.544202	0.213597	2.5478	0.0108406	0.022964
																s__Mycobacterium virus Rumpelstiltskin	0.862863	1.28862	1.10393	1.1673	0.243091	0.336956
																s__Mycobacterium virus Babsiella	3.86139	-1.83412	1.03744	-1.76793	0.0770727	0.126727
																s__Mycobacterium virus Brujita	0.0959558	0.34416	1.8816	0.182909	0.85487	NA
																s__Streptococcus phage 20617	4786.49	-0.117381	0.282529	-0.415463	0.677803	0.753369
																s__Streptococcus phage TP-778L	133.823	-1.22618	0.43583	-2.81345	0.00490136	0.0114143
																s__Streptococcus phage TP-J34	5.59123	-4.63964	0.838332	-5.53437	3.12353e-08	2.53096e-07
																s__Streptococcus virus 2972	0.353362	-0.858075	1.71933	-0.499075	0.617726	0.702678
																s__Streptococcus virus 858	0.0482015	0.157855	1.8816	0.0838939	0.933141	NA
																s__Streptococcus virus ALQ132	188.536	-2.68724	0.266531	-10.0823	6.61499e-24	6.51246e-22
																s__Streptococcus virus O1205	18.9889	-1.57358	0.63373	-2.48305	0.0130264	0.0269281
																s__Streptococcus virus Sfi11	2.81649	-2.85468	1.01715	-2.80654	0.00500766	0.0116206
																s__Mycobacterium virus Butters	8.60751	-4.89489	1.59543	-3.06807	0.00215443	0.00555675
																s__Mycobacterium virus Michelle	72.8029	1.5919	0.538254	2.95752	0.00310127	0.007633
																s__Streptomyces virus Amela	102.698	0.615751	0.390783	1.57568	0.115099	0.178308
																s__Pseudomonas phage JBD69	239.135	0.424121	0.369827	1.14681	0.25146	0.345155
																s__Pseudomonas phage JBD93	9.43535	-0.704348	0.611697	-1.15147	0.249541	0.343358
																s__Pseudomonas phage MP48	0.40185	-0.873274	1.73186	-0.504241	0.614092	0.699535
																s__Pseudomonas phage vB_PaeS_PAO1_Ab30	0	0	0	0	1	NA
																s__Pseudomonas virus LPB1	2.29297	-2.68689	1.87916	-1.42983	0.152765	0.227305
																s__Pseudomonas virus MP38	21.9933	-0.169561	0.446072	-0.380121	0.703856	0.774674
																s__Cellulophaga virus ST	176.074	0.573587	0.319214	1.79687	0.0723557	0.119872
																s__Bacillus virus 250	264.797	-4.42348	0.459335	-9.63019	5.96178e-22	4.60343e-20
																s__Lactococcus phage D4410	152.704	-4.40379	0.711488	-6.18955	6.03364e-10	6.78362e-09
																s__Lactococcus virus bIL67	0.461191	0.233051	1.68933	0.137954	0.890277	0.921638
																s__Lactococcus virus c2	36.7189	-3.7646	0.619775	-6.07414	1.24653e-09	1.34121e-08
																s__Lactobacillus virus LLKu	317.5	1.03943	0.507975	2.04621	0.0407354	0.072488
																s__Lactobacillus virus Ld17	8.57877	1.1376	0.722638	1.57423	0.115433	0.178616
																s__Lactobacillus virus Ld25A	168.902	0.790265	0.638177	1.23832	0.215599	0.30442
																s__Lactobacillus virus c5	0.389322	1.31891	1.88122	0.701094	0.483245	0.580719
																s__Lactobacillus virus phiLdb	78.1945	-0.134235	0.350838	-0.382614	0.702006	0.773503
																s__Vibrio virus pVp1	3902.34	1.21872	0.298486	4.08301	4.44561e-05	0.000182363
																s__Mycobacterium virus Xeno	200.406	1.02183	0.328755	3.10818	0.00188245	0.00493876
																s__Mycobacterium virus Che9c	18.8322	0.974825	0.394467	2.47124	0.0134644	0.0276881
																s__Mycobacterium virus Sbash	2929.05	-0.00482595	0.332496	-0.0145143	0.98842	0.990432
																s__Mycobacterium phage Brocalys	228.175	0.914573	0.490756	1.8636	0.0623778	0.105246
																s__Mycobacterium phage BuzzLyseyear	1.9508	3.36375	0.981028	3.42881	0.000606242	0.00182801
																s__Mycobacterium phage Dante	13.7289	-2.54715	0.667938	-3.81345	0.000137041	0.000490606
																s__Mycobacterium phage Hamulus	2.83764	-1.41131	0.774933	-1.8212	0.0685764	0.11443
																s__Mycobacterium phage Jabbawokkie	0.0542183	0.195116	1.8816	0.103697	0.91741	NA
																s__Mycobacterium phage Job42	4.01387	-0.618671	1.10859	-0.558069	0.576797	0.667282
																s__Mycobacterium phage Llama	12.8858	-1.59089	0.642111	-2.47758	0.0132275	0.0272865
																s__Mycobacterium phage PopTart	1.55324	1.06528	0.929667	1.14587	0.251848	0.345446
																s__Mycobacterium phage Quico	551.201	2.32744	0.985887	2.36076	0.0182377	0.0362912
																s__Mycobacterium phage Seagreen	6.20262	-3.98145	0.851427	-4.67621	2.92231e-06	1.55941e-05
																s__Mycobacterium phage SiSi	127.61	-0.650198	0.396076	-1.6416	0.100673	0.159345
																s__Mycobacterium phage Squirty	22.8715	2.79454	0.459712	6.07889	1.21014e-09	1.30562e-08
																s__Mycobacterium phage WIVsmall	0.592087	2.02783	1.88067	1.07825	0.280922	0.378859
																s__Mycobacterium virus Avani	38.815	3.60116	0.703585	5.1183	3.08302e-07	2.04049e-06
																s__Mycobacterium virus Boomer	3.23624	-0.29399	1.74841	-0.168148	0.866467	0.904359
																s__Mycobacterium virus Che8	57.6382	3.15685	0.541255	5.83247	5.46122e-09	5.23267e-08
																s__Mycobacterium virus Che9d	101.535	-0.868756	0.375663	-2.31259	0.020745	0.0403825
																s__Mycobacterium virus Deadp	6.19444	2.90822	0.905973	3.21005	0.00132711	0.00364193
																s__Mycobacterium virus Fruitloop	2.56451	2.48721	0.704775	3.52908	0.000417007	0.00131164
																s__Mycobacterium virus Gumbie	514.808	0.433171	0.564346	0.767564	0.442746	0.544344
																s__Mycobacterium virus Llij	1.4509	-2.55525	1.61545	-1.58176	0.113705	0.176565
																s__Mycobacterium virus Pacc40	2.55167	3.58679	1.13021	3.17356	0.0015058	0.00405322
																s__Mycobacterium virus Ramsey	380.508	-1.61017	0.537722	-2.99443	0.00274959	0.00687921
																s__Mycobacterium virus SG4	0.768291	-1.81986	1.87993	-0.968047	0.333021	0.435259
																s__Mycobacterium virus Tweety	1.8042	2.13038	0.756904	2.8146	0.0048838	0.0113807
																s__Enterobacter phage Enc34	665.008	-0.721704	0.445697	-1.61927	0.105389	0.165151
																s__Proteus phage pPM_01	357.712	-0.358033	0.265462	-1.34872	0.177428	0.257257
																s__Providencia phage Redjac	233.173	-0.0449731	0.358166	-0.125565	0.900076	0.929339
																s__Salmonella phage 118970_sal1	188.823	2.30978	0.452773	5.10141	3.37137e-07	2.20906e-06
																s__Salmonella phage 37	119.091	-2.0676	0.546344	-3.78442	0.000154067	0.000547578
																s__Salmonella virus Chi	4.80183	2.22632	0.929176	2.39601	0.0165745	0.0333353
																s__Salmonella virus FSLSP030	128.063	1.74917	0.64736	2.702	0.00689229	0.0154127
																s__Salmonella virus FSLSP088	98.01	-1.91636	0.569637	-3.36419	0.000767699	0.0022444
																s__Corynebacterium virus P1201	461.439	-0.168756	0.330412	-0.510745	0.60953	0.695546
																s__Clavibacter virus CMP1	114.123	-0.726079	0.459011	-1.58183	0.113687	0.176565
																s__Clavibacter virus CN1A	180.412	1.31376	0.395218	3.32414	0.000886922	0.00254384
																s__Lactobacillus virus ATCC8014	47.1662	-0.86734	0.600707	-1.44386	0.148777	0.222077
																s__Lactobacillus virus phiJL1	10.1317	-2.42873	0.590012	-4.11641	3.84817e-05	0.000160871
																s__Mycobacterium virus Adawi	622.963	1.7599	0.597779	2.94407	0.00323926	0.0079182
																s__Mycobacterium virus Bane1	727.619	1.03939	0.264105	3.9355	8.30237e-05	0.000318922
																s__Mycobacterium virus BrownCNA	141.042	1.56389	0.376277	4.15622	3.2355e-05	0.000138343
																s__Mycobacterium virus Cooper	77.0397	1.06932	0.516927	2.0686	0.0385836	0.069218
																s__Mycobacterium virus JAMaL	145.77	-2.17833	0.556935	-3.91129	9.18045e-05	0.000348291
																s__Mycobacterium virus Nigel	1.33865	2.90195	1.35075	2.1484	0.0316818	0.0586843
																s__Mycobacterium virus Stinger	483.295	2.06906	0.382758	5.40566	6.45707e-08	4.90887e-07
																s__Mycobacterium virus Vincenzo	19.4953	-0.781733	0.879813	-0.888521	0.37426	0.478363
																s__Mycobacterium phage Catdawg	76.9735	1.6244	0.593744	2.73586	0.00622184	0.0140976
																s__Mycobacterium phage Dylan	24.9537	3.24275	0.843652	3.84371	0.000121189	0.000445187
																s__Mycobacterium virus Corndog	0	0	0	0	1	NA
																s__Enterobacter phage phiEap-2	4922.47	1.09681	0.298733	3.67154	0.000241091	0.000807326
																s__Salmonella virus SP31	113.172	0.488122	0.504798	0.966965	0.333562	0.435677
																s__Rhodobacter virus RcCronus	113.861	0.664334	0.453187	1.46592	0.142671	0.214606
																s__Arthrobacter virus Decurro	270.797	1.23102	0.417271	2.95016	0.00317608	0.00779277
																s__Gordonia virus Demosthenes	42.9946	0.833356	0.48433	1.72064	0.0853168	0.138662
																s__Gordonia virus Kvothe	59.6245	1.00795	0.636871	1.58267	0.113497	0.176422
																s__Pseudomonas virus D3	573.557	2.9424	0.375602	7.83381	4.73314e-15	1.1872e-13
																s__Escherichia phage Envy	10.8318	0.261442	0.850405	0.307432	0.758515	0.81906
																s__Escherichia phage slur05	0.0386877	0.493205	1.8816	0.26212	0.793229	NA
																s__Escherichia virus EK99P1	248.976	2.02782	0.487397	4.16051	3.17537e-05	0.000136067
																s__Escherichia virus JL1	3.35718	-3.89509	1.19265	-3.26591	0.00109114	0.00306049
																s__Escherichia virus SSL2009a	109.548	1.57218	0.370825	4.23968	2.23841e-05	9.96029e-05
																s__Shigella virus EP23	951.274	-2.61643	0.39688	-6.5925	4.32483e-11	5.87282e-10
																s__Sodalis virus SO1	17.1862	0.734824	0.73759	0.996249	0.319129	0.42003
																s__Enterobacteria phage vB_EcoS_NBD2	3375.13	0.26003	0.177191	1.46751	0.142237	0.214266
																s__Enterococcus phage IME-EFm1	116.091	-0.608655	0.308815	-1.97093	0.0487314	0.084726
																s__Enterococcus phage IME-EFm5	73.1493	-0.65863	0.430949	-1.52832	0.126432	0.193581
																s__Enterococcus virus EF3	364.434	-0.0983759	0.322576	-0.30497	0.760389	0.820269
																s__Enterococcus virus EfaCPT1	136.395	-3.75121	0.341425	-10.9869	4.41598e-28	8.69506e-26
																s__Enterococcus virus SANTOR1	227.018	-3.21347	0.791755	-4.05866	4.93546e-05	0.000200163
																s__Edwardsiella phage eiAU-183	25.4117	1.36166	0.377352	3.60844	0.000308038	0.00100585
																s__Gordonia virus Cozz	522.966	-0.634194	0.38771	-1.63574	0.101894	0.160825
																s__Gordonia virus Emalyn	12.939	-0.940064	0.509045	-1.84672	0.0647876	0.108845
																s__Gordonia virus GTE2	403.389	-2.35937	0.555049	-4.25074	2.13063e-05	9.52376e-05
																s__Gordonia virus Eyre	2862.41	-1.49073	0.464505	-3.20929	0.00133064	0.00364907
																s__Mycobacterium virus Brusacoram	18.1515	1.86747	0.464908	4.01686	5.89792e-05	0.000236517
																s__Mycobacterium virus Donovan	9.00467	-2.55724	0.440155	-5.80987	6.25223e-09	5.93284e-08
																s__Mycobacterium phage 40AC	533.364	1.96532	0.418341	4.6979	2.62849e-06	1.41794e-05
																s__Mycobacterium phage Adzzy	317.486	0.312282	0.512754	0.609029	0.542505	0.635829
																s__Mycobacterium phage Alsfro	2.25124	0.171785	1.12898	0.15216	0.879061	0.912907
																s__Mycobacterium phage AnnaL29	156.938	1.17888	0.467614	2.52106	0.0117002	0.0244821
																s__Mycobacterium phage Anubis	3.68047	-2.11688	0.594478	-3.56091	0.000369573	0.00118036
																s__Mycobacterium phage ArcherNM	54.2635	2.2816	0.410369	5.55987	2.69973e-08	2.22417e-07
																s__Mycobacterium phage Artemis2UCLA	154.811	-3.41686	0.394368	-8.66413	4.54961e-18	1.906e-16
																s__Mycobacterium phage BTCU-1	712.312	1.52053	0.322113	4.72046	2.35307e-06	1.27812e-05
																s__Mycobacterium phage Bactobuster	18.3945	-2.64805	0.716706	-3.69476	0.000220097	0.000745693
																s__Mycobacterium phage Barriga	0.40464	0.44755	1.65639	0.270196	0.787009	0.840587
																s__Mycobacterium phage BellusTerra	2.8818	0.857244	0.855283	1.00229	0.316202	0.417293
																s__Mycobacterium phage Blue7	18.3591	1.02825	0.578809	1.77649	0.0756516	0.12486
																s__Mycobacterium phage CRB1	0.502201	1.499	1.23838	1.21046	0.226104	0.316193
																s__Mycobacterium phage Catalina	97.2821	0.40612	0.967314	0.419843	0.6746	0.750101
																s__Mycobacterium phage Chadwick	683.925	-2.45742	0.467136	-5.2606	1.43582e-07	1.00789e-06
																s__Mycobacterium phage Chy5	0.812785	0.0330823	1.81016	0.0182759	0.985419	0.987927
																s__Mycobacterium phage Conspiracy	26.2075	-5.81582	0.717135	-8.10981	5.06995e-16	1.57208e-14
																s__Mycobacterium phage EagleEye	40.4808	-2.01095	0.301183	-6.67683	2.44166e-11	3.43402e-10
																s__Mycobacterium phage Echild	1251.49	2.92161	0.763343	3.82739	0.000129507	0.000470479
																s__Mycobacterium phage Equemioh13	123.412	3.62827	0.719924	5.03979	4.66039e-07	2.96968e-06
																s__Mycobacterium phage EvilGenius	357.526	-1.61352	0.323804	-4.98301	6.26013e-07	3.9318e-06
																s__Mycobacterium phage First	0.936845	-0.0732392	1.45756	-0.0502478	0.959925	0.971579
																s__Mycobacterium phage Fredward	22.7659	0.9147	0.919157	0.995152	0.319662	0.420591
																s__Mycobacterium phage Gompeii16	17.3013	1.68795	0.393193	4.29292	1.76338e-05	8.03725e-05
																s__Mycobacterium phage Graduation	45.6906	1.89846	0.463411	4.09671	4.19066e-05	0.000173349
																s__Mycobacterium phage HINdeR	514.985	1.57299	0.33004	4.76607	1.87851e-06	1.04338e-05
																s__Mycobacterium phage HanShotFirst	94.6933	0.798729	0.818392	0.975974	0.329077	0.430963
																s__Mycobacterium phage Iracema64	23.8834	1.45485	0.822279	1.76929	0.0768449	0.126458
																s__Mycobacterium phage Jobu08	1.17886	-2.95949	1.07503	-2.75293	0.00590647	0.0134527
																s__Mycobacterium phage LadyBird	0.877845	-0.793609	1.02391	-0.775079	0.438293	0.540726
																s__Mycobacterium phage Larenn	0.0317381	0.530466	1.8816	0.281923	0.778002	NA
																s__Mycobacterium phage Loser	7.24656	0.969953	1.14196	0.849374	0.395673	0.499731
																s__Mycobacterium phage Luchador	0.105887	-0.287891	1.88157	-0.153005	0.878394	NA
																s__Mycobacterium phage Makemake	15.674	1.31393	0.73008	1.79971	0.0719068	0.119179
																s__Mycobacterium phage Mulciber	46.4915	0.184576	0.351227	0.525518	0.599223	0.68657
																s__Mycobacterium phage Nerujay	7.26576	1.90597	0.75302	2.5311	0.0113706	0.0239324
																s__Mycobacterium phage Phantastic	0.0227731	0.455944	1.8816	0.242318	0.808534	NA
																s__Mycobacterium phage Phlei	115.205	-1.31839	0.388507	-3.39348	0.000690118	0.00204799
																s__Mycobacterium phage Pioneer	10.0968	-1.11002	0.915412	-1.21259	0.225288	0.315424
																s__Mycobacterium phage RhynO	826.373	1.4794	0.331873	4.45773	8.2834e-06	4.01724e-05
																s__Mycobacterium phage SarFire	125.107	2.75828	0.704804	3.91355	9.09509e-05	0.000345719
																s__Mycobacterium phage Serenity	982.159	-2.09106	0.629598	-3.32126	0.000896123	0.00256463
																s__Mycobacterium phage Severus	61.8348	2.70052	0.675926	3.99529	6.46143e-05	0.000255987
																s__Mycobacterium phage Sheen	18.8232	1.61642	0.611304	2.64421	0.00818807	0.0179436
																s__Mycobacterium phage Smeadley	1330.33	1.58284	0.530509	2.98362	0.00284861	0.0070999
																s__Mycobacterium phage SweetiePie	733.066	0.21792	0.439253	0.496115	0.619813	0.703813
																s__Mycobacterium phage Swirley	5.39121	3.87164	1.26345	3.06435	0.00218143	0.00561696
																s__Mycobacterium phage Theia	192.455	0.89537	0.728798	1.22856	0.219238	0.308783
																s__Mycobacterium phage Tiffany	1.58029	2.46225	1.1738	2.09768	0.0359332	0.0650195
																s__Mycobacterium phage Trike	64.8617	2.54865	0.339414	7.50897	5.95937e-14	1.26172e-12
																s__Mycobacterium phage UnionJack	113.21	-0.323418	0.661082	-0.489225	0.624682	0.707709
																s__Mycobacterium phage VohminGhazi	173.969	-0.66301	0.381583	-1.73753	0.0822943	0.134137
																s__Mycobacterium phage Wile	32.9214	-0.396059	0.35777	-1.10702	0.268285	0.364563
																s__Mycobacterium virus Alma	1674.46	-0.53003	0.473418	-1.11958	0.262893	0.358225
																s__Mycobacterium virus Bxz2	433.833	-3.83933	0.436613	-8.79344	1.45044e-18	6.64168e-17
																s__Mycobacterium virus Che12	665.7	-0.154182	0.313891	-0.491197	0.623287	0.706332
																s__Mycobacterium virus D29	300.517	-0.923546	0.521844	-1.76978	0.0767645	0.126379
																s__Mycobacterium virus Doom	13.642	-6.09736	1.04346	-5.84342	5.11407e-09	4.92401e-08
																s__Mycobacterium virus Kugel	54.6736	2.3691	0.383303	6.18076	6.37941e-10	7.0996e-09
																s__Mycobacterium virus L5	190.676	-1.64184	0.391437	-4.19439	2.73602e-05	0.000118792
																s__Mycobacterium virus Peaches	494.171	-2.05311	0.303019	-6.77549	1.23982e-11	1.8355e-10
																s__Mycobacterium virus Pukovnik	0	0	0	0	1	NA
																s__Mycobacterium virus Redrock	162.27	1.02424	0.216228	4.73687	2.17049e-06	1.19711e-05
																s__Mycobacterium virus Trixie	163.521	-0.843951	0.531092	-1.58909	0.112041	0.174463
																s__Mycobacterium virus Turbido	6.68997	2.58743	1.04764	2.46977	0.0135198	0.0277797
																s__Mycobacterium virus Gaia	1483.39	0.747596	0.321298	2.3268	0.019976	0.0390787
																s__Gordonia virus GAL1	76.7119	-2.0079	0.589223	-3.40771	0.000655099	0.00195734
																s__Gordonia virus GMA3	7105.98	1.37867	0.381996	3.60913	0.000307225	0.00100403
																s__Gordonia virus Gsput1	100.958	-0.44166	0.36425	-1.21252	0.225314	0.315424
																s__Gordonia virus GMA7	7.47452	1.22355	0.67052	1.82478	0.0680339	0.113621
																s__Gordonia virus GTE7	322.217	2.12586	0.594623	3.57514	0.000350042	0.00112567
																s__Gordonia virus Ghobes	955.492	-0.543273	0.361128	-1.50438	0.132484	0.201282
																s__Mycobacterium virus Giles	2952.32	-1.40851	0.401029	-3.51224	0.000444344	0.00138545
																s__Gordonia phage Gmala1	145.442	1.70361	0.583992	2.91719	0.00353204	0.00858061
																s__Gordonia virus GordTnk2	6.84614	-2.56662	0.564641	-4.54558	5.47835e-06	2.75527e-05
																s__Gordonia virus Jumbo	2555	2.31568	0.649639	3.56456	0.00036446	0.00116687
																s__Shigella virus pSf1	4.82011	2.74744	1.08786	2.52553	0.0115524	0.0242243
																s__Paenibacillus virus Harrison	26.7449	-1.07537	0.519896	-2.06844	0.038599	0.069218
																s__Mycobacterium virus Hawkeye	81.1898	0.256499	0.33539	0.764777	0.444404	0.545872
																s__Gordonia virus Hedwig	236.012	-0.86625	0.620814	-1.39534	0.162912	0.239652
																s__Cellulophaga virus Cba121	453.966	-0.854601	0.48882	-1.74829	0.0804133	0.131288
																s__Cellulophaga virus Cba171	8.37027	-2.68416	1.00801	-2.66284	0.00774842	0.0170656
																s__Cellulophaga virus Cba181	33.8691	0.759341	0.371686	2.04296	0.041056	0.0729597
																s__Enterobacteria phage HK140	204.112	-3.08264	0.582204	-5.29478	1.19162e-07	8.51653e-07
																s__Enterobacteria phage mEp235	71.6387	-0.930786	0.623341	-1.49322	0.135379	0.205205
																s__Escherichia virus HK022	2910.28	-1.22368	0.561712	-2.17848	0.0293706	0.0549461
																s__Escherichia virus HK106	137.454	-2.26977	0.656549	-3.45712	0.000545983	0.0016603
																s__Escherichia virus HK446	33.8594	-2.68846	0.737097	-3.64736	0.000264951	0.000879003
																s__Escherichia virus HK542	71.219	-2.14354	0.652451	-3.28536	0.00101851	0.00287931
																s__Escherichia virus HK544	130.701	-3.73333	0.576198	-6.47925	9.21824e-11	1.21817e-09
																s__Escherichia virus HK633	6.01071	1.25264	0.894089	1.40102	0.161208	0.237411
																s__Escherichia virus HK75	12.6252	-0.528297	0.77348	-0.683013	0.494599	0.591296
																s__Escherichia virus HK97	244.266	-3.58362	0.579401	-6.18505	6.20824e-10	6.94547e-09
																s__Escherichia virus mEp234	170.843	0.859359	0.47837	1.79643	0.0724258	0.119938
																s__Escherichia virus mEpX1	21.667	-0.765835	0.662603	-1.1558	0.247764	0.34163
																s__Escherichia virus mEpX2	24.0233	-3.13144	0.976543	-3.20666	0.00134287	0.00367492
																s__Listeria virus LP26	57.6167	-2.78539	0.728851	-3.82161	0.000132583	0.000479442
																s__Listeria virus P70	1228.6	-0.565762	1.0134	-0.558283	0.576651	0.667282
																s__Polaribacter virus P12002L	1.46856	-3.32545	0.936815	-3.54974	0.000385606	0.0012256
																s__Polaribacter virus P12002S	2.35286	-0.481322	0.891808	-0.539714	0.589394	0.67813
																s__Nonlabens virus P12024L	55.5522	-0.496995	0.46537	-1.06796	0.28554	0.384035
																s__Brevibacillus virus Jenst	1617.68	-1.21894	0.270685	-4.50317	6.69462e-06	3.31555e-05
																s__Salmonella phage BPS11Q3	144.743	3.61692	0.77607	4.66056	3.1535e-06	1.6703e-05
																s__Salmonella virus Jersey	1635.24	0.365912	0.451315	0.810768	0.417499	0.520948
																s__Salmonella virus LSPA1	43.5616	6.22687	1.18722	5.24493	1.56339e-07	1.08775e-06
																s__Salmonella virus SE2	1211.94	-0.263554	0.602933	-0.437119	0.662025	0.739436
																s__Salmonella virus SETP3	149.104	-3.37198	0.413303	-8.15861	3.38891e-16	1.0939e-14
																s__Salmonella virus f18SE	0	0	0	0	1	NA
																s__Vibrio virus phi3	1101.71	1.02515	0.340247	3.01296	0.00258714	0.00652669
																s__Escherichia virus K1G	16321.8	3.36996	0.656981	5.12946	2.90571e-07	1.93944e-06
																s__Escherichia virus K1H	320.933	1.83486	0.363354	5.04978	4.42322e-07	2.82312e-06
																s__Arthrobacter virus Kellezzio	255.76	-1.0197	0.255159	-3.99632	6.43336e-05	0.000255132
																s__Arthrobacter virus Kitkat	42.9747	3.26899	0.666633	4.90373	9.40317e-07	5.66203e-06
																s__Xanthomonas virus CP1	412.351	0.790622	0.559598	1.41284	0.157703	0.233472
																s__Mycobacterium phage Phrux	7.54553	2.12668	0.554964	3.83211	0.000127048	0.000463685
																s__Mycobacterium virus Toto	64.3018	2.69775	0.765591	3.52376	0.000425476	0.00133508
																s__Escherichia virus HK629	997.749	1.08413	0.530592	2.04325	0.0410275	0.0729419
																s__Escherichia virus Lambda	470.922	1.10107	0.54863	2.00694	0.0447565	0.0785084
																s__Mycobacterium phage Cambiare	30.9366	1.71883	0.621617	2.76509	0.00569071	0.0130275
																s__Mycobacterium phage FlagStaff	18.2189	-1.31255	0.548761	-2.39184	0.0167642	0.0336309
																s__Mycobacterium phage Jolie2	211.571	1.28532	0.397467	3.23378	0.00122165	0.00338793
																s__Mycobacterium phage MOOREtheMARYer	11.6673	0.714629	0.491905	1.45278	0.146285	0.218955
																s__Mycobacterium phage Sneeze	66.5678	-1.84646	0.383225	-4.8182	1.44857e-06	8.30346e-06
																s__Mycobacterium virus Liefie	60.1545	-1.0263	0.432272	-2.37419	0.0175875	0.0351215
																s__Streptomyces phage Nanodon	714.444	-0.524311	0.360758	-1.45336	0.146124	0.218797
																s__Streptomyces virus Caliburn	0.338511	0.905702	1.88159	0.481349	0.630268	0.712399
																s__Streptomyces virus Izzy	4.14862	0.198245	1.13227	0.175086	0.861012	0.900278
																s__Streptomyces virus Lannister	61.6867	0.360667	0.434637	0.829812	0.406645	0.50999
																s__Streptomyces virus Lika	890.834	0.34499	0.458947	0.751699	0.452232	0.553587
																s__Streptomyces virus Zemlya	3492.01	2.77105	0.587025	4.72049	2.35279e-06	1.27812e-05
																s__Paenibacillus virus Lily	0.449337	-1.23272	1.73194	-0.711754	0.476617	0.575036
																s__Leuconostoc virus LN03	0.743585	1.67414	1.88108	0.889991	0.373471	0.477575
																s__Leuconostoc virus LN04	870.688	-2.54691	0.901885	-2.82398	0.00474315	0.0111116
																s__Leuconostoc virus LN12	0.0916193	0.64225	1.8816	0.341332	0.732853	NA
																s__Leuconostoc virus P793	0.948465	-0.209914	1.80704	-0.116165	0.907522	0.933844
																s__Streptomyces phage phiSASD1	76.6783	1.30785	0.677285	1.93101	0.0534816	0.0918493
																s__Streptomyces virus TG1	18.6724	-0.320837	0.680564	-0.471427	0.637336	0.71812
																s__Streptomyces virus phiBT1	1064.33	-0.276846	0.468052	-0.591486	0.554195	0.646069
																s__Streptomyces virus phiC31	14.4359	1.5322	0.692363	2.213	0.0268977	0.0511212
																s__Bacillus virus BMBtp2	1928.31	-0.854113	0.410506	-2.08064	0.0374673	0.0674651
																s__Bacillus virus TP21	79.7587	-3.5752	0.555496	-6.43606	1.22616e-10	1.57355e-09
																s__Mycobacterium virus Ff47	748.401	2.15905	0.473342	4.5613	5.08379e-06	2.58322e-05
																s__Vibrio virus MAR10	1426.19	2.03596	0.347358	5.86126	4.59363e-09	4.44464e-08
																s__Mycobacterium virus Mosmoris	104.639	1.06073	0.355808	2.98119	0.00287127	0.00715183
																s__Microbacterium virus Min1	54.5716	1.20991	0.381729	3.16955	0.00152676	0.00410401
																s__Streptococcus phage YMC-2011	101.367	-4.45013	0.59791	-7.44281	9.85664e-14	2.03222e-12
																s__Streptococcus virus 7201	137.883	-3.49607	0.621269	-5.6273	1.83047e-08	1.56364e-07
																s__Streptococcus virus DT1	16.6994	-6.34169	0.814561	-7.78541	6.94882e-15	1.68916e-13
																s__Streptococcus virus Sfi19	0.14446	-0.395043	1.88152	-0.20996	0.833699	NA
																s__Streptococcus virus Sfi21	36.5485	-4.53614	0.758155	-5.98313	2.18893e-09	2.25655e-08
																s__Streptococcus virus phiAbc2	327.701	1.23524	0.336237	3.67372	0.000239043	0.000801833
																s__Arthrobacter virus Mudcat	305.532	-0.955287	0.301716	-3.16618	0.00154458	0.00414907
																s__Pectobacterium virus My1	1313.1	0.166919	0.54836	0.304396	0.760826	0.820269
																s__Rhizobium phage RHEph10	702.676	-1.99634	0.403707	-4.94504	7.61285e-07	4.67698e-06
																s__Salmonella phage SSU5	3024.08	-1.07351	0.302014	-3.5545	0.000378703	0.00120561
																s__Pseudomonas virus NP1	153.136	-2.756	1.08243	-2.54612	0.0108929	0.0230501
																s__Escherichia virus 9g	181.516	-1.83511	0.401516	-4.57046	4.86653e-06	2.48244e-05
																s__Escherichia virus JenK1	304.681	-0.488381	0.328908	-1.48486	0.137582	0.208223
																s__Escherichia virus JenP1	38.801	-2.98029	0.65096	-4.5783	4.68776e-06	2.39745e-05
																s__Escherichia virus JenP2	167.131	-2.25818	0.394905	-5.7183	1.07595e-08	9.71809e-08
																s__Salmonella virus 9NA	117.077	-3.35959	0.586352	-5.72964	1.00643e-08	9.11109e-08
																s__Gordonia virus Nyceirae	259.839	-0.803131	0.344365	-2.33221	0.0196897	0.0386145
																s__Gordonia virus Kita	84.422	2.55654	0.866866	2.94918	0.00318619	0.00781272
																s__Gordonia virus Nymphadora	4.79414	-1.16791	0.529061	-2.20751	0.0272784	0.0517199
																s__Gordonia virus Zirinka	214.385	1.96492	0.439154	4.47433	7.66527e-06	3.74979e-05
																s__Mycobacterium phage Minerva	41.4972	0.249562	0.551235	0.452733	0.650741	0.730268
																s__Mycobacterium phage Redno2	66.4104	2.92219	0.296451	9.85726	6.37658e-23	5.34276e-21
																s__Mycobacterium virus Omega	68.1792	-3.21469	0.443734	-7.24464	4.33603e-13	8.17e-12
																s__Mycobacterium virus Thibault	3.29241	-3.57976	0.743515	-4.81464	1.47466e-06	8.42696e-06
																s__Gordonia virus Orchid	229.614	0.312027	0.450025	0.693354	0.488087	0.585288
																s__Thermus virus P23-45	279.355	1.10171	0.309226	3.56279	0.000366929	0.00117381
																s__Thermus virus P74-26	20.3196	2.19085	0.40235	5.44513	5.17688e-08	4.053e-07
																s__Propionibacterium phage BruceLethal	14.3252	-2.56579	0.673526	-3.80949	0.000139253	0.000498075
																s__Propionibacterium phage Moyashi	0.104481	-0.218777	1.88159	-0.116273	0.907436	NA
																s__Propionibacterium phage PA1-14	1.53666	0.253983	1.87812	0.135232	0.892428	0.923137
																s__Propionibacterium phage PAC1	0.229114	0.679511	1.8816	0.361135	0.717998	0.786728
																s__Propionibacterium phage PHL010M04	37.5523	-2.85007	0.411939	-6.91866	4.55923e-12	7.29848e-11
																s__Propionibacterium phage PHL030N00	536.314	-1.90603	0.537227	-3.54791	0.000388301	0.00123317
																s__Propionibacterium phage PHL067M10	5.71651	0.462477	0.500366	0.924277	0.355342	0.458124
																s__Propionibacterium phage PHL085N00	167.5	0.113946	0.376258	0.302839	0.762012	0.821238
																s__Propionibacterium phage PHL150M00	70.4087	0.684995	0.980992	0.698268	0.48501	0.582485
																s__Propionibacterium virus Kubed	76.2917	-1.21519	0.561886	-2.16269	0.0305649	0.0568563
																s__Propionibacterium virus Lauchelly	0.22361	1.16595	1.74183	0.66938	0.503253	0.599459
																s__Propionibacterium virus P1001	11.943	2.61636	1.22901	2.12883	0.0332687	0.0608509
																s__Propionibacterium virus P100A	0.608261	-0.0690185	1.88009	-0.0367101	0.970716	0.978919
																s__Propionibacterium virus P105	139.753	-0.981329	0.32536	-3.01613	0.0025602	0.006467
																s__Propionibacterium virus PAD20	12.0933	-0.0409149	1.49941	-0.0272873	0.978231	0.982973
																s__Propionibacterium virus PHL092M00	2.09547	1.96984	1.71548	1.14827	0.250856	0.344446
																s__Propionibacterium virus PHL113M01	1853.59	1.25007	0.566686	2.20594	0.0273885	0.0518667
																s__Propionibacterium virus PHL171M01	1.46318	-0.0386323	1.8782	-0.0205688	0.98359	0.986818
																s__Propionibacterium virus PHL199M00	5.03718	-0.758552	1.14052	-0.665093	0.505991	0.60181
																s__Propionibacterium virus Pacnes201215	13.0581	2.31083	0.578879	3.99191	6.55421e-05	0.000259142
																s__Propionibacterium virus Pirate	28.9025	7.33241	1.36678	5.36474	8.1067e-08	5.97831e-07
																s__Pseudomonas virus PaMx28	1431.6	-0.135327	0.309764	-0.436871	0.662205	0.739436
																s__Pseudomonas virus PaMx74	3969.31	1.23992	0.34566	3.58712	0.000334354	0.00108102
																s__Mycobacterium virus Papyrus	22.1646	0.0270999	0.270146	0.100316	0.920094	0.94088
																s__Mycobacterium virus Patience	52.5117	0.430911	0.532244	0.809611	0.418164	0.521411
																s__Mycobacterium virus Oline	11.2518	-2.87963	0.51991	-5.53872	3.04691e-08	2.47908e-07
																s__Mycobacterium virus Suffolk	625.515	1.00788	0.325906	3.09254	0.00198453	0.00518585
																s__Rhodococcus virus Pepy6	255.643	-0.803052	0.300455	-2.67279	0.00752232	0.0166702
																s__Rhodococcus virus Poco6	398.398	-0.347776	0.245409	-1.41713	0.156445	0.231959
																s__Mycobacterium virus Phayonce	398.825	-2.21232	0.641891	-3.44656	0.000567763	0.00171989
																s__Caulobacter virus Karma	16.79	-0.777235	0.410822	-1.8919	0.0585042	0.0994284
																s__Caulobacter virus Magneto	10.9127	0.800796	0.947875	0.844832	0.398204	0.502123
																s__Caulobacter virus Rogue	6059.94	-0.806231	0.406504	-1.98333	0.0473305	0.0826186
																s__Caulobacter virus Swift	0	0	0	0	1	NA
																s__Caulobacter virus phiCbK	579.199	1.13825	0.295372	3.85362	0.000116382	0.000430341
																s__Staphylococcus phage 3MRA	3.58773	4.30288	1.5116	2.84658	0.00441922	0.0104626
																s__Staphylococcus phage B236	123.998	2.44268	0.958027	2.54969	0.0107817	0.0228887
																s__Staphylococcus phage DW2	0.184686	0.0833322	1.8816	0.044288	0.964675	NA
																s__Staphylococcus phage StB12	2249.24	0.448043	0.255118	1.75622	0.0790512	0.129494
																s__Staphylococcus phage StB27	330.598	1.73819	0.650533	2.67195	0.00754128	0.0166934
																s__Staphylococcus phage TEM123	4.57225	0.773902	1.87687	0.412337	0.680092	0.754849
																s__Staphylococcus virus 187	1.05158	-0.596631	0.772404	-0.772434	0.439857	0.542421
																s__Staphylococcus virus 37	72.2678	1.91998	0.344733	5.56948	2.55504e-08	2.11381e-07
																s__Staphylococcus virus 55	1529.27	-0.569658	0.452743	-1.25824	0.208306	0.296248
																s__Staphylococcus virus CNPH82	193.25	1.06955	0.87725	1.21921	0.222764	0.312743
																s__Staphylococcus virus EW	265.287	2.33725	0.637441	3.66662	0.000245781	0.000821634
																s__Staphylococcus virus IPLA5	109.813	2.16704	0.319536	6.78184	1.18656e-11	1.76995e-10
																s__Staphylococcus virus IPLA7	0.0047774	0.34416	1.8816	0.182909	0.85487	NA
																s__Staphylococcus virus IPLA88	14.0508	1.0057	0.885753	1.13542	0.2562	0.350439
																s__Staphylococcus virus PH15	1.78149	0.852509	1.73005	0.492766	0.622178	0.705755
																s__Staphylococcus virus phiMR11	6.22699	4.35477	0.520712	8.36311	6.1085e-17	2.22734e-15
																s__Staphylococcus virus phiMR25	4.25397	-1.10249	0.533566	-2.06627	0.038803	0.069489
																s__Staphylococcus virus phiNM1	1.8145	0.758145	1.28587	0.589597	0.555461	0.64697
																s__Enterococcus virus FL1	3.24303	-3.71679	1.45844	-2.54848	0.0108194	0.0229315
																s__Enterococcus virus FL2	9.54807	-1.3312	1.47068	-0.905158	0.365382	0.468841
																s__Enterococcus virus FL3	65.0423	-1.47042	0.357007	-4.11875	3.80939e-05	0.00015942
																s__Mycobacterium virus Gadjet	10663.2	0.38149	0.375172	1.01684	0.30923	0.410155
																s__Mycobacterium virus Plot	7.65763	-3.50255	1.34597	-2.60226	0.00926125	0.0199731
																s__Listeria phage B025	16.7802	-2.89292	0.586215	-4.93491	8.01873e-07	4.90338e-06
																s__Listeria phage LP-101	297.274	-0.488747	0.600257	-0.81423	0.415513	0.519458
																s__Listeria virus LP302	1.75886	-1.60308	1.26055	-1.27173	0.203468	0.289996
																s__Listeria virus PSA	493.211	1.94101	0.880351	2.20481	0.0274676	0.0519536
																s__Propionibacterium phage PFR2	1.21991	3.57956	1.18823	3.01252	0.00259086	0.00653188
																s__Escherichia virus N15	114.408	1.7313	0.480758	3.60118	0.000316776	0.00103181
																s__Mycobacterium virus Panchino	46.8384	-3.89854	0.569071	-6.85072	7.34812e-12	1.13378e-10
																s__Mycobacterium virus Phrann	0.106932	0.64225	1.8816	0.341332	0.732853	NA
																s__Mycobacterium virus Redi	160.239	2.61307	0.473106	5.52323	3.32816e-08	2.68023e-07
																s__Rhizobium virus P106B	383.009	-0.220898	0.237666	-0.929446	0.352658	0.455932
																s__Escherichia virus E41c	1436.66	1.64761	0.46622	3.53398	0.000409348	0.00129071
																s__Escherichia virus Eb49	876.375	0.566597	0.273455	2.072	0.0382658	0.0686831
																s__Escherichia virus Rogue1	18.1663	-3.02986	0.819621	-3.69667	0.000218449	0.000741596
																s__Mycobacterium virus Rosebush	714.663	-1.03127	0.731014	-1.41074	0.15832	0.233946
																s__Salmonella phage 64795_sal3	454.382	0.263868	0.512627	0.514737	0.606737	0.693363
																s__Salmonella phage IME207	601.633	0.155666	0.244662	0.636251	0.524613	0.619282
																s__Salmonella phage Vi II-E1	4.72426	-2.79436	1.0904	-2.56269	0.0103864	0.0220971
																s__Vibrio phage pYD38-A	891.302	-1.51549	0.407164	-3.72208	0.000197592	0.000679578
																s__Escherichia virus ACGM12	4.13192	0.830375	1.05523	0.786911	0.431334	0.533944
																s__Escherichia virus Rtp	166.086	-3.65031	0.454356	-8.03402	9.43313e-16	2.6725e-14
																s__Streptomyces virus Jay2Jay	1011.4	-0.344743	0.218061	-1.58095	0.113889	0.176712
																s__Enterococcus phage vB_EfaS_IME198	27.3689	0.284451	0.482974	0.588958	0.555889	0.64719
																s__Enterococcus virus BC611	8.6138	-0.255177	0.722268	-0.3533	0.723864	0.790848
																s__Streptococcus virus SPQS1	235.767	3.03793	0.955691	3.17877	0.001479	0.00399472
																s__Corynebacterium virus BFK20	21.0956	1.1494	0.590164	1.94759	0.0514642	0.0888399
																s__Burkholderia virus KL1	983.136	-0.377236	0.271574	-1.38907	0.164811	0.241813
																s__Pseudomonas phage PaMx42	5384.07	4.06705	0.505686	8.04265	8.79196e-16	2.52721e-14
																s__Pseudomonas virus Ab26	13.9726	-0.403767	0.49542	-0.814998	0.415073	0.519345
																s__Pseudomonas virus Kakheti25	0.7836	-1.05162	1.87982	-0.559426	0.575871	0.666798
																s__Stenotrophomonas phage vB_SmaS-DLP_2	800.023	3.73658	0.768416	4.8627	1.15797e-06	6.78587e-06
																s__Escherichia virus Cajan	504.346	0.618071	0.370725	1.6672	0.0954756	0.15222
																s__Escherichia virus Seurat	191.265	1.63996	0.780291	2.10173	0.035577	0.0645931
																s__Staphylococcus virus SEP9	39.3181	2.04907	0.327906	6.24895	4.13219e-10	4.84302e-09
																s__Staphylococcus virus Sextaec	110.924	-0.652992	0.421597	-1.54886	0.121416	0.1867
																s__Paenibacillus phage Xenia	1544.36	2.44902	0.456314	5.36696	8.00737e-08	5.91614e-07
																s__Paenibacillus phage phiIBB_Pl23	14.1444	1.71386	0.479425	3.57483	0.00035045	0.00112567
																s__Lactococcus phage jm2	71.7531	2.41184	0.624688	3.86087	0.000112982	0.000419342
																s__Lactococcus phage jm3	8.03533	1.89503	1.16214	1.63064	0.102967	0.162258
																s__Lactococcus phage phi7	1.03044	0.637645	1.87896	0.33936	0.734339	0.79951
																s__Lactococcus virus 712	0.92819	-2.46047	0.965172	-2.54925	0.0107954	0.0229053
																s__Lactococcus virus ASCC191	2532.62	0.961292	0.321163	2.99316	0.00276105	0.00690351
																s__Lactococcus virus CB13	16.3919	-3.7178	0.826186	-4.49996	6.79668e-06	3.34985e-05
																s__Lactococcus virus P008	0.431404	-0.0552168	1.1911	-0.0463579	0.963025	0.973907
																s__Lactococcus virus jj50	243.768	-1.02219	0.635147	-1.60937	0.107536	0.168313
																s__Bacillus virus Slash	105.651	-2.04419	0.396942	-5.14985	2.607e-07	1.75794e-06
																s__Bacillus virus Stahl	58.5535	0.0628485	0.517511	0.121444	0.90334	0.930585
																s__Bacillus virus Staley	0.93059	1.2975	1.78697	0.726093	0.467782	0.566866
																s__Bacillus virus Stills	67.6589	0.999411	0.424016	2.35701	0.0184226	0.0365457
																s__Gordonia phage Cucurbita	22.7163	-0.29974	0.291611	-1.02788	0.304008	0.404181
																s__Gordonia virus Bachita	23.5278	-5.04314	0.76484	-6.59373	4.28925e-11	5.84465e-10
																s__Gordonia virus ClubL	31.309	0.849691	0.49804	1.70607	0.0879948	0.14231
																s__Gordonia virus OneUp	613.299	-1.73022	0.386955	-4.47138	7.77169e-06	3.79243e-05
																s__Gordonia phage Remus	322.602	1.83583	0.422458	4.3456	1.38898e-05	6.48082e-05
																s__Gordonia virus Soups	62.9613	-0.312815	0.285699	-1.09491	0.273556	0.370703
																s__Bacillus virus SPbeta	2333.16	1.61008	0.342096	4.70651	2.51989e-06	1.36309e-05
																s__Staphylococcus phage SPbeta-like	4021.92	-0.612309	0.286843	-2.13465	0.0327898	0.0601151
																s__Burkholderia phage Bcep176	232.55	0.0617667	0.226221	0.273037	0.784825	0.838891
																s__Burkholderia phage KS9	567.434	2.37337	0.351259	6.75675	1.4112e-11	2.05067e-10
																s__Burkholderia virus phi1026b	668.361	0.0883422	0.289517	0.305136	0.760263	0.820269
																s__Burkholderia virus phi6442	1292.22	1.02309	0.480035	2.13128	0.0330657	0.0605077
																s__Burkholderia virus phiE125	25.9738	2.08301	0.923058	2.25664	0.0240303	0.0461616
																s__Achromobacter virus 83-24	114.584	0.012216	0.394968	0.0309291	0.975326	0.98073
																s__Achromobacter virus JWX	1423.85	2.10754	0.331215	6.36307	1.9776e-10	2.44899e-09
																s__Escherichia virus AKFV33	2.90593	-1.55383	0.996777	-1.55885	0.119031	0.183462
																s__Escherichia virus DT57C	257.809	0.051684	0.452303	0.114269	0.909025	0.934847
																s__Escherichia virus EPS7	150.974	-0.330193	0.615359	-0.536586	0.591554	0.680332
																s__Escherichia virus FFH1	250.221	-1.99296	0.366034	-5.44474	5.18807e-08	4.05369e-07
																s__Escherichia virus T5	535.36	0.443498	0.357464	1.24068	0.214724	0.303418
																s__Escherichia virus slur09	173.551	2.32857	0.285516	8.15563	3.47354e-16	1.1121e-14
																s__Salmonella phage NR01	2.87705	0.400276	1.24284	0.322066	0.747403	0.810372
																s__Salmonella virus 118970sal2	18.2264	-2.03438	0.590422	-3.44563	0.000569721	0.00172449
																s__Salmonella virus SPC35	170.786	-0.949123	0.555272	-1.70929	0.0873966	0.141633
																s__Salmonella virus Stitch	3.31974	-0.350995	1.64444	-0.213443	0.830981	0.875911
																s__Yersinia phage phiR201	1707.84	1.81396	0.457697	3.96324	7.39393e-05	0.000286588
																s__Mycobacterium phage BarrelRoll	163.975	1.8071	0.719546	2.51145	0.0120237	0.0250658
																s__Mycobacterium phage Cheetobro	0.136449	0.64225	1.8816	0.341332	0.732853	NA
																s__Mycobacterium phage Enkosi	2.03692	-1.60096	1.09122	-1.46713	0.142341	0.214274
																s__Mycobacterium phage Keshu	112.29	1.8324	0.537275	3.41055	0.000648325	0.00194152
																s__Mycobacterium phage Kratio	6.62834	-2.82139	1.20955	-2.3326	0.0196694	0.0385939
																s__Mycobacterium phage Milly	150.755	2.42547	1.41118	1.71875	0.08566	0.139105
																s__Mycobacterium phage Mufasa	398.372	2.10676	0.519697	4.05383	5.03866e-05	0.000203929
																s__Mycobacterium phage Murucutumbu	140.978	2.24144	0.58203	3.85107	0.000117601	0.000434439
																s__Mycobacterium phage OkiRoe	18.6049	-1.53026	0.509028	-3.00625	0.00264495	0.00665123
																s__Mycobacterium phage Omnicron	180.771	-1.54219	0.417106	-3.69736	0.000217849	0.000740615
																s__Mycobacterium phage ShedlockHolmes	16.6655	2.82246	0.548807	5.14291	2.70517e-07	1.81173e-06
																s__Mycobacterium phage Validus	234.693	-2.43955	0.320046	-7.62252	2.4877e-14	5.69567e-13
																s__Mycobacterium phage ZoeJ	30.5363	-3.35353	0.559678	-5.99188	2.07428e-09	2.14961e-08
																s__Mycobacterium virus Angelica	236.606	3.58718	0.410488	8.73882	2.35563e-18	1.03072e-16
																s__Mycobacterium virus Crimd	0.445205	-0.988382	1.02616	-0.963189	0.335453	0.437856
																s__Mycobacterium virus Fionnbarth	159.59	-0.209983	0.516621	-0.406455	0.684408	0.758144
																s__Mycobacterium virus Larva	127.825	-1.31449	0.418846	-3.13837	0.00169892	0.00450831
																s__Mycobacterium virus TM4	105.084	2.25574	0.661855	3.4082	0.000653924	0.00195532
																s__Tsukamurella virus TIN2	695.962	0.223621	0.357756	0.625065	0.531928	0.626228
																s__Rhodobacter virus RcTitan	11.3473	-2.30065	0.917154	-2.50847	0.0121256	0.0252425
																s__Citrobacter virus Stevie	2.93742	0.429537	0.50514	0.850332	0.39514	0.499351
																s__Escherichia virus TLS	3.71606	1.06799	1.0778	0.990897	0.321736	0.422378
																s__Salmonella phage 36	31.3712	3.11234	1.00021	3.11169	0.00186019	0.00488687
																s__Salmonella phage phSE-2	28.2527	-0.504352	0.690409	-0.730512	0.465077	0.564921
																s__Staphylococcus phage StauST398-2	10.6548	2.21048	0.776	2.84856	0.00439171	0.0104121
																s__Staphylococcus phage YMC/09/04/R1988	0.712868	-1.76005	0.967859	-1.8185	0.0689873	0.114969
																s__Staphylococcus virus 42e	8.72607	-1.34948	0.644813	-2.09283	0.0363645	0.0656596
																s__Staphylococcus virus IPLA35	0.414391	-0.0563489	1.63971	-0.0343651	0.972586	0.979086
																s__Mycobacterium virus 32HC	659.189	2.15438	0.352422	6.11307	9.7733e-10	1.06318e-08
																s__Paenibacillus virus Tripp	24.8515	0.0303892	0.304903	0.0996683	0.920608	0.941161
																s__Escherichia virus ADB2	6.66298	-0.526446	0.520654	-1.01112	0.311957	0.412937
																s__Escherichia virus T1	0.930358	-1.26374	1.51713	-0.832981	0.404855	0.508231
																s__Shigella virus PSf2	0.173456	-0.433954	1.88139	-0.230656	0.817582	NA
																s__Shigella virus Shfl1	10.3254	-0.691892	0.584249	-1.18424	0.236317	0.328028
																s__Flavobacterium virus 2A	516.829	-2.03359	0.582466	-3.49134	0.000480597	0.00148206
																s__Leuconostoc virus 1A4	2.31688	-3.85513	0.893399	-4.31512	1.59513e-05	7.37279e-05
																s__Achromobacter phage JWF	2173.22	1.02719	0.406142	2.52915	0.0114339	0.0240015
																s__Achromobacter phage phiAxp-1	289.137	2.35713	0.384389	6.13215	8.67005e-10	9.51049e-09
																s__Achromobacter phage phiAxp-2	2.35986	0.329339	0.844623	0.389924	0.696593	0.768614
																s__Acinetobacter phage IME_AB3	426.406	-1.15001	0.285425	-4.02911	5.59882e-05	0.000225211
																s__Actinoplanes phage phiAsp2	364.041	1.84609	0.475096	3.88572	0.000102028	0.000384222
																s__Archaeal BJ1 virus	31.5739	-1.69993	0.462097	-3.67872	0.000234403	0.000786939
																s__Arthrobacter phage vB_ArS-ArV2	1153.86	3.01748	0.555073	5.43617	5.44367e-08	4.20168e-07
																s__Azospirillum phage Cd	183.526	-1.3646	0.529692	-2.57622	0.00998873	0.0213781
																s__Bacillus phage BCJA1c	30.4176	-2.94177	0.516768	-5.69263	1.25101e-08	1.11207e-07
																s__Bacillus phage BtCS33	0.0166708	0.269638	1.8816	0.143303	0.886051	NA
																s__Bacillus phage PBC1	316.834	-0.571175	0.383743	-1.48843	0.136637	0.207033
																s__Bacillus phage PM1	103.472	-0.653258	0.365187	-1.78883	0.0736423	0.121799
																s__Bacillus phage SPP1	92.764	0.356044	0.38764	0.918492	0.358361	0.461035
																s__Bacillus phage phIS3501	475.019	-0.922047	0.307422	-2.99929	0.00270608	0.00678762
																s__Bacillus phage phi105	111.111	1.20823	0.399127	3.02717	0.00246854	0.00627168
																s__Bacillus phage phi4B1	118.847	0.115081	0.322706	0.356612	0.721383	0.789112
																s__Bacillus phage phi4J1	53.2332	-4.89585	0.733892	-6.67108	2.53926e-11	3.55858e-10
																s__Bacillus phage phiCM3	59.5895	-0.838245	0.826233	-1.01454	0.310326	0.411192
																s__Bacillus phage vB_BanS-Tsamsa	1878.52	-1.13797	0.236722	-4.80721	1.53054e-06	8.6848e-06
																s__Bacillus phage vB_BhaS-171	28.2111	-1.90003	0.513641	-3.69915	0.000216326	0.000736931
																s__Bacillus phage vB_BtS_BMBtp3	68.2982	-1.35904	0.478571	-2.83979	0.00451436	0.0106516
																s__Bacteroides phage B124-14	567.592	-1.3356	0.317282	-4.20951	2.55922e-05	0.000111362
																s__Bacteroides phage B40-8	54.3263	1.08442	0.538408	2.01413	0.0439956	0.0774495
																s__Brevibacillus phage Sundance	4405.94	-1.27844	0.408369	-3.13059	0.00174458	0.00460776
																s__Brochothrix phage BL3	258.502	-1.70677	0.426568	-4.00117	6.30304e-05	0.000250527
																s__Brochothrix phage NF5	5.51192	-1.56133	1.24255	-1.25656	0.208913	0.297004
																s__Brucella phage BiPBO1	89.675	0.405167	0.326391	1.24136	0.214474	0.303318
																s__Burkholderia phage BcepGomr	0.0629388	0.567727	1.8816	0.301726	0.762861	NA
																s__Caulobacter phage CcrColossus	14613.1	0.607407	0.252644	2.4042	0.016208	0.032715
																s__Cellulophaga phage phi10:1	374.104	-1.17203	0.338777	-3.45959	0.000540994	0.00164767
																s__Cellulophaga phage phi19:1	118.498	-0.845044	0.27985	-3.01963	0.00253086	0.0064011
																s__Cellulophaga phage phi39:1	14.3811	1.34427	1.27041	1.05814	0.289992	0.388828
																s__Cellulophaga phage phi46:1	22.8681	-0.0921744	0.845945	-0.10896	0.913234	0.936541
																s__Clostridium phage PhiS63	14.3588	-2.45123	0.64237	-3.81592	0.000135675	0.000487489
																s__Clostridium phage phi3626	33.2971	-2.73832	0.62675	-4.36908	1.2477e-05	5.88437e-05
																s__Clostridium phage phi8074-B1	97.0869	2.05105	0.291404	7.03852	1.94294e-12	3.31225e-11
																s__Clostridium phage phiCD111	0.569912	-0.89685	1.46685	-0.611413	0.540926	0.634545
																s__Clostridium phage phiCD146	334.898	1.52049	0.337685	4.50267	6.71043e-06	3.31564e-05
																s__Clostridium phage phiCD211	8111.19	-1.04755	0.324226	-3.23092	0.00123392	0.00341715
																s__Clostridium phage phiCD6356	176.387	-0.632163	0.439678	-1.43779	0.150494	0.224402
																s__Clostridium phage phiCP26F	0.246469	0.395207	1.74382	0.226633	0.820709	0.867173
																s__Clostridium phage phiCP34O	129.24	0.785333	0.467762	1.67891	0.0931688	0.14945
																s__Clostridium phage phiCT453B	1814.08	1.05755	0.282755	3.74017	0.000183894	0.000639165
																s__Clostridium phage phiCTC2B	0	0	0	0	1	NA
																s__Clostridium phage phiCTP1	331.5	-4.01849	0.352509	-11.3997	4.19597e-30	1.37698e-27
																s__Clostridium phage phiSM101	2759.55	1.83287	0.336373	5.44893	5.0674e-08	3.97518e-07
																s__Clostridium phage vB_CpeS-CP51	80.0231	-0.978232	0.512414	-1.90907	0.0562536	0.0960653
																s__Colwellia phage 9A	327.6	-2.15219	0.396373	-5.42971	5.64455e-08	4.34145e-07
																s__Croceibacter phage P2559S	23.1211	-3.36507	0.927496	-3.62813	0.000285486	0.000940789
																s__Croceibacter phage P2559Y	57.2767	-0.0131541	0.6363	-0.0206728	0.983507	0.986818
																s__Cronobacter phage ENT39118	139.708	-1.16442	0.49525	-2.35118	0.0187139	0.0370143
																s__Cronobacter phage phiES15	118.312	1.39761	0.529615	2.63893	0.0083169	0.0181656
																s__Cronobacter virus Esp2949-1	36.183	-0.366004	0.575065	-0.636457	0.524479	0.619282
																s__Cyanophage PSS2	163.288	-2.12636	0.325892	-6.52474	6.81184e-11	9.03199e-10
																s__Enterobacteria phage BP-4795	3700.1	-2.44456	0.486404	-5.02578	5.01388e-07	3.17438e-06
																s__Enterobacteria phage ES18	177.174	0.440767	0.571081	0.771813	0.440225	0.542497
																s__Enterobacteria phage HK225	625.515	-2.08927	0.384169	-5.43843	5.37529e-08	4.16691e-07
																s__Enterobacteria phage YYZ-2008	4689.21	-2.25409	0.494563	-4.55774	5.17077e-06	2.62403e-05
																s__Enterobacteria phage cdtI	2653.49	-2.72002	0.514529	-5.28643	1.24728e-07	8.86561e-07
																s__Enterobacteria phage mEp043 c-1	15.5325	-3.89552	1.20916	-3.22167	0.00127445	0.00351209
																s__Enterobacteria phage mEp237	666.239	-0.742611	0.557245	-1.33265	0.182648	0.263855
																s__Enterobacteria phage mEp460	3875.83	-3.29894	0.532447	-6.19581	5.79875e-10	6.54312e-09
																s__Enterobacteria phage phi80	1689.35	-1.29627	0.5097	-2.54321	0.010984	0.0232054
																s__Enterobacterial phage mEp213	8.85278	-1.32385	0.8131	-1.62815	0.103493	0.162827
																s__Enterobacterial phage mEp390	517.1	-1.51524	0.437549	-3.46302	0.000534145	0.00163059
																s__Enterococcus phage EFC-1	520.216	-1.28725	0.355026	-3.62579	0.000288079	0.000948543
																s__Enterococcus phage phiEf11	166.403	0.29931	0.504803	0.592925	0.553231	0.645493
																s__Enterococcus phage phiFL4A	0.0616843	0.120593	1.8816	0.064091	0.948898	NA
																s__Enterococcus phage vB_EfaS_IME197	2.37532	-1.60473	0.95024	-1.68877	0.0912641	0.146873
																s__Erysipelothrix phage SE-1	1.66458	-3.23137	1.46514	-2.2055	0.0274188	0.0518861
																s__Escherichia phage HK639	1251.47	-0.76121	0.302107	-2.51968	0.0117463	0.0245395
																s__Flavobacterium phage 11b	102.982	-2.26316	0.436509	-5.18468	2.16387e-07	1.47173e-06
																s__Geobacillus phage GBK2	184.164	-1.57077	0.429916	-3.65367	0.000258516	0.000860553
																s__Geobacillus virus E2	36.2539	0.0178002	0.451452	0.0394289	0.968548	0.977781
																s__Geobacillus virus E3	560.216	1.18072	0.353418	3.34086	0.000835193	0.00240975
																s__Gordonia phage Blueberry	598.687	2.3317	0.301741	7.72749	1.09684e-14	2.55583e-13
																s__Gordonia phage CarolAnn	220.425	-0.668564	0.504625	-1.32487	0.185213	0.26707
																s__Gordonia phage GMA1	0.515938	0.18476	1.81973	0.101531	0.919129	0.940381
																s__Gordonia phage GMA4	416.554	1.33908	0.336614	3.97808	6.94748e-05	0.000272231
																s__Gordonia phage GMA5	159.722	1.70912	0.366536	4.6629	3.11781e-06	1.65694e-05
																s__Gordonia phage GRU1	370.063	-3.02115	0.30421	-9.93114	3.04737e-23	2.79083e-21
																s__Gordonia phage GRU3	1.56053	-0.292009	0.958916	-0.30452	0.760732	0.820269
																s__Gordonia phage GTE5	418.402	-0.916971	0.374717	-2.4471	0.0144011	0.02943
																s__Gordonia phage GTE6	1353.01	0.356447	0.313197	1.13809	0.255082	0.349153
																s__Gordonia phage GTE8	381.885	1.52653	0.218362	6.99083	2.73274e-12	4.50273e-11
																s__Gordonia phage Guacamole	422.531	2.00805	0.374052	5.36837	7.94535e-08	5.88135e-07
																s__Gordonia phage Lucky10	206.213	0.863976	0.361088	2.3927	0.0167248	0.0335689
																s__Gordonia phage McGonagall	0.0971327	0.530466	1.8816	0.281923	0.778002	NA
																s__Gordonia phage Obliviate	2.2776	4.34259	1.21056	3.58725	0.000334183	0.00108102
																s__Gordonia phage Phinally	168.56	-1.62159	0.356199	-4.55249	5.30137e-06	2.6757e-05
																s__Gordonia phage Terapin	159.107	-4.25879	0.429288	-9.92061	3.3869e-23	3.02423e-21
																s__Gordonia phage UmaThurman	90.0283	-3.03961	0.816154	-3.72431	0.000195847	0.000675305
																s__Gordonia phage Utz	46.7862	1.11944	0.666124	1.68053	0.0928543	0.149168
																s__Idiomarinaceae phage 1N2-2	4.10326	-4.35692	0.626462	-6.9548	3.53054e-12	5.74515e-11
																s__Idiomarinaceae phage Phi1M2-2	160.033	0.771355	0.447794	1.72257	0.0849671	0.13815
																s__Klebsiella phage phiKO2	191.242	-1.02337	0.644489	-1.58788	0.112313	0.174749
																s__Lactobacillus phage A2	91.7462	-0.914936	0.414126	-2.20932	0.0271526	0.0515311
																s__Lactobacillus phage CL1	21.7004	3.95981	1.04112	3.80341	0.000142717	0.000508157
																s__Lactobacillus phage CL2	0.56334	-1.51478	1.88023	-0.805638	0.420452	0.523306
																s__Lactobacillus phage J-1	0.0359203	0.306899	1.8816	0.163106	0.870435	NA
																s__Lactobacillus phage JCL1032	60.7056	1.84244	0.670751	2.74683	0.00601745	0.0136581
																s__Lactobacillus phage LF1	341.166	-1.98148	0.378814	-5.23075	1.68821e-07	1.16626e-06
																s__Lactobacillus phage LL-H	25.991	5.93428	1.10268	5.38169	7.37879e-08	5.53479e-07
																s__Lactobacillus phage Lc-Nu	934.03	-0.304521	0.419644	-0.725666	0.468044	0.56695
																s__Lactobacillus phage Ldl1	194.769	-0.63865	0.259988	-2.45646	0.0140314	0.0287192
																s__Lactobacillus phage Lrm1	21.1249	-2.32793	0.658795	-3.53361	0.000409922	0.00129142
																s__Lactobacillus phage Lv-1	5.13611	-0.411226	0.376327	-1.09274	0.27451	0.371484
																s__Lactobacillus phage PLE2	14.2213	-0.189273	0.536765	-0.352618	0.724375	0.790848
																s__Lactobacillus phage PLE3	22.5129	3.30584	1.1245	2.93983	0.00328388	0.00802228
																s__Lactobacillus phage Sha1	2237.52	0.26235	0.477896	0.548969	0.583027	0.672517
																s__Lactobacillus phage iA2	12.7908	-5.53222	0.634113	-8.72434	2.67737e-18	1.14603e-16
																s__Lactobacillus phage iLp1308	132.266	-1.78428	0.812231	-2.19677	0.0280371	0.0529037
																s__Lactobacillus phage iLp84	0.0719566	-0.0662005	1.8816	-0.0351832	0.971934	NA
																s__Lactobacillus phage phiJB	39.1936	-0.326722	0.811413	-0.402658	0.6872	0.76033
																s__Lactobacillus phage phiPYB5	52.7173	-1.46206	0.603222	-2.42375	0.0153614	0.0312142
																s__Lactobacillus phage phiadh	34.8802	-1.99982	0.760904	-2.62821	0.00858351	0.0186751
																s__Lactobacillus phage phig1e	81.1734	-0.722923	0.3934	-1.83763	0.0661168	0.110795
																s__Lactobacillus prophage Lj928	153.609	0.309307	0.547646	0.564793	0.572215	0.66348
																s__Lactobacillus prophage Lj965	2.17075	-2.97754	1.37618	-2.16363	0.0304924	0.0568018
																s__Lactococcus phage 1358	6.22825	0.175911	1.10492	0.159208	0.873505	0.910075
																s__Lactococcus phage 1706	76.0097	1.03032	0.359907	2.86275	0.00419983	0.0100236
																s__Lactococcus phage 50101	288.524	0.437783	0.419546	1.04347	0.296732	0.396112
																s__Lactococcus phage 63301	334.299	-4.09953	0.466763	-8.78288	1.59337e-18	7.13034e-17
																s__Lactococcus phage 949	373.074	-0.103046	0.200825	-0.513113	0.607872	0.694258
																s__Lactococcus phage 98201	3463.56	1.81231	0.551936	3.28355	0.00102507	0.00289578
																s__Lactococcus phage BK5-T	51.2555	0.183386	1.01079	0.181429	0.856031	0.897033
																s__Lactococcus phage BM13	263.346	-2.0684	0.620237	-3.33485	0.000853461	0.00245682
																s__Lactococcus phage P087	269.576	-2.13834	0.339429	-6.29982	2.97991e-10	3.61073e-09
																s__Lactococcus phage P092	15.0142	0.385537	0.340085	1.13365	0.256942	0.351333
																s__Lactococcus phage P118	7.89379	-1.5155	1.30371	-1.16245	0.245052	0.338899
																s__Lactococcus phage P162	280.328	0.96317	0.430215	2.23881	0.0251681	0.048066
																s__Lactococcus phage P335 sensu lato	171.779	-0.837565	0.670073	-1.24996	0.211314	0.29966
																s__Lactococcus phage PLgT-1	415.305	-2.28337	0.363722	-6.2778	3.43398e-10	4.0855e-09
																s__Lactococcus phage Q54	14.0271	1.71618	0.727606	2.35866	0.0183408	0.0364524
																s__Lactococcus phage TP901-1	27.4266	-0.282073	0.643271	-0.438498	0.661025	0.738682
																s__Lactococcus phage Tuc2009	629.79	-1.28766	0.425541	-3.02594	0.0024786	0.00629319
																s__Lactococcus phage WRP3	321.465	-0.358964	0.45074	-0.796386	0.425807	0.528468
																s__Lactococcus phage bIL285	5.74303	-5.12881	1.01368	-5.05958	4.2019e-07	2.69497e-06
																s__Lactococcus phage bIL286	334.347	-1.34165	0.560245	-2.39477	0.016631	0.0334318
																s__Lactococcus phage bIL309	2478	1.43466	0.242167	5.92424	3.13741e-09	3.11998e-08
																s__Lactococcus phage bIL310	181.219	-0.647243	0.544903	-1.18781	0.234907	0.326417
																s__Lactococcus phage bIL312	6421.18	-2.81122	0.503288	-5.58571	2.32743e-08	1.94182e-07
																s__Lactococcus phage phiL47	341.849	0.546535	0.300079	1.8213	0.0685612	0.11443
																s__Lactococcus phage r1t	317.896	1.6762	0.591253	2.835	0.00458257	0.0108061
																s__Lactococcus phage ul36	11.7417	0.500714	0.76608	0.653606	0.513366	0.608376
																s__Listeria phage A006	5.52315	0.466987	0.567837	0.822397	0.410851	0.514802
																s__Listeria phage A118	42.4997	-2.88543	0.945443	-3.05193	0.00227375	0.00581807
																s__Listeria phage B054	0	0	0	0	1	NA
																s__Listeria phage P35	34.3584	-5.23945	0.609565	-8.5954	8.29776e-18	3.36872e-16
																s__Listeria phage P40	11.9134	2.34274	1.22145	1.918	0.0551113	0.0941963
																s__Listeria phage vB_LmoS_188	80.629	-3.31401	0.458164	-7.23324	4.71599e-13	8.8017e-12
																s__Listeria phage vB_LmoS_293	2.96069	-0.959369	1.08633	-0.883128	0.377167	0.481141
																s__Listonella phage phiHSIC	0.0531878	0.455944	1.8816	0.242318	0.808534	NA
																s__Mannheimia phage vB_MhS_587AP2	93.6214	-0.332705	0.449141	-0.740757	0.458841	0.559589
																s__Marinomonas phage P12026	281.91	-1.20757	0.381932	-3.16174	0.00156829	0.00420417
																s__Methanobacterium phage psiM2	8.65582	-2.28511	0.742732	-3.07663	0.00209353	0.00543462
																s__Methanothermobacter phage psiM100	222.385	-0.507871	0.361581	-1.40458	0.160145	0.236074
																s__Microbacterium phage vB_MoxS-ISF9	200.455	-1.01142	0.462054	-2.18897	0.0285987	0.053783
																s__Mycobacterium phage 39HC	1.38523	3.14263	1.73564	1.81065	0.0701951	0.116587
																s__Mycobacterium phage Adler	1939.42	-1.88449	0.422359	-4.46182	8.12671e-06	3.96076e-05
																s__Mycobacterium phage Bipper	292.475	1.82591	0.315842	5.78109	7.42164e-09	6.89302e-08
																s__Mycobacterium phage DS6A	288.393	-1.42647	0.343381	-4.15419	3.26443e-05	0.000139278
																s__Mycobacterium phage Dori	106.938	0.881456	0.480825	1.83322	0.0667702	0.111795
																s__Mycobacterium phage Jolie1	33.7289	2.10582	0.547077	3.84922	0.000118496	0.000436928
																s__Mycobacterium phage KayaCho	365.695	0.648472	0.245603	2.64033	0.00828259	0.0181205
																s__Mycobacterium phage Sparky	74.6599	-0.829622	0.545283	-1.52145	0.128146	0.195673
																s__Nocardia phage NBR1	148.055	0.274668	0.34198	0.803169	0.421877	0.524251
																s__Paenibacillus phage PG1	346.092	2.98731	0.501648	5.955	2.6007e-09	2.64639e-08
																s__Paracoccus phage vB_PmaS-R3	1.90391	-1.88129	1.26901	-1.48249	0.13821	0.208933
																s__Pseudoalteromonas phage BS5	48.567	-5.11712	0.538953	-9.49457	2.21129e-21	1.55501e-19
																s__Pseudoalteromonas phage H103	771.34	-0.961804	0.340854	-2.82175	0.00477622	0.0111691
																s__Pseudoalteromonas phage H105/1	343.676	-2.5776	0.370488	-6.95731	3.46832e-12	5.66732e-11
																s__Pseudoalteromonas phage Pq0	709.712	-0.900711	0.312273	-2.88437	0.00392194	0.00942894
																s__Pseudomonas phage F10	91.6452	0.95091	0.376677	2.52447	0.0115873	0.0242717
																s__Pseudomonas phage JBD25	42.7325	1.68091	0.61858	2.71736	0.00658041	0.0148332
																s__Pseudomonas phage JBD44	7.64609	-0.190236	0.557981	-0.340936	0.733152	0.798839
																s__Pseudomonas phage PAJU2	10.7064	0.517434	1.72613	0.299766	0.764356	0.823088
																s__Pseudomonas phage PS-1	499.736	1.03108	0.430743	2.39373	0.016678	0.033492
																s__Pseudomonas phage YMC11/02/R656	374.772	1.53052	0.582778	2.62625	0.00863302	0.018762
																s__Pseudomonas phage YMC11/07/P54_PAE_BP	2907.73	-0.0992361	0.33419	-0.296945	0.766508	0.824235
																s__Pseudomonas phage phi2	200.62	-0.302245	0.495985	-0.609383	0.54227	0.635829
																s__Pseudomonas phage phi297	125.6	0.95465	0.46164	2.06795	0.0386443	0.0692677
																s__Pseudomonas phage phiPSA1	96.5235	2.7332	0.473455	5.77288	7.79269e-09	7.20367e-08
																s__Pseudomonas phage phiPto-bp6g	15.6577	-3.17793	0.319001	-9.96212	2.23246e-23	2.0932e-21
																s__Psychrobacter phage Psymv2	420.982	1.42562	0.415383	3.43205	0.000599044	0.00180769
																s__Ralstonia phage RS138	102.167	1.01361	0.374123	2.70929	0.00674272	0.0150954
																s__Rhizobium phage 16-3	709.063	-1.43521	0.339668	-4.22532	2.38596e-05	0.000104982
																s__Rhizobium phage vB_RleS_L338C	1019.47	-0.558482	0.334383	-1.67019	0.0948821	0.151663
																s__Rhodobacter phage RcapMu	87.5051	1.4673	0.430311	3.40987	0.000649943	0.00194489
																s__Rhodococcus phage REQ1	606.809	-1.11424	0.400343	-2.78321	0.00538241	0.012388
																s__Rhodococcus phage REQ2	347.212	1.0265	0.33168	3.09485	0.0019691	0.00515242
																s__Rhodococcus phage REQ3	7.50464	0.464035	0.885441	0.524072	0.600228	0.687322
																s__Rhodococcus phage ReqiDocB7	1070.83	2.43516	0.573058	4.24942	2.14324e-05	9.56924e-05
																s__Rhodococcus phage ReqiPine5	491.005	3.53257	0.47735	7.40039	1.35784e-13	2.74214e-12
																s__Rhodococcus virus RGL3	4.87385	-2.29316	1.5134	-1.51524	0.129712	0.197757
																s__Rhodovulum phage vB_RhkS_P1	0.419328	1.73836	1.881	0.924165	0.355401	0.458124
																s__Riemerella phage RAP44	273.614	-1.8077	0.335702	-5.38483	7.25149e-08	5.44969e-07
																s__Ruegeria phage DSS3-P1	80.3996	0.128431	0.6149	0.208864	0.834554	0.878971
																s__Salmonella phage SPN3UB	427.343	-1.84301	0.559352	-3.2949	0.000984584	0.00279143
																s__Salmonella phage vB_SosS_Oslo	536.443	-2.06135	0.456739	-4.51318	6.38636e-06	3.19156e-05
																s__Serratia phage Eta	5.22577	-2.10049	0.840018	-2.50053	0.0124008	0.025743
																s__Shewanella sp. phage 1/44	25.2963	-0.0575682	0.667238	-0.0862784	0.931245	0.949048
																s__Sinorhizobium phage phiLM21	598.742	1.18294	0.289213	4.09019	4.31029e-05	0.000177551
																s__Staphylococcus phage StB20	827.455	-0.296768	0.324988	-0.913168	0.361154	0.464021
																s__Staphylococcus phage StB20-like	363.98	1.42282	0.431146	3.30009	0.000966547	0.0027482
																s__Stenotrophomonas phage S1	10.6687	0.697122	0.580168	1.20159	0.229524	0.320292
																s__Streptococcus phage 5093	93.0582	-1.22221	0.317143	-3.85381	0.000116295	0.000430341
																s__Streptococcus phage A25	0.37552	-1.30123	1.73475	-0.750095	0.453197	0.554252
																s__Streptococcus phage APCM01	213.423	-2.89664	0.57004	-5.08148	3.74507e-07	2.42967e-06
																s__Streptococcus phage DCC1738	2.41034	-1.33166	1.25128	-1.06424	0.287221	0.386033
																s__Streptococcus phage Dp-1	674.078	0.469219	0.228311	2.05518	0.0398619	0.0711587
																s__Streptococcus phage IC1	6.91479	1.85239	0.879663	2.1058	0.0352217	0.0640366
																s__Streptococcus phage K13	163.567	3.3438	0.93537	3.57484	0.000350443	0.00112567
																s__Streptococcus phage M102	42.9878	-4.81108	1.01691	-4.73107	2.23342e-06	1.22326e-05
																s__Streptococcus phage P9	2.33595	-3.55483	1.09495	-3.24656	0.00116807	0.00325999
																s__Streptococcus phage PH10	63.2592	-1.42086	0.641286	-2.21565	0.0267158	0.0507999
																s__Streptococcus phage PH15	224.031	-4.74027	0.376248	-12.5988	2.14368e-36	8.44182e-33
																s__Streptococcus phage SM1	214.207	-0.35057	0.303497	-1.1551	0.248049	0.341764
																s__Streptococcus phage SMP	10.7866	-5.64185	0.658446	-8.56843	1.04909e-17	4.17304e-16
																s__Streptococcus phage SpSL1	364.54	-2.68522	0.384953	-6.97544	3.04923e-12	5.00328e-11
																s__Streptococcus phage T12	86.5203	-1.25193	0.537928	-2.32731	0.0199486	0.0390639
																s__Streptococcus phage phi3396	0.218545	-0.527561	1.65342	-0.319074	0.749671	0.812384
																s__Streptococcus phage phiARI0004	0.237862	0.229307	1.88158	0.121869	0.903003	0.930585
																s__Streptococcus phage phiARI0031	0.578917	-1.47867	1.88026	-0.786418	0.431623	0.534002
																s__Streptococcus phage phiARI0131-1	0.27574	-0.448108	1.62899	-0.275083	0.783253	0.83771
																s__Streptococcus phage phiARI0131-2	0.806011	-1.27232	1.64746	-0.772291	0.439942	0.542421
																s__Streptococcus phage phiARI0460-1	1.66194	0.0548251	0.813065	0.0674301	0.946239	0.962368
																s__Streptococcus phage phiARI0462	49.3971	-5.38319	0.602721	-8.93148	4.20338e-19	2.17801e-17
																s__Streptococcus phage phiARI0468-4	2.81897	-2.70201	0.855249	-3.15933	0.00158133	0.00422936
																s__Streptococcus phage phiARI0746	2.97289	-1.86746	0.670872	-2.78363	0.00537542	0.0123792
																s__Streptococcus phage phiARI0923	173.757	-2.88931	0.449893	-6.42222	1.34297e-10	1.71152e-09
																s__Streptococcus phage phiBHN167	0.694914	-1.98208	1.63467	-1.21253	0.225311	0.315424
																s__Streptococcus phage phiNJ2	10.1028	-4.74257	0.750167	-6.32202	2.58169e-10	3.16719e-09
																s__Streptococcus virus 9871	1.3433	-2.09843	1.27321	-1.64814	0.0993248	0.157591
																s__Streptococcus virus 9872	0.325295	-0.789576	1.88108	-0.419745	0.674671	0.750101
																s__Streptococcus virus 9874	105.982	-0.502714	0.460309	-1.09212	0.274779	0.371593
																s__Streptomyces phage SF1	30.1885	-0.342563	0.730035	-0.469241	0.638897	0.719467
																s__Streptomyces phage SF3	256.21	2.56417	0.944998	2.71341	0.0066594	0.0149514
																s__Streptomyces phage SV1	247.136	-1.14036	0.34692	-3.28711	0.00101221	0.00286355
																s__Streptomyces phage VWB	483.955	1.10391	0.413622	2.66888	0.0076104	0.0168275
																s__Streptomyces phage mu1/6	31.5287	1.92408	0.684783	2.80977	0.00495776	0.0115252
																s__Streptomyces virus phiHau3	2224.8	1.74439	0.458091	3.80796	0.000140117	0.000500254
																s__Stx2-converting phage 1717	3495.29	-1.13668	0.487054	-2.33378	0.0196073	0.0384912
																s__Synechococcus phage S-CBS1	62.6532	-2.88432	0.669691	-4.30693	1.65533e-05	7.60384e-05
																s__Synechococcus phage S-CBS2	2129.15	-1.11735	0.271273	-4.11894	3.80627e-05	0.00015942
																s__Synechococcus phage S-CBS3	10.7499	-1.20073	0.498356	-2.40937	0.0159799	0.0323128
																s__Synechococcus phage S-CBS4	49.9444	0.32133	0.459099	0.699914	0.483981	0.581427
																s__Synechococcus phage S-SKS1	3065.56	0.0843639	0.449291	0.187771	0.851056	0.893008
																s__Temperate phage phiNIH1.1	37.4449	-5.0415	0.570871	-8.83125	1.03509e-18	4.85259e-17
																s__Thermoanaerobacterium phage THSA-485A	50.6859	-1.268	0.437669	-2.89716	0.00376562	0.00908084
																s__Tsukamurella phage TPA2	942.776	3.06633	0.474188	6.46649	1.00304e-10	1.31217e-09
																s__Tsukamurella phage TPA4	157.587	-1.66755	0.387972	-4.29812	1.7225e-05	7.89664e-05
																s__Verrucomicrobia phage P8625	107.658	2.64575	0.377443	7.00968	2.38868e-12	4.03717e-11
																s__Vibrio phage SHOU24	6299.68	2.86709	0.586196	4.89101	1.0032e-06	5.96767e-06
																s__Vibrio phage SIO-2	328.235	0.637945	0.331294	1.92561	0.0541526	0.0928773
																s__Vibrio phage VpKK5	23.087	-2.37977	0.600879	-3.96048	7.47984e-05	0.000289348
																s__Vibrio phage pYD21-A	47.5077	-0.379882	0.362434	-1.04814	0.294573	0.393898
																s__Vibrio phage pYD38-B	0.706768	0.228125	1.80966	0.12606	0.899685	0.929179
																s__Weissella phage WCP30	0.0718705	0.306899	1.8816	0.163106	0.870435	NA
																s__Xanthomonas phage Xp15	122.193	0.0936059	0.966642	0.0968361	0.922857	0.942891
																s__Yersinia phage PY54	11.3484	-1.7748	1.08608	-1.63412	0.102233	0.161296
																s__Paenibacillus virus Vegas	37.965	-2.39262	0.485213	-4.93107	8.17801e-07	4.97759e-06
																s__Gordonia virus Vendetta	104.972	-0.467995	0.287248	-1.62924	0.103263	0.162594
																s__Acinetobacter phage Bphi-B1251	111.325	-1.81549	0.357345	-5.0805	3.76434e-07	2.43815e-06
																s__Acinetobacter phage vB_AbaS_TRS1	352.311	3.99273	0.660833	6.04195	1.52259e-09	1.6032e-08
																s__Gordonia virus Vivi2	2887.73	-0.0289241	0.33627	-0.0860147	0.931455	0.949048
																s__Bacillus virus Wbeta	40.4335	-4.0895	0.694691	-5.88679	3.93767e-09	3.84778e-08
																s__Klebsiella virus 1513	1941.24	-0.579318	0.330418	-1.75329	0.0795528	0.130153
																s__Klebsiella virus KLPN1	16.2816	0.348061	0.634557	0.54851	0.583342	0.672679
																s__Klebsiella virus KP36	127.246	-3.55796	0.409778	-8.68264	3.86691e-18	1.63741e-16
																s__Klebsiella virus PKP126	44.7838	0.0195486	0.727561	0.0268687	0.978564	0.983058
																s__Klebsiella virus Sushi	8.50883	-3.55859	0.986756	-3.60635	0.000310533	0.00101316
																s__Mycobacterium virus Wildcat	48.8428	1.17807	0.68921	1.70931	0.0873933	0.141633
																s__Gordonia virus Twister6	1.80375	0.536848	1.05091	0.510842	0.609462	0.695546
																s__Gordonia virus Wizard	9.14546	2.38159	0.461565	5.15982	2.47182e-07	1.67539e-06
																s__Gordonia virus Monty	62.7338	2.23239	0.596006	3.74559	0.000179971	0.000627745
																s__Gordonia virus Woes	2170.2	-0.536558	0.484829	-1.1067	0.268426	0.364629
																s__Streptomyces phage phiSAJS1	21.0513	2.19517	0.51819	4.23622	2.27312e-05	0.000101033
																s__Streptomyces virus TP1604	1150.42	0.222346	0.331001	0.671738	0.50175	0.598212
																s__Streptomyces virus YDN12	62.8078	-2.46613	0.606902	-4.06346	4.83496e-05	0.000196898
																s__Roseobacter virus RDJL1	118.763	0.620107	0.505114	1.22766	0.219575	0.309148
																s__Xanthomonas virus OP1	119.02	1.07246	1.01907	1.0524	0.292617	0.391593
																s__Xanthomonas virus Xp10	3.18486	0.764577	0.942155	0.81152	0.417067	0.52073
																s__Xanthomonas virus phil7	3143.13	0.439473	0.225271	1.95086	0.0510734	0.0883299
																s__Alphaproteobacteria virus phiJl001	708.666	0.650423	0.286152	2.27299	0.0230266	0.0443851
																s__Pseudomonas virus M6	0.724956	-1.78938	1.41224	-1.26706	0.205135	0.292266
																s__Pseudomonas virus MP1412	251.539	0.888077	0.310825	2.85716	0.00427446	0.0101908
																s__Pseudomonas virus PAE1	598.727	2.90509	0.484327	5.99821	1.99509e-09	2.07299e-08
																s__Gordonia virus Yvonnetastic	206.246	0.519298	0.274267	1.89341	0.058304	0.0991369
																s__Abalone shriveling syndrome-associated virus	10.7509	-0.431019	0.513019	-0.840162	0.400818	0.505094
																s__Enterobacteria phage P4	443.786	-1.39975	0.432621	-3.23552	0.00121423	0.00337211
																s__Nitrincola phage 1M3-16	303.283	0.208693	0.454117	0.459557	0.645834	0.726034
																s__Salmonella phage BP63	1425.29	-0.600287	0.415796	-1.44371	0.148822	0.222077
																s__Thermus phage phi OH2	222.931	-1.02143	0.383725	-2.66187	0.00777088	0.0170959
																s__Ranid herpesvirus 1	6687.17	0.692141	0.317532	2.17975	0.0292761	0.0548474
																s__Ranid herpesvirus 2	1864.32	-0.742817	0.421623	-1.7618	0.0781025	0.128047
																s__Ranid herpesvirus 3	771.551	1.42548	0.256505	5.55731	2.73961e-08	2.25232e-07
																s__Anguillid herpesvirus 1	316.5	-2.03245	0.345091	-5.88961	3.87114e-09	3.80163e-08
																s__Cyprinid herpesvirus 1	4983.26	-0.0128887	0.256875	-0.050175	0.959983	0.971579
																s__Cyprinid herpesvirus 2	3195.39	0.403482	0.189758	2.1263	0.0334786	0.0611214
																s__Cyprinid herpesvirus 3	862.466	-0.034699	0.273427	-0.126904	0.899016	0.928732
																s__Ictalurid herpesvirus 1	426.732	-1.71388	0.435302	-3.93722	8.24297e-05	0.000317
																s__Ictalurid herpesvirus 2	994.103	1.60616	0.532789	3.01463	0.00257295	0.00649506
																s__Aotine betaherpesvirus 1	3323.94	1.20003	0.27923	4.29764	1.72627e-05	7.90472e-05
																s__Cercopithecine betaherpesvirus 5	1998.69	-0.706982	0.242587	-2.91434	0.00356436	0.00865379
																s__Cynomolgus cytomegalovirus	5053.45	-0.620798	0.341548	-1.8176	0.0691249	0.115075
																s__Human betaherpesvirus 5	3215.68	0.045899	0.294443	0.155884	0.876124	0.910818
																s__Macacine betaherpesvirus 3	125.694	-0.331691	0.634525	-0.522739	0.601156	0.687984
																s__Panine betaherpesvirus 2	5824.29	1.46191	0.25993	5.62425	1.86314e-08	1.58467e-07
																s__Saimiriine betaherpesvirus 4	4897.8	0.0995261	0.29635	0.335839	0.736992	0.802177
																s__Gallid alphaherpesvirus 1	818.705	2.34885	0.411941	5.70191	1.18474e-08	1.06276e-07
																s__Psittacid alphaherpesvirus 1	282.778	-1.97283	0.336336	-5.86566	4.47344e-09	4.33902e-08
																s__Callitrichine gammaherpesvirus 3	338.699	-2.09664	0.378936	-5.53296	3.14873e-08	2.54614e-07
																s__Gorilline gammaherpesvirus 1	2.67796	-2.93027	1.87913	-1.55937	0.118908	0.183343
																s__Human gammaherpesvirus 4	588.743	-0.155663	0.284614	-0.546928	0.584429	0.673144
																s__Macacine gammaherpesvirus 4	1751.14	0.486042	0.226464	2.14622	0.0318556	0.0589452
																s__Alcelaphine gammaherpesvirus 1	1232.48	1.97526	0.376163	5.25108	1.51214e-07	1.05395e-06
																s__Alcelaphine gammaherpesvirus 2	4772.13	-1.07667	0.567619	-1.89682	0.0578517	0.0984529
																s__Bovine gammaherpesvirus 6	15636.5	3.54782	0.563269	6.29863	3.00294e-10	3.62748e-09
																s__Ovine gammaherpesvirus 2	771.265	0.86742	0.368012	2.35704	0.018421	0.0365457
																s__Suid gammaherpesvirus 3	0.6863	-1.50224	1.79297	-0.837851	0.402114	0.505919
																s__Suid gammaherpesvirus 4	438.783	0.708147	0.347173	2.03975	0.0413752	0.0734605
																s__Anatid alphaherpesvirus 1	231.518	1.13634	0.349153	3.25455	0.00113572	0.00317646
																s__Columbid alphaherpesvirus 1	2058.86	-0.755365	0.283125	-2.66796	0.00763136	0.0168549
																s__Gallid alphaherpesvirus 2	2488.74	1.70135	0.51892	3.27863	0.00104313	0.00293837
																s__Gallid alphaherpesvirus 3	986.145	0.776147	0.382727	2.02794	0.0425663	0.0752699
																s__Meleagrid alphaherpesvirus 1	545.428	-2.17233	0.36621	-5.93192	2.99405e-09	3.00015e-08
																s__Sphenicid alphaherpesvirus 1	593.934	-2.95812	0.30805	-9.6027	7.7875e-22	5.89753e-20
																s__Murid betaherpesvirus 1	2056.73	0.485182	0.181786	2.66897	0.00760854	0.0168275
																s__Murid betaherpesvirus 2	3332.06	1.62963	0.338117	4.81973	1.43752e-06	8.26418e-06
																s__Murid betaherpesvirus 8	2638.86	0.0404803	0.222715	0.181759	0.855772	0.897
																s__Equid gammaherpesvirus 2	203.913	0.776727	0.402688	1.92885	0.0537489	0.092228
																s__Equid gammaherpesvirus 5	1663.2	-0.962936	0.267629	-3.59803	0.000320637	0.00104095
																s__Felid gammaherpesvirus 1	2201.57	-0.146311	0.336923	-0.434258	0.664101	0.741068
																s__Mustelid gammaherpesvirus 1	7.69776	0.268805	0.61737	0.435404	0.663269	0.74035
																s__Elephant endotheliotropic herpesvirus 4	2513.57	-1.83747	0.344015	-5.34125	9.23099e-08	6.71934e-07
																s__Elephant endotheliotropic herpesvirus 5	454.026	2.36292	0.296773	7.96204	1.69228e-15	4.69309e-14
																s__Elephantid betaherpesvirus 1	1185.1	0.0187729	0.291696	0.0643576	0.948685	0.963861
																s__Ateline gammaherpesvirus 3	134.012	-0.839819	0.430821	-1.94934	0.0512544	0.088565
																s__Bovine gammaherpesvirus 4	263.37	-2.20974	0.354976	-6.22504	4.81435e-10	5.5598e-09
																s__Common bottlenose dolphin gammaherpesvirus 1 strain Sarasota	4407.25	0.258143	0.456987	0.56488	0.572156	0.66348
																s__Cricetid gammaherpesvirus 2	734.009	0.06525	0.360564	0.180966	0.856394	0.897175
																s__Human gammaherpesvirus 8	3328.69	-0.0162704	0.271375	-0.0599553	0.952191	0.967173
																s__Macacine gammaherpesvirus 5	824.031	1.13301	0.301552	3.75727	0.000171779	0.000600769
																s__Murid gammaherpesvirus 4	1903.56	0.565234	0.389279	1.452	0.146501	0.219195
																s__Saimiriine gammaherpesvirus 2	823.844	-0.229722	0.31786	-0.722715	0.469855	0.568702
																s__Human betaherpesvirus 6A	633.16	-1.5711	0.454119	-3.45967	0.000540836	0.00164767
																s__Human betaherpesvirus 6B	1985.08	0.803033	0.519317	1.54633	0.122026	0.187564
																s__Human betaherpesvirus 7	653.972	-0.529143	0.350905	-1.50794	0.13157	0.199971
																s__Macacine betaherpesvirus 9	440.92	0.535594	0.257755	2.07792	0.037717	0.0678837
																s__Murine roseolovirus	2139.41	-0.433113	0.266639	-1.62434	0.104303	0.163709
																s__Suid betaherpesvirus 2	1082.93	0.70845	0.329253	2.15169	0.0314218	0.0583124
																s__Chelonid alphaherpesvirus 5	550.14	0.0597771	0.437851	0.136524	0.891407	0.922323
																s__Testudinid herpesvirus 3	650.738	-1.4383	0.297963	-4.82709	1.38542e-06	7.97631e-06
																s__Ateline alphaherpesvirus 1	280.293	0.159937	0.444613	0.359721	0.719056	0.787442
																s__Cercopithecine alphaherpesvirus 2	372.457	0.972762	0.391877	2.48232	0.0130532	0.0269692
																s__Fruit bat alphaherpesvirus 1	266.234	0.329995	0.315315	1.04655	0.295305	0.394608
																s__Human alphaherpesvirus 1	152.775	-2.9946	0.379716	-7.88641	3.11014e-15	8.11109e-14
																s__Human alphaherpesvirus 2	290.508	-1.36129	0.414622	-3.2832	0.00102636	0.00289735
																s__Leporid alphaherpesvirus 4	270.901	-0.489614	0.276176	-1.77283	0.0762563	0.125647
																s__Macacine alphaherpesvirus 1	17.4649	-3.63893	0.520289	-6.99405	2.67065e-12	4.43757e-11
																s__Macropodid alphaherpesvirus 1	119.671	-1.58642	0.477914	-3.31946	0.000901927	0.00257937
																s__Panine alphaherpesvirus 3	64.9269	-1.27247	0.488155	-2.60669	0.00914229	0.0197706
																s__Papiine alphaherpesvirus 2	827.36	1.61029	0.331092	4.86357	1.15286e-06	6.76598e-06
																s__Saimiriine alphaherpesvirus 1	2204.79	-0.0612518	0.265192	-0.230972	0.817337	0.863841
																s__Caviid betaherpesvirus 2	4904.4	1.04968	0.23278	4.50934	6.50303e-06	3.23345e-05
																s__Eptesicus fuscus gammaherpesvirus	442.589	-2.61204	0.351022	-7.44124	9.97412e-14	2.04573e-12
																s__Myotis gammaherpesvirus 8	65.9123	-0.335623	0.563679	-0.595416	0.551565	0.644147
																s__Rhinolophus gammaherpesvirus 1	951.639	-1.92512	0.3261	-5.90348	3.55923e-09	3.52167e-08
																s__Tupaiid betaherpesvirus 1	617.965	0.623138	0.355383	1.75343	0.0795284	0.130153
																s__Bovine alphaherpesvirus 1	14.6914	-3.36399	0.566509	-5.93811	2.88326e-09	2.91136e-08
																s__Bovine alphaherpesvirus 5	18.1426	-4.31127	0.726557	-5.93383	2.95939e-09	2.97298e-08
																s__Canid alphaherpesvirus 1	657.673	-0.419797	0.407756	-1.02953	0.30323	0.403419
																s__Cercopithecine alphaherpesvirus 9	81.4858	-3.72407	0.349539	-10.6542	1.6663e-26	2.62476e-24
																s__Equid alphaherpesvirus 1	66.8345	-2.97111	0.401531	-7.39946	1.36739e-13	2.74734e-12
																s__Equid alphaherpesvirus 3	1040.2	0.22655	0.195805	1.15702	0.247265	0.341229
																s__Equid alphaherpesvirus 4	916.933	0.349542	0.326871	1.06936	0.284908	0.383579
																s__Equid alphaherpesvirus 8	0.657716	-1.74012	1.62325	-1.072	0.283722	0.38221
																s__Equid alphaherpesvirus 9	108.075	0.548225	0.430671	1.27295	0.203034	0.289482
																s__Felid alphaherpesvirus 1	33.5637	0.982144	0.406944	2.41346	0.0158016	0.0320097
																s__Human alphaherpesvirus 3	148.829	0.599467	0.568624	1.05424	0.291772	0.390816
																s__Suid alphaherpesvirus 1	226.306	0.937632	0.37984	2.46849	0.0135684	0.0278438
																s__Haliotid herpesvirus 1	1163.59	0.442213	0.247567	1.78623	0.0740614	0.122338
																s__Ostreid herpesvirus 1	2605.95	0.992799	0.291551	3.40523	0.000661072	0.0019722
																s__Bufonid herpesvirus 1	372.93	0.500506	0.283349	1.7664	0.0773295	0.127097
																s__Acidianus filamentous virus 6	0.306083	-0.660762	1.88097	-0.351288	0.725372	0.791717
																s__Acidianus filamentous virus 7	27.4513	2.13577	0.790895	2.70045	0.00692461	0.0154587
																s__Acidianus filamentous virus 8	2.01314	0.797308	1.62204	0.491546	0.62304	0.706256
																s__Acidianus filamentous virus 9	62.4811	-4.55328	0.688667	-6.61172	3.79869e-11	5.23051e-10
																s__Sulfolobus islandicus filamentous virus	392.948	-0.974701	0.434305	-2.24428	0.0248146	0.0475292
																s__Acidianus filamentous virus 2	7.24083	2.79947	0.747568	3.74477	0.000180558	0.000629238
																s__Acidianus filamentous virus 1	1.4862	-1.81957	1.29544	-1.40459	0.160142	0.236074
																s__Acidianus rod-shaped virus 1	5.41474	-1.10477	0.56141	-1.96784	0.0490861	0.0851923
																s__Acidianus rod-shaped virus 2	1425.53	1.74268	0.245623	7.09493	1.29421e-12	2.25514e-11
																s__Stygiolobus rod-shaped virus	481.701	-0.458049	0.358892	-1.27629	0.201854	0.288322
																s__Sulfolobales Mexican rudivirus 1	5.71651	-1.27084	0.77213	-1.64589	0.0997871	0.158145
																s__Sulfolobus islandicus rod-shaped virus 1	1005.15	-1.04698	0.41738	-2.50845	0.0121264	0.0252425
																s__Sulfolobus islandicus rod-shaped virus 10	775.642	-2.32875	0.542568	-4.29209	1.76997e-05	8.05797e-05
																s__Sulfolobus islandicus rod-shaped virus 11	200.933	0.493134	0.367782	1.34083	0.179975	0.260567
																s__Sulfolobus islandicus rod-shaped virus 4	125.152	-4.56999	0.438655	-10.4182	2.04817e-25	2.44415e-23
																s__Sulfolobus islandicus rod-shaped virus 8	0.486743	-0.413867	1.65487	-0.250091	0.802517	0.853447
																s__Sulfolobus islandicus rudivirus 3	95.4131	1.67239	0.456814	3.66098	0.000251255	0.000839222
																s__Betaarterivirus chinrav 1	1784.05	-1.31708	0.389968	-3.37741	0.000731712	0.00215196
																s__Deltaarterivirus pejah	0.607315	2.04743	1.88064	1.08869	0.276292	0.373274
																s__Epsilonarterivirus hemcep	19.4727	-0.662	0.822671	-0.804696	0.420995	0.523321
																s__Gammaarterivirus lacdeh	14.0622	-2.72202	0.595239	-4.57298	4.80832e-06	2.45592e-05
																s__Kappaarterivirus wobum	218.875	0.0645641	0.585763	0.110222	0.912233	0.936493
																s__Muarterivirus afrigant	2.62689	3.4208	1.87949	1.82006	0.0687493	0.114621
																s__Thetaarterivirus kafuba	1.03198	-1.31559	1.45276	-0.905579	0.365159	0.468708
																s__Porcine reproductive and respiratory syndrome virus	29.174	-0.643916	0.576974	-1.11602	0.264412	0.359922
																s__Rodent arterivirus	197.531	0.0491334	0.462828	0.106159	0.915456	0.937931
																s__Southwest baboon virus 1	93.7647	-2.03842	0.233377	-8.73446	2.44821e-18	1.05946e-16
																s__Zetaarterivirus ugarco 1	0.971561	2.24888	1.7651	1.27408	0.202633	0.289015
																s__Alphacoronavirus 1	27.9986	0.381852	0.564271	0.676717	0.498586	0.595165
																s__Bat coronavirus 1A	0.160123	0.529797	1.88159	0.281569	0.778274	NA
																s__Bat coronavirus CDPHE15	242.138	3.57701	0.76371	4.68374	2.81692e-06	1.51131e-05
																s__Bat coronavirus HKU10	5.71616	0.280803	0.410957	0.683292	0.494422	0.591296
																s__BtRf-AlphaCoV/YN2012	61.3504	1.57318	0.699365	2.24944	0.0244846	0.0469428
																s__Coronavirus AcCoV-JC34	283.043	-1.37086	0.372449	-3.68066	0.000232632	0.000782328
																s__Human coronavirus 229E	467.169	-1.63972	0.396567	-4.13478	3.55292e-05	0.000150122
																s__Human coronavirus NL63	60.0523	-1.44962	0.4875	-2.97358	0.00294352	0.00730868
																s__Lucheng Rn rat coronavirus	24.0014	-0.289759	0.489072	-0.592468	0.553537	0.645493
																s__Mink coronavirus 1	487.548	-0.17043	0.313707	-0.543278	0.586938	0.675837
																s__NL63-related bat coronavirus strain BtKYNL63-9b	305.414	1.9355	0.278829	6.94151	3.87936e-12	6.23548e-11
																s__Nyctalus velutinus alphacoronavirus SC-2013	199.677	-1.77256	0.356037	-4.97859	6.40489e-07	4.00356e-06
																s__Porcine epidemic diarrhea virus	42.5053	-3.98905	0.513358	-7.77051	7.8172e-15	1.87708e-13
[truncated: 2,169 more rows]

## Sheet: Supplementary Table 3
Supplementary Table 3. Limma analysis of function (GO, Pfam and KEGG pathway).
	logFC	AveExpr	t	P.Value	adj.P.Val	B	Description
GO:0005737	63.0224	55.9563	6.87195	5.66602e-10	5.8991e-07	12.4539	[CC] cytoplasm
GO:0046872	25.7615	21.0992	6.79763	8.05888e-10	5.8991e-07	12.1198	[MF] metal ion binding
GO:0051287	6.67924	5.12376	6.66649	1.49579e-09	7.29947e-07	11.5332	[MF] NAD binding
GO:0000287	15.1332	12.9876	6.42461	4.62903e-09	1.69422e-06	10.4622	[MF] magnesium ion binding
GO:0008270	14.0336	11.9657	5.79082	8.26243e-08	2.41924e-05	7.73418	[MF] zinc ion binding
GO:0005524	57.6573	55.4871	5.68923	1.29587e-07	3.16192e-05	7.30892	[MF] ATP binding
GO:0030976	2.85204	1.94802	5.65192	1.52736e-07	3.19436e-05	7.15368	[MF] thiamine pyrophosphate binding
GO:0005623	3.94854	2.36109	5.5152	2.77752e-07	5.08286e-05	6.58914	[CC] cell
GO:0051301	5.58944	5.1628	5.41873	4.21787e-07	6.23477e-05	6.19508	[BP] cell division
GO:0005975	13.6501	11.2771	5.4165	4.25872e-07	6.23477e-05	6.18599	[BP] carbohydrate metabolic process
GO:0006526	3.81068	2.92332	5.36819	5.24248e-07	6.48742e-05	5.99007	[BP] arginine biosynthetic process
GO:0050661	3.9112	2.7422	5.35757	5.48673e-07	6.48742e-05	5.94715	[MF] NADP binding
GO:0051539	6.11876	5.59336	5.34128	5.88345e-07	6.48742e-05	5.88136	[MF] 4 iron, 4 sulfur cluster binding
GO:0009097	4.6781	3.99243	5.32889	6.20382e-07	6.48742e-05	5.8314	[BP] isoleucine biosynthetic process
GO:0050660	4.97114	3.95849	5.3065	6.82666e-07	6.66282e-05	5.74126	[MF] flavin adenine dinucleotide binding
GO:0045454	3.09746	1.93555	5.21299	1.01572e-06	9.03069e-05	5.36708	[BP] cell redox homeostasis
GO:0003677	39.9534	33.3418	5.20545	1.04865e-06	9.03069e-05	5.33705	[MF] DNA binding
GO:0009099	4.14824	3.4454	5.19001	1.11932e-06	9.10376e-05	5.27567	[BP] valine biosynthetic process
GO:0009073	3.7877	3.35689	5.11563	1.53031e-06	0.0001127	4.98143	[BP] aromatic amino acid family biosynthetic process
GO:0006457	5.14256	4.94008	5.11419	1.53961e-06	0.0001127	4.97573	[BP] protein folding
GO:0008616	2.8106	1.82708	5.07202	1.83634e-06	0.000128019	4.81001	[BP] queuosine biosynthetic process
GO:0006396	1.34668	0.8136	5.04946	2.01732e-06	0.000134244	4.72166	[BP] RNA processing
GO:0009423	3.46012	3.03078	4.97482	2.74865e-06	0.000174958	4.43103	[BP] chorismate biosynthetic process
GO:0003984	1.59992	1.196	4.95192	3.02095e-06	0.000179095	4.34233	[MF] acetolactate synthase activity
GO:0004553	1.94876	1.22062	4.94893	3.05832e-06	0.000179095	4.33079	[MF] hydrolase activity, hydrolyzing O-glycosyl compounds
GO:0008173	1.07782	0.66629	4.87791	4.09239e-06	0.000230433	4.05743	[MF] RNA methyltransferase activity
GO:0005886	24.7884	20.8493	4.86173	4.37176e-06	0.000237046	3.99548	[CC] plasma membrane
GO:0005509	1.34452	0.9831	4.84341	4.71035e-06	0.000241592	3.92552	[MF] calcium ion binding
GO:0006351	25.7788	20.5207	4.83951	4.78563e-06	0.000241592	3.91065	[BP] transcription, DNA-templated
GO:0030246	2.5436	1.72286	4.80761	5.44755e-06	0.000263764	3.78919	[MF] carbohydrate binding
GO:0016616	2.8385	2.33619	4.80145	5.58518e-06	0.000263764	3.76581	[MF] oxidoreductase activity, acting on the CH-OH group of donors, NAD or NADP as acceptor
GO:0016853	4.34576	2.9568	4.77717	6.16144e-06	0.000281886	3.67378	[MF] isomerase activity
GO:0003942	0.88754	0.55323	4.75709	6.68125e-06	0.000289633	3.5979	[MF] N-acetyl-gamma-glutamyl-phosphate reductase activity
GO:0006400	1.6915	1.24581	4.75541	6.72644e-06	0.000289633	3.59158	[BP] tRNA modification
GO:0007049	3.91376	3.99182	4.69877	8.44404e-06	0.000353202	3.37862	[BP] cell cycle
GO:0005622	9.8012	8.40138	4.66784	9.55404e-06	0.000388531	3.26304	[CC] intracellular
GO:0000155	4.81972	4.0562	4.6361	1.08403e-05	0.000428925	3.14487	[MF] phosphorelay sensor kinase activity
GO:0000049	4.91806	3.82611	4.62121	1.14998e-05	0.000443046	3.08964	[MF] tRNA binding
GO:0003700	20.7516	15.2174	4.58983	1.302e-05	0.000488752	2.97356	[MF] transcription factor activity, sequence-specific DNA binding
GO:1990077	1.08894	0.93019	4.58085	1.34895e-05	0.000493715	2.94045	[CC] primosome complex
GO:0043565	9.93098	7.52979	4.55511	1.49283e-05	0.000533051	2.84575	[MF] sequence-specific DNA binding
GO:0000166	3.67716	3.22062	4.51814	1.72577e-05	0.000601555	2.71032	[MF] nucleotide binding
GO:0009058	2.37704	1.76136	4.47425	2.0481e-05	0.000691059	2.55048	[BP] biosynthetic process
GO:0006412	20.4589	18.6535	4.46753	2.10239e-05	0.000691059	2.52607	[BP] translation
GO:0016597	4.59156	3.8207	4.46488	2.12416e-05	0.000691059	2.51646	[MF] amino acid binding
GO:0016887	13.7045	11.5054	4.43135	2.41899e-05	0.000769868	2.39523	[MF] ATPase activity
GO:0016301	5.83674	4.84647	4.41803	2.54681e-05	0.000793303	2.34722	[MF] kinase activity
GO:0030145	2.10998	1.29625	4.38546	2.88738e-05	0.000869445	2.23023	[MF] manganese ion binding
GO:0003735	19.7078	17.9506	4.38343	2.91003e-05	0.000869445	2.22295	[MF] structural constituent of ribosome
GO:0003676	4.33336	4.1358	4.37482	3.00788e-05	0.000880708	2.19214	[MF] nucleic acid binding
GO:0016491	9.30348	7.74012	4.36751	3.09345e-05	0.000888003	2.166	[MF] oxidoreductase activity
GO:0006779	1.18842	0.80481	4.36056	3.17699e-05	0.000894446	2.14118	[BP] porphyrin-containing compound biosynthetic process
GO:0016787	10.3764	10.1911	4.33465	3.50804e-05	0.000954667	2.04888	[MF] hydrolase activity
GO:0005840	14.4376	12.6292	4.33366	3.52131e-05	0.000954667	2.04536	[CC] ribosome
GO:0048529	1.62276	0.81138	4.3155	3.77378e-05	0.00100451	1.9809	[MF] magnesium-protoporphyrin IX monomethyl ester (oxidative) cyclase activity
GO:0015035	1.9111	1.06365	4.30727	3.89382e-05	0.00101795	1.95176	[MF] protein disulfide oxidoreductase activity
GO:0006096	5.03416	6.3504	4.28989	4.15972e-05	0.00106839	1.8903	[BP] glycolytic process
GO:0005525	4.41618	4.74399	4.28348	4.26198e-05	0.00107578	1.86771	[MF] GTP binding
GO:0019843	14.3503	13.3757	4.24218	4.9822e-05	0.00123626	1.72252	[MF] rRNA binding
GO:0006865	1.24602	0.75573	4.23455	5.12759e-05	0.00125113	1.69579	[BP] amino acid transport
GO:0009165	1.81076	1.18318	4.22761	5.26311e-05	0.00125419	1.67155	[BP] nucleotide biosynthetic process
GO:0009401	7.59554	5.33971	4.22518	5.31144e-05	0.00125419	1.66305	[BP] phosphoenolpyruvate-dependent sugar phosphotransferase system
GO:0008360	3.98816	4.07672	4.21222	5.5766e-05	0.00129589	1.61779	[BP] regulation of cell shape
GO:0016740	6.9085	6.16079	4.20645	5.69845e-05	0.00130352	1.59771	[MF] transferase activity
GO:0030170	3.68496	3.04386	4.19207	6.01387e-05	0.00135451	1.54767	[MF] pyridoxal phosphate binding
GO:0008080	3.62618	2.70411	4.18634	6.1443e-05	0.00136292	1.52775	[MF] N-acetyltransferase activity
GO:0008767	0.7399	0.53377	4.17392	6.43589e-05	0.00140629	1.4847	[MF] UDP-galactopyranose mutase activity
GO:0043169	0.95198	0.89149	4.16957	6.54141e-05	0.00140833	1.4696	[MF] cation binding
GO:0004756	0.62232	0.39724	4.16191	6.73086e-05	0.00142811	1.4431	[MF] selenide, water dikinase activity
GO:0000272	1.08258	0.85213	4.13345	7.48214e-05	0.0015588	1.34492	[BP] polysaccharide catabolic process
GO:0071555	3.73642	3.98961	4.13063	7.56071e-05	0.0015588	1.33523	[BP] cell wall organization
GO:0003824	8.88048	7.17452	4.12689	7.66621e-05	0.0015588	1.32238	[MF] catalytic activity
GO:0003723	5.9303	5.77091	4.11693	7.95435e-05	0.00156969	1.28816	[MF] RNA binding
GO:0004749	0.83122	0.52901	4.1144	8.02924e-05	0.00156969	1.27947	[MF] ribose phosphate diphosphokinase activity
GO:0015297	3.17496	2.67948	4.11399	8.04146e-05	0.00156969	1.27806	[MF] antiporter activity
GO:0070475	1.28836	0.9175	4.1068	8.2579e-05	0.00159073	1.25344	[BP] rRNA base methylation
GO:0015238	3.15914	2.67157	4.10038	8.45607e-05	0.00160775	1.23145	[MF] drug transmembrane transporter activity
GO:0030163	0.6734	0.55384	4.08499	8.95005e-05	0.00165964	1.17883	[BP] protein catabolic process
GO:0006099	1.56268	1.03174	4.08481	8.95571e-05	0.00165964	1.17825	[BP] tricarboxylic acid cycle
GO:0008982	4.55522	3.15623	4.07901	9.14909e-05	0.00166552	1.15845	[MF] protein-N(PI)-phosphohistidine-sugar phosphotransferase activity
GO:0004222	1.25768	1.00604	4.07603	9.25004e-05	0.00166552	1.14828	[MF] metalloendopeptidase activity
GO:0006633	2.50768	2.2553	4.07373	9.32871e-05	0.00166552	1.14044	[BP] fatty acid biosynthetic process
GO:0009089	2.2203	1.91855	4.06339	9.68962e-05	0.00170911	1.10527	[BP] lysine biosynthetic process via diaminopimelate
GO:0006284	1.50092	1.496	4.05714	9.91457e-05	0.00172797	1.08401	[BP] base-excision repair
GO:0004525	0.93904	0.50504	4.04641	0.000103121	0.00177611	1.04761	[MF] ribonuclease III activity
GO:0046654	1.5188	0.9238	4.04168	0.000104924	0.00178616	1.03156	[BP] tetrahydrofolate biosynthetic process
GO:0016209	0.7921	0.67477	4.01936	0.000113836	0.00191559	0.956095	[MF] antioxidant activity
GO:0004712	0.79876	0.5979	3.99044	0.000126465	0.00208028	0.858767	[MF] protein serine/threonine/tyrosine kinase activity
GO:0006109	0.79876	0.5979	3.99044	0.000126465	0.00208028	0.858767	[BP] regulation of carbohydrate metabolic process
GO:0042626	2.6691	2.62411	3.98639	0.000128336	0.0020876	0.845185	[MF] ATPase activity, coupled to transmembrane movement of substances
GO:0016832	1.24788	0.67912	3.96974	0.000136317	0.00219306	0.789403	[MF] aldehyde-lyase activity
GO:0015937	1.8675	1.02651	3.96619	0.00013808	0.00219727	0.777529	[BP] coenzyme A biosynthetic process
GO:0004450	0.9543	0.63861	3.96255	0.000139909	0.00219928	0.765367	[MF] isocitrate dehydrogenase (NADP+) activity
GO:0006397	0.83478	0.45291	3.95705	0.000142713	0.00219928	0.747025	[BP] mRNA processing
GO:0016075	0.83478	0.45291	3.95705	0.000142713	0.00219928	0.747025	[BP] rRNA catabolic process
GO:0016614	0.89542	0.66179	3.94863	0.00014712	0.00224358	0.718922	[MF] oxidoreductase activity, acting on CH-OH group of donors
GO:0003755	3.09428	3.116	3.94322	0.000150013	0.00226412	0.700926	[MF] peptidyl-prolyl cis-trans isomerase activity
GO:0016805	1.21502	1.05235	3.93599	0.000153973	0.00230017	0.67686	[MF] dipeptidase activity
GO:0006260	3.36078	3.34599	3.92735	0.000158832	0.00234878	0.648164	[BP] DNA replication
GO:0047429	2.51754	2.06553	3.9163	0.000165256	0.00241934	0.611552	[MF] nucleoside-triphosphate diphosphatase activity
GO:0015079	0.6258	0.4889	3.89854	0.000176112	0.00248739	0.552818	[MF] potassium ion transmembrane transporter activity
GO:0071424	1.16544	0.85604	3.89566	0.000177939	0.00248739	0.543293	[MF] rRNA (cytosine-N4-)-methyltransferase activity
GO:0008168	3.34008	3.3893	3.89077	0.000181073	0.00248739	0.527184	[MF] methyltransferase activity
GO:0016987	2.17362	1.95961	3.88968	0.000181777	0.00248739	0.523599	[MF] sigma factor activity
GO:0006163	2.40902	2.01127	3.88965	0.000181797	0.00248739	0.523501	[BP] purine nucleotide metabolic process
GO:0009143	2.40902	2.01127	3.88965	0.000181797	0.00248739	0.523501	[BP] nucleoside triphosphate catabolic process
GO:0017111	2.40902	2.01127	3.88965	0.000181797	0.00248739	0.523501	[MF] nucleoside-triphosphatase activity
GO:0004455	2.78774	2.10141	3.88243	0.000186543	0.00252869	0.499723	[MF] ketol-acid reductoisomerase activity
GO:0003725	0.71938	0.55973	3.87979	0.000188314	0.00252928	0.491007	[MF] double-stranded RNA binding
GO:0006418	1.76876	1.56734	3.86827	0.000196202	0.00259983	0.453156	[BP] tRNA aminoacylation for protein translation
GO:0008236	1.66384	1.52764	3.86696	0.000197118	0.00259983	0.44886	[MF] serine-type peptidase activity
GO:0006281	4.09114	5.07251	3.85753	0.000203842	0.00265933	0.417929	[BP] DNA repair
GO:0008658	1.91816	1.82644	3.85557	0.000205262	0.00265933	0.411528	[MF] penicillin binding
GO:0008832	0.61294	0.42037	3.83456	0.000221142	0.00281523	0.342845	[MF] dGTPase activity
GO:0046039	0.61294	0.42037	3.83456	0.000221142	0.00281523	0.342845	[BP] GTP metabolic process
GO:0006355	9.11866	8.66477	3.82578	0.000228115	0.00287897	0.314239	[BP] regulation of transcription, DNA-templated
GO:0003887	1.93494	1.53829	3.81617	0.000235987	0.00295286	0.282988	[MF] DNA-directed DNA polymerase activity
GO:0006364	2.22838	1.70199	3.81289	0.000238735	0.00296193	0.272323	[BP] rRNA processing
GO:0006541	1.7233	1.51835	3.80824	0.00024268	0.00298558	0.257228	[BP] glutamine metabolic process
GO:0008408	1.6608	1.5577	3.78144	0.000266656	0.0032532	0.170497	[MF] 3'-5' exonuclease activity
GO:0008745	1.2418	0.82778	3.77411	0.0002736	0.00329232	0.14684	[MF] N-acetylmuramoyl-L-alanine amidase activity
GO:0006352	1.82318	1.41477	3.7713	0.00027631	0.00329232	0.137772	[BP] DNA-templated transcription, initiation
GO:0016407	1.01582	0.78319	3.76911	0.000278435	0.00329232	0.130725	[MF] acetyltransferase activity
GO:0004731	1.01672	0.69526	3.76868	0.000278857	0.00329232	0.12933	[MF] purine-nucleoside phosphorylase activity
GO:0017004	0.71932	0.63838	3.76345	0.000283999	0.00332619	0.112524	[BP] cytochrome complex assembly
GO:0030435	1.60806	1.23339	3.75874	0.000288719	0.00335464	0.0973626	[BP] sporulation resulting in formation of a cellular spore
GO:0016903	0.57574	0.46903	3.75051	0.000297132	0.0034252	0.0709486	[MF] oxidoreductase activity, acting on the aldehyde or oxo group of donors
GO:0047334	0.87798	0.72753	3.73606	0.000312486	0.00357405	0.024629	[MF] diphosphate-fructose-6-phosphate 1-phosphotransferase activity
GO:0015074	1.00134	0.62849	3.71441	0.000336897	0.00382339	-0.0444892	[BP] DNA integration
GO:0022900	1.02466	0.69349	3.70098	0.000352936	0.0039746	-0.0872074	[BP] electron transport chain
GO:0016021	126.866	105.214	3.69539	0.000359828	0.00402032	-0.104967	[CC] integral component of membrane
GO:0009116	1.98116	1.87688	3.69326	0.000362488	0.00402032	-0.111727	[BP] nucleoside metabolic process
GO:0003896	0.53198	0.45593	3.68254	0.000376147	0.00414045	-0.145683	[MF] DNA primase activity
GO:0004070	1.22994	1.15855	3.66588	0.000398362	0.00433775	-0.198337	[MF] aspartate carbamoyltransferase activity
GO:0006044	1.1876	0.83796	3.66302	0.000402291	0.00433775	-0.207341	[BP] N-acetylglucosamine metabolic process
GO:0051536	2.39488	2.34658	3.66254	0.00040296	0.00433775	-0.208865	[MF] iron-sulfur cluster binding
GO:0000160	2.93882	2.69477	3.65866	0.000408363	0.00436382	-0.221082	[BP] phosphorelay signal transduction system
GO:0006082	0.68352	0.58414	3.64843	0.000422948	0.00442282	-0.253265	[BP] organic acid metabolic process
GO:0006085	0.68352	0.58414	3.64843	0.000422948	0.00442282	-0.253265	[BP] acetyl-CoA biosynthetic process
GO:0008776	0.68352	0.58414	3.64843	0.000422948	0.00442282	-0.253265	[MF] acetate kinase activity
GO:0016810	2.12234	1.77299	3.61385	0.000476	0.00491562	-0.361569	[MF] hydrolase activity, acting on carbon-nitrogen (but not peptide) bonds
GO:0017153	0.78966	0.58275	3.61328	0.000476928	0.00491562	-0.363353	[MF] sodium:dicarboxylate symporter activity
GO:0004519	1.81372	1.51626	3.6113	0.000480146	0.00491562	-0.369512	[MF] endonuclease activity
GO:0009228	1.30942	0.73419	3.60347	0.000493108	0.00497505	-0.39391	[BP] thiamine biosynthetic process
GO:0003872	0.97814	0.79853	3.6011	0.000497107	0.00497505	-0.401307	[MF] 6-phosphofructokinase activity
GO:0006002	0.97814	0.79853	3.6011	0.000497107	0.00497505	-0.401307	[BP] fructose 6-phosphate metabolic process
GO:0004107	1.02478	0.77603	3.59795	0.000502451	0.00497505	-0.411096	[MF] chorismate synthase activity
GO:0008033	1.57864	1.1197	3.59766	0.000502942	0.00497505	-0.411992	[BP] tRNA processing
GO:0004665	0.63652	0.48052	3.59159	0.00051342	0.00497779	-0.430869	[MF] prephenate dehydrogenase (NADP+) activity
GO:0006571	0.63652	0.48052	3.59159	0.00051342	0.00497779	-0.430869	[BP] tyrosine biosynthetic process
GO:0008977	0.63652	0.48052	3.59159	0.00051342	0.00497779	-0.430869	[MF] prephenate dehydrogenase activity
GO:0004109	0.67304	0.54712	3.58416	0.000526516	0.00506696	-0.453924	[MF] coproporphyrinogen oxidase activity
GO:0004812	1.47962	1.42277	3.58247	0.000529539	0.00506696	-0.459164	[MF] aminoacyl-tRNA ligase activity
GO:0017150	1.31792	0.80082	3.57852	0.000536667	0.00506964	-0.471401	[MF] tRNA dihydrouridine synthase activity
GO:0006269	0.55696	0.47428	3.57719	0.000539094	0.00506964	-0.47553	[BP] DNA replication, synthesis of RNA primer
GO:0006102	0.81878	0.57085	3.57494	0.000543209	0.00506964	-0.482487	[BP] isocitrate metabolic process
GO:0006810	7.49994	4.43771	3.57249	0.000547723	0.00506964	-0.49006	[BP] transport
GO:0009982	1.44718	0.90151	3.57208	0.00054849	0.00506964	-0.491339	[MF] pseudouridine synthase activity
GO:0016260	0.6874	0.464	3.57094	0.000550596	0.00506964	-0.494846	[BP] selenocysteine biosynthetic process
GO:0009252	3.5799	4.31713	3.56692	0.000558131	0.0051069	-0.507281	[BP] peptidoglycan biosynthetic process
GO:0043937	0.49842	0.41665	3.55127	0.000588383	0.00535026	-0.555554	[BP] regulation of sporulation
GO:0019877	1.49768	1.47666	3.50865	0.000678809	0.00613442	-0.686183	[BP] diaminopimelate biosynthetic process
GO:0005576	0.65534	0.56915	3.4975	0.000704539	0.00629091	-0.720148	[CC] extracellular region
GO:0043934	0.70944	0.56228	3.49742	0.00070472	0.00629091	-0.720383	[BP] sporulation
GO:0003924	1.95252	2.35088	3.47009	0.000771764	0.00684765	-0.803301	[MF] GTPase activity
GO:0015846	0.4355	0.38359	3.44095	0.000849853	0.00745021	-0.89116	[BP] polyamine transport
GO:0019808	0.4355	0.38359	3.44095	0.000849853	0.00745021	-0.89116	[MF] polyamine binding
GO:0006979	0.91926	0.45963	3.41504	0.000925485	0.00806494	-0.968802	[BP] response to oxidative stress
GO:0004332	1.5601	1.66565	3.41157	0.000936056	0.0081088	-0.979141	[MF] fructose-bisphosphate aldolase activity
GO:0000917	0.6946	0.49014	3.40977	0.000941613	0.00810895	-0.984528	[BP] barrier septum assembly
GO:0015935	3.13464	2.91472	3.38872	0.00100872	0.00861803	-1.04717	[CC] small ribosomal subunit
GO:0009086	0.75622	0.69307	3.38649	0.0010161	0.00861803	-1.0538	[BP] methionine biosynthetic process
GO:0033178	1.11804	1.0578	3.38422	0.00102365	0.00861803	-1.06052	[CC] proton-transporting two-sector ATPase complex, catalytic domain
GO:0008887	0.86054	0.43027	3.38228	0.00103016	0.00861803	-1.06629	[MF] glycerate kinase activity
GO:0031388	0.86054	0.43027	3.38228	0.00103016	0.00861803	-1.06629	[BP] organic acid phosphorylation
GO:0051537	0.89946	0.77881	3.37431	0.00105723	0.00879424	-1.08987	[MF] 2 iron, 2 sulfur cluster binding
GO:0009360	1.22146	0.91623	3.3629	0.00109721	0.00907523	-1.1236	[CC] DNA polymerase III complex
GO:0006561	1.38638	1.01847	3.35666	0.00111967	0.00920896	-1.14201	[BP] proline biosynthetic process
GO:0009229	1.26118	0.66553	3.35098	0.00114049	0.00932778	-1.15875	[BP] thiamine diphosphate biosynthetic process
GO:0032153	0.54134	0.41351	3.33673	0.0011943	0.00955441	-1.20062	[CC] cell division site
GO:0043093	0.54134	0.41351	3.33673	0.0011943	0.00955441	-1.20062	[BP] FtsZ-dependent cytokinesis
GO:0043234	0.54134	0.41351	3.33673	0.0011943	0.00955441	-1.20062	[CC] protein complex
GO:0051258	0.54134	0.41351	3.33673	0.0011943	0.00955441	-1.20062	[BP] protein polymerization
GO:0003899	3.96802	3.12551	3.31645	0.00127499	0.0101445	-1.25994	[MF] DNA-directed RNA polymerase activity
GO:0030420	0.57386	0.49331	3.30155	0.0013375	0.0105424	-1.30335	[BP] establishment of competence for transformation
GO:0004042	0.58326	0.47343	3.29944	0.0013466	0.0105424	-1.3095	[MF] acetyl-CoA:L-glutamate N-acetyltransferase activity
GO:0004358	0.58326	0.47343	3.29944	0.0013466	0.0105424	-1.3095	[MF] glutamate N-acetyltransferase activity
GO:0005618	0.69214	0.56173	3.2915	0.00138129	0.0107564	-1.33255	[CC] cell wall
GO:0005215	5.87464	5.63626	3.28258	0.00142125	0.0110091	-1.35839	[MF] transporter activity
GO:0004794	0.58038	0.54685	3.27156	0.00147215	0.0112921	-1.39027	[MF] L-threonine ammonia-lyase activity
GO:0008176	1.1729	1.13329	3.27133	0.00147321	0.0112921	-1.39092	[MF] tRNA (guanine-N7-)-methyltransferase activity
GO:0000015	2.05636	2.05196	3.26455	0.00150542	0.0114194	-1.4105	[CC] phosphopyruvate hydratase complex
GO:0004634	2.05636	2.05196	3.26455	0.00150542	0.0114194	-1.4105	[MF] phosphopyruvate hydratase activity
GO:0003866	0.66522	0.67459	3.25865	0.00153392	0.0115756	-1.42748	[MF] 3-phosphoshikimate 1-carboxyvinyltransferase activity
GO:0006797	0.44936	0.35212	3.24565	0.00159857	0.0119403	-1.46484	[BP] polyphosphate metabolic process
GO:0043751	0.44936	0.35212	3.24565	0.00159857	0.0119403	-1.46484	[MF] polyphosphate:AMP phosphotransferase activity
GO:0001522	0.6231	0.46485	3.23794	0.00163812	0.0121736	-1.48694	[BP] pseudouridine synthesis
GO:0042777	3.53214	4.10979	3.21992	0.00173413	0.0128221	-1.53844	[BP] plasma membrane ATP synthesis coupled proton transport
GO:0009307	0.56898	0.50185	3.21534	0.00175935	0.0129432	-1.55149	[BP] DNA restriction-modification system
GO:0006662	1.37406	0.79513	3.20695	0.00180644	0.0132231	-1.57535	[BP] glycerol ether metabolic process
GO:0008654	2.92376	3.5351	3.19605	0.00186936	0.0136156	-1.60627	[BP] phospholipid biosynthetic process
GO:0008764	0.95176	0.8801	3.18519	0.00193415	0.0140178	-1.63703	[MF] UDP-N-acetylmuramoylalanine-D-glutamate ligase activity
GO:0016840	0.682	0.341	3.18274	0.00194903	0.0140561	-1.64394	[MF] carbon-nitrogen lyase activity
GO:0004326	0.68436	0.5357	3.18089	0.0019603	0.0140681	-1.64915	[MF] tetrahydrofolylpolyglutamate synthase activity
GO:0000724	0.42558	0.45485	3.17752	0.0019811	0.0141301	-1.65867	[BP] double-strand break repair via homologous recombination
GO:0055085	3.16316	2.5207	3.17637	0.00198826	0.0141301	-1.66192	[BP] transmembrane transport
GO:0009088	0.72602	0.70967	3.15183	0.0021463	0.0151107	-1.73089	[BP] threonine biosynthetic process
GO:0019242	1.35492	1.01742	3.15174	0.00214688	0.0151107	-1.73113	[BP] methylglyoxal biosynthetic process
GO:0033817	0.55272	0.45576	3.14357	0.00220211	0.0154253	-1.75402	[MF] beta-ketoacyl-acyl-carrier-protein synthase II activity
GO:0004160	0.5909	0.61829	3.13518	0.0022601	0.0157561	-1.77744	[MF] dihydroxy-acid dehydratase activity
GO:0006520	1.42526	1.55235	3.13279	0.00227688	0.0157979	-1.7841	[BP] cellular amino acid metabolic process
GO:0004565	0.56888	0.50848	3.12922	0.00230219	0.0158235	-1.79405	[MF] beta-galactosidase activity
GO:0009341	0.56888	0.50848	3.12922	0.00230219	0.0158235	-1.79405	[CC] beta-galactosidase complex
GO:0043190	2.24646	1.72567	3.12263	0.00234962	0.016074	-1.81241	[CC] ATP-binding cassette (ABC) transporter complex
GO:0003992	0.82814	0.60367	3.11461	0.00240852	0.0164003	-1.83469	[MF] N2-acetyl-L-ornithine:2-oxoglutarate 5-aminotransferase activity
GO:0009986	0.45352	0.46824	3.10053	0.00251522	0.0170136	-1.87369	[CC] cell surface
GO:0006567	0.47358	0.49345	3.09967	0.00252183	0.0170136	-1.87605	[BP] threonine catabolic process
GO:0015594	0.44858	0.35065	3.07992	0.00267937	0.0179114	-1.93051	[MF] putrescine-importing ATPase activity
GO:0015595	0.44858	0.35065	3.07992	0.00267937	0.0179114	-1.93051	[MF] spermidine-importing ATPase activity
GO:0046933	3.41174	4.25263	3.07135	0.00275047	0.0183031	-1.95404	[MF] proton-transporting ATP synthase activity, rotational mechanism
GO:0006627	0.96742	0.70491	3.03727	0.00305109	0.0199532	-2.04712	[BP] protein processing involved in protein targeting to mitochondrion
GO:0015095	0.46698	0.42141	3.0371	0.00305262	0.0199532	-2.04757	[MF] magnesium ion transmembrane transporter activity
GO:0015693	0.46698	0.42141	3.0371	0.00305262	0.0199532	-2.04757	[BP] magnesium ion transport
GO:0006259	0.51136	0.4871	3.03707	0.00305295	0.0199532	-2.04767	[BP] DNA metabolic process
GO:0006605	0.47084	0.44702	3.02296	0.00318611	0.0206393	-2.08594	[BP] protein targeting
GO:0065002	0.47084	0.44702	3.02296	0.00318611	0.0206393	-2.08594	[BP] intracellular protein transmembrane transport
GO:0008859	0.54932	0.5818	3.01232	0.00329016	0.0212193	-2.11472	[MF] exoribonuclease II activity
GO:0019402	0.75244	0.72858	3.00964	0.00331685	0.0212976	-2.12196	[BP] galactitol metabolic process
GO:0042254	0.48202	0.47397	3.00214	0.00339257	0.0216887	-2.14217	[BP] ribosome biogenesis
GO:0006207	1.8617	2.26379	2.99985	0.00341599	0.0217435	-2.14833	[BP] 'de novo' pyrimidine nucleobase biosynthetic process
GO:0004568	0.51134	0.46277	2.99658	0.00344969	0.0217687	-2.15712	[MF] chitinase activity
GO:0006032	0.51134	0.46277	2.99658	0.00344969	0.0217687	-2.15712	[BP] chitin catabolic process
GO:0008409	0.4664	0.46702	2.99106	0.00350731	0.0220373	-2.17194	[MF] 5'-3' exonuclease activity
GO:0008479	0.85082	0.80927	2.96696	0.00376962	0.0235843	-2.23643	[MF] queuine tRNA-ribosyltransferase activity
GO:0016879	0.49496	0.24748	2.96426	0.00380005	0.0236735	-2.24362	[MF] ligase activity, forming carbon-nitrogen bonds
GO:0004616	1.02534	0.81381	2.96209	0.00382472	0.0237262	-2.2494	[MF] phosphogluconate dehydrogenase (decarboxylating) activity
GO:0004427	0.6027	0.30135	2.9589	0.00386123	0.0238517	-2.25789	[MF] inorganic diphosphatase activity
GO:0003991	0.79774	0.72225	2.94889	0.00397794	0.0244694	-2.28448	[MF] acetylglutamate kinase activity
GO:0004075	0.53766	0.49723	2.94277	0.00405087	0.0248137	-2.3007	[MF] biotin carboxylase activity
GO:0008237	0.80966	0.53959	2.93503	0.00414489	0.0251829	-2.32118	[MF] metallopeptidase activity
GO:0008289	0.614	0.55596	2.93498	0.00414554	0.0251829	-2.32132	[MF] lipid binding
GO:0006006	0.6281	0.33841	2.93152	0.00418815	0.0253366	-2.33044	[BP] glucose metabolic process
GO:0022857	0.43706	0.43777	2.91134	0.00444521	0.026781	-2.38355	[MF] transmembrane transporter activity
GO:0003678	0.40376	0.39768	2.9065	0.00450898	0.0270539	-2.39624	[MF] DNA helicase activity
GO:0031119	0.82404	0.43666	2.89869	0.00461364	0.0275688	-2.41668	[BP] tRNA pseudouridine synthesis
GO:0008963	0.56468	0.58548	2.89729	0.00463265	0.0275699	-2.42034	[MF] phospho-N-acetylmuramoyl-pentapeptide-transferase activity
GO:0043952	0.43796	0.43058	2.89096	0.0047195	0.0279731	-2.43688	[BP] protein transport by the Sec complex
GO:0045727	0.44658	0.47031	2.88331	0.00482649	0.0284919	-2.45683	[BP] positive regulation of translation
GO:0004088	0.5591	0.27955	2.87352	0.00496643	0.0292002	-2.48226	[MF] carbamoyl-phosphate synthase (glutamine-hydrolyzing) activity
GO:0016747	0.7041	0.68453	2.87028	0.00501361	0.0293597	-2.49067	[MF] transferase activity, transferring acyl groups other than amino-acyl groups
GO:0006289	0.48256	0.38396	2.86788	0.00504879	0.0294102	-2.49688	[BP] nucleotide-excision repair
GO:0006015	0.51392	0.25696	2.86696	0.00506241	0.0294102	-2.49928	[BP] 5-phosphoribose 1-diphosphate biosynthetic process
GO:0009264	0.4899	0.24495	2.84651	0.00537242	0.0310878	-2.55209	[BP] deoxyribonucleotide catabolic process
GO:0006730	1.77222	1.22453	2.83512	0.00555266	0.0320043	-2.58139	[BP] one-carbon metabolic process
GO:0030388	1.08812	1.14132	2.83202	0.00560256	0.0321653	-2.58933	[BP] fructose 1,6-bisphosphate metabolic process
GO:0006310	1.86332	2.53338	2.8254	0.00571065	0.0326578	-2.60628	[BP] DNA recombination
GO:0004821	0.4978	0.43718	2.8205	0.00579193	0.0328659	-2.61882	[MF] histidine-tRNA ligase activity
GO:0006427	0.4978	0.43718	2.8205	0.00579193	0.0328659	-2.61882	[BP] histidyl-tRNA aminoacylation
GO:0003841	0.73028	0.6309	2.81659	0.00585761	0.0331102	-2.62882	[MF] 1-acylglycerol-3-phosphate O-acyltransferase activity
GO:0009056	0.49444	0.42096	2.81344	0.00591092	0.033283	-2.63685	[BP] catabolic process
GO:0004342	0.56598	0.28299	2.8099	0.00597138	0.0334947	-2.64587	[MF] glucosamine-6-phosphate deaminase activity
GO:0009253	1.90466	2.75057	2.80757	0.00601143	0.0335906	-2.65179	[BP] peptidoglycan catabolic process
GO:0046873	0.33256	0.16628	2.79895	0.00616203	0.0343012	-2.67371	[MF] metal ion transmembrane transporter activity
GO:0015940	0.67664	0.33832	2.79198	0.00628635	0.0348607	-2.6914	[BP] pantothenate biosynthetic process
GO:0009002	1.13604	0.76802	2.78627	0.00638983	0.0353008	-2.70585	[MF] serine-type D-Ala-D-Ala carboxypeptidase activity
GO:0006275	0.24772	0.12386	2.78446	0.00642294	0.0353503	-2.71043	[BP] regulation of DNA replication
GO:0006189	2.16782	2.80077	2.77523	0.00659431	0.0361576	-2.73372	[BP] 'de novo' IMP biosynthetic process
GO:0008925	0.26758	0.16573	2.76862	0.00671943	0.0367061	-2.75035	[MF] maltose O-acetyltransferase activity
GO:0051205	0.27156	0.13578	2.76342	0.00681967	0.0369814	-2.76344	[BP] protein insertion into membrane
GO:0015991	2.39152	2.71028	2.76338	0.00682035	0.0369814	-2.76352	[BP] ATP hydrolysis coupled proton transport
GO:0051992	0.52226	0.56427	2.74907	0.00710282	0.038371	-2.79938	[MF] UDP-N-acetylmuramoyl-L-alanyl-D-glutamyl-meso-2,6-diaminopimelyl-D-alanyl-D-alanine:undecaprenyl-phosphate transferase activity
GO:0008929	1.24854	1.07061	2.74622	0.00716037	0.0385396	-2.8065	[MF] methylglyoxal synthase activity
GO:0005506	4.4944	3.54144	2.74154	0.00725566	0.0389095	-2.81818	[MF] iron ion binding
GO:0015109	0.84176	0.7317	2.73892	0.00730969	0.0390562	-2.82473	[MF] chromate transmembrane transporter activity
GO:0070403	0.53436	0.4665	2.73574	0.00737561	0.0392609	-2.83265	[MF] NAD+ binding
GO:0030272	0.7601	0.38005	2.73449	0.00740164	0.0392609	-2.83576	[MF] 5-formyltetrahydrofolate cyclo-ligase activity
GO:0004595	0.76894	0.38447	2.73127	0.00746912	0.0394758	-2.84376	[MF] pantetheine-phosphate adenylyltransferase activity
GO:0004017	0.6514	0.4848	2.71618	0.00779301	0.0410394	-2.88119	[MF] adenylate kinase activity
GO:0004422	0.47646	0.23823	2.71337	0.00785477	0.0411799	-2.88815	[MF] hypoxanthine phosphoribosyltransferase activity
GO:0004479	0.33262	0.16631	2.71241	0.00787594	0.0411799	-2.89052	[MF] methionyl-tRNA formyltransferase activity
GO:0003934	0.70318	0.35159	2.70824	0.00796841	0.041499	-2.90081	[MF] GTP cyclohydrolase I activity
GO:0003951	0.70406	0.80441	2.70711	0.00799367	0.041499	-2.9036	[MF] NAD+ kinase activity
GO:0008830	0.42746	0.24405	2.70107	0.00812991	0.0420572	-2.91848	[MF] dTDP-4-dehydrorhamnose 3,5-epimerase activity
GO:0010181	1.42374	0.71187	2.69878	0.00818226	0.042179	-2.92413	[MF] FMN binding
GO:0020037	0.55034	0.27517	2.69033	0.00837764	0.0430346	-2.9449	[MF] heme binding
GO:0044206	0.72136	0.55718	2.688	0.00843211	0.0431208	-2.9506	[BP] UMP salvage
GO:0009408	0.4556	0.4708	2.6871	0.00845333	0.0431208	-2.95282	[BP] response to heat
GO:0016226	0.64188	0.61326	2.68553	0.00849046	0.0431598	-2.95667	[BP] iron-sulfur cluster assembly
GO:0016783	0.81526	0.56021	2.68358	0.00853677	0.0432451	-2.96146	[MF] sulfurtransferase activity
GO:0005978	1.25066	0.86925	2.67233	0.00880792	0.0444648	-2.98895	[BP] glycogen biosynthetic process
GO:0016114	1.25108	1.3261	2.67041	0.00885498	0.0445488	-2.99363	[BP] terpenoid biosynthetic process
GO:0003729	0.55754	0.39133	2.66771	0.00892151	0.0446034	-3.00021	[MF] mRNA binding
GO:0006298	0.23882	0.18929	2.66553	0.00897568	0.0446034	-3.00553	[BP] mismatch repair
GO:0030983	0.23882	0.18929	2.66553	0.00897568	0.0446034	-3.00553	[MF] mismatched DNA binding
GO:0004003	0.7592	0.8631	2.66504	0.00898772	0.0446034	-3.00671	[MF] ATP-dependent DNA helicase activity
GO:0006313	0.9702	0.62654	2.66142	0.00907835	0.044901	-3.01552	[BP] transposition, DNA-mediated
GO:0004190	0.7545	0.65145	2.65601	0.00921532	0.045425	-3.02867	[MF] aspartic-type endopeptidase activity
GO:0009245	1.10948	0.90604	2.64952	0.00938194	0.0460911	-3.0444	[BP] lipid A biosynthetic process
GO:0000162	0.8648	0.4324	2.63934	0.00964897	0.0472445	-3.06902	[BP] tryptophan biosynthetic process
GO:0008811	0.68684	0.5191	2.63482	0.00976957	0.0476755	-3.07992	[MF] chloramphenicol O-acetyltransferase activity
GO:0004491	0.53956	0.26978	2.63346	0.00980622	0.0476954	-3.0832	[MF] methylmalonate-semialdehyde dehydrogenase (acylating) activity
GO:0034227	0.39544	0.23266	2.629	0.00992705	0.0481232	-3.09394	[BP] tRNA thio-modification
GO:0004146	0.97956	0.65418	2.62508	0.0100345	0.0483238	-3.10337	[MF] dihydrofolate reductase activity
GO:0006545	0.97956	0.65418	2.62508	0.0100345	0.0483238	-3.10337	[BP] glycine biosynthetic process
GO:0034023	0.94254	0.80949	2.62042	0.0101633	0.0487838	-3.11454	[MF] 5-(carboxyamino)imidazole ribonucleotide mutase activity
GO:0004612	1.74102	1.94021	2.60811	0.0105114	0.0502898	-3.14403	[MF] phosphoenolpyruvate carboxykinase (ATP) activity
GO:0044205	2.17482	3.21577	2.60422	0.0106236	0.050661	-3.15332	[BP] 'de novo' UMP biosynthetic process
GO:0006014	0.44494	0.41177	2.59911	0.0107724	0.0512039	-3.16549	[BP] D-ribose metabolic process
GO:0009001	0.5556	0.2778	2.59415	0.0109188	0.0517316	-3.17729	[MF] serine O-acetyltransferase activity
GO:0004329	0.29754	0.16173	2.5856	0.0111754	0.0526652	-3.1976	[MF] formate-tetrahydrofolate ligase activity
GO:0046417	0.37112	0.3643	2.5852	0.0111878	0.0526652	-3.19857	[BP] chorismate metabolic process
GO:0000774	0.51808	0.48548	2.5838	0.0112302	0.0526956	-3.20188	[MF] adenyl-nucleotide exchange factor activity
GO:0008483	0.537	0.32624	2.58182	0.0112905	0.0528092	-3.20656	[MF] transaminase activity
GO:0051920	0.79178	0.54515	2.57541	0.0114885	0.053564	-3.22174	[MF] peroxiredoxin activity
GO:0009435	0.95482	0.75173	2.56123	0.0119368	0.0554779	-3.25516	[BP] NAD biosynthetic process
GO:0008840	0.63802	0.71281	2.55315	0.0121995	0.0565192	-3.27414	[MF] 4-hydroxy-tetrahydrodipicolinate synthase
GO:0008733	0.55756	0.27878	2.54692	0.0124056	0.0571125	-3.28874	[MF] L-arabinose isomerase activity
GO:0019569	0.55756	0.27878	2.54692	0.0124056	0.0571125	-3.28874	[BP] L-arabinose catabolic process to xylulose 5-phosphate
GO:0008448	0.6216	0.55496	2.54337	0.0125243	0.0572568	-3.29704	[MF] N-acetylglucosamine-6-phosphate deacetylase activity
GO:0003688	0.2136	0.1068	2.54248	0.0125543	0.0572568	-3.29912	[MF] DNA replication origin binding
GO:0006270	0.2136	0.1068	2.54248	0.0125543	0.0572568	-3.29912	[BP] DNA replication initiation
GO:0050515	0.57954	0.41067	2.52963	0.0129938	0.0589809	-3.32909	[MF] 4-(cytidine 5'-diphospho)-2-C-methyl-D-erythritol kinase activity
GO:0006220	0.49066	0.24533	2.52908	0.0130129	0.0589809	-3.33036	[BP] pyrimidine nucleotide metabolic process
GO:0000105	1.42276	1.09814	2.52705	0.0130835	0.0590697	-3.33508	[BP] histidine biosynthetic process
GO:0016881	0.1619	0.08095	2.52621	0.0131131	0.0590697	-3.33704	[MF] acid-amino acid ligase activity
GO:0055129	0.98562	1.12129	2.51581	0.0134817	0.0603396	-3.36115	[BP] L-proline biosynthetic process
GO:0004674	0.8311	1.11811	2.51365	0.0135594	0.0603396	-3.36615	[MF] protein serine/threonine kinase activity
GO:0008973	0.3224	0.1612	2.51364	0.0135599	0.0603396	-3.36619	[MF] phosphopentomutase activity
GO:0043094	0.3224	0.1612	2.51364	0.0135599	0.0603396	-3.36619	[BP] cellular metabolic compound salvage
GO:0004640	0.47026	0.23513	2.49876	0.0141065	0.0625817	-3.40052	[MF] phosphoribosylanthranilate isomerase activity
GO:0004177	0.32366	0.16183	2.49697	0.0141734	0.0626884	-3.40463	[MF] aminopeptidase activity
GO:0004106	0.4285	0.39299	2.48798	0.0145149	0.063622	-3.42529	[MF] chorismate mutase activity
GO:0004664	0.4285	0.39299	2.48798	0.0145149	0.063622	-3.42529	[MF] prephenate dehydratase activity
GO:0009094	0.4285	0.39299	2.48798	0.0145149	0.063622	-3.42529	[BP] L-phenylalanine biosynthetic process
GO:0009396	0.53068	0.33324	2.48666	0.0145656	0.063654	-3.42832	[BP] folic acid-containing compound biosynthetic process
GO:0004252	1.55978	2.02201	2.48057	0.0148017	0.064493	-3.44227	[MF] serine-type endopeptidase activity
GO:0008901	0.66764	0.35978	2.46283	0.0155086	0.0673726	-3.4827	[MF] ferredoxin hydrogenase activity
GO:0050570	0.42762	0.21381	2.44968	0.0160522	0.0695278	-3.51252	[MF] 4-hydroxythreonine-4-phosphate dehydrogenase activity
GO:0043022	1.38128	1.4548	2.44603	0.0162059	0.0699866	-3.52076	[MF] ribosome binding
GO:0008889	0.25318	0.12659	2.43801	0.0165485	0.0712558	-3.53885	[MF] glycerophosphodiester phosphodiesterase activity
GO:0007059	0.34864	0.22282	2.4348	0.0166874	0.0715048	-3.54607	[BP] chromosome segregation
GO:0004845	0.5973	0.53853	2.43442	0.016704	0.0715048	-3.54693	[MF] uracil phosphoribosyltransferase activity
GO:0043023	0.36416	0.40796	2.42483	0.0171259	0.0730971	-3.56848	[MF] ribosomal large subunit binding
GO:0006402	0.42364	0.23986	2.41826	0.0174199	0.0741357	-3.58317	[BP] mRNA catabolic process
GO:0006166	0.93786	0.82675	2.41515	0.0175611	0.0745202	-3.59014	[BP] purine ribonucleoside salvage
GO:0019104	0.54518	0.57147	2.41133	0.0177353	0.0750018	-3.59865	[MF] DNA N-glycosylase activity
GO:0044210	0.39772	0.25824	2.41042	0.0177771	0.0750018	-3.60068	[BP] 'de novo' CTP biosynthetic process
GO:0004071	0.65914	0.65681	2.40724	0.017924	0.0751882	-3.60778	[MF] aspartate-ammonia ligase activity
GO:0070981	0.65914	0.65681	2.40724	0.017924	0.0751882	-3.60778	[BP] L-asparagine biosynthetic process
GO:0032784	0.5203	0.26015	2.40502	0.0180271	0.0754048	-3.61272	[BP] regulation of DNA-templated transcription, elongation
GO:0008484	0.51058	0.33625	2.39934	0.0182931	0.0762992	-3.62535	[MF] sulfuric ester hydrolase activity
GO:0016829	2.14754	3.15515	2.39415	0.0185392	0.0771064	-3.63686	[MF] lyase activity
GO:0046168	0.5946	0.6569	2.38514	0.0189732	0.0786878	-3.65678	[BP] glycerol-3-phosphate catabolic process
GO:0006235	0.78752	0.74726	2.38357	0.0190498	0.0787823	-3.66025	[BP] dTTP biosynthetic process
GO:0004810	0.33972	0.2048	2.37864	0.0192922	0.0795599	-3.67112	[MF] tRNA adenylyltransferase activity
GO:0008839	0.44356	0.22178	2.36969	0.0197394	0.0809602	-3.69083	[MF] 4-hydroxy-tetrahydrodipicolinate reductase
GO:0045892	0.99806	1.19197	2.36963	0.0197423	0.0809602	-3.69096	[BP] negative regulation of transcription, DNA-templated
GO:0008808	0.17416	0.08708	2.36525	0.0199644	0.0814148	-3.70057	[MF] cardiolipin synthase activity
GO:0032049	0.17416	0.08708	2.36525	0.0199644	0.0814148	-3.70057	[BP] cardiolipin biosynthetic process
GO:0016874	1.48644	1.2309	2.35713	0.0203821	0.0827288	-3.71835	[MF] ligase activity
GO:0015934	2.88092	3.12588	2.35611	0.0204349	0.0827288	-3.72058	[CC] large ribosomal subunit
GO:0009037	0.26802	0.15999	2.35385	0.0205525	0.0827288	-3.7255	[MF] tyrosine-based site-specific recombinase activity
GO:0008897	0.543	0.46458	2.35371	0.02056	0.0827288	-3.72581	[MF] holo-[acyl-carrier-protein] synthase activity
GO:0006223	0.50618	0.44959	2.35321	0.020586	0.0827288	-3.7269	[BP] uracil salvage
GO:0009098	0.73456	0.71034	2.35246	0.0206257	0.0827288	-3.72855	[BP] leucine biosynthetic process
GO:0006098	1.03338	1.22917	2.34992	0.0207593	0.0830372	-3.73409	[BP] pentose-phosphate shunt
GO:0019146	0.47442	0.23721	2.34427	0.021059	0.0836034	-3.74639	[MF] arabinose-5-phosphate isomerase activity
GO:0006796	0.41702	0.20851	2.34362	0.0210939	0.0836034	-3.74781	[BP] phosphate-containing compound metabolic process
GO:0033014	0.45742	0.22871	2.34337	0.0211074	0.0836034	-3.74835	[BP] tetrapyrrole biosynthetic process
GO:0035999	0.48348	0.33634	2.34296	0.0211293	0.0836034	-3.74924	[BP] tetrahydrofolate interconversion
GO:0070929	0.65642	0.54213	2.34015	0.0212801	0.0837792	-3.75534	[BP] trans-translation
GO:0019632	0.2213	0.11065	2.33958	0.021311	0.0837792	-3.75659	[BP] shikimate metabolic process
GO:0019288	1.07326	1.21371	2.33894	0.0213454	0.0837792	-3.75797	[BP] isopentenyl diphosphate biosynthetic process, methylerythritol 4-phosphate pathway
GO:0070038	1.3391	1.03571	2.33467	0.0215772	0.0844625	-3.76722	[MF] rRNA (pseudouridine-N3-)-methyltransferase activity
GO:0008780	0.44392	0.22196	2.3226	0.0222452	0.0868452	-3.79334	[MF] acyl-[acyl-carrier-protein]-UDP-N-acetylglucosamine O-acyltransferase activity
GO:0006353	0.38492	0.20988	2.31382	0.0227424	0.08855	-3.81225	[BP] DNA-templated transcription, termination
GO:0004132	0.4366	0.2183	2.31066	0.0229235	0.0890185	-3.81903	[MF] dCMP deaminase activity
GO:0008987	0.78822	0.57269	2.30673	0.0231507	0.0896632	-3.82746	[MF] quinolinate synthetase A activity
GO:0015225	0.48826	0.42597	2.30449	0.0232814	0.0899312	-3.83227	[MF] biotin transporter activity
GO:0004476	0.41414	0.23179	2.30313	0.0233609	0.0900009	-3.83519	[MF] mannose-6-phosphate isomerase activity
GO:0008833	0.41532	0.23458	2.29799	0.0236634	0.090927	-3.84618	[MF] deoxyribonuclease IV (phage-T4-induced) activity
GO:0034979	0.42444	0.41154	2.29386	0.023909	0.0916302	-3.85499	[MF] NAD-dependent protein deacetylase activity
GO:0046912	0.20226	0.10113	2.28471	0.0244609	0.0935006	-3.87447	[MF] transferase activity, transferring acyl groups, acyl groups converted into alkyl on transfer
GO:0043115	0.43466	0.21733	2.25629	0.0262482	0.0999628	-3.93455	[MF] precorrin-2 dehydrogenase activity
GO:0004644	0.47148	0.23574	2.25568	0.026288	0.0999628	-3.93584	[MF] phosphoribosylglycinamide formyltransferase activity
GO:0034220	1.0338	0.7331	2.24609	0.0269173	0.10209	-3.95595	[BP] ion transmembrane transport
GO:0007155	0.46994	0.58741	2.24461	0.0270155	0.102198	-3.95904	[BP] cell adhesion
GO:0015572	0.1726	0.0863	2.24189	0.0271972	0.102357	-3.96474	[MF] N-acetylglucosamine transmembrane transporter activity
GO:0019866	0.1726	0.0863	2.24189	0.0271972	0.102357	-3.96474	[CC] organelle inner membrane
GO:0016746	0.32926	0.16463	2.24068	0.027278	0.102397	-3.96726	[MF] transferase activity, transferring acyl groups
GO:0036361	0.22378	0.11189	2.23893	0.027396	0.102577	-3.97092	[MF] racemase activity, acting on amino acids and derivatives
GO:0009113	0.62324	0.85394	2.23336	0.0277729	0.103542	-3.98253	[BP] purine nucleobase biosynthetic process
GO:0004817	0.38836	0.19418	2.232	0.0278658	0.103542	-3.98536	[MF] cysteine-tRNA ligase activity
GO:0006423	0.38836	0.19418	2.232	0.0278658	0.103542	-3.98536	[BP] cysteinyl-tRNA aminoacylation
GO:0008534	0.33068	0.30802	2.22456	0.0283783	0.105175	-4.00082	[MF] oxidized purine nucleobase lesion DNA N-glycosylase activity
GO:0017061	0.25578	0.12789	2.22276	0.028504	0.105175	-4.00457	[MF] S-methyl-5-thioadenosine phosphorylase activity
GO:0035998	0.47488	0.23744	2.22251	0.0285209	0.105175	-4.00507	[BP] 7,8-dihydroneopterin 3'-triphosphate biosynthetic process
GO:0016462	0.4976	0.29532	2.22061	0.028654	0.105401	-4.00902	[MF] pyrophosphatase activity
GO:0008108	1.06744	0.78162	2.21386	0.0291298	0.106882	-4.02298	[MF] UDP-glucose:hexose-1-phosphate uridylyltransferase activity
GO:0004370	0.40854	0.53501	2.20873	0.0294967	0.107304	-4.03358	[MF] glycerol kinase activity
GO:0019563	0.40854	0.53501	2.20873	0.0294967	0.107304	-4.03358	[BP] glycerol catabolic process
GO:0004372	0.1822	0.0911	2.20815	0.0295379	0.107304	-4.03476	[MF] glycine hydroxymethyltransferase activity
GO:0019264	0.1822	0.0911	2.20815	0.0295379	0.107304	-4.03476	[BP] glycine biosynthetic process from serine
GO:0006535	0.48694	0.24347	2.20145	0.0300236	0.108798	-4.04857	[BP] cysteine biosynthetic process from serine
GO:0004733	0.251	0.1255	2.19338	0.0306175	0.11066	-4.06513	[MF] pyridoxamine-phosphate oxidase activity
GO:0050380	0.63288	0.7509	2.19044	0.0308359	0.11066	-4.07114	[MF] undecaprenyl-diphosphatase activity
GO:0016020	0.78758	0.96027	2.19042	0.0308376	0.11066	-4.07119	[CC] membrane
GO:0004765	0.80334	0.77693	2.19032	0.0308448	0.11066	-4.07139	[MF] shikimate kinase activity
GO:0043365	0.43832	0.21916	2.18938	0.0309153	0.11066	-4.07332	[MF] [formate-C-acetyltransferase]-activating enzyme activity
GO:0009156	0.34444	0.17222	2.18727	0.0310738	0.110956	-4.07764	[BP] ribonucleoside monophosphate biosynthetic process
GO:0004789	0.40808	0.20404	2.18395	0.0313241	0.111578	-4.08442	[MF] thiamine-phosphate diphosphorylase activity
GO:0004815	0.432	0.216	2.17975	0.0316438	0.112136	-4.09299	[MF] aspartate-tRNA ligase activity
GO:0004601	0.58874	0.44363	2.17934	0.0316749	0.112136	-4.09382	[MF] peroxidase activity
GO:0008152	0.69302	0.50005	2.17842	0.0317448	0.112136	-4.09568	[BP] metabolic process
GO:0004803	0.70218	0.46655	2.17609	0.0319241	0.112136	-4.10044	[MF] transposase activity
GO:0015969	0.9573	0.73007	2.17603	0.0319287	0.112136	-4.10056	[BP] guanosine tetraphosphate metabolic process
GO:0003883	0.33784	0.19492	2.17435	0.0320581	0.112136	-4.10397	[MF] CTP synthase activity
GO:0016765	0.48662	0.36669	2.17395	0.032089	0.112136	-4.10478	[MF] transferase activity, transferring alkyl or aryl (other than methyl) groups
GO:0008998	0.7131	0.55523	2.17389	0.0320936	0.112136	-4.1049	[MF] ribonucleoside-triphosphate reductase activity
GO:0042823	0.50666	0.25333	2.1721	0.0322324	0.112353	-4.10855	[BP] pyridoxal phosphate biosynthetic process
GO:0018112	0.15608	0.07804	2.16842	0.0325189	0.113083	-4.11601	[MF] proline racemase activity
GO:0004140	0.57068	0.28534	2.16482	0.0328013	0.113794	-4.1233	[MF] dephospho-CoA kinase activity
GO:0003862	0.38568	0.5359	2.16134	0.0330769	0.114479	-4.13035	[MF] 3-isopropylmalate dehydrogenase activity
GO:0008837	0.2898	0.1449	2.15987	0.0331935	0.114612	-4.13332	[MF] diaminopimelate epimerase activity
GO:0004360	0.34916	0.17458	2.1468	0.0342486	0.117699	-4.15966	[MF] glutamine-fructose-6-phosphate transaminase (isomerizing) activity
GO:1901137	0.34916	0.17458	2.1468	0.0342486	0.117699	-4.15966	[BP] carbohydrate derivative biosynthetic process
GO:0015450	0.87924	0.43962	2.14556	0.0343501	0.117772	-4.16215	[MF] P-P-bond-hydrolysis-driven protein transmembrane transporter activity
GO:0001682	0.92516	0.59504	2.13893	0.0348975	0.117804	-4.17545	[BP] tRNA 5'-leader removal
GO:0004526	0.92516	0.59504	2.13893	0.0348975	0.117804	-4.17545	[MF] ribonuclease P activity
GO:0004585	0.33634	0.16817	2.13758	0.0350096	0.117804	-4.17814	[MF] ornithine carbamoyltransferase activity
GO:0004045	0.43998	0.21999	2.13697	0.0350611	0.117804	-4.17938	[MF] aminoacyl-tRNA hydrolase activity
GO:0004735	0.29608	0.14804	2.13673	0.0350809	0.117804	-4.17986	[MF] pyrroline-5-carboxylate reductase activity
GO:0006537	0.22292	0.11146	2.13622	0.0351237	0.117804	-4.18088	[BP] glutamate biosynthetic process
GO:0008948	-0.93594	0.58019	-2.13616	0.0351283	0.117804	-4.18099	[MF] oxaloacetate decarboxylase activity
GO:0003697	0.43856	0.37914	2.1358	0.0351588	0.117804	-4.18172	[MF] single-stranded DNA binding
GO:0030091	0.33678	0.16839	2.13579	0.0351598	0.117804	-4.18174	[BP] protein repair
GO:0016788	0.66042	0.74475	2.13573	0.0351642	0.117804	-4.18185	[MF] hydrolase activity, acting on ester bonds
GO:0009249	0.19464	0.09732	2.13379	0.0353272	0.11808	-4.18573	[BP] protein lipoylation
GO:0004333	0.52668	0.3793	2.13228	0.0354544	0.118201	-4.18875	[MF] fumarate hydratase activity
GO:0009082	0.48426	0.29737	2.13026	0.035625	0.118201	-4.19279	[BP] branched-chain amino acid biosynthetic process
GO:0003746	0.9774	1.42012	2.12959	0.0356817	0.118201	-4.19412	[MF] translation elongation factor activity
GO:0008649	0.15088	0.07544	2.12954	0.0356863	0.118201	-4.19423	[MF] rRNA methyltransferase activity
GO:0036355	0.28142	0.14071	2.12337	0.0362122	0.119672	-4.20651	[MF] 2-iminoacetate synthase activity
GO:0004788	0.2954	0.1477	2.12215	0.036317	0.119748	-4.20894	[MF] thiamine diphosphokinase activity
GO:0080130	0.44058	0.24101	2.11245	0.0371605	0.122254	-4.22819	[MF] L-phenylalanine:2-oxoglutarate aminotransferase activity
GO:0008760	0.25234	0.12617	2.11144	0.0372492	0.122271	-4.23019	[MF] UDP-N-acetylglucosamine 1-carboxyvinyltransferase activity
GO:0009166	0.30468	0.27884	2.10613	0.0377187	0.123535	-4.24068	[BP] nucleotide catabolic process
GO:0004371	0.3985	0.19925	2.10304	0.0379945	0.123884	-4.24679	[MF] glycerone kinase activity
GO:0006071	0.3985	0.19925	2.10304	0.0379945	0.123884	-4.24679	[BP] glycerol metabolic process
GO:0004852	0.22938	0.11469	2.09554	0.038671	0.125804	-4.26156	[MF] uroporphyrinogen-III synthase activity
GO:0047850	0.39014	0.47315	2.09461	0.0387552	0.125804	-4.26338	[MF] diaminopimelate dehydrogenase activity
GO:0004725	0.46906	0.27603	2.09158	0.039032	0.126422	-4.26933	[MF] protein tyrosine phosphatase activity
GO:0006012	1.17852	1.1171	2.08993	0.0391832	0.126515	-4.27256	[BP] galactose metabolic process
GO:0000271	0.3922	0.1961	2.08939	0.0392333	0.126515	-4.27363	[BP] polysaccharide biosynthetic process
GO:0006268	0.38084	0.19042	2.08135	0.0399785	0.128433	-4.28936	[BP] DNA unwinding involved in DNA replication
GO:0008757	0.60244	0.54086	2.08108	0.0400038	0.128433	-4.28989	[MF] S-adenosylmethionine-dependent methyltransferase activity
GO:0009306	0.85104	0.42552	2.07562	0.0405178	0.129799	-4.30055	[BP] protein secretion
GO:0045263	1.3249	1.47387	2.07285	0.0407805	0.129937	-4.30594	[CC] proton-transporting ATP synthase complex, coupling factor F(o)
GO:0008725	0.30756	0.15378	2.072	0.040861	0.129937	-4.30759	[MF] DNA-3-methyladenine glycosylase activity
GO:0009102	0.37824	0.18912	2.0708	0.0409756	0.129937	-4.30992	[BP] biotin biosynthetic process
GO:0004605	0.3106	0.1553	2.0705	0.0410047	0.129937	-4.31051	[MF] phosphatidate cytidylyltransferase activity
GO:0016024	0.3106	0.1553	2.0705	0.0410047	0.129937	-4.31051	[BP] CDP-diacylglycerol biosynthetic process
GO:0004591	0.53984	0.26992	2.06957	0.0410937	0.129938	-4.31232	[MF] oxoglutarate dehydrogenase (succinyl-transferring) activity
GO:0004556	0.12836	0.06418	2.06633	0.0414049	0.13064	-4.31862	[MF] alpha-amylase activity
GO:0019318	0.29712	0.14856	2.06509	0.0415241	0.130734	-4.32101	[BP] hexose metabolic process
GO:0006772	0.26272	0.13136	2.06396	0.0416334	0.130797	-4.3232	[BP] thiamine metabolic process
GO:0004359	0.40216	0.20108	2.05245	0.0427612	0.134052	-4.34547	[MF] glutaminase activity
GO:0008175	0.5901	0.53469	2.05074	0.0429307	0.134296	-4.34876	[MF] tRNA methyltransferase activity
GO:0015833	1.2371	0.65931	2.04806	0.0431973	0.134354	-4.35392	[BP] peptide transport
GO:0000103	0.35592	0.17796	2.04785	0.0432183	0.134354	-4.35432	[BP] sulfate assimilation
GO:0008460	0.32842	0.16421	2.04779	0.0432245	0.134354	-4.35444	[MF] dTDP-glucose 4,6-dehydratase activity
GO:0004425	0.28462	0.14231	2.0464	0.0433638	0.134501	-4.35712	[MF] indole-3-glycerol-phosphate synthase activity
GO:0004141	0.4306	0.2153	2.03966	0.0440438	0.136322	-4.37006	[MF] dethiobiotin synthase activity
GO:0008452	0.17246	0.08623	2.03853	0.0441592	0.13639	-4.37223	[MF] RNA ligase activity
GO:0004324	0.09288	0.04644	2.03211	0.0448171	0.138131	-4.38452	[MF] ferredoxin-NADP+ reductase activity
GO:0015675	0.14228	0.07114	2.03044	0.0449895	0.138287	-4.3877	[BP] nickel cation transport
GO:0001123	0.35036	0.54488	2.02916	0.0451226	0.138287	-4.39016	[BP] transcription initiation from bacterial-type RNA polymerase promoter
GO:0044659	0.10082	0.05041	2.02889	0.045151	0.138287	-4.39068	[BP] cytolysis by virus of host cell
GO:0019277	0.15796	0.07898	2.02592	0.0454592	0.13894	-4.39633	[BP] UDP-N-acetylgalactosamine biosynthetic process
GO:0006529	0.27874	0.13937	2.02444	0.0456141	0.139108	-4.39915	[BP] asparagine biosynthetic process
GO:0004523	0.54696	0.49598	2.02185	0.0458862	0.139108	-4.40408	[MF] RNA-DNA hybrid ribonuclease activity
GO:0004751	0.76424	0.72566	2.02178	0.0458938	0.139108	-4.40422	[MF] ribose-5-phosphate isomerase activity
GO:0008955	0.39932	0.19966	2.02089	0.0459875	0.139108	-4.40591	[MF] peptidoglycan glycosyltransferase activity
GO:0000156	0.43368	0.21684	2.02087	0.0459893	0.139108	-4.40594	[MF] phosphorelay response regulator activity
GO:0070401	0.32816	0.16408	2.01965	0.0461187	0.139212	-4.40828	[MF] NADP+ binding
GO:0031564	0.16158	0.09821	2.01519	0.0465922	0.140352	-4.41674	[BP] transcription antitermination
GO:0004832	0.53352	0.26676	2.01251	0.0468784	0.140439	-4.42182	[MF] valine-tRNA ligase activity
GO:0006438	0.53352	0.26676	2.01251	0.0468784	0.140439	-4.42182	[BP] valyl-tRNA aminoacylation
GO:0015171	0.3796	0.1898	2.01223	0.0469088	0.140439	-4.42235	[MF] amino acid transmembrane transporter activity
GO:0016857	0.50896	0.25448	2.01094	0.0470471	0.140565	-4.42479	[MF] racemase and epimerase activity, acting on carbohydrates and derivatives
GO:0008234	0.19668	0.09834	2.00813	0.04735	0.141182	-4.43011	[MF] cysteine-type peptidase activity
GO:0004559	0.11206	0.05603	2.00576	0.0476062	0.14137	-4.43458	[MF] alpha-mannosidase activity
GO:0006013	0.11206	0.05603	2.00576	0.0476062	0.14137	-4.43458	[BP] mannose metabolic process
GO:0004350	0.56278	0.68565	2.003	0.047907	0.141919	-4.43979	[MF] glutamate-5-semialdehyde dehydrogenase activity
GO:0006231	0.89968	1.38576	2.00147	0.0480745	0.141919	-4.44268	[BP] dTMP biosynthetic process
GO:0005993	0.15494	0.07747	2.00141	0.0480817	0.141919	-4.4428	[BP] trehalose catabolic process
GO:0005298	0.2858	0.38998	1.9972	0.0485439	0.14227	-4.45071	[MF] proline:sodium symporter activity
GO:0031402	0.2858	0.38998	1.9972	0.0485439	0.14227	-4.45071	[MF] sodium ion binding
GO:0008478	0.40278	0.29187	1.99626	0.0486476	0.14227	-4.45248	[MF] pyridoxal kinase activity
GO:0009443	0.40278	0.29187	1.99626	0.0486476	0.14227	-4.45248	[BP] pyridoxal 5'-phosphate salvage
GO:0016726	0.33594	0.16797	1.99591	0.0486865	0.14227	-4.45314	[MF] oxidoreductase activity, acting on CH or CH2 groups, NAD or NADP as acceptor
GO:0015128	0.15234	0.07617	1.99373	0.0489286	0.142692	-4.45724	[MF] gluconate transmembrane transporter activity
GO:0004824	0.265	0.1325	1.98736	0.0496409	0.144195	-4.46918	[MF] lysine-tRNA ligase activity
GO:0006430	0.265	0.1325	1.98736	0.0496409	0.144195	-4.46918	[BP] lysyl-tRNA aminoacylation
GO:0004594	0.32272	0.25412	1.98439	0.0499769	0.144796	-4.47475	[MF] pantothenate kinase activity
GO:0009372	0.55408	0.42696	1.98378	0.0500457	0.144796	-4.47589	[BP] quorum sensing
GO:0015658	0.52222	0.27783	1.98228	0.0502156	0.145001	-4.47869	[MF] branched-chain amino acid transmembrane transporter activity
GO:0004400	0.28598	0.16371	1.9791	0.0505778	0.14576	-4.48462	[MF] histidinol-phosphate transaminase activity
GO:0008867	0.10226	0.05113	1.97707	0.0508113	0.145858	-4.48842	[MF] galactarate dehydratase activity
GO:0046392	0.10226	0.05113	1.97707	0.0508113	0.145858	-4.48842	[BP] galactarate catabolic process
GO:0019284	0.151	0.0755	1.9721	0.0513846	0.146699	-4.49767	[BP] L-methionine biosynthetic process from S-adenosylmethionine
GO:0009432	0.99272	1.33724	1.97199	0.0513967	0.146699	-4.49786	[BP] SOS response
GO:0004355	0.11838	0.05919	1.97016	0.0516091	0.146699	-4.50126	[MF] glutamate synthase (NADPH) activity
GO:0009451	0.55582	0.54377	1.96998	0.0516309	0.146699	-4.50161	[BP] RNA modification
GO:0006777	0.27386	0.13693	1.96977	0.0516547	0.146699	-4.50199	[BP] Mo-molybdopterin cofactor biosynthetic process
GO:0043772	0.40598	0.50153	1.96934	0.0517054	0.146699	-4.5028	[MF] acyl-phosphate glycerol-3-phosphate acyltransferase activity
GO:0009081	-0.15836	0.12002	-1.96443	0.0522804	0.148043	-4.51191	[BP] branched-chain amino acid metabolic process
GO:0019829	0.23668	0.11834	1.96155	0.05262	0.148718	-4.51724	[MF] cation-transporting ATPase activity
GO:0004673	1.33882	1.27653	1.95779	0.0530655	0.149688	-4.52418	[MF] protein histidine kinase activity
GO:0016779	0.47514	0.31451	1.95578	0.0533057	0.150076	-4.52789	[MF] nucleotidyltransferase activity
GO:0015031	0.39556	0.43926	1.94913	0.0541053	0.152035	-4.54013	[BP] protein transport
GO:0046854	0.16	0.08	1.9401	0.0552092	0.15484	-4.55672	[BP] phosphatidylinositol phosphorylation
GO:0019509	0.40342	0.30341	1.93825	0.0554372	0.155182	-4.5601	[BP] L-methionine biosynthetic process from methylthioadenosine
GO:0003849	0.68338	0.86067	1.9365	0.0556536	0.15549	-4.5633	[MF] 3-deoxy-7-phosphoheptulonate synthase activity
GO:0008685	0.56152	0.46636	1.92995	0.0564712	0.15717	-4.57526	[MF] 2-C-methyl-D-erythritol 2,4-cyclodiphosphate synthase activity
GO:0004152	0.36976	0.55116	1.92934	0.0565481	0.15717	-4.57638	[MF] dihydroorotate dehydrogenase activity
GO:0006531	0.23968	0.11984	1.92911	0.0565769	0.15717	-4.57679	[BP] aspartate metabolic process
GO:0006741	0.41386	0.36267	1.91909	0.0578482	0.160094	-4.595	[BP] NADP biosynthetic process
GO:0019674	0.41386	0.36267	1.91909	0.0578482	0.160094	-4.595	[BP] NAD metabolic process
GO:0009186	0.80474	0.81645	1.91697	0.0581203	0.160544	-4.59884	[BP] deoxyribonucleoside diphosphate metabolic process
GO:0006094	1.81514	3.59959	1.91557	0.0583015	0.160741	-4.60138	[BP] gluconeogenesis
GO:0005996	0.0837	0.04185	1.90777	0.0593148	0.162693	-4.61547	[BP] monosaccharide metabolic process
GO:0016861	0.0837	0.04185	1.90777	0.0593148	0.162693	-4.61547	[MF] intramolecular oxidoreductase activity, interconverting aldoses and ketoses
GO:0004067	0.2172	0.1086	1.90755	0.0593429	0.162693	-4.61586	[MF] asparaginase activity
GO:0009267	0.07748	0.03874	1.90078	0.0602359	0.16442	-4.62806	[BP] cellular response to starvation
GO:0004148	0.19672	0.09836	1.90042	0.0602834	0.16442	-4.6287	[MF] dihydrolipoyl dehydrogenase activity
GO:0004518	0.3763	0.24387	1.90022	0.0603097	0.16442	-4.62906	[MF] nuclease activity
GO:0004412	0.28914	0.40459	1.89445	0.0610802	0.166211	-4.63942	[MF] homoserine dehydrogenase activity
GO:0052906	0.60358	0.67141	1.89016	0.0616568	0.167469	-4.64708	[MF] tRNA (guanine(37)-N(1))-methyltransferase activity
GO:0004073	0.24062	0.14249	1.88888	0.061831	0.167631	-4.64938	[MF] aspartate-semialdehyde dehydrogenase activity
GO:0009063	0.40164	0.20082	1.88689	0.0621006	0.16779	-4.65293	[BP] cellular amino acid catabolic process
GO:0004829	0.14452	0.10764	1.88592	0.0622336	0.16779	-4.65467	[MF] threonine-tRNA ligase activity
GO:0006435	0.14452	0.10764	1.88592	0.0622336	0.16779	-4.65467	[BP] threonyl-tRNA aminoacylation
GO:0004139	0.28038	0.14019	1.8798	0.0630719	0.169116	-4.66557	[MF] deoxyribose-phosphate aldolase activity
GO:0016052	0.28038	0.14019	1.8798	0.0630719	0.169116	-4.66557	[BP] carbohydrate catabolic process
GO:0046386	0.28038	0.14019	1.8798	0.0630719	0.169116	-4.66557	[BP] deoxyribose phosphate catabolic process
GO:0000302	0.14444	0.07222	1.86721	0.0648266	0.173187	-4.68789	[BP] response to reactive oxygen species
GO:0008785	0.14444	0.07222	1.86721	0.0648266	0.173187	-4.68789	[MF] alkyl hydroperoxide reductase activity
GO:0004750	0.21166	0.10583	1.86492	0.0651507	0.173735	-4.69194	[MF] ribulose-phosphate 3-epimerase activity
GO:0070043	0.33838	0.16919	1.85711	0.0662647	0.176385	-4.7057	[MF] rRNA (guanine-N7-)-methyltransferase activity
GO:0000150	0.07926	0.06159	1.85493	0.0665782	0.176898	-4.70953	[MF] recombinase activity
GO:0008113	0.26898	0.13449	1.85366	0.0667612	0.177062	-4.71176	[MF] peptide-methionine (S)-S-oxide reductase activity
GO:0015424	0.26526	0.19333	1.85132	0.0671006	0.177339	-4.71587	[MF] amino acid-transporting ATPase activity
GO:0009055	2.94954	2.19615	1.85127	0.0671078	0.177339	-4.71596	[MF] electron carrier activity
GO:0034228	0.14798	0.07399	1.84867	0.0674854	0.17771	-4.7205	[MF] ethanolamine transmembrane transporter activity
GO:0030288	0.62844	0.3672	1.84864	0.0674908	0.17771	-4.72057	[CC] outer membrane-bounded periplasmic space
GO:0002949	0.3548	0.1774	1.84515	0.0680003	0.178576	-4.72666	[BP] tRNA threonylcarbamoyladenosine modification
GO:0004847	0.65058	0.45951	1.84472	0.0680639	0.178576	-4.72742	[MF] urea carboxylase activity
GO:0004764	0.18572	0.12844	1.83903	0.0689041	0.180336	-4.73735	[MF] shikimate 3-dehydrogenase (NADP+) activity
GO:0018339	0.50524	0.51848	1.83851	0.068981	0.180336	-4.73825	[BP] peptidyl-L-beta-methylthioaspartic acid biosynthetic process from peptidyl-aspartic acid
GO:0008271	0.09368	0.04684	1.83503	0.0695	0.181369	-4.74432	[MF] secondary active sulfate transmembrane transporter activity
GO:0008782	0.3404	0.2719	1.83238	0.0698965	0.181433	-4.74892	[MF] adenosylhomocysteine nucleosidase activity
GO:0008930	0.3404	0.2719	1.83238	0.0698965	0.181433	-4.74892	[MF] methylthioadenosine nucleosidase activity
GO:0009164	0.3404	0.2719	1.83238	0.0698965	0.181433	-4.74892	[BP] nucleoside catabolic process
GO:0004747	0.35792	0.54744	1.83114	0.0700838	0.181598	-4.75108	[MF] ribokinase activity
GO:0030975	0.22534	0.11267	1.83009	0.0702418	0.181685	-4.7529	[MF] thiamine binding
GO:0004061	0.2448	0.1224	1.82831	0.07051	0.181737	-4.75598	[MF] arylformamidase activity
GO:0019441	0.2448	0.1224	1.82831	0.07051	0.181737	-4.75598	[BP] tryptophan catabolic process to kynurenine
GO:0022820	0.11532	0.05766	1.82722	0.0706748	0.181842	-4.75787	[MF] potassium ion symporter activity
GO:0004637	0.327	0.28574	1.80941	0.0734171	0.188566	-4.78857	[MF] phosphoribosylamine-glycine ligase activity
GO:0002161	0.23762	0.13127	1.80239	0.0745228	0.191071	-4.80061	[MF] aminoacyl-tRNA editing activity
GO:0004743	0.15636	0.07818	1.79949	0.0749835	0.191581	-4.80557	[MF] pyruvate kinase activity
GO:0030955	0.15636	0.07818	1.79949	0.0749835	0.191581	-4.80557	[MF] potassium ion binding
GO:0003937	0.34154	0.30281	1.79306	0.0760127	0.193009	-4.81653	[MF] IMP cyclohydrolase activity
GO:0030259	0.2855	0.29395	1.79233	0.0761309	0.193009	-4.81777	[BP] lipid glycosylation
GO:0050511	0.2855	0.29395	1.79233	0.0761309	0.193009	-4.81777	[MF] undecaprenyldiphospho-muramoylpentapeptide beta-N-acetylglucosaminyltransferase activity
GO:0051991	0.2855	0.29395	1.79233	0.0761309	0.193009	-4.81777	[MF] UDP-N-acetyl-D-glucosamine:N-acetylmuramoyl-L-alanyl-D-glutamyl-meso-2,6-diaminopimelyl-D-alanyl-D-alanine-diphosphoundecaprenol 4-beta-N-acetylglucosaminlytransferase activity
GO:0008276	0.21616	0.10808	1.79189	0.0762015	0.193009	-4.81852	[MF] protein methyltransferase activity
GO:0016151	0.54574	0.49835	1.79096	0.0763515	0.193055	-4.8201	[MF] nickel cation binding
GO:0015574	0.18038	0.09019	1.78606	0.0771469	0.194729	-4.82842	[MF] trehalose transmembrane transporter activity
GO:0003684	0.37832	0.44602	1.78458	0.0773888	0.194805	-4.83093	[MF] damaged DNA binding
GO:0030001	0.5114	0.83314	1.78425	0.077443	0.194805	-4.83149	[BP] metal ion transport
GO:0000453	0.20272	0.1239	1.78248	0.0777314	0.194861	-4.83448	[BP] enzyme-directed rRNA 2'-O-methylation
GO:0070677	0.20272	0.1239	1.78248	0.0777314	0.194861	-4.83448	[MF] rRNA (cytosine-2'-O-)-methyltransferase activity
GO:0045261	1.06206	1.96605	1.78132	0.0779224	0.195006	-4.83645	[CC] proton-transporting ATP synthase complex, catalytic core F(1)
GO:0000036	0.74096	0.37048	1.77803	0.0784645	0.196027	-4.842	[MF] ACP phosphopantetheine attachment site binding involved in fatty acid biosynthetic process
GO:0004853	0.20724	0.10362	1.77541	0.0788985	0.196581	-4.84643	[MF] uroporphyrinogen decarboxylase activity
GO:0004654	0.28512	0.14256	1.77507	0.0789548	0.196581	-4.847	[MF] polyribonucleotide nucleotidyltransferase activity
GO:0004459	0.64746	1.13957	1.77029	0.0797534	0.198233	-4.85506	[MF] L-lactate dehydrogenase activity
GO:0052657	0.26774	0.13387	1.76626	0.0804296	0.198694	-4.86181	[MF] guanine phosphoribosyltransferase activity
GO:0008253	0.2953	0.14765	1.76597	0.0804797	0.198694	-4.86231	[MF] 5'-nucleotidase activity
GO:0015655	0.13812	0.06906	1.76582	0.0805051	0.198694	-4.86256	[MF] alanine:sodium symporter activity
GO:0003747	0.13572	0.06786	1.76554	0.080551	0.198694	-4.86302	[MF] translation release factor activity
GO:0009039	-0.3255	0.16275	-1.76435	0.0807534	0.198694	-4.86503	[MF] urease activity
GO:0043419	-0.3255	0.16275	-1.76435	0.0807534	0.198694	-4.86503	[BP] urea catabolic process
GO:0008137	0.47988	0.23994	1.76321	0.0809465	0.198711	-4.86694	[MF] NADH dehydrogenase (ubiquinone) activity
GO:0009225	0.2292	0.1146	1.76271	0.0810316	0.198711	-4.86778	[BP] nucleotide-sugar metabolic process
GO:0071111	-0.32192	0.16096	-1.76129	0.0812726	0.198968	-4.87015	[MF] cyclic-guanylate-specific phosphodiesterase activity
GO:0008800	0.33486	0.16743	1.75941	0.0815936	0.199088	-4.8733	[MF] beta-lactamase activity
GO:0030655	0.33486	0.16743	1.75941	0.0815936	0.199088	-4.8733	[BP] beta-lactam antibiotic catabolic process
GO:0015612	0.26028	0.13014	1.7566	0.0820733	0.199594	-4.87799	[MF] L-arabinose-importing ATPase activity
GO:0042882	0.26028	0.13014	1.7566	0.0820733	0.199594	-4.87799	[BP] L-arabinose transport
GO:0004844	0.41834	0.30185	1.75469	0.0824024	0.199838	-4.88118	[MF] uracil DNA N-glycosylase activity
GO:0004069	0.15458	0.07729	1.75443	0.0824466	0.199838	-4.88161	[MF] L-aspartate:2-oxoglutarate aminotransferase activity
GO:0022904	0.11116	0.05558	1.75157	0.0829399	0.200701	-4.88637	[BP] respiratory electron transport chain
GO:0070814	0.27072	0.13536	1.74888	0.0834075	0.201499	-4.89086	[BP] hydrogen sulfide biosynthetic process
GO:0003974	0.35594	0.17797	1.74335	0.0843724	0.202572	-4.90003	[MF] UDP-N-acetylglucosamine 4-epimerase activity
GO:0008966	0.1315	0.06575	1.74235	0.0845487	0.202572	-4.9017	[MF] phosphoglucosamine mutase activity
GO:0006401	0.74032	0.70166	1.7422	0.0845755	0.202572	-4.90195	[BP] RNA catabolic process
GO:0004831	0.3872	0.32704	1.74165	0.0846707	0.202572	-4.90285	[MF] tyrosine-tRNA ligase activity
GO:0006437	0.3872	0.32704	1.74165	0.0846707	0.202572	-4.90285	[BP] tyrosyl-tRNA aminoacylation
GO:0015081	0.0866	0.0433	1.74081	0.0848201	0.202572	-4.90425	[MF] sodium ion transmembrane transporter activity
GO:0071436	0.0866	0.0433	1.74081	0.0848201	0.202572	-4.90425	[BP] sodium ion export
GO:0016310	0.3895	0.19475	1.7385	0.0852267	0.203211	-4.90806	[BP] phosphorylation
GO:0008968	0.2697	0.13485	1.73599	0.0856728	0.203612	-4.91222	[MF] D-sedoheptulose 7-phosphate isomerase activity
GO:2001061	0.2697	0.13485	1.73599	0.0856728	0.203612	-4.91222	[BP] D-glycero-D-manno-heptose 7-phosphate biosynthetic process
GO:0006807	0.66482	0.63479	1.73381	0.086061	0.204203	-4.91581	[BP] nitrogen compound metabolic process
GO:0016757	0.46074	0.48727	1.73095	0.0865719	0.205083	-4.92052	[MF] transferase activity, transferring glycosyl groups
GO:0004385	0.56314	0.70833	1.72918	0.0868887	0.205501	-4.92343	[MF] guanylate kinase activity
GO:0009331	0.4939	0.74307	1.72225	0.0881434	0.208132	-4.93482	[CC] glycerol-3-phosphate dehydrogenase complex
GO:0061711	0.21292	0.10646	1.71567	0.0893459	0.210632	-4.94558	[MF] N(6)-L-threonylcarbamoyladenine synthase
GO:0004018	0.2603	0.13015	1.7069	0.0909711	0.21297	-4.95987	[MF] N6-(1,2-dicarboxyethyl)AMP AMP-lyase (fumarate-forming) activity
GO:0070626	0.2603	0.13015	1.7069	0.0909711	0.21297	-4.95987	[MF] (S)-2-(5-amino-1-(5-phospho-D-ribosyl)imidazole-4-carboxamido)succinate AMP-lyase (fumarate-forming) activity
GO:0016437	0.05676	0.02838	1.70688	0.0909742	0.21297	-4.95989	[MF] tRNA cytidylyltransferase activity
GO:0042245	0.05676	0.02838	1.70688	0.0909742	0.21297	-4.95989	[BP] RNA repair
GO:0033862	0.2614	0.16408	1.70594	0.0911499	0.21297	-4.96142	[MF] UMP kinase activity
GO:0008961	0.14816	0.07408	1.70484	0.091356	0.21297	-4.96321	[MF] phosphatidylglycerol-prolipoprotein diacylglyceryl transferase activity
GO:0042158	0.14816	0.07408	1.70484	0.091356	0.21297	-4.96321	[BP] lipoprotein biosynthetic process
GO:0009847	0.2566	0.1283	1.70269	0.0917604	0.213335	-4.96671	[BP] spore germination
GO:0008734	0.0546	0.0273	1.70146	0.0919919	0.213335	-4.9687	[MF] L-aspartate oxidase activity
GO:0044318	0.0546	0.0273	1.70146	0.0919919	0.213335	-4.9687	[MF] L-aspartate:fumarate oxidoreductase activity
GO:0006655	0.17394	0.08697	1.70091	0.0920955	0.213335	-4.96959	[BP] phosphatidylglycerol biosynthetic process
GO:0043896	0.12312	0.06156	1.69825	0.0925973	0.214159	-4.97389	[MF] glucan 1,6-alpha-glucosidase activity
GO:0008677	0.13106	0.06553	1.6951	0.0931949	0.215201	-4.97898	[MF] 2-dehydropantoate 2-reductase activity
GO:0047553	0.50648	0.25324	1.69248	0.0936941	0.216013	-4.9832	[MF] 2-oxoglutarate synthase activity
GO:0008881	0.33984	0.16992	1.69021	0.0941306	0.216678	-4.98687	[MF] glutamate racemase activity
GO:0004048	0.2199	0.10995	1.68355	0.0954153	0.21929	-4.99757	[MF] anthranilate phosphoribosyltransferase activity
GO:0008643	0.07442	0.03721	1.68059	0.0959904	0.22021	-5.00231	[BP] carbohydrate transport
GO:0015137	0.08674	0.04337	1.67925	0.0962533	0.22021	-5.00447	[MF] citrate transmembrane transporter activity
GO:0004020	0.23678	0.11839	1.67859	0.0963808	0.22021	-5.00551	[MF] adenylylsulfate kinase activity
GO:0046677	0.67422	1.09669	1.67809	0.0964787	0.22021	-5.00631	[BP] response to antibiotic
GO:0030436	0.30716	0.38382	1.67746	0.0966033	0.22021	-5.00733	[BP] asexual sporulation
GO:0051191	0.04704	0.02352	1.67687	0.0967177	0.22021	-5.00826	[BP] prosthetic group biosynthetic process
GO:0061603	0.18586	0.09293	1.67349	0.0973838	0.221382	-5.01367	[MF] molybdenum cofactor guanylyltransferase activity
GO:0004783	0.54596	0.53878	1.67158	0.0977598	0.221892	-5.0167	[MF] sulfite reductase (NADPH) activity
GO:0015415	0.36526	0.36553	1.66919	0.0982337	0.222623	-5.02051	[MF] phosphate ion transmembrane-transporting ATPase activity
GO:0046523	0.11424	0.05712	1.66701	0.0986695	0.223264	-5.02399	[MF] S-methyl-5-thioribose-1-phosphate isomerase activity
GO:0004633	0.20518	0.10259	1.66476	0.0991185	0.223934	-5.02756	[MF] phosphopantothenoylcysteine decarboxylase activity
GO:0046110	0.55694	0.54075	1.66175	0.0997216	0.22495	-5.03233	[BP] xanthine metabolic process
GO:0050308	-0.47566	0.32331	-1.65885	0.100306	0.225374	-5.03692	[MF] sugar-phosphatase activity
GO:0008878	0.8528	0.99054	1.65849	0.10038	0.225374	-5.03749	[MF] glucose-1-phosphate adenylyltransferase activity
GO:0042781	0.10062	0.05031	1.65814	0.100449	0.225374	-5.03804	[MF] 3'-tRNA processing endoribonuclease activity
GO:0045982	0.11982	0.05991	1.6564	0.100802	0.225374	-5.04079	[BP] negative regulation of purine nucleobase metabolic process
GO:0004609	0.2352	0.1176	1.65594	0.100896	0.225374	-5.04152	[MF] phosphatidylserine decarboxylase activity
GO:0006646	0.2352	0.1176	1.65594	0.100896	0.225374	-5.04152	[BP] phosphatidylethanolamine biosynthetic process
GO:0008909	0.0902	0.0451	1.65549	0.100987	0.225374	-5.04223	[MF] isochorismate synthase activity
GO:0016835	0.10206	0.05103	1.65196	0.101707	0.225893	-5.0478	[MF] carbon-oxygen lyase activity
GO:0097173	0.10206	0.05103	1.65196	0.101707	0.225893	-5.0478	[BP] N-acetylmuramic acid catabolic process
GO:0005328	0.15786	0.07893	1.65159	0.101782	0.225893	-5.04838	[MF] neurotransmitter:sodium symporter activity
GO:0009103	0.198	0.099	1.65022	0.102062	0.225893	-5.05054	[BP] lipopolysaccharide biosynthetic process
GO:0016836	0.6117	0.82867	1.64994	0.102119	0.225893	-5.05097	[MF] hydro-lyase activity
GO:0033743	0.14152	0.07076	1.649	0.102313	0.225893	-5.05246	[MF] peptide-methionine (R)-S-oxide reductase activity
GO:0016868	0.04156	0.02078	1.64872	0.102371	0.225893	-5.05291	[MF] intramolecular transferase activity, phosphotransferases
GO:0004799	0.70882	1.29033	1.64831	0.102454	0.225893	-5.05354	[MF] thymidylate synthase activity
GO:0003848	0.18832	0.09416	1.64506	0.103125	0.226716	-5.05866	[MF] 2-amino-4-hydroxy-6-hydroxymethyldihydropteridine diphosphokinase activity
GO:0006650	0.46592	0.72908	1.645	0.103137	0.226716	-5.05874	[BP] glycerophospholipid metabolic process
GO:0016311	0.52978	0.80245	1.6428	0.103593	0.227122	-5.0622	[BP] dephosphorylation
GO:0015418	0.17082	0.08541	1.64177	0.103805	0.227122	-5.0638	[MF] quaternary-ammonium-compound-transporting ATPase activity
GO:0004335	0.07814	0.03907	1.63878	0.10443	0.227122	-5.0685	[MF] galactokinase activity
GO:0019354	0.23864	0.11932	1.63681	0.10484	0.227122	-5.07156	[BP] siroheme biosynthetic process
GO:0031460	0.07546	0.03773	1.63621	0.104966	0.227122	-5.07251	[BP] glycine betaine transport
GO:0004367	0.45808	0.72516	1.63402	0.105425	0.227122	-5.07592	[MF] glycerol-3-phosphate dehydrogenase [NAD+] activity
GO:0008888	0.14798	0.07399	1.63311	0.105617	0.227122	-5.07734	[MF] glycerol dehydrogenase [NAD+] activity
GO:0006097	0.13552	0.06776	1.63144	0.10597	0.227122	-5.07994	[BP] glyoxylate cycle
GO:0070006	0.35186	0.27337	1.63087	0.106091	0.227122	-5.08084	[MF] metalloaminopeptidase activity
GO:0070084	0.35186	0.27337	1.63087	0.106091	0.227122	-5.08084	[BP] protein initiator methionine removal
GO:0043768	0.41306	0.35645	1.62736	0.106835	0.227122	-5.08629	[MF] S-ribosylhomocysteine lyase activity
GO:0003999	0.4338	0.52766	1.62734	0.10684	0.227122	-5.08633	[MF] adenine phosphoribosyltransferase activity
GO:0006168	0.4338	0.52766	1.62734	0.10684	0.227122	-5.08633	[BP] adenine salvage
GO:0044209	0.4338	0.52766	1.62734	0.10684	0.227122	-5.08633	[BP] AMP salvage
GO:0004645	0.06898	0.03449	1.62639	0.107042	0.227122	-5.0878	[MF] phosphorylase activity
GO:0006206	0.06898	0.03449	1.62639	0.107042	0.227122	-5.0878	[BP] pyrimidine nucleobase metabolic process
GO:0006213	0.06898	0.03449	1.62639	0.107042	0.227122	-5.0878	[BP] pyrimidine nucleoside metabolic process
GO:0016154	0.06898	0.03449	1.62639	0.107042	0.227122	-5.0878	[MF] pyrimidine-nucleoside phosphorylase activity
GO:0004362	0.06662	0.03331	1.62576	0.107175	0.227122	-5.08877	[MF] glutathione-disulfide reductase activity
GO:0006749	0.06662	0.03331	1.62576	0.107175	0.227122	-5.08877	[BP] glutathione metabolic process
GO:0004575	0.10846	0.05423	1.62573	0.107183	0.227122	-5.08883	[MF] sucrose alpha-glucosidase activity
GO:0005985	0.10846	0.05423	1.62573	0.107183	0.227122	-5.08883	[BP] sucrose metabolic process
GO:0004424	0.31226	0.23613	1.62524	0.107286	0.227122	-5.08958	[MF] imidazoleglycerol-phosphate dehydratase activity
GO:0070204	0.1645	0.08225	1.62517	0.107302	0.227122	-5.08969	[MF] 2-succinyl-5-enolpyruvyl-6-hydroxy-3-cyclohexene-1-carboxylic-acid synthase activity
GO:0016668	0.06514	0.03257	1.62479	0.107383	0.227122	-5.09028	[MF] oxidoreductase activity, acting on a sulfur group of donors, NAD(P) as acceptor
GO:0006534	0.11196	0.05598	1.62419	0.10751	0.227122	-5.09121	[BP] cysteine metabolic process
GO:0031071	0.11196	0.05598	1.62419	0.10751	0.227122	-5.09121	[MF] cysteine desulfurase activity
GO:0018364	0.28948	0.14474	1.61964	0.108486	0.228451	-5.09825	[BP] peptidyl-glutamine methylation
GO:0036009	0.28948	0.14474	1.61964	0.108486	0.228451	-5.09825	[MF] protein-glutamine N-methyltransferase activity
GO:0015103	-0.43382	0.35579	-1.61908	0.108608	0.228451	-5.09913	[MF] inorganic anion transmembrane transporter activity
GO:0019538	0.09152	0.04576	1.61779	0.108886	0.228707	-5.10112	[BP] protein metabolic process
GO:0008940	-0.43824	0.3449	-1.61465	0.109566	0.229567	-5.10597	[MF] nitrate reductase activity
GO:0016820	0.604	0.36266	1.61445	0.109609	0.229567	-5.10628	[MF] hydrolase activity, acting on acid anhydrides, catalyzing transmembrane movement of substances
GO:0004560	0.2614	0.1307	1.61102	0.110354	0.230674	-5.11155	[MF] alpha-L-fucosidase activity
GO:0009236	0.58746	0.77287	1.60957	0.110671	0.230674	-5.11378	[BP] cobalamin biosynthetic process
GO:0008446	0.17542	0.08771	1.60913	0.110767	0.230674	-5.11446	[MF] GDP-mannose 4,6-dehydratase activity
GO:0019673	0.17542	0.08771	1.60913	0.110767	0.230674	-5.11446	[BP] GDP-mannose metabolic process
GO:0036439	0.4335	0.71287	1.59077	0.114845	0.238092	-5.14253	[MF] glycerol-3-phosphate dehydrogenase [NADP+] activity
GO:0047952	0.4335	0.71287	1.59077	0.114845	0.238092	-5.14253	[MF] glycerol-3-phosphate dehydrogenase [NAD(P)+] activity
GO:0006808	0.05292	0.02646	1.59017	0.11498	0.238092	-5.14344	[BP] regulation of nitrogen utilization
GO:0030234	0.05292	0.02646	1.59017	0.11498	0.238092	-5.14344	[MF] enzyme regulator activity
GO:0004471	0.1794	0.0897	1.58709	0.115676	0.238857	-5.14812	[MF] malate dehydrogenase (decarboxylating) (NAD+) activity
GO:0006108	0.1794	0.0897	1.58709	0.115676	0.238857	-5.14812	[BP] malate metabolic process
GO:0005971	0.16062	0.08031	1.58419	0.116336	0.239545	-5.15252	[CC] ribonucleoside-diphosphate reductase complex
GO:0009263	0.16062	0.08031	1.58419	0.116336	0.239545	-5.15252	[BP] deoxyribonucleotide biosynthetic process
GO:0009381	0.15188	0.07594	1.5831	0.116584	0.23966	-5.15417	[MF] excinuclease ABC activity
GO:0003796	1.01966	2.19545	1.5825	0.11672	0.23966	-5.15507	[MF] lysozyme activity
GO:0047451	0.47414	0.58837	1.5786	0.117614	0.241157	-5.16097	[MF] 3-hydroxyoctanoyl-[acyl-carrier-protein] dehydratase activity
GO:0006464	0.33524	0.26972	1.57418	0.118632	0.242555	-5.16763	[BP] cellular protein modification process
GO:0019262	0.16802	0.08401	1.57408	0.118655	0.242555	-5.16778	[BP] N-acetylneuraminate catabolic process
GO:0046167	0.26448	0.49184	1.57349	0.118792	0.242555	-5.16867	[BP] glycerol-3-phosphate biosynthetic process
GO:0004574	0.2898	0.1449	1.56899	0.119836	0.244237	-5.17543	[MF] oligo-1,6-glucosidase activity
GO:0009234	0.49774	0.24887	1.5685	0.11995	0.244237	-5.17616	[BP] menaquinone biosynthetic process
GO:0016833	0.17922	0.08961	1.56237	0.121386	0.246819	-5.18534	[MF] oxo-acid-lyase activity
GO:0004197	0.03428	0.01714	1.55931	0.122111	0.247345	-5.18992	[MF] cysteine-type endopeptidase activity
GO:0004044	0.29626	0.56819	1.55921	0.122133	0.247345	-5.19006	[MF] amidophosphoribosyltransferase activity
GO:0046961	0.64836	1.17468	1.55913	0.122152	0.247345	-5.19018	[MF] proton-transporting ATPase activity, rotational mechanism
GO:0006564	0.46664	0.62582	1.55068	0.124165	0.250833	-5.20276	[BP] L-serine biosynthetic process
GO:0003968	0.035	0.0175	1.54946	0.124458	0.250833	-5.20457	[MF] RNA-directed RNA polymerase activity
GO:0039694	0.035	0.0175	1.54946	0.124458	0.250833	-5.20457	[BP] viral RNA genome replication
GO:0004648	0.36736	0.57618	1.54904	0.12456	0.250833	-5.2052	[MF] O-phospho-L-serine:2-oxoglutarate aminotransferase activity
GO:0004181	0.10386	0.05193	1.5427	0.126089	0.253563	-5.21456	[MF] metallocarboxypeptidase activity
GO:0042026	0.12166	0.06083	1.5406	0.1266	0.254243	-5.21767	[BP] protein refolding
GO:0004819	0.1815	0.09075	1.53721	0.127427	0.255203	-5.22266	[MF] glutamine-tRNA ligase activity
GO:0006425	0.1815	0.09075	1.53721	0.127427	0.255203	-5.22266	[BP] glutaminyl-tRNA aminoacylation
GO:0003949	0.24168	0.17864	1.53649	0.127603	0.255206	-5.22372	[MF] 1-(5-phosphoribosyl)-5-[(5-phosphoribosylamino)methylideneamino]imidazole-4-carboxamide isomerase activity
GO:0009758	0.03574	0.01787	1.53123	0.128898	0.257094	-5.23145	[BP] carbohydrate utilization
GO:0050053	0.03574	0.01787	1.53123	0.128898	0.257094	-5.23145	[MF] levansucrase activity
GO:0047343	0.15922	0.07961	1.53009	0.12918	0.257306	-5.23313	[MF] glucose-1-phosphate cytidylyltransferase activity
GO:0004418	0.3065	0.24345	1.52777	0.129754	0.258097	-5.23652	[MF] hydroxymethylbilane synthase activity
GO:0004478	-0.598	0.39072	-1.52008	0.131674	0.261208	-5.24775	[MF] methionine adenosyltransferase activity
GO:0006556	-0.598	0.39072	-1.52008	0.131674	0.261208	-5.24775	[BP] S-adenosylmethionine biosynthetic process
GO:0004590	0.32236	0.5843	1.51871	0.132019	0.261537	-5.24974	[MF] orotidine-5'-phosphate decarboxylase activity
GO:0042274	0.28104	0.27516	1.51398	0.133211	0.263543	-5.2566	[BP] ribosomal small subunit biogenesis
GO:0003861	0.30266	0.15133	1.51304	0.133452	0.263662	-5.25798	[MF] 3-isopropylmalate dehydratase activity
GO:0004489	0.266	0.1597	1.50409	0.135738	0.267818	-5.27091	[MF] methylenetetrahydrofolate reductase (NAD(P)H) activity
GO:0004349	0.57174	0.65565	1.50006	0.136776	0.269502	-5.27671	[MF] glutamate 5-kinase activity
GO:0009378	0.54244	0.8378	1.49652	0.137695	0.270949	-5.2818	[MF] four-way junction helicase activity
GO:0004641	-0.15084	0.14338	-1.49066	0.139225	0.273591	-5.29018	[MF] phosphoribosylformylglycinamidine cyclo-ligase activity
GO:0004722	0.24112	0.22244	1.48501	0.140714	0.276147	-5.29825	[MF] protein serine/threonine phosphatase activity
GO:0006308	1.15024	2.64742	1.4768	0.142898	0.279309	-5.3099	[BP] DNA catabolic process
GO:0008855	1.15024	2.64742	1.4768	0.142898	0.279309	-5.3099	[MF] exodeoxyribonuclease VII activity
GO:0009318	1.15024	2.64742	1.4768	0.142898	0.279309	-5.3099	[CC] exodeoxyribonuclease VII complex
GO:0004818	0.14398	0.08671	1.47524	0.143318	0.279384	-5.31212	[MF] glutamate-tRNA ligase activity
GO:0006424	0.14398	0.08671	1.47524	0.143318	0.279384	-5.31212	[BP] glutamyl-tRNA aminoacylation
GO:0009380	0.09762	0.04881	1.47139	0.144353	0.281028	-5.31756	[CC] excinuclease repair complex
GO:0004826	0.3472	0.2963	1.45754	0.148127	0.287993	-5.33702	[MF] phenylalanine-tRNA ligase activity
GO:0006813	0.21962	0.25821	1.45321	0.149325	0.289936	-5.34307	[BP] potassium ion transport
GO:0003978	0.38876	0.46408	1.44146	0.152606	0.291673	-5.3594	[MF] UDP-glucose 4-epimerase activity
GO:0018144	0.01732	0.00866	1.43771	0.153665	0.291673	-5.36458	[BP] RNA-protein covalent cross-linking
GO:0004592	0.23828	0.11914	1.43487	0.154472	0.291673	-5.3685	[MF] pantoate-beta-alanine ligase activity
GO:0004619	0.22536	0.11268	1.4346	0.154549	0.291673	-5.36887	[MF] phosphoglycerate mutase activity
GO:0015668	0.20512	0.10256	1.43408	0.154697	0.291673	-5.36959	[MF] Type III site-specific deoxyribonuclease activity
GO:0008556	0.2017	0.10085	1.43393	0.15474	0.291673	-5.3698	[MF] potassium-transporting ATPase activity
GO:0006307	0.19336	0.09668	1.43369	0.154807	0.291673	-5.37012	[BP] DNA dealkylation involved in DNA repair
GO:0006282	0.19108	0.09554	1.43361	0.15483	0.291673	-5.37023	[BP] regulation of DNA repair
GO:0019478	0.37316	0.38314	1.43355	0.154846	0.291673	-5.37031	[BP] D-amino acid catabolic process
GO:0004176	0.1788	0.0894	1.4331	0.154974	0.291673	-5.37093	[MF] ATP-dependent peptidase activity
GO:0004145	0.17768	0.08884	1.43306	0.154988	0.291673	-5.371	[MF] diamine N-acetyltransferase activity
GO:0033735	0.17058	0.08529	1.43271	0.155088	0.291673	-5.37148	[MF] aspartate dehydrogenase activity
GO:0008853	0.16886	0.08443	1.4325	0.155145	0.291673	-5.37175	[MF] exodeoxyribonuclease III activity
GO:0008818	0.16678	0.08339	1.4323	0.155204	0.291673	-5.37204	[MF] cobalamin 5'-phosphate synthase activity
GO:0051073	0.16678	0.08339	1.4323	0.155204	0.291673	-5.37204	[MF] adenosylcobinamide-GDP ribazoletransferase activity
GO:0052861	0.15764	0.07882	1.43195	0.155303	0.291673	-5.37252	[MF] glucan endo-1,3-beta-glucanase activity, C-3 substituted reducing group
GO:0052862	0.15764	0.07882	1.43195	0.155303	0.291673	-5.37252	[MF] glucan endo-1,4-beta-glucanase activity, C-3 substituted reducing group
GO:0032324	0.17822	0.08911	1.43158	0.155409	0.291673	-5.37303	[BP] molybdopterin cofactor biosynthetic process
GO:0019299	0.28212	0.14106	1.43144	0.155449	0.291673	-5.37322	[BP] rhamnose metabolic process
GO:0046537	0.16818	0.08409	1.43123	0.155508	0.291673	-5.3735	[MF] 2,3-bisphosphoglycerate-independent phosphoglycerate mutase activity
GO:0008935	0.3125	0.15625	1.42991	0.155886	0.291673	-5.37532	[MF] 1,4-dihydroxy-2-naphthoyl-CoA synthase activity
GO:0016655	0.18894	0.09447	1.42871	0.156232	0.291673	-5.37697	[MF] oxidoreductase activity, acting on NAD(P)H, quinone or similar compound as acceptor
GO:0006306	0.1786	0.0893	1.42818	0.156383	0.291673	-5.3777	[BP] DNA methylation
GO:0008170	0.1786	0.0893	1.42818	0.156383	0.291673	-5.3777	[MF] N-methyltransferase activity
GO:0033739	0.19798	0.09899	1.42718	0.15667	0.291673	-5.37907	[MF] preQ1 synthase activity
GO:0046857	0.19798	0.09899	1.42718	0.15667	0.291673	-5.37907	[MF] oxidoreductase activity, acting on other nitrogenous compounds as donors, with NAD or NADP as acceptor
GO:0009117	0.11288	0.05644	1.42706	0.156704	0.291673	-5.37923	[BP] nucleotide metabolic process
GO:0047761	0.17372	0.08686	1.42637	0.156904	0.291673	-5.38018	[MF] butyrate kinase activity
GO:0003857	0.16658	0.08329	1.42565	0.157109	0.291673	-5.38116	[MF] 3-hydroxyacyl-CoA dehydrogenase activity
GO:0006631	0.16658	0.08329	1.42565	0.157109	0.291673	-5.38116	[BP] fatty acid metabolic process
GO:0004797	0.16636	0.08318	1.4247	0.157385	0.291673	-5.38247	[MF] thymidine kinase activity
GO:0071897	0.16636	0.08318	1.4247	0.157385	0.291673	-5.38247	[BP] DNA biosynthetic process
GO:0006354	0.10114	0.05057	1.4246	0.157412	0.291673	-5.38259	[BP] DNA-templated transcription, elongation
GO:0046558	0.19308	0.09654	1.42457	0.157421	0.291673	-5.38264	[MF] arabinan endo-1,5-alpha-L-arabinosidase activity
GO:0061710	0.17756	0.08878	1.42398	0.157591	0.291673	-5.38344	[MF] L-threonylcarbamoyladenylate synthase
GO:0004825	0.18212	0.09106	1.42326	0.1578	0.291673	-5.38443	[MF] methionine-tRNA ligase activity
GO:0006431	0.18212	0.09106	1.42326	0.1578	0.291673	-5.38443	[BP] methionyl-tRNA aminoacylation
GO:0004365	0.0928	0.0464	1.4223	0.158079	0.291673	-5.38575	[MF] glyceraldehyde-3-phosphate dehydrogenase (NAD+) (phosphorylating) activity
GO:0008742	0.29288	0.14644	1.41948	0.158897	0.291673	-5.3896	[MF] L-ribulose-phosphate 4-epimerase activity
GO:0019572	0.29288	0.14644	1.41948	0.158897	0.291673	-5.3896	[BP] L-arabinose catabolic process
GO:0050797	0.19088	0.09544	1.41901	0.159034	0.291673	-5.39024	[MF] thymidylate synthase (FAD) activity
GO:0044237	0.08368	0.04184	1.41895	0.159051	0.291673	-5.39033	[BP] cellular metabolic process
GO:0016852	0.18382	0.09191	1.41845	0.159195	0.291673	-5.391	[MF] sirohydrochlorin cobaltochelatase activity
GO:0019251	0.18382	0.09191	1.41845	0.159195	0.291673	-5.391	[BP] anaerobic cobalamin biosynthetic process
GO:0003864	0.18016	0.09008	1.41814	0.159286	0.291673	-5.39143	[MF] 3-methyl-2-oxobutanoate hydroxymethyltransferase activity
GO:0051775	0.08112	0.04056	1.4178	0.159384	0.291673	-5.39188	[BP] response to redox state
GO:0048038	0.35532	0.17766	1.41615	0.159865	0.292188	-5.39413	[MF] quinone binding
GO:0008171	0.07686	0.03843	1.41489	0.160234	0.292498	-5.39585	[MF] O-methyltransferase activity
GO:0006040	0.07232	0.03616	1.41293	0.160808	0.29296	-5.39851	[BP] amino sugar metabolic process
GO:0006004	0.1198	0.0599	1.41266	0.160888	0.29296	-5.39888	[BP] fucose metabolic process
GO:0004008	0.07282	0.03641	1.41186	0.161121	0.29302	-5.39996	[MF] copper-exporting ATPase activity
GO:0004351	0.19808	0.09904	1.41012	0.161634	0.293224	-5.40232	[MF] glutamate decarboxylase activity
GO:0006536	0.19808	0.09904	1.41012	0.161634	0.293224	-5.40232	[BP] glutamate metabolic process
GO:0005351	0.13842	0.07957	1.40601	0.162848	0.295061	-5.40789	[MF] sugar:proton symporter activity
GO:0016117	0.0596	0.0298	1.4019	0.164067	0.296243	-5.41343	[BP] carotenoid biosynthetic process
GO:0018160	0.28018	0.23029	1.40166	0.164139	0.296243	-5.41375	[BP] peptidyl-pyrromethane cofactor linkage
GO:0009295	0.3453	0.45015	1.40115	0.16429	0.296243	-5.41443	[CC] nucleoid
GO:0008910	-0.13396	0.06698	-1.40109	0.16431	0.296243	-5.41452	[MF] kanamycin kinase activity
GO:0043807	0.10672	0.05336	1.39746	0.165394	0.29783	-5.4194	[MF] 3-methyl-2-oxobutanoate dehydrogenase (ferredoxin) activity
GO:0004416	0.05436	0.02718	1.39509	0.166106	0.29838	-5.42259	[MF] hydroxyacylglutathione hydrolase activity
GO:0019243	0.05436	0.02718	1.39509	0.166106	0.29838	-5.42259	[BP] methylglyoxal catabolic process to D-lactate via S-lactoyl-glutathione
GO:0004072	0.19626	0.16259	1.3908	0.167399	0.298689	-5.42833	[MF] aspartate kinase activity
GO:0006090	0.12226	0.06113	1.39009	0.167615	0.298689	-5.42928	[BP] pyruvate metabolic process
GO:0006212	0.14528	0.07264	1.38971	0.167729	0.298689	-5.42979	[BP] uracil catabolic process
GO:0008752	0.14528	0.07264	1.38971	0.167729	0.298689	-5.42979	[MF] FMN reductase activity
GO:0019740	0.14528	0.07264	1.38971	0.167729	0.298689	-5.42979	[BP] nitrogen utilization
GO:0042602	0.14528	0.07264	1.38971	0.167729	0.298689	-5.42979	[MF] riboflavin reductase (NADPH) activity
GO:0008661	0.17782	0.11239	1.38911	0.16791	0.298689	-5.43059	[MF] 1-deoxy-D-xylulose-5-phosphate synthase activity
GO:0052865	0.17782	0.11239	1.38911	0.16791	0.298689	-5.43059	[BP] 1-deoxy-D-xylulose 5-phosphate biosynthetic process
GO:2001059	0.04818	0.02409	1.38423	0.169395	0.299977	-5.4371	[BP] D-tagatose 6-phosphate catabolic process
GO:0008927	0.04808	0.02404	1.38403	0.169458	0.299977	-5.43737	[MF] mannonate dehydratase activity
GO:0008879	0.15012	0.07506	1.3836	0.169588	0.299977	-5.43793	[MF] glucose-1-phosphate thymidylyltransferase activity
GO:0045226	0.15012	0.07506	1.3836	0.169588	0.299977	-5.43793	[BP] extracellular polysaccharide biosynthetic process
GO:0002098	0.0903	0.04515	1.38337	0.169659	0.299977	-5.43825	[BP] tRNA wobble uridine modification
GO:0009231	0.67552	0.96306	1.38186	0.17012	0.300076	-5.44025	[BP] riboflavin biosynthetic process
GO:0008810	0.05024	0.02512	1.38184	0.170125	0.300076	-5.44027	[MF] cellulase activity
GO:0015649	0.04608	0.02304	1.37959	0.170816	0.300677	-5.44326	[MF] 2-keto-3-deoxygluconate:proton symporter activity
GO:0045910	0.04572	0.02286	1.37874	0.171079	0.300677	-5.4444	[BP] negative regulation of DNA recombination
GO:0030151	0.4552	0.2276	1.37811	0.171271	0.300677	-5.44523	[MF] molybdenum ion binding
GO:0043140	0.04544	0.02272	1.37806	0.171287	0.300677	-5.4453	[MF] ATP-dependent 3'-5' DNA helicase activity
GO:0009279	0.13444	0.06722	1.37659	0.171741	0.301079	-5.44725	[CC] cell outer membrane
GO:0016780	0.068	0.034	1.37598	0.171928	0.301079	-5.44805	[MF] phosphotransferase activity, for other substituted phosphate groups
GO:0006825	0.0776	0.0388	1.37431	0.172443	0.301621	-5.45026	[BP] copper ion transport
GO:0004151	0.27466	0.60033	1.36881	0.174151	0.304245	-5.45751	[MF] dihydroorotase activity
GO:0008795	0.09546	0.04773	1.36745	0.174576	0.304624	-5.45931	[MF] NAD+ synthase activity
GO:0070180	0.43406	0.21703	1.36249	0.176129	0.306968	-5.46582	[MF] large ribosomal subunit rRNA binding
GO:0004639	-0.4138	0.47458	-1.36161	0.176407	0.307011	-5.46697	[MF] phosphoribosylaminoimidazolesuccinocarboxamide synthase activity
GO:0006515	0.13514	0.06757	1.35978	0.176983	0.307011	-5.46937	[BP] misfolded or incompletely synthesized protein catabolic process
GO:0033554	0.13514	0.06757	1.35978	0.176983	0.307011	-5.46937	[BP] cellular response to stress
GO:0019145	0.27028	0.13514	1.35909	0.177203	0.307011	-5.47028	[MF] aminobutyraldehyde dehydrogenase activity
GO:0033737	0.27028	0.13514	1.35909	0.177203	0.307011	-5.47028	[MF] 1-pyrroline dehydrogenase activity
GO:0006188	0.1062	0.0531	1.3509	0.179803	0.311148	-5.48096	[BP] IMP biosynthetic process
GO:0008763	0.15608	0.12046	1.34895	0.180425	0.311475	-5.48349	[MF] UDP-N-acetylmuramate-L-alanine ligase activity
GO:0006742	0.0942	0.0471	1.34831	0.18063	0.311475	-5.48432	[BP] NADP catabolic process
GO:0019363	0.0942	0.0471	1.34831	0.18063	0.311475	-5.48432	[BP] pyridine nucleotide biosynthetic process
GO:0004345	0.08664	0.04332	1.34687	0.181093	0.311905	-5.48619	[MF] glucose-6-phosphate dehydrogenase activity
GO:0004068	0.1866	0.0933	1.34471	0.181789	0.312571	-5.489	[MF] aspartate 1-decarboxylase activity
GO:0008865	0.08186	0.04093	1.34434	0.181906	0.312571	-5.48947	[MF] fructokinase activity
GO:0003879	0.19826	0.11183	1.34296	0.182351	0.312677	-5.49126	[MF] ATP phosphoribosyltransferase activity
GO:0006072	0.30784	0.62118	1.34283	0.182395	0.312677	-5.49143	[BP] glycerol-3-phosphate metabolic process
GO:0009405	0.14102	0.07051	1.34055	0.18313	0.31357	-5.49437	[BP] pathogenesis
GO:0008641	0.13546	0.09453	1.33955	0.183455	0.313714	-5.49566	[MF] small protein activating enzyme activity
GO:0004315	0.21576	0.10788	1.33811	0.183921	0.313714	-5.49752	[MF] 3-oxoacyl-[acyl-carrier-protein] synthase activity
GO:0005345	0.03432	0.01716	1.33808	0.183932	0.313714	-5.49756	[MF] purine nucleobase transmembrane transporter activity
GO:0004851	0.1728	0.0864	1.33699	0.184286	0.313714	-5.49896	[MF] uroporphyrin-III C-methyltransferase activity
GO:0051266	0.1728	0.0864	1.33699	0.184286	0.313714	-5.49896	[MF] sirohydrochlorin ferrochelatase activity
GO:0008784	0.06172	0.03086	1.33311	0.18555	0.315052	-5.50394	[MF] alanine racemase activity
GO:0030632	0.06172	0.03086	1.33311	0.18555	0.315052	-5.50394	[BP] D-alanine biosynthetic process
GO:0016998	0.8205	2.00161	1.33242	0.185778	0.315052	-5.50484	[BP] cell wall macromolecule catabolic process
GO:0000310	0.4614	0.58852	1.33007	0.186547	0.315052	-5.50785	[MF] xanthine phosphoribosyltransferase activity
GO:0032265	0.4614	0.58852	1.33007	0.186547	0.315052	-5.50785	[BP] XMP salvage
GO:0003935	0.05842	0.02921	1.32946	0.186749	0.315052	-5.50863	[MF] GTP cyclohydrolase II activity
GO:0003952	0.14058	0.10093	1.32936	0.186779	0.315052	-5.50875	[MF] NAD+ synthase (glutamine-hydrolyzing) activity
GO:0000902	0.14778	0.09563	1.32932	0.186793	0.315052	-5.50881	[BP] cell morphogenesis
GO:0033177	0.34176	0.45856	1.32762	0.187352	0.315631	-5.51098	[CC] proton-transporting two-sector ATPase complex, proton-transporting domain
GO:0005694	0.44854	0.22427	1.32693	0.187578	0.315649	-5.51186	[CC] chromosome
GO:0009052	0.2246	0.20344	1.32305	0.188864	0.317447	-5.51682	[BP] pentose-phosphate shunt, non-oxidative branch
GO:0015078	0.85206	1.10975	1.31928	0.190114	0.319182	-5.52162	[MF] hydrogen ion transmembrane transporter activity
GO:0008861	0.84076	1.71996	1.31611	0.191173	0.319807	-5.52565	[MF] formate C-acetyltransferase activity
GO:0003989	0.36802	0.43879	1.31522	0.191471	0.319807	-5.52678	[MF] acetyl-CoA carboxylase activity
GO:0009317	0.36802	0.43879	1.31522	0.191471	0.319807	-5.52678	[CC] acetyl-CoA carboxylase complex
GO:0008716	0.17132	0.08566	1.31354	0.192033	0.319807	-5.5289	[MF] D-alanine-D-alanine ligase activity
GO:0009107	0.13704	0.06852	1.31302	0.192208	0.319807	-5.52956	[BP] lipoate biosynthetic process
GO:0016415	0.13704	0.06852	1.31302	0.192208	0.319807	-5.52956	[MF] octanoyltransferase activity
GO:0033819	0.13704	0.06852	1.31302	0.192208	0.319807	-5.52956	[MF] lipoyl(octanoyl) transferase activity
GO:0046917	0.1941	0.09705	1.31203	0.192539	0.319807	-5.53081	[MF] triphosphoribosyl-dephospho-CoA synthase activity
GO:0006629	0.1804	0.25414	1.3119	0.192585	0.319807	-5.53098	[BP] lipid metabolic process
GO:0043752	-0.16086	0.08043	-1.31164	0.192671	0.319807	-5.5313	[MF] adenosylcobinamide kinase activity
GO:0016156	0.04402	0.02201	1.30711	0.194199	0.321979	-5.53702	[MF] fumarate reductase (NADH) activity
GO:0008324	0.29804	0.49102	1.30283	0.195652	0.323602	-5.54241	[MF] cation transmembrane transporter activity
GO:0036381	0.26596	0.13298	1.30227	0.195841	0.323602	-5.5431	[MF] pyridoxal 5'-phosphate synthase (glutamine hydrolysing) activity
GO:0042819	0.26596	0.13298	1.30227	0.195841	0.323602	-5.5431	[BP] vitamin B6 biosynthetic process
GO:0004497	0.06092	0.03046	1.29952	0.196779	0.324786	-5.54655	[MF] monooxygenase activity
GO:0004643	0.19352	0.2288	1.29688	0.197684	0.325911	-5.54986	[MF] phosphoribosylaminoimidazolecarboxamide formyltransferase activity
GO:0042351	0.15274	0.07637	1.29508	0.1983	0.326193	-5.55211	[BP] 'de novo' GDP-L-fucose biosynthetic process
GO:0050577	0.15274	0.07637	1.29508	0.1983	0.326193	-5.55211	[MF] GDP-L-fucose synthase activity
GO:0033818	0.20758	0.10379	1.28732	0.20098	0.330229	-5.56177	[MF] beta-ketoacyl-acyl-carrier-protein synthase III activity
GO:0004871	0.29052	0.14526	1.28628	0.20134	0.330451	-5.56306	[MF] signal transducer activity
GO:0004368	0.03582	0.01791	1.28199	0.202836	0.332534	-5.56837	[MF] glycerol-3-phosphate dehydrogenase activity
GO:0030788	0.14312	0.07156	1.27565	0.205061	0.33502	-5.57619	[MF] precorrin-2 C20-methyltransferase activity
GO:0003690	0.50668	0.7128	1.27423	0.20556	0.33502	-5.57793	[MF] double-stranded DNA binding
GO:0001407	0.11532	0.05766	1.27317	0.205936	0.33502	-5.57925	[BP] glycerophosphodiester transport
GO:0015794	0.11532	0.05766	1.27317	0.205936	0.33502	-5.57925	[BP] glycerol-3-phosphate transport
GO:0055052	0.11532	0.05766	1.27317	0.205936	0.33502	-5.57925	[CC] ATP-binding cassette (ABC) transporter complex, substrate-binding subunit-containing
GO:0009607	0.4974	0.61458	1.27309	0.205963	0.33502	-5.57934	[BP] response to biotic stimulus
GO:0008679	0.1087	0.05435	1.27245	0.206189	0.33502	-5.58012	[MF] 2-hydroxy-3-oxopropionate reductase activity
GO:0046487	0.1087	0.05435	1.27245	0.206189	0.33502	-5.58012	[BP] glyoxylate metabolic process
GO:0004124	0.10282	0.05141	1.27146	0.206541	0.33502	-5.58134	[MF] cysteine synthase activity
GO:0000921	0.02544	0.01272	1.27053	0.20687	0.33502	-5.58248	[BP] septin ring assembly
GO:0005940	0.02544	0.01272	1.27053	0.20687	0.33502	-5.58248	[CC] septin ring
GO:0004617	0.2951	0.26315	1.26876	0.207497	0.335663	-5.58465	[MF] phosphoglycerate dehydrogenase activity
GO:0004066	0.49796	0.62622	1.26736	0.207994	0.335765	-5.58636	[MF] asparagine synthase (glutamine-hydrolyzing) activity
GO:0008736	0.02512	0.01256	1.26665	0.208248	0.335765	-5.58723	[MF] L-fucose isomerase activity
GO:0042355	0.02512	0.01256	1.26665	0.208248	0.335765	-5.58723	[BP] L-fucose catabolic process
GO:0015299	0.07744	0.03872	1.26506	0.208815	0.336309	-5.58917	[MF] solute:proton antiporter activity
GO:0031226	0.14504	0.21144	1.26287	0.209599	0.336882	-5.59184	[CC] intrinsic component of plasma membrane
GO:0006261	0.19706	0.13265	1.26278	0.209631	0.336882	-5.59195	[BP] DNA-dependent DNA replication
GO:0008762	0.29458	0.52775	1.26207	0.209883	0.336917	-5.59281	[MF] UDP-N-acetylmuramate dehydrogenase activity
GO:0004549	0.344	0.37876	1.26052	0.21044	0.337072	-5.5947	[MF] tRNA-specific ribonuclease activity
GO:0009022	0.344	0.37876	1.26052	0.21044	0.337072	-5.5947	[MF] tRNA nucleotidyltransferase activity
GO:0016831	0.10168	0.08116	1.25717	0.211647	0.338635	-5.59878	[MF] carboxy-lyase activity
GO:0042173	0.13472	0.06736	1.25478	0.212508	0.339641	-5.60167	[BP] regulation of sporulation resulting in formation of a cellular spore
GO:0008444	0.62336	1.38442	1.25165	0.213644	0.341053	-5.60546	[MF] CDP-diacylglycerol-glycerol-3-phosphate 3-phosphatidyltransferase activity
GO:0035438	0.11054	0.05527	1.25106	0.213857	0.341053	-5.60617	[MF] cyclic-di-GMP binding
GO:0016759	0.0232	0.0116	1.24334	0.216676	0.345173	-5.61547	[MF] cellulose synthase activity
GO:0004781	0.11916	0.05958	1.24183	0.217228	0.345301	-5.61727	[MF] sulfate adenylyltransferase (ATP) activity
GO:0019419	0.11916	0.05958	1.24183	0.217228	0.345301	-5.61727	[BP] sulfate reduction
GO:0050002	0.02288	0.01144	1.23895	0.218288	0.346609	-5.62072	[MF] D-proline reductase (dithiol) activity
GO:0008422	0.47444	0.44716	1.23599	0.219381	0.347967	-5.62426	[MF] beta-glucosidase activity
GO:0016772	0.1954	0.0977	1.2347	0.219861	0.348351	-5.6258	[MF] transferase activity, transferring phosphorus-containing groups
GO:0009025	0.1189	0.05945	1.22309	0.224196	0.354079	-5.63958	[MF] tagatose-bisphosphate aldolase activity
GO:0004516	0.09114	0.04557	1.22307	0.224202	0.354079	-5.6396	[MF] nicotinate phosphoribosyltransferase activity
GO:0019357	0.09114	0.04557	1.22307	0.224202	0.354079	-5.6396	[BP] nicotinate nucleotide biosynthetic process
GO:0009007	0.30406	0.28107	1.22082	0.225051	0.355038	-5.64226	[MF] site-specific DNA-methyltransferase (adenine-specific) activity
GO:0003917	0.10824	0.05412	1.21891	0.225771	0.35579	-5.64451	[MF] DNA topoisomerase type I activity
GO:0052654	-0.11212	0.14314	-1.21355	0.227804	0.357837	-5.65081	[MF] L-leucine transaminase activity
GO:0052655	-0.11212	0.14314	-1.21355	0.227804	0.357837	-5.65081	[MF] L-valine transaminase activity
GO:0052656	-0.11212	0.14314	-1.21355	0.227804	0.357837	-5.65081	[MF] L-isoleucine transaminase activity
GO:0004150	0.15828	0.07914	1.20982	0.229224	0.359683	-5.65517	[MF] dihydroneopterin aldolase activity
GO:0005198	0.0313	0.02919	1.20581	0.230762	0.36133	-5.65986	[MF] structural molecule activity
GO:0016485	0.02436	0.01218	1.20579	0.230768	0.36133	-5.65987	[BP] protein processing
GO:0004340	0.24222	0.63123	1.19931	0.233267	0.364854	-5.66741	[MF] glucokinase activity
GO:0016837	-0.27866	0.18497	-1.19807	0.233748	0.365215	-5.66885	[MF] carbon-oxygen lyase activity, acting on polysaccharides
GO:0045148	0.10232	0.05116	1.19645	0.234374	0.365804	-5.67072	[MF] tripeptide aminopeptidase activity
GO:0000906	0.30544	0.34364	1.19337	0.235572	0.366891	-5.67428	[MF] 6,7-dimethyl-8-ribityllumazine synthase activity
GO:0009349	0.30544	0.34364	1.19337	0.235572	0.366891	-5.67428	[CC] riboflavin synthase complex
GO:0004534	0.07874	0.05225	1.1873	0.237945	0.36937	-5.68126	[MF] 5'-3' exoribonuclease activity
GO:0006826	0.57548	0.8707	1.18672	0.238173	0.36937	-5.68192	[BP] iron ion transport
GO:0006879	0.57548	0.8707	1.18672	0.238173	0.36937	-5.68192	[BP] cellular iron ion homeostasis
GO:0008199	0.57548	0.8707	1.18672	0.238173	0.36937	-5.68192	[MF] ferric iron binding
GO:0008299	0.1595	0.12469	1.18331	0.239516	0.37106	-5.68583	[BP] isoprenoid biosynthetic process
GO:0003979	0.10342	0.05171	1.18206	0.240008	0.371429	-5.68726	[MF] UDP-glucose 6-dehydrogenase activity
GO:0046914	0.97076	1.84598	1.17913	0.241169	0.372832	-5.69061	[MF] transition metal ion binding
GO:0004834	0.30746	0.39765	1.16998	0.244814	0.377091	-5.701	[MF] tryptophan synthase activity
GO:0003977	0.10466	0.05233	1.16963	0.244954	0.377091	-5.7014	[MF] UDP-N-acetylglucosamine diphosphorylase activity
GO:0006048	0.10466	0.05233	1.16963	0.244954	0.377091	-5.7014	[BP] UDP-N-acetylglucosamine biosynthetic process
GO:0019134	0.10466	0.05233	1.16963	0.244954	0.377091	-5.7014	[MF] glucosamine-1-phosphate N-acetyltransferase activity
GO:0016032	0.05878	0.02939	1.16864	0.245351	0.377305	-5.70252	[BP] viral process
GO:0008706	0.10104	0.05052	1.16702	0.246003	0.37791	-5.70435	[MF] 6-phospho-beta-glucosidase activity
GO:0003855	0.27186	0.34121	1.15703	0.250042	0.383712	-5.71558	[MF] 3-dehydroquinate dehydratase activity
GO:0004022	-0.2065	0.14841	-1.15528	0.250752	0.384399	-5.71753	[MF] alcohol dehydrogenase (NAD) activity
GO:0004814	0.06518	0.05299	1.1505	0.252705	0.386583	-5.72287	[MF] arginine-tRNA ligase activity
GO:0006420	0.06518	0.05299	1.1505	0.252705	0.386583	-5.72287	[BP] arginyl-tRNA aminoacylation
GO:0004668	0.16684	0.08342	1.14037	0.256878	0.391739	-5.73409	[MF] protein-arginine deiminase activity
GO:0009446	0.16684	0.08342	1.14037	0.256878	0.391739	-5.73409	[BP] putrescine biosynthetic process
GO:0047632	0.16684	0.08342	1.14037	0.256878	0.391739	-5.73409	[MF] agmatine deiminase activity
GO:0004618	0.33114	0.43097	1.12894	0.261646	0.398595	-5.74665	[MF] phosphoglycerate kinase activity
GO:0016620	0.2349	0.27685	1.12479	0.263394	0.40084	-5.75118	[MF] oxidoreductase activity, acting on the aldehyde or oxo group of donors, NAD or NADP as acceptor
GO:0015407	0.20644	0.2759	1.11519	0.267467	0.403907	-5.76159	[MF] monosaccharide-transporting ATPase activity
GO:0004493	0.16034	0.11779	1.1125	0.268613	0.403907	-5.76449	[MF] methylmalonyl-CoA epimerase activity
GO:0004055	0.20882	0.48409	1.10974	0.269795	0.403907	-5.76746	[MF] argininosuccinate synthase activity
GO:0004034	0.24764	0.3286	1.10355	0.272461	0.403907	-5.7741	[MF] aldose 1-epimerase activity
GO:0019062	0.03084	0.02152	1.10088	0.273616	0.403907	-5.77695	[BP] virion attachment to host cell
GO:0004521	0.16546	0.17545	1.09983	0.27407	0.403907	-5.77807	[MF] endoribonuclease activity
GO:0008233	0.57484	1.4548	1.09803	0.274849	0.403907	-5.77998	[MF] peptidase activity
GO:0002100	0.33326	0.43401	1.09338	0.276877	0.403907	-5.78492	[BP] tRNA wobble adenosine to inosine editing
GO:0052717	0.33326	0.43401	1.09338	0.276877	0.403907	-5.78492	[MF] tRNA-specific adenosine-34 deaminase activity
GO:0004477	0.14472	0.1273	1.08195	0.281899	0.403907	-5.79696	[MF] methenyltetrahydrofolate cyclohydrolase activity
GO:0004488	0.14472	0.1273	1.08195	0.281899	0.403907	-5.79696	[MF] methylenetetrahydrofolate dehydrogenase (NADP+) activity
GO:0008766	0.13016	0.2458	1.0794	0.283028	0.403907	-5.79963	[MF] UDP-N-acetylmuramoylalanyl-D-glutamyl-2,6-diaminopimelate-D-alanyl-D-alanine ligase activity
GO:0047480	0.13016	0.2458	1.0794	0.283028	0.403907	-5.79963	[MF] UDP-N-acetylmuramoyl-tripeptide-D-alanyl-D-alanine ligase activity
GO:0022877	0.43304	0.22688	1.07407	0.2854	0.403907	-5.8052	[MF] protein-N(PI)-phosphohistidine-fructose phosphotransferase system transporter activity
GO:0006177	0.38508	0.56498	1.07154	0.286529	0.403907	-5.80783	[BP] GMP biosynthetic process
GO:0003961	0.35358	0.39597	1.0704	0.287038	0.403907	-5.80901	[MF] O-acetylhomoserine aminocarboxypropyltransferase activity
GO:0003962	0.35358	0.39597	1.0704	0.287038	0.403907	-5.80901	[MF] cystathionine gamma-synthase activity
GO:0055114	1.62522	0.86203	1.06223	0.290711	0.403907	-5.81746	[BP] oxidation-reduction process
GO:0003886	0.28406	0.57917	1.05431	0.294304	0.403907	-5.82559	[MF] DNA (cytosine-5-)-methyltransferase activity
GO:0019512	0.10304	0.06682	1.05287	0.294959	0.403907	-5.82706	[BP] lactose catabolic process via tagatose-6-phosphate
GO:0017076	0.2537	0.24661	1.05028	0.296142	0.403907	-5.8297	[MF] purine nucleotide binding
GO:0004659	0.1065	0.08359	1.04779	0.297285	0.403907	-5.83224	[MF] prenyltransferase activity
GO:0030604	0.12072	0.09882	1.02547	0.307635	0.403907	-5.85467	[MF] 1-deoxy-D-xylulose-5-phosphate reductoisomerase activity
GO:0070402	0.12072	0.09882	1.02547	0.307635	0.403907	-5.85467	[MF] NADPH binding
GO:0004830	0.2114	0.55018	1.02057	0.309944	0.403907	-5.85955	[MF] tryptophan-tRNA ligase activity
GO:0006436	0.2114	0.55018	1.02057	0.309944	0.403907	-5.85955	[BP] tryptophanyl-tRNA aminoacylation
GO:0015426	0.17934	0.21053	1.02019	0.310123	0.403907	-5.85992	[MF] polar-amino acid-transporting ATPase activity
GO:0004636	0.20546	0.20583	1.01277	0.313637	0.403907	-5.86724	[MF] phosphoribosyl-ATP diphosphatase activity
GO:0004827	-0.2663	0.23019	-1.01117	0.314396	0.403907	-5.86881	[MF] proline-tRNA ligase activity
GO:0006433	-0.2663	0.23019	-1.01117	0.314396	0.403907	-5.86881	[BP] prolyl-tRNA aminoacylation
GO:0019386	0.49046	0.24523	1.00561	0.317049	0.403907	-5.87425	[BP] methanogenesis, from carbon dioxide
GO:0030269	0.49046	0.24523	1.00561	0.317049	0.403907	-5.87425	[MF] tetrahydromethanopterin S-methyltransferase activity
GO:0000172	0.3077	0.15385	1.00533	0.317186	0.403907	-5.87453	[CC] ribonuclease MRP complex
GO:0006379	0.3077	0.15385	1.00533	0.317186	0.403907	-5.87453	[BP] mRNA cleavage
GO:0030677	0.3077	0.15385	1.00533	0.317186	0.403907	-5.87453	[CC] ribonuclease P complex
GO:0003960	-0.22728	0.11364	-1.00494	0.317373	0.403907	-5.87491	[MF] NADPH:quinone reductase activity
GO:0046405	-0.2174	0.1087	-1.00486	0.317411	0.403907	-5.87499	[MF] glycerol dehydratase activity
GO:0006824	0.21066	0.10533	1.0048	0.317441	0.403907	-5.87505	[BP] cobalt ion transport
GO:0008852	-0.20408	0.10204	-1.00473	0.317472	0.403907	-5.87511	[MF] exodeoxyribonuclease I activity
GO:0004872	0.19722	0.09861	1.00466	0.317508	0.403907	-5.87518	[MF] receptor activity
GO:0019164	-0.1923	0.09615	-1.0046	0.317537	0.403907	-5.87524	[MF] pyruvate synthase activity
GO:0004657	-0.18692	0.09346	-1.00453	0.31757	0.403907	-5.87531	[MF] proline dehydrogenase activity
GO:0009316	0.18436	0.09218	1.00449	0.317587	0.403907	-5.87534	[CC] 3-isopropylmalate dehydratase complex
GO:0017103	0.17468	0.08734	1.00434	0.317659	0.403907	-5.87549	[MF] UTP:galactose-1-phosphate uridylyltransferase activity
GO:0018580	-0.16806	0.08403	-1.00423	0.317715	0.403907	-5.8756	[MF] nitronate monooxygenase activity
GO:0004300	0.15474	0.07737	1.00394	0.31785	0.403907	-5.87588	[MF] enoyl-CoA hydratase activity
GO:0050114	-0.15268	0.07634	-1.00389	0.317874	0.403907	-5.87593	[MF] myo-inosose-2 dehydratase activity
GO:0015948	0.14448	0.07224	1.00367	0.31798	0.403907	-5.87614	[BP] methanogenesis
GO:0042409	0.13542	0.06771	1.00338	0.318121	0.403907	-5.87643	[MF] caffeoyl-CoA O-methyltransferase activity
GO:0043822	0.12866	0.06433	1.00312	0.318246	0.403907	-5.87668	[MF] ribonuclease M5 activity
GO:0006760	0.12842	0.06421	1.00311	0.318251	0.403907	-5.87669	[BP] folic acid-containing compound metabolic process
GO:0006523	0.12714	0.06357	1.00305	0.318277	0.403907	-5.87674	[BP] alanine biosynthetic process
GO:0010285	0.1245	0.06225	1.00294	0.318333	0.403907	-5.87686	[MF] L,L-diaminopimelate aminotransferase activity
GO:0043590	0.1227	0.06135	1.00285	0.318373	0.403907	-5.87694	[CC] bacterial nucleoid
GO:0006793	0.12074	0.06037	1.00276	0.318419	0.403907	-5.87703	[BP] phosphorus metabolic process
GO:0046316	-0.12064	0.06032	-1.00275	0.318422	0.403907	-5.87704	[MF] gluconokinase activity
GO:0003985	-0.11976	0.05988	-1.00271	0.318443	0.403907	-5.87708	[MF] acetyl-CoA C-acetyltransferase activity
GO:0006725	0.1173	0.05865	1.00258	0.318506	0.403907	-5.87721	[BP] cellular aromatic compound metabolic process
GO:0008198	0.1173	0.05865	1.00258	0.318506	0.403907	-5.87721	[MF] ferrous iron binding
GO:0020002	-0.1173	0.05865	-1.00258	0.318506	0.403907	-5.87721	[CC] host cell plasma membrane
GO:0047070	0.1173	0.05865	1.00258	0.318506	0.403907	-5.87721	[MF] 3-carboxyethylcatechol 2,3-dioxygenase activity
GO:0019165	-0.1151	0.05755	-1.00245	0.318565	0.403907	-5.87733	[MF] thiamine kinase activity
GO:0004850	0.11256	0.05628	1.0023	0.318638	0.403907	-5.87748	[MF] uridine phosphorylase activity
GO:0006450	-0.1099	0.05495	-1.00213	0.31872	0.403907	-5.87764	[BP] regulation of translational fidelity
GO:0009772	0.10752	0.05376	1.00197	0.318799	0.403907	-5.8778	[BP] photosynthetic electron transport in photosystem II
GO:0045156	0.10752	0.05376	1.00197	0.318799	0.403907	-5.8778	[MF] electron transporter, transferring electrons within the cyclic electron transport pathway of photosynthesis activity
GO:0009108	0.1073	0.05365	1.00195	0.318806	0.403907	-5.87782	[BP] coenzyme biosynthetic process
GO:0017148	0.10526	0.05263	1.0018	0.318878	0.403907	-5.87796	[BP] negative regulation of translation
GO:0042256	0.10526	0.05263	1.0018	0.318878	0.403907	-5.87796	[BP] mature ribosome assembly
GO:0090071	0.10526	0.05263	1.0018	0.318878	0.403907	-5.87796	[BP] negative regulation of ribosome biogenesis
GO:0004126	-0.10362	0.05181	-1.00168	0.318939	0.403907	-5.87809	[MF] cytidine deaminase activity
GO:0008854	0.10362	0.05181	1.00168	0.318939	0.403907	-5.87809	[MF] exodeoxyribonuclease V activity
GO:0033883	-0.1031	0.05155	-1.00163	0.318959	0.403907	-5.87813	[MF] pyridoxal phosphatase activity
GO:0044283	-0.1031	0.05155	-1.00163	0.318959	0.403907	-5.87813	[BP] small molecule biosynthetic process
GO:0004632	0.10286	0.05143	1.00161	0.318968	0.403907	-5.87814	[MF] phosphopantothenate--cysteine ligase activity
GO:0015941	0.10286	0.05143	1.00161	0.318968	0.403907	-5.87814	[BP] pantothenate catabolic process
GO:0004849	0.10262	0.05131	1.0016	0.318978	0.403907	-5.87816	[MF] uridine kinase activity
GO:0044211	0.10262	0.05131	1.0016	0.318978	0.403907	-5.87816	[BP] CTP salvage
GO:0042121	0.10204	0.05102	1.00155	0.319001	0.403907	-5.87821	[BP] alginic acid biosynthetic process
GO:0004746	0.10198	0.05099	1.00154	0.319003	0.403907	-5.87821	[MF] riboflavin synthase activity
GO:0032264	0.10152	0.05076	1.0015	0.319021	0.403907	-5.87825	[BP] IMP salvage
GO:0008697	0.10104	0.05052	1.00146	0.319041	0.403907	-5.87829	[MF] 4-deoxy-L-threo-5-hexosulose-uronate ketol-isomerase activity
GO:0045490	0.10104	0.05052	1.00146	0.319041	0.403907	-5.87829	[BP] pectin catabolic process
GO:0003964	-0.1005	0.05025	-1.00142	0.319063	0.403907	-5.87834	[MF] RNA-directed DNA polymerase activity
GO:0016993	0.10044	0.05022	1.00141	0.319066	0.403907	-5.87834	[MF] precorrin-8X methylmutase activity
GO:0009013	-0.1	0.05	-1.00137	0.319084	0.403907	-5.87838	[MF] succinate-semialdehyde dehydrogenase [NAD(P)+] activity
GO:0004113	-0.099	0.0495	-1.00128	0.319127	0.403907	-5.87847	[MF] 2',3'-cyclic-nucleotide 3'-phosphodiesterase activity
GO:0004563	0.099	0.0495	1.00128	0.319127	0.403907	-5.87847	[MF] beta-N-acetylhexosaminidase activity
GO:0008664	-0.099	0.0495	-1.00128	0.319127	0.403907	-5.87847	[MF] 2'-5'-RNA ligase activity
GO:0019932	0.09862	0.04931	1.00125	0.319144	0.403907	-5.8785	[BP] second-messenger-mediated signaling
GO:0004016	-0.0981	0.04905	-1.0012	0.319167	0.403907	-5.87855	[MF] adenylate cyclase activity
GO:0003920	0.09804	0.04902	1.0012	0.31917	0.403907	-5.87855	[MF] GMP reductase activity
GO:1902560	0.09804	0.04902	1.0012	0.31917	0.403907	-5.87855	[CC] GMP reductase complex
GO:0006935	0.09716	0.04858	1.00111	0.31921	0.403907	-5.87863	[BP] chemotaxis
GO:0006051	0.0957	0.04785	1.00097	0.319278	0.403907	-5.87877	[BP] N-acetylmannosamine metabolic process
GO:0047465	0.0957	0.04785	1.00097	0.319278	0.403907	-5.87877	[MF] N-acylglucosamine-6-phosphate 2-epimerase activity
GO:0004337	0.09532	0.04766	1.00093	0.319297	0.403907	-5.87881	[MF] geranyltranstransferase activity
GO:0008872	0.09524	0.04762	1.00092	0.319301	0.403907	-5.87882	[MF] glucarate dehydratase activity
GO:0006580	-0.09302	0.04651	-1.00069	0.319413	0.403907	-5.87904	[BP] ethanolamine metabolic process
GO:0008765	0.09206	0.04603	1.00058	0.319464	0.403907	-5.87915	[MF] UDP-N-acetylmuramoylalanyl-D-glutamate-2,6-diaminopimelate ligase activity
GO:0016430	0.09184	0.04592	1.00056	0.319476	0.403907	-5.87917	[MF] tRNA (adenine-N6-)-methyltransferase activity
GO:0006089	0.09174	0.04587	1.00055	0.319482	0.403907	-5.87918	[BP] lactate metabolic process
GO:0047051	0.09174	0.04587	1.00055	0.319482	0.403907	-5.87918	[MF] D-lactate dehydrogenase (cytochrome c-553) activity
GO:0002084	-0.09146	0.04573	-1.00051	0.319497	0.403907	-5.87921	[BP] protein depalmitoylation
GO:0008474	-0.09146	0.04573	-1.00051	0.319497	0.403907	-5.87921	[MF] palmitoyl-(protein) hydrolase activity
GO:0052689	-0.09146	0.04573	-1.00051	0.319497	0.403907	-5.87921	[MF] carboxylic ester hydrolase activity
GO:0008886	0.0909	0.04545	1.00045	0.319528	0.403907	-5.87928	[MF] glyceraldehyde-3-phosphate dehydrogenase (NADP+) (non-phosphorylating) activity
GO:0006782	-0.0902	0.0451	-1.00037	0.319568	0.403907	-5.87936	[BP] protoporphyrinogen IX biosynthetic process
GO:0006744	0.0885	0.04425	1.00016	0.319669	0.403907	-5.87956	[BP] ubiquinone biosynthetic process
GO:0008425	0.0885	0.04425	1.00016	0.319669	0.403907	-5.87956	[MF] 2-polyprenyl-6-methoxy-1,4-benzoquinone methyltransferase activity
GO:0043857	0.08826	0.04413	1.00013	0.319683	0.403907	-5.87959	[MF] N-acetylornithine carbamoyltransferase activity
GO:0052381	-0.0881	0.04405	-1.00011	0.319693	0.403907	-5.87961	[MF] tRNA dimethylallyltransferase activity
GO:0004076	0.088	0.044	1.00009	0.319699	0.403907	-5.87962	[MF] biotin synthase activity
GO:0019008	0.088	0.044	1.00009	0.319699	0.403907	-5.87962	[CC] molybdopterin synthase complex
GO:0061597	0.088	0.044	1.00009	0.319699	0.403907	-5.87962	[MF] cyclic pyranopterin monophosphate synthase activity
GO:0004398	-0.08752	0.04376	-1.00003	0.319729	0.403907	-5.87968	[MF] histidine decarboxylase activity
GO:0006547	-0.08752	0.04376	-1.00003	0.319729	0.403907	-5.87968	[BP] histidine metabolic process
GO:0015774	0.08696	0.04348	0.999959	0.319765	0.403907	-5.87975	[BP] polysaccharide transport
GO:0047736	0.08686	0.04343	0.999945	0.319771	0.403907	-5.87977	[MF] cellobiose epimerase activity
GO:0008565	0.08684	0.04342	0.999943	0.319773	0.403907	-5.87977	[MF] protein transporter activity
GO:0008915	0.08678	0.04339	0.999935	0.319776	0.403907	-5.87978	[MF] lipid-A-disaccharide synthase activity
GO:0004823	0.08658	0.04329	0.999908	0.319789	0.403907	-5.8798	[MF] leucine-tRNA ligase activity
GO:0006429	0.08658	0.04329	0.999908	0.319789	0.403907	-5.8798	[BP] leucyl-tRNA aminoacylation
GO:0009044	0.08634	0.04317	0.999875	0.319805	0.403907	-5.87983	[MF] xylan 1,4-beta-xylosidase activity
GO:0004316	0.08624	0.04312	0.999862	0.319812	0.403907	-5.87985	[MF] 3-oxoacyl-[acyl-carrier-protein] reductase (NADPH) activity
GO:0004462	0.0862	0.0431	0.999856	0.319814	0.403907	-5.87985	[MF] lactoylglutathione lyase activity
GO:0009678	0.08602	0.04301	0.999832	0.319826	0.403907	-5.87988	[MF] hydrogen-translocating pyrophosphatase activity
GO:0015992	0.08602	0.04301	0.999832	0.319826	0.403907	-5.87988	[BP] proton transport
GO:0004655	0.0858	0.0429	0.999801	0.319841	0.403907	-5.87991	[MF] porphobilinogen synthase activity
GO:0046820	0.08492	0.04246	0.999677	0.3199	0.403907	-5.88003	[MF] 4-amino-4-deoxychorismate synthase activity
GO:0008753	0.08474	0.04237	0.999652	0.319913	0.403907	-5.88005	[MF] NADPH dehydrogenase (quinone) activity
GO:0019546	0.08468	0.04234	0.999643	0.319917	0.403907	-5.88006	[BP] arginine deiminase pathway
GO:0019547	0.08468	0.04234	0.999643	0.319917	0.403907	-5.88006	[BP] arginine catabolic process to ornithine
GO:0000737	0.08404	0.04202	0.99955	0.319962	0.403907	-5.88015	[BP] DNA catabolic process, endonucleolytic
GO:0019239	0.08404	0.04202	0.99955	0.319962	0.403907	-5.88015	[MF] deaminase activity
GO:0006811	0.08372	0.04186	0.999502	0.319985	0.403907	-5.8802	[BP] ion transport
GO:0030964	0.0831	0.04155	0.999409	0.32003	0.403907	-5.88029	[CC] NADH dehydrogenase complex
GO:0008673	0.08232	0.04116	0.999288	0.320088	0.403907	-5.8804	[MF] 2-dehydro-3-deoxygluconokinase activity
GO:0008831	0.08164	0.04082	0.99918	0.32014	0.403907	-5.88051	[MF] dTDP-4-dehydrorhamnose reductase activity
GO:0006007	0.0805	0.04025	0.998994	0.32023	0.403907	-5.88069	[BP] glucose catabolic process
GO:0006754	0.07958	0.03979	0.998837	0.320305	0.403907	-5.88084	[BP] ATP biosynthetic process
GO:0030254	0.07958	0.03979	0.998837	0.320305	0.403907	-5.88084	[BP] protein secretion by the type III secretion system
GO:0030257	0.07958	0.03979	0.998837	0.320305	0.403907	-5.88084	[CC] type III protein secretion system complex
GO:0044780	0.07958	0.03979	0.998837	0.320305	0.403907	-5.88084	[BP] bacterial-type flagellum assembly
GO:0071973	0.07958	0.03979	0.998837	0.320305	0.403907	-5.88084	[BP] bacterial-type flagellum-dependent cell motility
GO:0010124	0.07938	0.03969	0.998802	0.320322	0.403907	-5.88088	[BP] phenylacetate catabolic process
GO:0047475	0.07938	0.03969	0.998802	0.320322	0.403907	-5.88088	[MF] phenylacetate-CoA ligase activity
GO:0019136	0.0792	0.0396	0.998771	0.320337	0.403907	-5.88091	[MF] deoxynucleoside kinase activity
GO:0008989	0.07908	0.03954	0.99875	0.320348	0.403907	-5.88093	[MF] rRNA (guanine-N1-)-methyltransferase activity
GO:0052911	0.07908	0.03954	0.99875	0.320348	0.403907	-5.88093	[MF] 23S rRNA (guanine(745)-N(1))-methyltransferase activity
GO:0042773	0.07892	0.03946	0.998721	0.320361	0.403907	-5.88095	[BP] ATP synthesis coupled electron transport
GO:0004057	0.07874	0.03937	0.998689	0.320377	0.403907	-5.88099	[MF] arginyltransferase activity
GO:0016598	0.07874	0.03937	0.998689	0.320377	0.403907	-5.88099	[BP] protein arginylation
GO:0004586	-0.07852	0.03926	-0.99865	0.320396	0.403907	-5.88102	[MF] ornithine decarboxylase activity
GO:0012506	0.07832	0.03916	0.998614	0.320413	0.403907	-5.88106	[CC] vesicle membrane
GO:0008868	0.07822	0.03911	0.998595	0.320422	0.403907	-5.88108	[MF] galactitol-1-phosphate 5-dehydrogenase activity
GO:0004373	0.07764	0.03882	0.998488	0.320473	0.403907	-5.88118	[MF] glycogen (starch) synthase activity
GO:0009011	0.07764	0.03882	0.998488	0.320473	0.403907	-5.88118	[MF] starch synthase activity
GO:0008803	0.07762	0.03881	0.998485	0.320475	0.403907	-5.88118	[MF] bis(5'-nucleosyl)-tetraphosphatase (symmetrical) activity
GO:0043805	0.07754	0.03877	0.99847	0.320482	0.403907	-5.8812	[MF] indolepyruvate ferredoxin oxidoreductase activity
GO:0016799	0.07658	0.03829	0.998287	0.320571	0.403907	-5.88138	[MF] hydrolase activity, hydrolyzing N-glycosyl compounds
GO:0008851	0.07608	0.03804	0.998189	0.320618	0.403907	-5.88147	[MF] ethanolamine ammonia-lyase activity
GO:0004143	0.07548	0.03774	0.998069	0.320676	0.403907	-5.88159	[MF] diacylglycerol kinase activity
GO:0050242	0.0754	0.0377	0.998053	0.320684	0.403907	-5.8816	[MF] pyruvate, phosphate dikinase activity
GO:0005451	0.07478	0.03739	0.997925	0.320745	0.403907	-5.88173	[MF] monovalent cation:proton antiporter activity
GO:0019521	0.07456	0.03728	0.997879	0.320767	0.403907	-5.88177	[BP] D-gluconate metabolic process
GO:0050215	0.07436	0.03718	0.997837	0.320788	0.403907	-5.88181	[MF] propanediol dehydratase activity
GO:0006388	0.073	0.0365	0.997541	0.32093	0.403907	-5.8821	[BP] tRNA splicing, via endonucleolytic cleavage and ligation
GO:0019594	0.07286	0.03643	0.99751	0.320946	0.403907	-5.88213	[BP] mannitol metabolic process
GO:0003882	0.07272	0.03636	0.997478	0.320961	0.403907	-5.88216	[MF] CDP-diacylglycerol-serine O-phosphatidyltransferase activity
GO:0051186	0.07234	0.03617	0.997392	0.321003	0.403907	-5.88224	[BP] cofactor metabolic process
GO:0051912	0.07234	0.03617	0.997392	0.321003	0.403907	-5.88224	[MF] CoB--CoM heterodisulfide reductase activity
GO:0050524	0.07212	0.03606	0.997341	0.321027	0.403907	-5.88229	[MF] coenzyme-B sulfoethylthiotransferase activity
GO:2001118	0.07006	0.03503	0.996843	0.321268	0.403907	-5.88277	[BP] tetrahydromethanopterin biosynthetic process
GO:0000967	0.06994	0.03497	0.996813	0.321282	0.403907	-5.8828	[BP] rRNA 5'-end processing
GO:0004582	0.06968	0.03484	0.996746	0.321314	0.403907	-5.88287	[MF] dolichyl-phosphate beta-D-mannosyltransferase activity
GO:0034000	0.0685	0.03425	0.996436	0.321464	0.403907	-5.88317	[MF] chondroitin-sulfate-ABC endolyase activity
GO:0016051	0.0666	0.0333	0.995902	0.321722	0.403907	-5.88368	[BP] carbohydrate biosynthetic process
GO:0009030	0.06578	0.03289	0.995658	0.32184	0.403907	-5.88392	[MF] thiamine-phosphate kinase activity
GO:0005990	-0.06558	0.03279	-0.995597	0.32187	0.403907	-5.88398	[BP] lactose catabolic process
GO:0050044	-0.06558	0.03279	-0.995597	0.32187	0.403907	-5.88398	[MF] galactose-6-phosphate isomerase activity
GO:0034618	0.06514	0.03257	0.995461	0.321936	0.403907	-5.88411	[MF] arginine binding
GO:0051259	0.06514	0.03257	0.995461	0.321936	0.403907	-5.88411	[BP] protein oligomerization
GO:0006568	0.0637	0.03185	0.994995	0.322161	0.403907	-5.88456	[BP] tryptophan metabolic process
GO:0006576	-0.0631	0.03155	-0.994792	0.322259	0.403907	-5.88476	[BP] cellular biogenic amine metabolic process
GO:0042242	-0.0628	0.0314	-0.994689	0.322309	0.403907	-5.88486	[MF] cobyrinic acid a,c-diamide synthase activity
GO:0034017	0.0622	0.0311	0.994477	0.322412	0.403907	-5.88506	[MF] trans-2-decenoyl-acyl-carrier-protein isomerase activity
GO:0005850	0.06164	0.03082	0.994274	0.32251	0.403907	-5.88526	[CC] eukaryotic translation initiation factor 2 complex
GO:0008705	-0.06154	0.03077	-0.994237	0.322528	0.403907	-5.88529	[MF] methionine synthase activity
GO:0008972	0.06134	0.03067	0.994163	0.322564	0.403907	-5.88536	[MF] phosphomethylpyrimidine kinase activity
GO:0016639	0.07228	0.08512	0.99345	0.322909	0.403907	-5.88605	[MF] oxidoreductase activity, acting on the CH-NH2 group of donors, NAD or NADP as acceptor
GO:0004837	0.05946	0.02973	0.993429	0.322919	0.403907	-5.88607	[MF] tyrosine decarboxylase activity
GO:0006570	0.05946	0.02973	0.993429	0.322919	0.403907	-5.88607	[BP] tyrosine metabolic process
GO:0004134	0.05754	0.06027	0.993	0.323127	0.403907	-5.88649	[MF] 4-alpha-glucanotransferase activity
GO:0047295	0.0569	0.02845	0.992314	0.32346	0.403907	-5.88715	[MF] geranylgeranylglycerol-phosphate geranylgeranyltransferase activity
GO:0033512	0.05438	0.02719	0.991063	0.324068	0.403907	-5.88835	[BP] L-lysine catabolic process to acetyl-CoA via saccharopine
GO:0045252	0.05438	0.02719	0.991063	0.324068	0.403907	-5.88835	[CC] oxoglutarate dehydrogenase complex
GO:0004127	0.05406	0.02703	0.990892	0.324151	0.403907	-5.88852	[MF] cytidylate kinase activity
GO:0008612	0.05222	0.02611	0.989848	0.324658	0.403907	-5.88952	[BP] peptidyl-lysine modification to peptidyl-hypusine
GO:0034038	0.05222	0.02611	0.989848	0.324658	0.403907	-5.88952	[MF] deoxyhypusine synthase activity
GO:0050983	0.05222	0.02611	0.989848	0.324658	0.403907	-5.88952	[BP] deoxyhypusine biosynthetic process from spermidine
GO:0050454	0.05142	0.02571	0.98936	0.324896	0.403907	-5.88999	[MF] coenzyme F420 hydrogenase activity
GO:0036094	0.05116	0.02558	0.989196	0.324975	0.403907	-5.89015	[MF] small molecule binding
GO:0016774	0.05102	0.02551	0.989107	0.325018	0.403907	-5.89023	[MF] phosphotransferase activity, carboxyl group as acceptor
GO:0002128	0.05076	0.02538	0.98894	0.3251	0.403907	-5.89039	[BP] tRNA nucleoside ribose methylation
GO:0042558	-0.05002	0.02501	-0.988451	0.325338	0.403907	-5.89086	[BP] pteridine-containing compound metabolic process
GO:0015105	0.04922	0.02461	0.987897	0.325608	0.403907	-5.89139	[MF] arsenite transmembrane transporter activity
GO:0015700	0.04922	0.02461	0.987897	0.325608	0.403907	-5.89139	[BP] arsenite transport
GO:0004791	0.04878	0.02439	0.987582	0.325762	0.403907	-5.8917	[MF] thioredoxin-disulfide reductase activity
GO:0006415	-0.04878	0.02439	-0.987582	0.325762	0.403907	-5.8917	[BP] translational termination
GO:0019430	0.04878	0.02439	0.987582	0.325762	0.403907	-5.8917	[BP] removal of superoxide radicals
GO:0015234	0.04854	0.02427	0.987406	0.325847	0.403907	-5.89186	[MF] thiamine transmembrane transporter activity
GO:0044238	0.04854	0.02427	0.987406	0.325847	0.403907	-5.89186	[BP] primary metabolic process
GO:0008519	0.09156	0.1652	0.987305	0.325897	0.403907	-5.89196	[MF] ammonium transmembrane transporter activity
GO:0008817	-0.0474	0.0237	-0.986536	0.326272	0.403907	-5.8927	[MF] cob(I)yrinic acid a,c-diamide adenosyltransferase activity
GO:0005354	0.04728	0.02364	0.986441	0.326318	0.403907	-5.89279	[MF] galactose transmembrane transporter activity
GO:0008986	0.04686	0.02343	0.986103	0.326483	0.403907	-5.89311	[MF] pyruvate, water dikinase activity
GO:0051304	0.04684	0.02342	0.986086	0.326491	0.403907	-5.89313	[BP] chromosome separation
GO:0006508	0.04562	0.02281	0.985051	0.326997	0.403907	-5.89412	[BP] proteolysis
GO:0033179	0.04554	0.02277	0.98498	0.327032	0.403907	-5.89419	[CC] proton-transporting V-type ATPase, V0 domain
GO:0003916	0.04514	0.02257	0.984621	0.327207	0.403907	-5.89453	[MF] DNA topoisomerase activity
GO:0042597	0.27176	0.55174	0.984402	0.327314	0.403907	-5.89474	[CC] periplasmic space
GO:0006139	0.04478	0.02239	0.98429	0.327369	0.403907	-5.89485	[BP] nucleobase-containing compound metabolic process
GO:0002935	0.04382	0.02191	0.983369	0.32782	0.403907	-5.89573	[MF] tRNA (adenine-C2-)-methyltransferase activity
GO:0070040	0.04382	0.02191	0.983369	0.32782	0.403907	-5.89573	[MF] rRNA (adenine-C2-)-methyltransferase activity
GO:0000270	-0.04338	0.02169	-0.982927	0.328036	0.403907	-5.89615	[BP] peptidoglycan metabolic process
GO:0008933	-0.04338	0.02169	-0.982927	0.328036	0.403907	-5.89615	[MF] lytic transglycosylase activity
GO:0009276	0.04184	0.02092	0.981274	0.328846	0.404564	-5.89773	[CC] Gram-negative-bacterium-type cell wall
GO:0016811	0.0406	0.0203	0.979812	0.329564	0.404726	-5.89912	[MF] hydrolase activity, acting on carbon-nitrogen (but not peptide) bonds, in linear amides
GO:0016920	0.04032	0.02016	0.979464	0.329735	0.404726	-5.89945	[MF] pyroglutamyl-peptidase activity
GO:0006064	0.08088	0.08656	0.979158	0.329885	0.404726	-5.89974	[BP] glucuronate catabolic process
GO:0004809	0.0393	0.01965	0.978136	0.330388	0.404726	-5.90071	[MF] tRNA (guanine-N2-)-methyltransferase activity
GO:0015087	0.03868	0.01934	0.977279	0.33081	0.404726	-5.90153	[MF] cobalt ion transmembrane transporter activity
GO:0008798	0.03862	0.01931	0.977194	0.330851	0.404726	-5.90161	[MF] beta-aspartyl-peptidase activity
GO:0008890	0.03838	0.01919	0.976851	0.331021	0.404726	-5.90193	[MF] glycine C-acetyltransferase activity
GO:0004515	-0.03774	0.01887	-0.975904	0.331487	0.404726	-5.90283	[MF] nicotinate-nucleotide adenylyltransferase activity
GO:0050334	0.03738	0.01869	0.975352	0.33176	0.404726	-5.90335	[MF] thiaminase activity
GO:0019295	0.03676	0.01838	0.974364	0.332247	0.404726	-5.90429	[BP] coenzyme M biosynthetic process
GO:0050532	0.03676	0.01838	0.974364	0.332247	0.404726	-5.90429	[MF] 2-phosphosulfolactate phosphatase activity
GO:0005337	0.0367	0.01835	0.974266	0.332296	0.404726	-5.90438	[MF] nucleoside transmembrane transporter activity
GO:0050662	0.26338	0.56861	0.973546	0.332651	0.404728	-5.90506	[MF] coenzyme binding
GO:0017057	0.03598	0.01799	0.973053	0.332895	0.404728	-5.90553	[MF] 6-phosphogluconolactonase activity
GO:0004848	-0.03514	0.01757	-0.971549	0.333639	0.404728	-5.90695	[MF] ureidoglycolate hydrolase activity
GO:0006417	-0.03514	0.01757	-0.971549	0.333639	0.404728	-5.90695	[BP] regulation of translation
GO:0050418	0.03488	0.01744	0.971063	0.33388	0.404728	-5.90741	[MF] hydroxylamine reductase activity
GO:0005507	0.0348	0.0174	0.970911	0.333956	0.404728	-5.90755	[MF] copper ion binding
GO:0047348	0.03424	0.01712	0.969821	0.334496	0.404856	-5.90858	[MF] glycerol-3-phosphate cytidylyltransferase activity
GO:0030337	0.03412	0.01706	0.969581	0.334615	0.404856	-5.90881	[MF] DNA polymerase processivity factor activity
GO:0046474	0.03312	0.01656	0.967487	0.335655	0.405315	-5.91078	[BP] glycerophospholipid biosynthetic process
GO:0047294	0.03312	0.01656	0.967487	0.335655	0.405315	-5.91078	[MF] phosphoglycerol geranylgeranyltransferase activity
GO:0034257	0.03278	0.01639	0.966734	0.33603	0.405315	-5.91148	[MF] nicotinamide riboside transmembrane transporter activity
GO:0004308	-0.03264	0.01632	-0.966417	0.336187	0.405315	-5.91178	[MF] exo-alpha-sialidase activity
GO:0000107	0.12888	0.12192	0.965765	0.336512	0.405315	-5.91239	[MF] imidazoleglycerol-phosphate synthase activity
GO:0016758	0.03202	0.01601	0.96497	0.336908	0.405315	-5.91314	[MF] transferase activity, transferring hexosyl groups
GO:0043773	0.032	0.016	0.964922	0.336932	0.405315	-5.91318	[MF] coenzyme F420-0 gamma-glutamyl ligase activity
GO:0004417	0.03126	0.01563	0.963087	0.337847	0.405664	-5.9149	[MF] hydroxyethylthiazole kinase activity
GO:0008047	-0.0312	0.0156	-0.962933	0.337924	0.405664	-5.91505	[MF] enzyme activator activity
GO:0051606	0.0311	0.01555	0.962674	0.338053	0.405664	-5.91529	[BP] detection of stimulus
GO:0006857	0.03034	0.01517	0.960632	0.339075	0.406092	-5.9172	[BP] oligopeptide transport
GO:0015197	0.03034	0.01517	0.960632	0.339075	0.406092	-5.9172	[MF] peptide transporter activity
GO:0046656	0.02986	0.01493	0.959268	0.339758	0.406092	-5.91847	[BP] folic acid biosynthetic process
GO:0015420	-0.02952	0.01476	-0.958265	0.34026	0.406092	-5.9194	[MF] cobalamin-transporting ATPase activity
GO:0006285	0.02904	0.01452	0.956794	0.340998	0.406092	-5.92077	[BP] base-excision repair, AP site formation
GO:0008263	0.02904	0.01452	0.956794	0.340998	0.406092	-5.92077	[MF] pyrimidine-specific mismatch base pair DNA N-glycosylase activity
GO:0015093	-0.02846	0.01423	-0.954927	0.341937	0.406092	-5.92251	[MF] ferrous iron transmembrane transporter activity
GO:0015979	-0.02844	0.01422	-0.954861	0.34197	0.406092	-5.92257	[BP] photosynthesis
GO:0015995	-0.02844	0.01422	-0.954861	0.34197	0.406092	-5.92257	[BP] chlorophyll biosynthetic process
GO:0016851	-0.02844	0.01422	-0.954861	0.34197	0.406092	-5.92257	[MF] magnesium chelatase activity
GO:0006886	0.0282	0.0141	0.954056	0.342376	0.406092	-5.92331	[BP] intracellular protein transport
GO:0043571	0.02786	0.01393	0.952884	0.342966	0.406092	-5.9244	[BP] maintenance of CRISPR repeat elements
GO:0046685	0.02786	0.01393	0.952884	0.342966	0.406092	-5.9244	[BP] response to arsenic-containing substance
GO:0051607	0.02786	0.01393	0.952884	0.342966	0.406092	-5.9244	[BP] defense response to virus
GO:0030245	0.02758	0.01379	0.95189	0.343468	0.406092	-5.92532	[BP] cellulose catabolic process
GO:0030247	0.02758	0.01379	0.95189	0.343468	0.406092	-5.92532	[MF] polysaccharide binding
GO:0008652	-0.0267	0.01335	-0.94858	0.345141	0.406092	-5.92838	[BP] cellular amino acid biosynthetic process
GO:0008781	0.02634	0.01317	0.94714	0.34587	0.406092	-5.9297	[MF] N-acylneuraminate cytidylyltransferase activity
GO:0008899	0.026	0.013	0.945732	0.346585	0.406092	-5.931	[MF] homoserine O-succinyltransferase activity
GO:0019281	0.026	0.013	0.945732	0.346585	0.406092	-5.931	[BP] L-methionine biosynthetic process from homoserine via O-succinyl-L-homoserine and cystathionine
GO:0006432	0.19438	0.21989	0.944476	0.347223	0.406092	-5.93215	[BP] phenylalanyl-tRNA aminoacylation
GO:0004736	0.02562	0.01281	0.944099	0.347414	0.406092	-5.9325	[MF] pyruvate carboxylase activity
GO:0004822	0.0256	0.0128	0.944011	0.347459	0.406092	-5.93258	[MF] isoleucine-tRNA ligase activity
GO:0006428	0.0256	0.0128	0.944011	0.347459	0.406092	-5.93258	[BP] isoleucyl-tRNA aminoacylation
GO:0003993	0.02552	0.01276	0.943658	0.347638	0.406092	-5.9329	[MF] acid phosphatase activity
GO:0003919	0.02542	0.01271	0.943213	0.347865	0.406092	-5.93331	[MF] FMN adenylyltransferase activity
GO:0006747	0.02542	0.01271	0.943213	0.347865	0.406092	-5.93331	[BP] FAD biosynthetic process
GO:0008531	0.02542	0.01271	0.943213	0.347865	0.406092	-5.93331	[MF] riboflavin kinase activity
GO:0009398	0.02542	0.01271	0.943213	0.347865	0.406092	-5.93331	[BP] FMN biosynthetic process
GO:0000413	-0.0253	0.01265	-0.942673	0.34814	0.406092	-5.93381	[BP] protein peptidyl-prolyl isomerization
GO:0005528	-0.0253	0.01265	-0.942673	0.34814	0.406092	-5.93381	[MF] FK506 binding
GO:0042802	-0.0253	0.01265	-0.942673	0.34814	0.406092	-5.93381	[MF] identical protein binding
GO:0061077	-0.0253	0.01265	-0.942673	0.34814	0.406092	-5.93381	[BP] chaperone-mediated protein folding
GO:0047112	0.02528	0.01264	0.942582	0.348186	0.406092	-5.93389	[MF] pyruvate oxidase activity
GO:0004496	0.02504	0.01252	0.941479	0.348748	0.406092	-5.9349	[MF] mevalonate kinase activity
GO:0006525	0.02494	0.01247	0.941011	0.348987	0.406092	-5.93533	[BP] arginine metabolic process
GO:0008804	0.02494	0.01247	0.941011	0.348987	0.406092	-5.93533	[MF] carbamate kinase activity
GO:0006080	0.02484	0.01242	0.940538	0.349228	0.406092	-5.93576	[BP] substituted mannan metabolic process
GO:0016985	0.02484	0.01242	0.940538	0.349228	0.406092	-5.93576	[MF] mannan endo-1,4-beta-mannosidase activity
GO:0004163	0.02412	0.01206	0.93698	0.351046	0.407419	-5.93901	[MF] diphosphomevalonate decarboxylase activity
GO:0019287	0.02412	0.01206	0.93698	0.351046	0.407419	-5.93901	[BP] isopentenyl diphosphate biosynthetic process, mevalonate pathway
GO:0019404	0.02406	0.01203	0.936671	0.351204	0.407419	-5.93929	[BP] galactitol catabolic process
GO:0006302	0.02304	0.01152	0.931095	0.354066	0.409955	-5.94435	[BP] double-strand break repair
GO:0033390	0.02296	0.01148	0.930631	0.354305	0.409955	-5.94477	[BP] putrescine biosynthetic process from arginine via N-carbamoylputrescine
GO:0050231	0.02296	0.01148	0.930631	0.354305	0.409955	-5.94477	[MF] putrescine carbamoyltransferase activity
GO:0000716	-0.02282	0.01141	-0.929808	0.354729	0.409955	-5.94551	[BP] transcription-coupled nucleotide-excision repair, DNA damage recognition
GO:0039620	0.0228	0.0114	0.929689	0.35479	0.409955	-5.94562	[CC] T=7 icosahedral viral capsid
GO:0015821	0.02266	0.01133	0.928852	0.355222	0.41013	-5.94638	[BP] methionine transport
GO:0009036	-0.0222	0.0111	-0.926003	0.356693	0.41118	-5.94895	[MF] Type II site-specific deoxyribonuclease activity
GO:0030699	0.0222	0.0111	0.926003	0.356693	0.41118	-5.94895	[MF] glycine reductase activity
GO:0031222	0.15752	0.26896	0.925349	0.357031	0.411246	-5.94953	[BP] arabinan catabolic process
GO:0003743	0.42694	0.47081	0.924772	0.35733	0.411267	-5.95005	[MF] translation initiation factor activity
GO:0070008	-0.09076	0.1636	-0.923888	0.357788	0.41147	-5.95085	[MF] serine-type exopeptidase activity
GO:0042132	0.02166	0.01083	0.922462	0.358527	0.411512	-5.95213	[MF] fructose 1,6-bisphosphate 1-phosphatase activity
GO:0008703	0.02162	0.01081	0.922191	0.358668	0.411512	-5.95237	[MF] 5-amino-6-(5-phosphoribosylamino)uracil reductase activity
GO:0008835	0.02162	0.01081	0.922191	0.358668	0.411512	-5.95237	[MF] diaminohydroxyphosphoribosylaminopyrimidine deaminase activity
GO:0044689	0.02142	0.01071	0.920815	0.359382	0.41177	-5.9536	[MF] 7,8-didemethyl-8-hydroxy-5-deazariboflavin synthase activity
GO:0003844	0.0214	0.0107	0.920676	0.359455	0.41177	-5.95373	[MF] 1,4-alpha-glucan branching enzyme activity
GO:0004512	0.02114	0.01057	0.918835	0.360412	0.411985	-5.95538	[MF] inositol-3-phosphate synthase activity
GO:0006021	0.02114	0.01057	0.918835	0.360412	0.411985	-5.95538	[BP] inositol biosynthetic process
GO:0046429	-0.02112	0.01056	-0.918691	0.360487	0.411985	-5.9555	[MF] 4-hydroxy-3-methylbut-2-en-1-yl diphosphate synthase activity
GO:0008962	0.021	0.0105	0.917819	0.360941	0.412182	-5.95628	[MF] phosphatidylglycerophosphatase activity
GO:0042742	0.5513	1.82523	0.909516	0.365284	0.416816	-5.96366	[BP] defense response to bacterium
GO:0051989	0.01964	0.00982	0.907013	0.366599	0.41777	-5.96587	[MF] coproporphyrinogen dehydrogenase activity
GO:0046140	-0.01962	0.00981	-0.90684	0.36669	0.41777	-5.96602	[BP] corrin biosynthetic process
GO:0071949	-0.01934	0.00967	-0.904376	0.367989	0.418923	-5.96819	[MF] FAD binding
GO:0008714	-0.2792	0.31352	-0.902125	0.369177	0.41995	-5.97017	[MF] AMP nucleosidase activity
GO:0046538	0.08794	0.07639	0.900049	0.370275	0.420665	-5.97199	[MF] 2,3-bisphosphoglycerate-dependent phosphoglycerate mutase activity
GO:0003922	0.3139	0.51437	0.89985	0.370381	0.420665	-5.97217	[MF] GMP synthase (glutamine-hydrolyzing) activity
GO:0005829	0.1552	0.206	0.898425	0.371136	0.421196	-5.97341	[CC] cytosol
GO:0043171	0.01846	0.00923	0.896039	0.372402	0.422306	-5.97549	[BP] peptide catabolic process
GO:0004527	-0.23458	0.32135	-0.894893	0.373012	0.42267	-5.97649	[MF] exonuclease activity
GO:0016705	0.018	0.009	0.891292	0.374931	0.424515	-5.97962	[MF] oxidoreductase activity, acting on paired donors, with incorporation or reduction of molecular oxygen
GO:0008174	0.01768	0.00884	0.887817	0.376788	0.426289	-5.98263	[MF] mRNA methyltransferase activity
GO:0052855	-0.08126	0.15453	-0.886954	0.37725	0.426482	-5.98337	[MF] ADP-dependent NAD(P)H-hydrate dehydratase activity
GO:0050485	0.01752	0.00876	0.886024	0.377749	0.426716	-5.98418	[MF] oxidoreductase activity, acting on X-H and Y-H to form an X-Y bond, with a disulfide as acceptor
GO:0008186	0.01744	0.00872	0.885113	0.378238	0.426939	-5.98496	[MF] RNA-dependent ATPase activity
GO:0008184	-0.01736	0.00868	-0.884192	0.378732	0.427168	-5.98575	[MF] glycogen phosphorylase activity
GO:0004309	0.26674	0.36695	0.881099	0.380395	0.428714	-5.98841	[MF] exopolyphosphatase activity
GO:0015577	0.0167	0.00835	0.876205	0.383037	0.431004	-5.99259	[MF] galactitol transmembrane transporter activity
GO:0004004	0.01666	0.00833	0.875698	0.383311	0.431004	-5.99303	[MF] ATP-dependent RNA helicase activity
GO:0009409	0.01666	0.00833	0.875698	0.383311	0.431004	-5.99303	[BP] response to cold
GO:0016884	0.01538	0.00769	0.857888	0.393024	0.441586	-6.00805	[MF] carbon-nitrogen ligase activity, with glutamine as amido-N-donor
GO:0004049	0.01494	0.00747	0.850986	0.396828	0.445518	-6.01379	[MF] anthranilate synthase activity
GO:0016755	-0.18064	0.3542	-0.833772	0.406414	0.455931	-6.02791	[MF] transferase activity, transferring amino-acyl groups
GO:0008967	0.1355	0.15797	0.830901	0.408026	0.457389	-6.03024	[MF] phosphoglycolate phosphatase activity
GO:0033920	0.07892	0.05476	0.827565	0.409904	0.458944	-6.03294	[MF] 6-phospho-beta-galactosidase activity
GO:0008836	-0.11422	0.09235	-0.827325	0.41004	0.458944	-6.03313	[MF] diaminopimelate decarboxylase activity
GO:0003941	0.43632	1.33904	0.815262	0.416877	0.46624	-6.04278	[MF] L-serine ammonia-lyase activity
GO:0008615	0.21608	0.4484	0.814247	0.417455	0.46646	-6.04359	[BP] pyridoxine biosynthetic process
GO:0052692	0.1375	0.26217	0.813798	0.417711	0.46646	-6.04394	[MF] raffinose alpha-galactosidase activity
GO:0006265	0.60034	0.65271	0.81083	0.419405	0.467756	-6.04629	[BP] DNA topological change
GO:0004077	0.05456	0.05644	0.810646	0.419511	0.467756	-6.04644	[MF] biotin-[acetyl-CoA-carboxylase] ligase activity
GO:0004514	0.06378	0.05925	0.804013	0.423313	0.471637	-6.05165	[MF] nicotinate-nucleotide diphosphorylase (carboxylating) activity
GO:0009379	0.16442	0.36125	0.803416	0.423656	0.47166	-6.05212	[CC] Holliday junction helicase complex
GO:0031515	-0.04108	0.06394	-0.797219	0.427229	0.475276	-6.05695	[CC] tRNA (m1A) methyltransferase complex
GO:0003908	0.27578	0.73137	0.793492	0.429386	0.477313	-6.05984	[MF] methylated-DNA-[protein]-cysteine S-methyltransferase activity
GO:0008965	0.0921	0.23883	0.777342	0.438808	0.487103	-6.07221	[MF] phosphoenolpyruvate-protein phosphotransferase activity
GO:0050897	0.02862	0.02091	0.776977	0.439023	0.487103	-6.07248	[MF] cobalt ion binding
GO:0001514	0.01144	0.00572	0.77669	0.439191	0.487103	-6.0727	[BP] selenocysteine incorporation
GO:0042586	0.36608	0.94102	0.775836	0.439693	0.48729	-6.07335	[MF] peptide deformylase activity
GO:0008794	0.16354	0.20755	0.764133	0.446603	0.494574	-6.08213	[MF] arsenate reductase (glutaredoxin) activity
GO:0016429	0.148	0.42556	0.756016	0.451432	0.499544	-6.08815	[MF] tRNA (adenine-N1-)-methyltransferase activity
GO:0000179	0.14084	0.34542	0.750297	0.454853	0.50257	-6.09235	[MF] rRNA (adenine-N6,N6-)-dimethyltransferase activity
GO:0052908	0.14084	0.34542	0.750297	0.454853	0.50257	-6.09235	[MF] 16S rRNA (adenine(1518)-N(6)/adenine(1519)-N(6))-dimethyltransferase activity
GO:0000104	-0.21476	0.3127	-0.743208	0.459113	0.506829	-6.09751	[MF] succinate dehydrogenase activity
GO:0004356	0.10372	0.16714	0.742733	0.4594	0.506829	-6.09786	[MF] glutamate-ammonia ligase activity
GO:0000027	0.11362	0.13373	0.74085	0.460536	0.507699	-6.09922	[BP] ribosomal large subunit assembly
GO:0003911	0.15002	0.18801	0.740139	0.460965	0.50779	-6.09973	[MF] DNA ligase (NAD+) activity
GO:0008976	0.23494	0.34245	0.725977	0.469563	0.516673	-6.10986	[MF] polyphosphate kinase activity
GO:0097056	0.06508	0.06676	0.724649	0.470374	0.516673	-6.1108	[BP] selenocysteinyl-tRNA(Sec) biosynthetic process
GO:0004325	0.06306	0.05285	0.72454	0.470441	0.516673	-6.11088	[MF] ferrochelatase activity
GO:0006783	0.06306	0.05285	0.72454	0.470441	0.516673	-6.11088	[BP] heme biosynthetic process
GO:0005216	0.07752	0.09448	0.714413	0.476651	0.523101	-6.11798	[MF] ion channel activity
GO:0016791	0.12948	0.16784	0.707321	0.481026	0.527507	-6.1229	[MF] phosphatase activity
GO:0004013	-0.0706	0.13872	-0.697932	0.486854	0.533498	-6.12934	[MF] adenosylhomocysteinase activity
GO:0006047	0.14954	0.18651	0.691383	0.490941	0.537173	-6.13378	[BP] UDP-N-acetylglucosamine metabolic process
GO:0008761	0.14954	0.18651	0.691383	0.490941	0.537173	-6.13378	[MF] UDP-N-acetylglucosamine 2-epimerase activity
GO:0015986	0.36828	0.78322	0.672985	0.502523	0.549435	-6.14603	[BP] ATP synthesis coupled proton transport
GO:0004748	0.43228	1.5076	0.668576	0.50532	0.552081	-6.14892	[MF] ribonucleoside-diphosphate reductase activity, thioredoxin disulfide as acceptor
GO:0005315	0.24946	0.83219	0.64752	0.518792	0.566377	-6.16245	[MF] inorganic phosphate transmembrane transporter activity
GO:0008821	-0.1836	0.47672	-0.639872	0.523732	0.571344	-6.16726	[MF] crossover junction endodeoxyribonuclease activity
GO:0033925	0.00768	0.00384	0.635854	0.526337	0.573758	-6.16976	[MF] mannosyl-glycoprotein endo-beta-N-acetylglucosaminidase activity
GO:0006542	0.08782	0.15919	0.630811	0.529616	0.576903	-6.17288	[BP] glutamine biosynthetic process
GO:0055072	0.05526	0.05609	0.625028	0.533388	0.58058	-6.17643	[BP] iron ion homeostasis
GO:0004820	-0.14724	0.28692	-0.616918	0.538703	0.585356	-6.18135	[MF] glycine-tRNA ligase activity
GO:0006426	-0.14724	0.28692	-0.616918	0.538703	0.585356	-6.18135	[BP] glycyl-tRNA aminoacylation
GO:0004614	-0.10498	0.26141	-0.616504	0.538975	0.585356	-6.1816	[MF] phosphoglucomutase activity
GO:0031167	0.11036	0.26008	0.614935	0.540007	0.586041	-6.18255	[BP] rRNA methylation
GO:0017013	0.02232	0.03084	0.613295	0.541086	0.586778	-6.18353	[BP] protein flavinylation
GO:0016773	0.12856	0.34874	0.603532	0.547533	0.59333	-6.18933	[MF] phosphotransferase activity, alcohol group as acceptor
GO:0006614	0.12664	0.4123	0.599525	0.550191	0.594884	-6.19169	[BP] SRP-dependent cotranslational protein targeting to membrane
GO:0006555	0.04682	0.05011	0.597741	0.551376	0.594884	-6.19273	[BP] methionine metabolic process
GO:0001680	0.0595	0.16907	0.597696	0.551406	0.594884	-6.19276	[BP] tRNA 3'-terminal CCA addition
GO:0052927	0.0595	0.16907	0.597696	0.551406	0.594884	-6.19276	[MF] CTP:tRNA cytidylyltransferase activity
GO:0052928	0.0595	0.16907	0.597696	0.551406	0.594884	-6.19276	[MF] CTP:3'-cytidine-tRNA cytidylyltransferase activity
GO:0052929	0.0595	0.16907	0.597696	0.551406	0.594884	-6.19276	[MF] ATP:3'-cytidine-cytidine-tRNA adenylyltransferase activity
GO:0004807	0.13502	0.36867	0.590636	0.556108	0.599516	-6.19686	[MF] triose-phosphate isomerase activity
GO:0019835	0.37164	1.8527	0.588551	0.557501	0.600575	-6.19806	[BP] cytolysis
GO:0071266	0.02314	0.03375	0.584238	0.560387	0.603241	-6.20053	[BP] 'de novo' L-methionine biosynthetic process
GO:0004798	0.06496	0.07272	0.578068	0.564529	0.606807	-6.20404	[MF] thymidylate kinase activity
GO:0006233	0.06496	0.07272	0.578068	0.564529	0.606807	-6.20404	[BP] dTDP biosynthetic process
GO:0008097	0.10304	0.25272	0.560938	0.576105	0.618795	-6.21358	[MF] 5S rRNA binding
GO:0008094	-0.02536	0.02904	-0.557034	0.57876	0.621191	-6.21571	[MF] DNA-dependent ATPase activity
[truncated: 1,787 more rows]
[truncated: 2 more columns]

## Sheet: Supplementary Table 4
		Supplementary Table 4. Virus-bacteria co-occurrence network.
[truncated: 301 more rows]

[truncated: 1 more sheets: Supplementary Table 6]
